# Supplementary material for: The Long-Term Life-Cycle of Nevado de Toluca Volcano (Mexico): Insights Into the Origin of Petrologic Modes
Source: Frontiers journal article supplement (doi:10.3389/feart.2020.563303), 2020-09-28
Supplement: Table_1.XLSX [file Table_1.XLSX]

## Sheet: Samples
	Table S1: Sample numbers, coordiantes and locations.
	Sample #	Latitude	Longitude	Altitude	Location comment
	GW-16-01	19.1855	-99.6645	2876.73	BAF1-37 with degassing pipes in quarry near Zacango zoo
	GW-16-02, GW-18-01, 02	19.1837	-99.6646	2869.84	BAF on top of BAF-37 and yellowish LTP2 in Zacango quarry
	GW-16-04a-c	19.1883	-99.6623	2858.09	UTP3 section near Zacango zoo on roadcut
	GW-16-06, 07	19.2246	-99.676	2885.92	Bomb and lava sample of Tlacotepec scoria cone
	GW-16-09	19.1349	-99.6678	3036.17	Section west of Zaragoza BAF-13 pumice sample
	GW-16-10	19.1352	-99.6678	3017.87	BAF sample underlying LTP deposit in Zaragoza section
	GW-16-12	19.0552	-99.7972	3254.53	Sample of surge at base of pyroclastic sequence east of map4 unit 16
	GW-16-20-22	19.2309	-99.7822	2949.6	Quarry on road 134 near Zinacantepec, massive pyroclastic flow sequence
	GW-16-29	19.0828	-99.656	2897.12	Flow facies of MTP in riverbed overlying black paleosol north of Tlanixco
	GW-16-30	19.0818	-99.6576	2916.24	Pyroclastic flow with degassing pipes below UTP deposit north of Tlanixco
	GW-16-31	19.083	-99.6555	2885.84	BAF deposit between UTP and MTP5 in riverbed north of Tlanixco
	GW-16-32	19.0979	-99.6824	3068.15	BAF deposit below UTP in riverbed north of Tlanixco
	GW-16-33	19.0991	-99.6756	3102.34	Pyroclastic flow deposit below MTP in riverbed north of Tlanixco
	GW-16-33,34	19.0991	-99.6756	3103.46	MTP fallout deposit in riverbed north of Tlanixco
	GW-18-04	19.1854	-99.6645	2879.37	BAF-13 sample of juvenile blocks in Zaragoza section
	GW-18-05-07	19.1351	-99.6676	3013.85	Zaragoza section, BAF (05) of unknown age, LTP (06) and UTP (07)
	GW-18-08	19.1187	-99.6617	2948.25	Lava dome of unit 3 west of Balderas
	GW-18-11a-d, 12	19.0822	-99.6562	2914.34	MTP sample in river section (11) and BAF (12) of unknown age below MTP
	GW-18-13	19.2136	-99.7624	3008.13	Massive pink pumice flow in riverbed east of Ojo de Agua
	Gw-18-20-22	19.173	-99.7724	3393.5	Ochre pumice fallout units in steep Baranca north of crater
	GW-18-24	19.2239	-99.7876	3001.63	Uppermost surge deposit in Zinacantepec quarry south of road 134
	GW-18-26, 27	19.221	-99.8322	3294.7	Miocene lava of map unit 2 north of crater
	GW-18-28	19.1993	-99.8341	3188.61	Large lava dome unit 15 block sample containing xenolith
	GW-18-29	19.1856	-99.8055	3242.53	Unit 2 lava north of Raíces on roadcut
	GW-18-30, 31	19.1261	-99.8166	3521.74	Pyroclastic sequence of BAF and surges (BAF-37) NE of Cerro Gordo
	GW-18-33	19.085	-99.8522	3275.86	Las Palomas dome complex (unit 15), Block sample with enclaves
	GW-18-36	19.0739	-99.8436	3171.68	Yellow ash deposit above UTP in Capulin quarry on road 10
	GW-18-37	19.1167	-99.7597	4394.17	Unit 26 on inner northern crater wall
	GW-18-39	19.1156	-99.7674	4608.19	Reddish dome lava of unit 32 on inner western crater wall
	GW-18-40	19.1149	-99.7678	4591.07	Grey dome lava unit 32 on western crater wall
	GW-18-41	19.1144	-99.768	4588.28	Glassy crater dome unit 31, western crater wall
	GW-18-42	19.1095	-99.7689	4576.5	Dome unit 31 on western crater wall
	GW-18-43	19.1019	-99.7677	4683.96	Highest point of crater dome unit 30
	GW-18-44	19.1007	-99.7586	4426.36	Dome of unit 19 southern part of crater wall
	GW-18-45	19.1004	-99.7509	4312.93	Dome of unit 19 southern part of crater wall
	GW-18-46	19.0989	-99.749	4295.61	Unit 20 southern extension of crater domes
	GW-18-47	19.1067	-99.757	4152.01	Ombligo dome in crater
	GW-18-48	19.1309	-99.756	3937.43	Northern crater lava flow of unit 24
	GW-18-49	19.1019	-99.7335	4132.03	Western crater lava flow of unit 33
	GW-18-50	19.0919	-99.7997	3683.53	Dome unit 9 west of main crater
	GW-18-52	19.0242	-99.7896	2910.42	Juvenile block of BAF dated 970ka with enclaves north of Coatepec Harinas
	GW-18-53	19.0318	-99.7272	3090.26	Crystal rich unit 8 dome lava north of La Cieneguilla
	GW-18-54	19.021	-99.7287	2717.2	Block sample of unit 4 lava north of La Cieneguilla
	GW-18-55	18.8933	-99.6462	1884.03	Lava flow of cinder cone near Villa Guerrero
	LP-16-01,02	19.1111	-99.7476	4444.26	Crater rim dome of map unit 25
	LP-16-03	19.1115	-99.7497	4385.61	Dome of map unit 25, some alteration
	LP-16-04	19.1121	-99.7511	4358.7	Unit 25 dome with less alteration
	LP-16-05	19.1109	-99.7565	4214.59	High crystallinity shear banded lava northern Laguna del Sol
	LP-16-06	19.1107	-99.7565	4204.46	Ombligo dome in crater
	LP-16-07	19.1204	-99.7415	4157.95	Dome of map unit 29 near crater
	LP-16-09, 10	19.0594	-99.6711	2971.49	Unit 21 cone west of Tlanixco, enclaves and slightly altered
	LP-16-11	19.0691	-99.6645	2949.84	Miocene lava flow in baranca west of Tlanixco
	LP-16-13	19.062	-99.7954	3409.3	Southern lava flow of unit 6 containing enclaves
	LP-16-14	19.0707	-99.8093	3579.91	Block sample of unit 16 dome, some alteration
	LP-16-16	18.9165	-99.9414	2378.31	Southern monogenetic cone of Texcaltitlán
	LP-16-17	18.924	-99.9464	2415.4	Northern monogenetic cone of Texcaltitlán
	LP-16-18	19.0484	-99.8876	3061.58	Block sample of relatively mafic near vent lava unit 23
	LP-16-19	19.0452	-99.8764	2999.25	Distal facies of lava unit 23
	LP-16-20	19.1105	-99.8408	3359.68	Dome complex map unit 7 west of crater, containing enclaves
	LP-16-21	19.1157	-99.8231	3478.5	Cerro Gordo dome block sample
	LP-16-22	19.1552	-99.8051	3517.2	Lava flow on roadcut south of Raíces, map unit 5
	LP-16-23	19.1102	-99.7859	3963.77	Block sample on base of massive cliff unit 27
	LP-16-24	19.1438	-99.8029	3641.13	Lava flow on roadcut in unit 5
	LP-16-25	19.0757	-99.7498	3802.41	Unit 13 southern lava flow containing enclaves
	LP-16-26	19.0844	-99.743	3799.94	Lava flow of unit 20 in valley cut south of main crater
	LP-16-27	19.0764	-99.7388	3750.1	Unit 12 lava flow south of main crater
	LP-16-28	19.0975	-99.6915	3220.21	Block sample of lava dome west of Pueblo Nuevo
	LP-16-30	19.0896	-99.6397	2805.15	Western lobe of Tenango lava flow
	LP-16-29	19.0849	-99.6479	2840.33	Lava flow of unit 3 on road 55, some alteration
	GW-18-56	18.8583	-99.6641	1870.61	Dyke on highway 55 roadcut NE of Ixtapan de la Sal
	1 BAF: Block and Ash Flow			4 Map and Unit refrerences are refering to Torres-Orozco et al. (2016)
	2 LTP: Lower Toluca Pumice			5 MTP: Middle Toluca Pumice
	3 UTP: Upper Toluca Pumice

## Sheet: Bulk-rock
	Table S2: Bulk-rock major and trace element chemistry.
	Sample Number	Reference1	Eruptive stage	Unit name	Age constraint2	Age (ka)3	SiO2	TiO2	Al2O3	FeOt	MnO	MgO	CaO	Na2O	K2O	P2O5	Sc	V	Cr	Co	Ni	Cu	Zn	Rb	Sr	Y	Zr	Nb	Mo	Cs	Ba	La	Ce	Pr	Nd	Sm	Eu	Gd	Tb	Dy	Ho	Er	Tm	Yb	Lu	Hf	Ta	Pb	Th
	LP-16-06	Weber et al., (2020)	Recent Nevado	Ombligo	geochronology	9	65.31	0.57	17.28	3.375	0.06	1.68	4.57	4.8	1.84	0.15	9.263	59.7223	34.6903	7.28667	8.65	5.26233	55.5587	39.262	588.239	12.1907	130.006	4.45633	1.20467	1.96667	474.62	15.0113	30.9307	3.764	15.67	3.20233	1.09133	2.751	0.383333	2.35533	0.434667	1.183	0.173333	1.13567	0.164667	3.38233	0.317333	11.5767	3.21267
	LP-16-06	Weber et al., (2020)	Recent Nevado	Ombligo	geochronology	9	65.26	0.57	17.28	3.384	0.06	1.68	4.57	4.81	1.85	0.15	9.15767	59.269	135.139	7.59933	8.814	5.53333	55.0177	38.0827	577.634	11.9447	130.794	4.482	1.24067	1.86533	470.301	14.8537	30.6757	3.73933	15.521	3.202	1.07733	2.71933	0.382333	2.32233	0.432333	1.164	0.162333	1.19767	0.161667	3.54167	0.326333	8.158	3.144
	GW-16-08a	Weber et al., (2020)	Young PD	MTP	geochronology	13.893	63.92	0.67	17.64	3.897	0.07	1.88	4.41	4.45	1.82	0.18	9.74433	64.112	40.9623	7.87333	10.708	8.56233	61.5557	38.4927	555.679	13.656	151.215	5.39967	1.16867	1.90867	534.547	17.3453	36.753	4.47833	18.7763	3.82667	1.17833	3.27033	0.447333	2.66167	0.482	1.36467	0.187333	1.26867	0.184667	3.98533	0.377333	9.00267	3.59333
	GW-16-08b	Weber et al., (2020)	Young PD	MTP	geochronology	13.893	63.09	0.7	18.62	4.05	0.08	1.93	4.57	4.37	1.7	0.18	10.4147	65.7043	40.0373	8.6315	10.992	7.51653	68.583	36.1067	583.667	14.2313	157.967	5.4308	1.09107	1.91283	547.983	17.3973	36.9053	4.5391	18.8067	3.8812	1.1838	3.2772	0.468333	2.703	0.524367	1.35363	0.2018	1.2979	0.197267	4.09313	0.392433	9.1439	3.66147
	GW-16-08	Weber et al., (2020)	Young PD	MTP	geochronology	13.893	65.5	0.64	16.58	3.726	0.07	1.82	4.17	4.65	1.97	0.17	9.519	61.2143	37.44	7.65333	10.0117	6.42067	62.3	41.6707	513.569	12.833	145.666	5.15133	1.37033	2.01367	514.241	16.717	35.441	4.319	18.278	3.79067	1.087	3.14933	0.425333	2.54367	0.482333	1.254	0.184	1.196	0.181667	4.00567	0.371667	8.00067	3.66867
	GW-16-09	Weber et al., (2020)	Young PD	BAF13	geochronology	16.5	65.82	0.62	16.44	3.654	0.07	1.81	4.18	4.48	2.05	0.17	10.4337	61.2877	37.7587	7.658	9.163	6.90233	59.9373	42.0597	509.242	12.9857	136.899	4.952	1.238	1.985	490.487	16.0443	34.228	4.17933	17.394	3.58867	1.105	3.24267	0.425333	2.59967	0.475	1.31333	0.184333	1.26267	0.193	3.80267	0.365667	8.72233	3.46667
	GW-16-02	Weber et al., (2020)	Young PD	BAF28	geochronology	31.084	65.78	0.59	17.12	3.474	0.07	1.76	4	4.36	1.81	0.19	9.57267	64.897	44.0347	7.38167	6.31533	9.44233	62.765	33.7103	538.259	13.094	154.169	5.277	0.977667	1.77467	513.176	17.77	36.0717	4.588	18.519	3.754	1.04867	3.18433	0.462333	2.737	0.501	1.39967	0.195	1.40467	0.197667	4.10967	0.414	8.48867	4.71167
	GW-16-01	Weber et al., (2020)	Young PD	BAF37	geochronology	40.607	65.59	0.65	16.9	3.717	0.07	1.74	4.16	4.43	2.04	0.14	11.0717	73.0217	32.1583	7.548	5.373	5.41733	65.3897	36.6263	547.326	13.0347	127.139	4.13733	1.18433	2.03133	476.027	12.9497	27.724	3.34267	13.9167	2.98533	1.002	2.78	0.392333	2.47533	0.483333	1.332	0.192667	1.34033	0.208333	3.61667	0.326333	8.07533	3.68667
	GW-16-01	Weber et al., (2020)	Young PD	BAF37	geochronology	40.607	65.86	0.61	16.93	3.573	0.07	1.74	4.05	4.49	2.09	0.14	10.4417	70.4867	28.218	7.40867	5.85467	5.89433	57.675	38.2383	571.871	13.176	143.847	4.57233	1.15267	1.77933	480.172	14.8807	30.5217	3.813	15.8617	3.232	1.01833	2.972	0.41	2.48333	0.474	1.34933	0.194333	1.31933	0.196667	3.957	0.342	8.52133	3.71833
	GW-16-01	Weber et al., (2020)	Young PD	BAF37	geochronology	40.607	65.73	0.61	16.89	3.582	0.07	1.74	4.06	4.49	2.09	0.14	10.332	70.9307	32.637	7.62467	4.923	3.98333	61.028	39.219	574.293	13.2803	146.465	4.629	1.283	1.754	485.635	14.8793	30.4673	3.839	15.9933	3.28833	1.08067	2.872	0.410333	2.477	0.466	1.35167	0.185667	1.32167	0.199333	3.87	0.345	8.62267	3.68367
	GW-16-01	Weber et al., (2020)	Young PD	BAF37	geochronology	40.607	63.64	0.68	17.96	4.059	0.07	2.09	4.71	4.73	1.78	0.16	11.8313	84.497	37.8563	9.161	9.13	6.67567	58.084	32.967	641.597	14.151	137.142	4.66233	1.013	1.56367	426.638	13.876	29.198	3.65867	15.6953	3.46	1.14567	3.04633	0.443	2.67267	0.506667	1.46033	0.207667	1.43567	0.199333	3.612	0.314	8.11133	3.14833
	GW-16-01	Weber et al., (2020)	Young PD	BAF37	geochronology	40.607	63.3	0.68	17.92	4.032	0.07	2.08	4.7	4.51	1.77	0.16	11.9833	84.2473	37.4553	9.38567	9.60067	8.068	63.2693	33.095	637.211	14.0627	134.062	4.49533	0.963	1.572	417.139	13.7363	28.8233	3.62967	15.768	3.47533	1.13967	3.11567	0.429667	2.751	0.518	1.43367	0.215	1.428	0.192	3.648	0.335	8.17133	3.24233
	LP-16-01	Weber et al., (2020)	Recent Nevado	25-32	geochronology	46	66.47	0.49	16.87	2.88	0.06	1.43	4.15	4.75	2.01	0.13	8.92367	54.3607	33.6547	6.055	5.27733	5.47567	50.1447	38.0003	579.953	11.8243	127.595	4.08667	0.697667	1.34767	455.443	15.0453	30.34	3.69367	14.9943	3.135	0.994667	2.69433	0.357	2.19133	0.431	1.218	0.167333	1.20433	0.184	3.48333	0.331667	9.98567	3.48667
	LP-16-04	Weber et al., (2020)	Recent Nevado	25-32	geochronology	46	66.05	0.49	17.2	3.015	0.06	1.56	4.34	4.71	1.97	0.13	9.31733	58.1317	38.5643	6.69	6.53	6.92233	53.913	39.3773	571.029	12.547	139.131	4.33533	1.05867	1.99633	466.657	15.8293	32.3313	3.81	15.6527	3.18533	1.03733	2.747	0.387333	2.42633	0.444	1.28133	0.179667	1.20833	0.177	3.686	0.325333	8.52067	3.724
	LP-16-26	Weber et al., (2020)	Old Nevado	U18	geochronology	360	65.96	0.56	16.85	3.069	0.06	1.9	4.34	4.36	2.2	0.13	11.405	73.799	43.0323	7.33133	13.0317	14.8727	47.481	59.5667	580.584	15.117	139.266	3.88233	1.156	4.592	461.246	16.41	34.299	4.25033	17.893	3.79633	1.085	3.367	0.446	2.86167	0.546	1.54433	0.230333	1.47367	0.224667	3.76467	0.335667	8.23767	4.681
	GW-16-13	Weber et al., (2020)	Old Nevado	PDC900	geochronology	900	63.5	0.67	18.24	3.942	0.07	1.94	4.35	4.36	1.86	0.22	11.3217	78.242	33.324	7.96747	6.25917	6.32133	59.69	34.5063	608.757	14.3467	156.47	4.95473	0.9871	1.57303	441.95	14.855	30.929	4.0657	17.5947	3.78033	1.19067	3.33867	0.450267	2.8111	0.549967	1.5116	0.217833	1.46117	0.218033	4.2549	0.368933	8.69147	4.07207
	LP-16-14	Weber et al., (2020)	Domes	U16	geochronology	970	63.04	0.49	18.11	3.249	0.06	3.33	4.75	4.74	1.71	0.04	9.593	67.514	267.572	13.2067	118.931	7.648	39.5243	19.7593	756.554	8.34467	108.457	3.236	0.8815	0.225667	439.26	12.8077	31.3383	3.10633	12.612	2.458	1.05433	2.00833	0.284	1.72533	0.315	0.873	0.127667	0.982	0.122333	2.951	0.267333	8.13267	3.67033
	LP-16-21	Weber et al., (2020)	Domes	U15 Gordo	geochronology	1000	65.77	0.55	16.87	3.348	0.06	1.65	4.36	4.63	2	0.13	9.092	63.0937	33.8883	7.169	5.215	5.51567	55.3427	40.0623	592.903	12.707	133.972	4.417	1.15233	1.76267	486.678	15.1637	30.8053	3.78233	15.8473	3.16167	1.05333	2.74733	0.391	2.37433	0.454667	1.294	0.173667	1.29933	0.189	3.47867	0.311667	8.02333	3.25733
	LP-16-20	Weber et al., (2020)	Domes	U7	geochronology	1400	63.64	0.61	17.29	3.861	0.08	2.62	4.69	4.48	1.87	0.16	12.0037	76.071	153.478	14.8487	67.7857	11.0293	54.6917	34.795	685.279	17.034	127.501	4.02633	0.565333	0.970667	426.331	20.3747	35.7403	5.243	22.201	4.479	1.293	3.846	0.508333	3.22833	0.596	1.65333	0.236	1.57033	0.235667	3.336	0.302333	7.81167	3.59167
	LP-16-13	Weber et al., (2020)	Old Nevado	U6	geochronology	1400	60.32	0.68	17.46	4.626	0.08	3.2	6.26	4.4	2.01	0.22	15.0817	109.341	64.5977	14.8733	15.964	14.711	56.446	41.115	783.906	16.461	135.701	3.757	0.801333	1.089	540.514	23.724	50.4153	6.30267	26.2907	5.277	1.51333	4.283	0.554	3.19567	0.590333	1.55267	0.231	1.54	0.229667	3.63033	0.269	8.17633	4.79667
	LP-16-22	Weber et al., (2020)	Old Nevado	U5	geochronology	1500	61.05	0.69	19.11	4.275	0.08	2.3	5.63	4.67	1.5	0.14	13.3113	94.5947	49.0783	12.8073	14.542	8.14667	55.9827	23.659	635.168	17.9703	130.681	3.81833	0.643667	0.935333	382.625	16.7407	33.39	4.24367	17.733	3.863	1.24267	3.613	0.504667	3.27167	0.637667	1.78	0.26	1.774	0.270333	3.506	0.261	8.366	3.55733
	LP-16-29	Weber et al., (2020)	Domes	U3	stratigraphic	1500	58.94	0.84	16.69	6.3	0.11	4.95	5.71	3.89	1.47	0.16	18.5377	135.203	187.839	24.9617	117.792	21.6753	72.1707	26.5917	511.616	16.3493	116.684	3.47733	0.713667	0.788333	309.866	11.594	25.7233	3.47933	15.0667	3.48	1.11067	3.34333	0.490333	3.12967	0.612667	1.77467	0.256333	1.70033	0.250667	3.107	0.245333	6.816	2.507
	GW-16-13	Weber et al., (2020)	Old Nevado	PDC Coatepec	stratigraphic	900	65.03	0.51	17.89	3.078	0.06	1.49	4.83	4.92	1.7	0.14	8.96167	53.266	35.4807	6.32833	8.11067	4.39467	128.279	32.7533	630.787	10.862	122.72	4.17233	0.847333	1.58333	446.296	13.4897	28.7403	3.43567	14.315	2.93467	1.05833	2.592	0.332333	2.02333	0.402	1.05133	0.158667	1.07	0.150667	3.261	0.285	8.042	2.60067
	LP-16-23	Weber et al., (2020)	Recent Nevado	U27	stratigraphic	50	62.78	0.56	17.69	3.663	0.07	2.51	5.56	4.67	1.66	0.15	11.365	76.6597	74.5767	10.7237	22.945	8.52133	51.1287	29.226	734.278	12.766	112.181	3.47767	1.04267	1.47567	384.501	12.625	27.1597	3.44967	14.8423	3.086	1.08633	2.8	0.371333	2.441	0.444	1.232	0.187333	1.19933	0.191667	2.99233	0.260667	7.97967	2.62067
	GW-16-10	Weber et al., (2020)	Young PD	BAF below MTP	stratigraphic	15	65.75	0.6	17.53	3.546	0.07	1.81	3.9	4.32	1.76	0.21	9.49533	66.66	44.7763	7.331	7.203	8.56633	61.3333	32.7877	512.524	13.1347	155.752	5.41333	0.956667	1.77367	527.392	17.4487	35.5193	4.92333	19.613	4.152	1.07833	3.43133	0.466333	2.89033	0.523333	1.47033	0.206333	1.488	0.213667	4.212	0.419333	8.351	4.938
	GW-16-20	Weber et al., (2020)	Young PD	WQ_fall	stratigraphic	110	64.6	0.58	16.55	3.816	0.07	2.51	4.9	4.12	1.85	0.14	12.8103	82.2073	66.614	10.409	18.1317	6.66967	54.786	33.7773	607.046	13.396	110.49	3.62267	0.956667	1.59467	408.249	12.499	26.729	3.37933	14.746	3.16267	0.961667	2.84833	0.416	2.51433	0.506333	1.361	0.201667	1.38167	0.208	3.091	0.280667	8.001	2.70133
	GW-16-21	Weber et al., (2020)	Young PD	WQ_flow	stratigraphic	110	64.85	0.6	17.12	3.591	0.07	1.94	4.84	4.51	1.76	0.14	11.6693	69.1427	41.471	8.04667	11.2127	3.72	56.0063	35.1517	624.417	13.43	113.744	3.98767	0.851667	1.77167	388.847	12.0517	25.9013	3.33567	14.1863	3.09733	1.051	3.00967	0.427667	2.59233	0.497667	1.406	0.204333	1.32733	0.189333	3.20767	0.307667	7.98433	2.59767
	GW-16-23	Weber et al., (2020)	Young PD	FieldGuide	stratigraphic	40	65.25	0.61	16.43	3.681	0.07	1.99	4.4	4.48	2.1	0.15	10.878	75.3427	44.4873	8.27733	9.26	5.874	57.0703	40.6943	553.427	13.6723	135.778	4.51	1.39567	1.86933	485.419	15.377	31.9337	3.91967	16.7483	3.55267	1.05333	3.093	0.424667	2.749	0.509667	1.4	0.212	1.37333	0.201	3.68367	0.326667	8.10633	3.386
	GW-16-29	Weber et al., (2020)	Young PD	BAFtm	stratigraphic	15	65.22	0.61	16.88	3.726	0.07	1.95	4.38	4.17	1.88	0.15	11.379	71.1317	43.38	8.716	10.4253	4.99033	56.577	41.3567	563.962	14.179	124.969	4.24333	0.876333	2.11367	441.135	13.2963	30.1623	3.645	15.3797	3.23567	0.981	3.04833	0.422667	2.71267	0.500667	1.43467	0.195	1.48267	0.209667	3.46233	0.303333	8.09067	3.127
	GW-16-30	Weber et al., (2020)	Young PD	BAF below Grey	stratigraphic	15	65.2	0.6	16.99	3.573	0.07	1.85	4.46	4.62	1.89	0.15	10.124	64.3873	47.605	7.91833	13.4043	5.53233	56.019	38.257	571.259	13.2	135.249	4.54333	1.505	1.91167	469.807	14.798	31.1027	3.809	16.1903	3.436	1.07567	2.94667	0.417	2.54567	0.471	1.309	0.19	1.24533	0.193333	3.61933	0.34	8.818	3.285
	GW-16-31	Weber et al., (2020)	Young PD	Grey BAF	stratigraphic	15	65.74	0.58	16.87	3.429	0.07	1.68	4.37	4.73	1.89	0.15	9.74333	57.7473	36.5693	6.96633	7.04267	4.78867	57.103	38.6367	552.449	12.786	132.6	4.56767	0.983	1.81067	464.925	14.711	30.9213	3.81833	16.2267	3.27233	1.05867	2.99167	0.399	2.40233	0.460667	1.28333	0.176	1.25067	0.183	3.67533	0.330667	8.45733	3.082
	GW-16-32	Weber et al., (2020)	Young PD	BAF below Grey	stratigraphic	15	65.59	0.58	16.66	3.528	0.07	1.98	4.6	4.46	1.89	0.15	11.0363	69.4147	42.7613	7.91267	10.4117	3.47	52.6883	40.069	589.898	13.554	113.001	3.90767	0.857	1.811	403.36	12.3473	26.965	3.40233	14.336	3.25233	1.00833	2.958	0.425333	2.522	0.479667	1.39567	0.194667	1.42033	0.2	3.20767	0.277	8.12633	2.79667
	GW-16-33	Weber et al., (2020)	Young PD	Below MTP	stratigraphic	15	65.59	0.6	17.36	3.546	0.07	1.66	4.07	4.13	1.95	0.16	9.86067	65.774	33.242	7.87267	9.675	4.58967	57.5947	39.3543	493.433	15.208	140.492	4.803	1.02467	2.221	468.277	14.9313	33.1537	3.91367	16.539	3.559	1.04933	3.235	0.450667	2.83	0.545333	1.557	0.226333	1.58967	0.218333	3.885	0.378333	10.4363	3.972
	GW-16-04c	Weber et al., (2019)	Young PD	UTP	geochronology	12.46	65.03	0.67	17.55	3.969	0.07	2.02	4.69	4.43	1.8	0.18	10.6263	66.5367	37.5523	8.648	9.08133	17.127	64.8023	38.862	565.531	13.4557	140.08	4.93467	1.15467	1.83433	536.497	16.101	37.714	4.30167	17.832	3.81433	1.13333	3.412	0.453	2.70867	0.477667	1.29333	0.185	1.20767	0.184667	3.85133	0.352	9.60267	3.464
	GW-16-34	Weber et al., (2019)	Young PD	MTP	geochronology	13.893	65.09	0.58	16.77	3.735	0.08	2.3	4.83	4.19	1.86	0.14	12.1333	78.1517	57.064	9.32033	15.0283	6.725	55.8023	34.9743	602.713	13.7323	115.901	3.76167	0.861	1.77633	408.056	12.5707	26.9297	3.34333	14.3747	3.31233	1.00467	2.915	0.395333	2.547	0.507333	1.42667	0.213	1.46667	0.207	3.133	0.279	8.109	2.75967
	GW-16-35	Weber et al., (2019)	Young PD	MTP	geochronology	13.893	64.76	0.59	16.89	3.717	0.08	2.01	4.84	4.32	1.8	0.15	11.1543	71.835	45.6453	8.503	14.5423	8.11333	53.6897	44.0533	637.971	13.9117	107.25	3.85033	1.33233	2.67733	398.61	12.2227	26.4653	3.31667	14.3617	3.147	1.04733	2.98067	0.411333	2.64333	0.516667	1.37733	0.194	1.44467	0.207667	3.042	0.278333	7.31867	2.586
	GW-16-03b	Weber et al., (2019)	Young PD	LTP	geochronology	26.011	59.97	0.8	19.68	4.869	0.07	2.55	5.08	3.83	1.53	0.28	14.1007	102.86	52.0777	10.3117	12.9257	7.56367	65.7637	26.2107	571.137	16.2253	176.092	5.88067	0.813667	1.17433	407.831	15.3623	31.7263	4.40033	18.4343	4.23967	1.22367	3.76733	0.542667	3.43633	0.634	1.72833	0.238667	1.65367	0.234	4.75467	0.43	9.88567	4.33833
	GW-16-03c	Weber et al., (2019)	Young PD	LTP	geochronology	26.011	60.2	0.81	20.67	4.851	0.07	2.43	4.78	3.57	1.37	0.29	14.057	102.792	55.023	11.0143	14.327	6.49733	73.092	30.067	633.218	16.0767	172.556	5.62433	1.00867	1.31033	462.04	15.6397	31.393	4.388	18.8247	4.157	1.26833	3.802	0.522333	3.38967	0.629333	1.67933	0.239	1.64033	0.238	4.668	0.421333	10.145	4.40067
	GW-16-03a	Weber et al., (2019)	Young PD	LTP	geochronology	26.011	61.92	0.74	19.4	4.509	0.07	2.28	4.65	3.83	1.55	0.23	12.903	92.043	47.888	9.351	11.6323	7.46967	67.7403	30.149	569.564	15.3483	165.53	5.36533	0.941667	1.37633	459.827	15.691	30.3957	4.324	18.2557	3.975	1.17767	3.58033	0.506333	3.15167	0.597	1.59	0.236333	1.573	0.224	4.42733	0.390667	9.527	4.14833
	LP-16-18	Weber et al., (2019)	Monogenetic	U23 Sabanillas	geochronology	100	59.57	0.79	15.4	5.031	0.09	6.32	6.69	3.68	1.81	0.23	16.837	118.957	338.422	22.696	101.047	24.466	58.152	28.5117	1087.23	13.972	142.438	3.576	1.23933	0.988333	474.704	22.1987	49.8243	6.42867	27.891	5.21967	1.46933	3.91133	0.488667	2.84133	0.512333	1.40933	0.197667	1.275	0.188333	3.80167	0.225	7.03233	3.675
	LP-16-19	Weber et al., (2019)	Monogenetic	U23 Sabanillas	geochronology	100	60.83	0.76	15.18	4.518	0.08	5.27	6.66	3.8	2.06	0.24	15.7333	110.74	238.823	18.862	61.6707	21.9877	59.0323	35.075	1189.83	13.8233	151.337	3.81863	1.06243	1.22723	514.857	24.2137	53.951	6.99297	28.932	5.51853	1.5097	4.0418	0.4973	2.79517	0.515633	1.3349	0.190067	1.25643	0.184333	3.96897	0.264167	7.45403	4.19993
	LP-16-10	Weber et al., (2019)	Domes	U21 Cu Dome	geochronology	250	64.61	0.54	17.68	3.249	0.06	1.61	4.77	4.86	1.69	0.15	9.57727	56.8347	35.904	6.92163	7.45203	3.9178	56.0833	32.408	624.49	12.2313	127.493	4.3503	1.00103	1.51887	453.02	14.427	30.1997	3.70877	15.2953	3.15803	1.1902	2.85507	0.393367	2.34467	0.457733	1.18387	0.1719	1.19727	0.164667	3.43673	0.3181	8.52317	2.9452
	GW-16-06	Weber et al., (2019)	Monogenetic	U17 Tlacotepec	geochronology	860	55.71	1.04	15.57	6.156	0.1	5.63	6.82	4.89	2.43	0.7	15.7337	99.5603	259.382	25.616	148.708	32.159	95.6793	28.2957	1414.18	14.3107	171.569	13.3987	0.691333	0.467667	855.119	55.9467	107.828	12.372	46.2893	7.079	1.80033	4.79267	0.534333	2.962	0.523	1.38467	0.178667	1.23533	0.171	4.44633	0.69	10.488	3.955
	LP-16-16	Weber et al., (2019)	Monogenetic	Texcaltitlán North	-	-	54.71	0.79	15.33	6.543	0.11	9.24	7.07	3.59	1.68	0.3	20.5133	139.913	441.161	34.3933	292.02	32.294	64.709	28.0577	762.7	15.564	114.84	4.03467	0.98	1.10467	459.07	23.638	48.7193	6.05733	24.524	4.432	1.25167	3.76033	0.499	3.08367	0.580333	1.55767	0.215667	1.51233	0.220333	3.08067	0.241	6.62267	2.91733
	LP-16-17	Weber et al., (2019)	Monogenetic	Texcaltitlán South	-	-	54.36	0.95	14.85	6.768	0.11	8.98	6.91	3.8	1.98	0.61	20.2293	145.279	450.417	34.845	286.644	37.5157	90.5673	28.095	1044.81	15.8213	143.445	9.91133	1.15433	1.029	614.991	42.2343	79.383	8.74333	32.8067	5.10533	1.394	3.97867	0.498667	3.01667	0.571333	1.58133	0.223	1.492	0.206667	3.839	0.506	8.91767	4.13267
	GW18-24	this study	Young PD	Young Surge	geochronology	3.7	63.88	0.71	17.21	4.104	0.08	2.56	4.6	4.53	1.89	0.15	12.0536	86.0516	-	11.8295	40.0293	14.6965	80.8375	37.0149	754.494	17.0118	169.812	5.28404	1.10455	1.88611	548.467	20.8809	42.3843	5.72803	23.9944	4.93823	1.38383	4.21791	0.58042	3.30498	0.646094	1.76706	0.242237	1.55969	0.233097	4.5793	0.352848	10.489	4.228
	LP16-30	this study	Monogenetic	Tenango	geochronology	8.5	61.8	0.74	16	5.13	0.09	4.73	6.09	3.79	1.73	0.17	17.8302	128.373	-	21.3296	50.9976	17.7446	73.8585	29.4479	663.792	16.101	138.318	4.03625	0.908898	1.21036	420.353	13.8509	30.4573	3.96787	17.1908	3.76361	1.14578	3.36999	0.521843	2.97564	0.597248	1.69616	0.238691	1.56354	0.237062	3.68214	0.259803	7.20743	2.96071
	GW18-47	this study	Recent Nevado	U34 Ombligo	geochronology	9	64.36	0.52	17.6	3.231	0.06	1.89	4.92	4.8	1.72	0.14	9.0173	66.4301	-	9.56503	20.1853	12.5972	62.8967	32.6601	761.633	12.2016	125.493	4.00985	0.902294	1.20831	453.218	15.232	30.3119	3.80272	16.0603	3.23389	1.21411	2.84889	0.414863	2.26847	0.454794	1.27007	0.177692	1.17146	0.17004	3.56367	0.278909	8.69995	3.17856
	GW-16-04a	this study	Young PD	UTP	geochronology	12.46	63.404	-	-	-	-	-	-	-	-	-	10.805	72.2763	43.169	9.64	10.7043	8.10833	73.292	41.21	664.55	13.9377	141.268	5.16933	1.18367	1.94433	532.468	16.7343	37.485	4.36333	18.4543	3.92367	1.22133	3.35333	0.464667	2.81733	0.528667	1.4	0.186333	1.30633	0.177667	3.703	0.366667	9.33133	3.45733
	GW-16-04b	this study	Young PD	UTP	geochronology	12.46	63.7717	-	-	-	-	-	-	-	-	-	10.3683	64.9607	364.392	8.882	9.47733	14.1017	64.1157	39.1567	562.269	13.2883	136.969	4.83433	1.18933	1.83867	480.996	15.8057	33.1673	4.12833	17.344	3.63133	1.073	3.07	0.425333	2.64233	0.47	1.29033	0.181333	1.23867	0.16	3.52167	0.328333	8.96833	3.26
	GW18-07A	this study	Young PD	UTP	geochronology	12.46	65.08	0.66	17.41	3.798	0.07	1.82	4.33	4.46	1.87	0.19	9.71838	67.2003	-	8.62237	8.64221	8.44457	80.7784	42.9397	585.787	14.1599	168.033	5.60434	1.15438	2.13243	576.225	17.742	38.7312	4.76282	19.241	3.98779	1.21236	3.40367	0.493388	2.73073	0.502539	1.39276	0.186585	1.2832	0.182416	4.48287	0.37703	10.8464	3.95637
	GW18-07B	this study	Young PD	UTP	geochronology	12.46	64.51	0.66	17.63	3.78	0.07	1.77	4.28	4.5	1.85	0.18	9.75581	65.9629	-	9.09003	9.59636	10.7768	82.2504	41.8646	603.434	14.9271	176.948	5.76204	1.32841	2.07056	603.771	17.8731	39.2859	4.71841	19.8035	4.19125	1.30583	3.60782	0.503752	2.91371	0.554502	1.42961	0.198194	1.32205	0.191396	4.80311	0.40585	10.9768	4.17775
	GW18-07C	this study	Young PD	UTP	geochronology	12.46	66.53	0.63	17.14	3.645	0.07	1.72	4.2	4.58	1.98	0.18	9.41182	66.7854	-	8.30658	8.97772	10.0585	73.2109	45.7727	561.293	13.9823	164.094	5.74997	1.33166	2.2569	584.273	18.0944	37.6995	4.7829	19.4885	3.98988	1.22268	3.32958	0.48291	2.66436	0.478171	1.34989	0.181851	1.22871	0.183439	4.35724	0.396787	10.6961	3.98061
	GW18-11D	this study	Young PD	MTP	geochronology	13.893	64.08	0.69	18.35	3.834	0.07	1.85	4.83	4.47	1.56	0.12	11.3506	69.2161	-	8.44	10.423	9.8674	69.2435	38.1278	686.055	14.1774	139.016	4.71325	0.680328	2.14906	431.733	12.7748	28.6941	3.55587	14.9511	3.3046	1.17699	3.14204	0.454254	2.73497	0.535743	1.45939	0.212668	1.46319	0.212757	3.85138	0.303602	9.07053	2.98245
	GW18-05	this study	Young PD	BAF U	geochronology	28	66.66	0.5	17.57	2.925	0.06	1.45	4.41	4.91	1.89	0.14	8.55489	59.2311	-	7.15333	7.80245	6.79472	65.9772	39.6854	680.077	12.689	145.543	4.74804	1.00126	1.57941	519.262	15.1824	31.4279	3.82774	15.113	3.26607	1.15677	2.7177	0.411097	2.35694	0.45972	1.32953	0.18495	1.34668	0.195989	3.89023	0.350827	10.1349	3.68549
	GW18-02	this study	Young PD	BAF28	geochronology	31.084	67.31	0.61	16.23	3.645	0.07	1.87	3.94	4.52	2.09	0.16	11.8085	78.4971	-	8.77283	9.58344	4.87602	75.411	46.9826	554.168	15.8517	177.043	5.94375	1.02261	1.60998	617.581	19.0977	39.6316	4.63489	19.5353	4.21375	1.17191	3.55589	0.517717	3.14393	0.59686	1.70411	0.232766	1.66821	0.237288	4.86081	0.431924	11.9549	4.85644
	GW18-30	this study	Young PD	BAF28	geochronology	31.084	63.3	0.55	17.99	3.357	0.06	2.14	5.3	4.77	1.68	0.15	9.81099	81.0998	-	10.4147	33.109	7.65407	61.8063	35.2638	856.522	12.0764	127.074	4.41617	1.11284	1.77244	505.535	15.8502	35.866	4.36977	17.4076	3.7196	1.28135	3.0595	0.402533	2.34858	0.441227	1.2281	0.164789	1.25298	0.166741	3.34303	0.268705	9.25654	3.00182
	GW18-04	this study	Young PD	BAF37	geochronology	40.607	64.58	0.58	17.94	3.312	0.07	1.53	4.67	4.64	1.85	0.13	9.37332	65.7418	-	7.68452	5.79177	15.9005	71.9441	35.1511	712.398	12.7061	134.006	4.04815	0.912443	2.05556	475.462	13.2225	28.7645	3.37958	13.7662	3.06741	1.16894	2.73463	0.405905	2.35437	0.481158	1.29659	0.196886	1.3176	0.204162	3.7516	0.30502	nd	3.56577
	GW18-04(2)	this study	Young PD	BAF37	geochronology	40.607	64.39	0.58	17.94	3.321	0.07	1.54	4.67	4.63	1.84	0.13	8.83638	64.9393	-	7.53325	5.24055	13.1867	68.5481	33.968	690.183	12.1327	129.318	3.87431	1.0356	2.01423	456.917	12.7423	27.539	3.23905	13.0798	2.86015	1.13853	2.59722	0.375178	2.32534	0.465522	1.29044	0.192437	1.24366	0.189898	3.57196	0.299605	nd	3.41606
	GW18-31	this study	Young PD	BAF37 Pyro sequence	geochronology	40.607	65	0.63	17.28	3.852	0.07	2.15	4.84	4.52	1.93	0.16	11.9194	89.2379	-	10.7587	12.5809	12.7925	71.8283	41.5751	660.783	14.8872	147.591	5.01477	1.36214	1.86107	521.283	16.0655	34.2394	4.39606	18.2087	3.82065	1.24988	3.58567	0.480331	2.85945	0.561626	1.51038	0.207664	1.42228	0.209703	4.0156	0.329447	9.11158	3.5638
	GW18-13	this study	Young PD	Pink Pumice	geochronology	46.352	65.18	0.65	17.7	3.789	0.07	1.71	4.48	4.25	2.13	0.16	12.0378	73.9725	-	8.52903	12.8934	9.17373	66.2007	45.5704	593.21	16.7309	146.868	4.97254	1.07284	2.26299	494.195	15.2565	32.1857	4.16365	17.7527	3.83091	1.19033	3.57075	0.528984	3.12085	0.611584	1.70352	0.228817	1.63727	0.243699	4.00475	0.349592	9.75935	3.79888
	LP16-03	this study	Recent Nevado	U25	geochronology	50	65.54	0.54	17.4	3.24	0.06	1.73	4.54	4.69	1.87	0.14	10.2082	71.6668	-	8.29965	8.19929	9.43089	72.2901	39.1905	635.815	14.2334	153.703	4.7999	0.85599	1.53766	503.232	17.6621	35.4085	4.35443	17.5849	3.74915	1.19471	3.2465	0.463859	2.67414	0.52855	1.53086	0.208022	1.4107	0.21427	4.2243	0.34195	11.4745	4.09401
	LP16-07	this study	Recent Nevado	U29	geochronology	50	66.11	0.53	17.57	3.123	0.06	1.64	4.53	4.79	1.89	0.15	9.1282	77.6282	-	7.59471	9.88967	13.3235	65.8165	40.4998	633.297	12.3887	156.943	5.0327	0.894725	1.0781	532.477	15.7898	34.1166	3.80885	16.0687	3.22572	1.21206	2.71283	0.424916	2.45856	0.477773	1.36146	0.186516	1.33142	0.185412	4.07962	0.35884	10.2644	3.78731
	LP16-23	this study	Recent Nevado	U27	geochronology	50	62.61	0.58	17.68	3.735	0.07	2.54	5.5	4.64	1.65	0.15	11.9751	84.035	-	12.0143	26.5193	12.6872	65.1934	31.252	796.643	13.8018	126.022	3.84134	0.977425	1.56699	429.747	13.8499	29.4684	3.80926	15.8906	3.52229	1.23918	3.06465	0.439961	2.73267	0.538387	1.42197	0.192415	1.35157	0.2009	3.5226	0.274107	10.223	2.9044
	GW18-39	this study	Recent Nevado	U32	geochronology	50	64.61	0.62	16.59	3.672	0.07	2.51	4.72	4.5	1.98	0.18	-	-	-	-	-	-	-	-	-	-	-	-	-	-	-	-	-	-	-	-	-	-	-	-	-	-	-	-	-	-	-	-	-
	GW18-40	this study	Recent Nevado	U32	geochronology	50	64.77	0.59	17.57	3.483	0.07	2.3	4.93	4.59	1.87	0.18	-	-	-	-	-	-	-	-	-	-	-	-	-	-	-	-	-	-	-	-	-	-	-	-	-	-	-	-	-	-	-	-	-
	GW18-41	this study	Recent Nevado	U31	geochronology	50	64.04	0.55	18.08	3.339	0.06	2.39	5.27	4.78	1.78	0.17	-	-	-	-	-	-	-	-	-	-	-	-	-	-	-	-	-	-	-	-	-	-	-	-	-	-	-	-	-	-	-	-	-
	GW18-42	this study	Recent Nevado	U31	geochronology	50	64.17	0.51	18.31	3.114	0.06	1.58	5.02	4.99	1.59	0.14	-	-	-	-	-	-	-	-	-	-	-	-	-	-	-	-	-	-	-	-	-	-	-	-	-	-	-	-	-	-	-	-	-
	GW18-43	this study	Recent Nevado	U30	geochronology	50	63.26	0.48	18.39	2.997	0.06	2.07	5.45	4.75	1.68	0.15	-	-	-	-	-	-	-	-	-	-	-	-	-	-	-	-	-	-	-	-	-	-	-	-	-	-	-	-	-	-	-	-	-
	GW18-48	this study	Old Nevado	U24	geochronology	120	64.02	0.56	17.97	3.51	0.07	2.54	5.39	4.8	1.7	0.16	10.5874	71.7041	-	10.8406	42.5661	15.819	67.3761	32.7039	849.519	13.626	138.478	3.93879	0.8325	1.54204	466.83	15.7931	33.0922	4.27822	18.1066	3.88894	1.33325	3.45675	0.468861	2.66588	0.521425	1.42832	0.189157	1.32226	0.187179	3.65667	0.265692	8.53698	3.12147
	GW18-50	this study	Domes	U9	geochronology	1440	60.84	0.67	17.74	4.635	0.09	2.91	5.81	4.37	1.98	0.21	14.5621	111.559	-	16.0929	18.5007	16.3717	70.7999	45.3001	768.934	17.4282	154.768	4.16301	0.657989	1.51489	556.622	23.1839	48.3728	6.23552	26.0223	5.2228	1.53155	4.3499	0.589677	3.38939	0.665158	1.82114	0.247266	1.68268	0.257053	4.09507	0.282096	9.59176	4.90768
	LP16-09	this study	Domes	U21	geochronology	250	61.52	0.72	16.84	4.923	0.09	4.09	6.02	3.99	1.79	0.17	16.8935	115.242	-	17.5507	12.6844	9.67941	72.053	32.735	762.119	15.2105	134.161	4.32118	0.922203	0.985953	493.514	15.8123	36.29	4.63835	19.5517	4.21625	1.29737	3.49297	0.496043	2.99627	0.579001	1.59587	0.215919	1.54735	0.220687	3.70916	0.299617	9.14484	3.24475
	GW16-07	this study	Monogenetic	U17 Tlacotepec	geochronology	860	55.56	1.05	15.69	6.3	0.1	5.8	6.46	4.52	2.35	0.71	15.5042	137.88	-	29.0844	268.115	26.6977	168.933	31.5003	1469.08	15.004	187.911	14.3515	0.898745	0.908263	940.651	60.0553	114.918	13.3227	49.1878	7.50817	1.97248	5.00133	0.603776	3.16953	0.538832	1.45263	0.190764	1.34362	0.181637	4.84519	0.675883	12.5106	4.19059
	GW18-52	this study	Old Nevado	BAF970	geochronology	970	62.83	0.61	19.4	3.438	0.06	1.49	5.28	4.88	1.44	0.15	9.75133	71.6959	-	8.4422	5.57129	10.8999	66.5109	20.106	801.298	14.2314	138.364	4.44987	0.519703	1.65424	506.735	15.8756	32.715	4.13412	17.0806	3.86504	1.30068	3.15446	0.466866	2.58373	0.540836	1.48984	0.208879	1.49852	0.202594	3.75452	0.32114	10.3921	3.28259
	LP16-28	this study	Domes	U14 Dome Te	geochronology	1000	65.43	0.24	19.46	1.548	0.03	0.66	4.89	5.61	1.58	0.1	5.07962	36.9173	-	4.76604	13.0449	7.16947	32.989	35.4797	1102.27	7.29589	117.878	2.59532	0.460838	1.18831	473.473	16.4609	32.2136	3.5551	13.1468	2.61126	1.08806	1.84729	0.237604	1.40447	0.248724	0.756404	0.102355	0.820426	0.142594	3.25128	0.25367	14.141	3.95073
	GW18-28	this study	Domes	U15 La Galera	geochronology	1000	65.45	0.24	19.48	1.557	0.03	0.67	4.89	5.56	1.57	0.1	5.13894	37.0091	-	4.73628	11.5385	16.4588	35.6146	35.0548	1084.1	7.03207	115.317	2.7894	0.323486	1.32894	452.456	15.9871	31.191	3.44881	12.1377	2.34079	1.09	1.60056	0.216886	1.32204	0.247621	0.717779	0.0999023	0.786485	0.11762	3.03504	0.25393	10.8518	3.93097
	GW18-28(2)	this study	Domes	U15 La Galera	geochronology	1000	62.03	0.64	18.68	4.176	0.09	2.17	4.7	4.61	1.96	0.2	12.8991	91.8235	-	15.7292	43.3566	19.6728	66.6408	43.8146	889.255	15.2444	167.972	4.82627	0.865121	1.56302	604.337	23.0288	55.8759	6.48391	26.6576	5.41355	1.54297	4.17558	0.583706	3.236	0.616787	1.71576	0.235437	1.57251	0.232457	4.37187	0.3283	9.76337	4.51814
	GW18-33	this study	Domes	U15 Las Palomas	geochronology	1000	63.14	0.58	18.92	3.906	0.09	1.05	4.68	4.59	1.93	0.14	12.4515	108.98	-	15.141	34.2117	14.3442	58.0571	37.7245	713.184	17.2582	124.522	3.66205	0.656099	1.43065	440.186	19.9553	34.6141	5.74716	24.4388	5.32895	1.49306	4.39282	0.626229	3.66665	0.699167	1.85133	0.257737	1.87944	0.255638	3.60783	0.286436	8.93742	4.13092
	LP16-25	this study	Old Nevado	U13	geochronology	1100	65.66	0.58	17.15	3.474	0.06	2.06	4.74	4.53	2	0.17	11.0607	80.8864	-	10.4386	16.4789	16.7235	77.0086	45.9762	719.234	16.5769	156.207	4.27559	0.59722	1.62755	477.68	20.3858	43.2893	5.40269	22.0889	4.37153	1.26241	3.74147	0.536492	3.08435	0.598667	1.65463	0.245556	1.62189	0.247189	4.11105	0.295815	9.14593	4.99761
	LP16-27	this study	Old Nevado	U12	geochronology	1250	63.2	0.61	18.46	3.762	0.09	2.02	4.95	4.61	1.75	0.15	11.1191	77.6484	-	10.2358	8.05266	14.1953	69.8665	48.8066	672.411	13.6426	157.074	4.49556	0.791439	2.58026	549.096	17.6754	43.0851	4.52413	18.3344	3.77002	1.25398	3.14331	0.46442	2.67054	0.523856	1.46114	0.197886	1.39258	0.200471	4.1845	0.31949	9.9027	4.9205
	GW18-53	this study	Domes	U8	geochronology	1400	64.42	0.49	17.63	3.6	0.07	2.47	4.9	4.91	2.08	0.15	10.4297	77.6962	-	12.1377	29.2116	15.053	62.5466	49.276	697.152	13.6172	145.097	3.65539	1.08423	2.75632	524.853	18.5433	37.886	4.69533	18.0508	3.72259	1.14543	3.16336	0.459105	2.59403	0.500848	1.41107	0.202202	1.33494	0.209804	3.84059	0.285619	11.568	5.34157
	LP16-24	this study	Old Nevado	U5 Raices	geochronology	1500	61.66	0.64	18.52	3.906	0.08	2.13	5.63	4.71	1.65	0.14	12.0764	90.2205	-	12.6256	13.9992	12.4476	62.3436	34.3465	664.375	22.6997	134.476	3.69336	0.630819	0.886847	392.602	20.7077	37.5356	5.23958	21.1243	4.69477	1.32807	4.4377	0.647372	3.89595	0.771298	2.24433	0.306985	2.10049	0.316085	3.66995	0.254222	9.03702	3.60958
	GW18-54	this study	Old Nevado	U4	geochronology	1500	62.93	0.53	18.66	3.456	0.06	1.79	5.22	4.86	1.82	0.15	10.1668	71.7553	-	9.59097	7.18683	11.6858	64.832	44.1003	712.619	13.221	138.751	4.0129	0.677685	1.31387	500.333	17.1138	35.6398	4.20798	17.0686	3.54468	1.21571	2.94757	0.439616	2.5409	0.487398	1.43254	0.197515	1.30185	0.192505	3.7201	0.266141	9.65675	4.33078
	GW18-26	this study	Pre Nevado	U2	-	-	58.36	0.79	15.48	5.805	0.11	7.46	6.65	3.29	1.16	0.18	20.1806	143.263	-	27.3925	108.08	25.41	72.6096	14.9603	970.791	15.2866	117.73	3.61311	0.641479	0.588618	370.501	16.1453	33.2609	4.37071	18.5216	3.70687	1.16397	3.33935	0.47805	2.8232	0.561225	1.56362	0.20977	1.50928	0.219913	3.26265	0.224342	5.35094	2.37136
	GW18-29	this study	Pre Nevado	U2	-	-	64.67	0.66	16.15	4.14	0.08	3.3	5.36	4.22	1.56	0.16	15.2339	110.362	-	14.5873	39.741	15.9942	63.4619	24.4925	814.215	13.9705	126.89	3.31119	0.627154	0.8826	327.492	11.0232	23.5486	3.15921	13.6772	3.12648	0.986326	2.87589	0.434226	2.64333	0.53745	1.44469	0.202519	1.39526	0.205345	3.43233	0.232753	5.12425	2.11598
	GW18-27	this study	Pre Nevado	U1	-	-	59.44	0.7	21.11	4.041	0.09	1.92	5.49	4.63	1.46	0.19	11.6982	73.9883	-	9.31558	10.2716	9.09083	75.904	22.1111	932.482	13.758	161.216	4.04554	0.625617	0.976697	432.055	16.0867	34.4444	4.21167	17.8386	3.91979	1.24953	3.40345	0.462294	2.68531	0.504243	1.39204	0.192713	1.29636	0.194098	4.32936	0.279802	9.18456	3.91098
	GW18-08	this study	Domes	U3	stratigraphic	1500	63.72	0.62	17.82	3.933	0.08	1.9	4.62	4.77	1.89	0.16	11.0938	83.1814	-	12.4971	24.0238	13.7802	65.0436	43.7374	649.132	14.9834	156.479	4.68356	0.797213	1.08146	527.115	17.6423	39.817	4.8418	19.5237	4.1555	1.33136	3.39172	0.51137	2.93538	0.565203	1.61438	0.228232	1.55843	0.231036	4.07325	0.321508	10.6595	4.52534
	GW18-44	this study	Old Nevado	U19	stratigraphic	400	63.71	0.58	17.46	3.591	0.07	2.3	5.09	4.62	1.78	0.16	10.6375	85.0037	-	9.76107	30.1011	9.58325	67.8467	33.4824	806.079	13.6708	140.779	4.32395	1.4061	1.40177	489.172	16.0631	34.7394	4.33973	18.3052	3.82922	1.31719	3.20181	0.465124	2.67726	0.518335	1.39279	0.182919	1.29557	0.191904	3.76049	0.271664	8.90242	3.25296
	GW18-45	this study	Old Nevado	U19	stratigraphic	400	63.25	0.5	19.08	3.141	0.06	2	5.72	5.14	1.47	0.13	9.63323	68.712	-	9.68441	22.6782	16.9368	63.2235	24.9162	882.109	11.7763	120.097	3.51525	0.847687	1.2509	422.726	25.0632	47.6522	5.4417	20.1671	3.52059	1.42725	2.811	0.405264	2.29206	0.434268	1.15604	0.156529	1.09441	0.162991	3.41532	0.242169	11.7628	4.45411
	GW18-46	this study	Old Nevado	U20	stratigraphic	400	65.21	0.57	17.59	3.384	0.06	1.67	4.62	4.84	1.76	0.16	9.03162	62.5409	-	8.44783	10.9264	12.2998	72.336	38.6801	662.971	12.7453	148.208	5.01904	1.6328	1.96301	520.234	16.4367	34.0176	4.14308	17.1479	3.40395	1.22088	3.00473	0.438072	2.48904	0.464079	1.31166	0.186185	1.17672	0.181185	3.94278	0.344745	9.87375	3.64974
	GW18-37	this study	Recent Nevado	U26	stratigraphic	50	65.87	0.54	17.9	3.078	0.05	1.35	4.65	4.85	1.8	0.13	8.90397	60.8107	-	6.97213	8.67782	9.82457	61.8781	37.4975	694.337	13.5767	137.551	4.10639	0.994306	1.40002	444.356	13.4354	27.0412	3.4774	14.4096	3.00868	1.18491	2.85594	0.419352	2.49672	0.499214	1.44498	0.200839	1.34605	0.20983	3.7331	0.312278	9.1248	3.34844
	GW18-55	this study	Monogenetic	Villa Guerrero Flow	-	-	59.16	0.83	15.59	5.724	0.12	7.73	6.11	3.75	1.24	0.18	17.9368	115.709	-	32.3999	290.829	23.9441	71.0828	20.7641	579.988	36.9472	139.739	4.14765	1.00173	0.877269	382.614	40.2129	45.2313	8.90891	37.3586	7.04456	2.0613	7.07966	0.97291	5.63283	1.14078	3.16467	0.432548	2.81047	0.42525	3.64746	0.261977	5.49257	2.61678
	GW-16-22	this study	Young PD	WQ	stratigraphic	110	68.07	0.58	17.48	3.735	0.08	1.78	4.77	4.3	2.19	0.15	10.1337	65.6483	36.3447	7.21967	6.79633	3.80133	55.198	43.7527	560.801	14.044	126.679	4.47967	1.236	2.28267	505.282	15.1667	31.6293	3.867	15.9047	3.44833	1.06533	3.00267	0.438667	2.75467	0.519	1.448	0.207	1.40967	0.199667	3.42933	0.361333	9.51567	3.83933
	GW-16-23	this study	Young PD	FieldGuideSequence	stratigraphic	40	68.1	0.65	17.43	4.005	0.07	2.25	4.81	4.41	2.18	0.17	10.377	72.8563	45.9243	8.573	9.58833	6.21533	61.536	41.6483	572.503	13.5277	130.511	4.32733	1.20767	1.77367	501.446	15.3913	31.722	3.94767	16.285	3.50867	1.02733	3.188	0.413667	2.67567	0.507667	1.38233	0.191	1.327	0.191333	3.531	0.318333	8.27833	3.26333
	GW-16-24	this study	Young PD	FieldGuide	stratigraphic	40	66.3733	-	-	-	-	-	-	-	-	-	11.4303	78.2563	42.757	8.36867	7.35	6.257	61.003	42.274	588.317	14.3917	141.946	4.648	1.31467	1.84933	520.582	16.2223	33.72	4.144	17.487	3.66467	1.06067	3.26233	0.467333	2.81433	0.541333	1.466	0.207333	1.414	0.216667	3.828	0.338	8.53067	3.535
	GW18-12	this study	Young PD	BAF YR	stratigraphic	15	65.41	0.55	17.97	3.258	0.06	1.58	4.76	4.9	1.74	0.15	8.78705	58.493	-	7.2435	9.0631	6.37861	64.6298	38.7142	679.445	12.8485	143.949	4.76558	1.0807	1.92666	490.178	15.0189	30.999	3.93725	16.1286	3.46731	1.19636	3.04581	0.42274	2.51381	0.473054	1.28295	0.186027	1.17837	0.179086	3.83639	0.32166	11.9066	2.97614
	GW18-16	this study	Young PD	Northern grey BAF	stratigraphic	15	62.88	0.58	18.43	3.564	0.07	2.09	5.51	4.88	1.56	0.14	12.0711	73.9968	-	9.93864	22.488	9.33511	58.56	30.6339	784.145	15.3568	125.211	3.87691	0.816837	1.55626	390.817	14.7667	31.0075	3.95244	15.9911	3.4912	1.24243	3.21847	0.480014	2.767	0.559102	1.60871	0.226111	1.46231	0.229834	3.4173	0.271209	8.22082	2.62903
	1	Weber, G., Simpson, G., & Caricchi, L. (2020). Magma diversity reflects recharge regime and thermal structure of the crust. (under review); Weber, G., Arce, J. L., Ulianov, A., & Caricchi, L. (2019). A Recurrent Magmatic Pattern on Observable Timescales Prior to Plinian Eruptions From Nevado de Toluca (Mexico). Journal of Geophysical Research: Solid Earth, 124(11), 10999-11021.
	2	Stratigraphic placement of units is based on geological mapping of Torres-Orozco et al., (2017) and our own fieldwork.
	3	Geochronological age constraints compiled from Torres-Orzoco et al., (2017); García-Palomo et al., (2002); Macias et al., (1997). The stratigraphic age constraints are highly approximate.
[truncated: 1 more columns]

## Sheet: Plagioclase
	Table S3: Plagioclase compositions.
	Stage	Eruption	Distance from rim	Na2O	K2O	SiO2	CaO	FeO	Al2O3	MgO	Total	An	Ab	Or
			(µm)	(wt.%)	(wt.%)	(wt.%)	(wt.%)	(wt.%)	(wt.%)	(wt.%)	(wt.%)	(mol.%)	(mol.%)	(mol.%)
	Young PD	28 BAF	1	6.68	0.4383	56.98	8.35	0.3945	26.01	0.024	98.9409	0.398374	0.576727	0.0248987
	Young PD	28 BAF	1	6.12	0.3881	56.82	9.19	0.3744	26.35	0.0305	99.3513	0.443382	0.534323	0.022295
	Young PD	28 BAF	1	5.51	0.2165	55.12	10.55	0.3333	27.96	0.0228	99.7583	0.507728	0.479866	0.0124062
	Young PD	28 BAF	17.78	6.02	0.2482	56.3	9.46	0.3258	27.2	0.0056	99.6102	0.458123	0.527566	0.0143118
	Young PD	28 BAF	1	6.25	0.2829	56.81	9.18	0.3068	26.94	0.0041	99.7913	0.440774	0.543053	0.0161736
	Young PD	28 BAF	141.16	5.57	0.2098	55.2	10.5	0.292	28.04	0.0093	99.8391	0.504094	0.483913	0.011993
	Young PD	28 BAF	1	6.42	0.3303	57.04	8.8	0.2841	26.58	0.0163	99.4783	0.422851	0.558251	0.0188979
	Young PD	28 BAF	53.56	5.65	0.1962	54.92	10.76	0.2835	28.28	0.0003	100.122	0.507116	0.481873	0.0110102
	Young PD	28 BAF	88.6	5.88	0.2386	55.83	9.88	0.2835	27.65	0.0118	99.8176	0.474892	0.511452	0.0136556
	Young PD	28 BAF	123.64	5.72	0.2132	54.73	10.49	0.2827	28.01	0	99.4917	0.497276	0.49069	0.012034
	Young PD	28 BAF	36.92	5.49	0.2141	55.17	10.54	0.2733	27.81	0.0046	99.5689	0.508447	0.479255	0.0122977
	Young PD	28 BAF	1	6.11	0.2655	56.63	9.33	0.2658	26.89	0.0108	99.5245	0.45066	0.53407	0.0152698
	Young PD	28 BAF	71.08	6.7	0.2879	57.55	8.52	0.2637	26.29	0.0184	99.6673	0.40596	0.577707	0.0163337
	Young PD	28 BAF	18.96	6.44	0.3072	57.36	8.88	0.2622	26.45	0.0165	99.7545	0.424885	0.557614	0.0175017
	Young PD	28 BAF	69.85	6.15	0.2376	56.45	9.55	0.2601	27.14	0	99.8248	0.455584	0.53092	0.0134962
	Young PD	28 BAF	36.04	5.88	0.2375	55.78	9.95	0.2597	27.54	0	99.6936	0.476683	0.509769	0.0135479
	Young PD	28 BAF	106.12	6.14	0.2291	56.27	9.58	0.2587	27.35	0.0021	99.8684	0.456976	0.530012	0.0130123
	Young PD	28 BAF	18.52	6.09	0.2536	56.69	9.61	0.2554	27.32	0.0185	100.263	0.459093	0.526482	0.0144254
	Young PD	28 BAF	77.5	5.42	0.1947	54.89	10.76	0.2455	28.47	0	100.031	0.517307	0.471547	0.0111456
	Young PD	28 BAF	1	6.16	0.2586	55.45	9.55	0.2427	27.03	0.0186	98.7231	0.454649	0.530692	0.0146589
	Young PD	28 BAF	54.55	6.12	0.2498	56.48	9.71	0.2382	27.35	0.02	100.226	0.460575	0.525317	0.0141083
	Young PD	28 BAF	51.34	6.04	0.2407	56.16	9.42	0.2372	27.2	0	99.3279	0.456467	0.529645	0.0138879
	Young PD	28 BAF	62.2	5.83	0.2394	55.92	9.78	0.2371	27.41	0.0009	99.4631	0.474408	0.511765	0.0138273
	Young PD	28 BAF	85.15	5.14	0.187	54.4	11.26	0.2349	28.93	0	100.169	0.541759	0.447528	0.010713
	Young PD	28 BAF	1	5.84	0.2368	55.81	10.07	0.2291	27.5	0.0118	99.757	0.481353	0.505169	0.0134777
	Young PD	28 BAF	46.9	6.15	0.2496	56.46	9.53	0.2266	27.29	0.0027	99.9192	0.454754	0.531065	0.0141817
	Young PD	28 BAF	17.9	5.57	0.2076	55.11	10.45	0.2249	28.05	0	99.62	0.502965	0.485138	0.0118973
	Young PD	28 BAF	193.72	6.94	0.319	58.44	8.03	0.223	25.94	0.0124	99.9342	0.382953	0.598933	0.0181143
	Young PD	28 BAF	34.56	6.46	0.2737	57.33	8.83	0.2216	26.82	0	99.9897	0.423581	0.560786	0.0156333
	Young PD	28 BAF	211.24	5.26	0.1836	54.31	11.12	0.2198	28.76	0	99.8947	0.533148	0.456371	0.0104813
	Young PD	28 BAF	92.8	5.67	0.2129	55.53	10.45	0.2186	28.03	0	100.118	0.498471	0.489436	0.0120921
	Young PD	28 BAF	228.76	6.04	0.2526	56.24	9.79	0.2184	27.57	0.0174	100.146	0.465727	0.519965	0.0143081
	Young PD	28 BAF	16.3	6.12	0.2589	56.75	9.43	0.2169	27.06	0.008	99.8536	0.453078	0.532111	0.0148113
	Young PD	28 BAF	18.91	7.43	0.3983	60.05	6.84	0.2169	24.82	0.0195	99.8181	0.329483	0.647672	0.0228448
	Young PD	28 BAF	8.65	6.25	0.2517	56.67	9.49	0.2121	26.96	0.0101	99.8439	0.449766	0.53603	0.0142038
	Young PD	28 BAF	31.6	6.17	0.3132	56.62	9.41	0.2092	27.17	0.0395	99.9616	0.449201	0.532997	0.0178022
	Young PD	28 BAF	39.25	6.24	0.2422	56.78	9.45	0.2086	27.07	0.0074	100.009	0.449348	0.536939	0.0137128
	Young PD	28 BAF	17.88	6.63	0.2945	57.17	8.81	0.1989	26.8	0.0148	99.935	0.416381	0.567046	0.016573
	Young PD	28 BAF	34.76	6.57	0.3117	57.36	8.85	0.1986	26.77	0.0147	100.095	0.419225	0.563194	0.0175809
	Young PD	28 BAF	23.95	6.48	0.2864	57.62	8.9	0.1985	26.61	0.0284	100.153	0.424468	0.559268	0.0162641
	Young PD	28 BAF	36.82	6.71	0.3055	58.11	8.27	0.1949	26.06	0	99.6505	0.398049	0.584443	0.0175082
	Young PD	28 BAF	111.07	5.64	0.2007	54.45	10.67	0.1923	27.92	0.0107	99.0921	0.505321	0.483361	0.0113175
	Young PD	28 BAF	246.28	6.87	0.3155	57.69	8.4	0.1894	26.3	0.006	99.7734	0.396081	0.586206	0.0177135
	Young PD	28 BAF	176.2	6.17	0.244	56.5	9.53	0.1869	27.32	0.0101	99.9734	0.454114	0.532042	0.013844
	Young PD	28 BAF	281.32	6.82	0.3192	57.9	8.39	0.1857	26.21	0.0156	99.8578	0.397409	0.584588	0.0180028
	Young PD	28 BAF	158.68	5.82	0.2215	55.8	10.23	0.1856	27.9	0	100.183	0.486546	0.500911	0.0125436
	Young PD	28 BAF	208.91	5.75	0.1929	54.67	10.33	0.1778	27.73	0.0093	98.9077	0.492725	0.496319	0.0109556
	Young PD	28 BAF	288.3	7.5	0.6192	60.9	6.4	0.175	24.2	0.0202	99.8415	0.309037	0.655362	0.035601
	Young PD	28 BAF	196.68	5.8	0.1962	54.53	10.32	0.174	27.59	0.013	98.6413	0.490274	0.498628	0.0110984
	Young PD	28 BAF	98.84	5.54	0.1829	54.44	10.72	0.169	27.85	0.013	98.9545	0.511374	0.478237	0.0103886
	Young PD	28 BAF	186.68	7.13	0.3519	58.96	7.64	0.1661	25.74	0.0068	99.9961	0.364475	0.615536	0.0199892
	Young PD	28 BAF	13.23	7.6	0.4175	58.97	6.75	0.1655	24.58	0.0049	98.5072	0.321424	0.654904	0.0236718
	Young PD	28 BAF	51.64	7.35	0.3602	59.64	7.26	0.1646	25.2	0	99.9906	0.345885	0.633682	0.0204333
	Young PD	28 BAF	54.73	7.27	0.3478	59.43	7.38	0.1597	25.17	0.0076	99.78	0.352265	0.627968	0.0197671
	Young PD	28 BAF	34.8	7.41	0.4099	59.6	7.04	0.1589	24.91	0.0117	99.5654	0.33624	0.640449	0.0233107
	Young PD	28 BAF	237.6	5.61	0.2146	55.05	10.77	0.1567	28.38	0	100.243	0.508558	0.479376	0.0120658
	Young PD	28 BAF	84.9	7.09	0.2961	59.18	7.73	0.1565	25.74	0	100.197	0.36963	0.613512	0.0168588
	Young PD	28 BAF	220.44	6.03	0.2298	55.98	9.87	0.1562	27.61	0.0042	99.9096	0.468757	0.518248	0.0129952
	Young PD	28 BAF	221.14	5.8	0.2023	54.65	10.22	0.1539	27.62	0.0046	98.6631	0.487672	0.500834	0.0114941
	Young PD	28 BAF	117.7	5.83	0.1958	55.8	9.99	0.1533	27.73	0	99.7526	0.480907	0.50787	0.011223
	Young PD	28 BAF	101.68	6.64	0.2282	57.47	8.96	0.1523	26.82	0	100.302	0.421694	0.565518	0.0127881
	Young PD	28 BAF	68.12	7.14	0.2934	58.91	7.76	0.1515	25.78	0.0175	100.091	0.368995	0.614393	0.0166119
	Young PD	28 BAF	172.22	6.12	0.2265	55.37	9.77	0.1506	27.19	0	98.8517	0.462713	0.524514	0.0127728
	Young PD	28 BAF	215.92	7.88	0.3786	61.13	5.6	0.1505	24.06	0.005	99.208	0.275717	0.702088	0.0221951
	Young PD	28 BAF	233.37	5.8	0.1889	54.64	10.35	0.1504	27.63	0	98.7703	0.491202	0.498123	0.0106746
	Young PD	28 BAF	152.02	6.37	0.2268	57.37	8.98	0.1503	26.86	0.0035	99.9894	0.432201	0.554802	0.0129973
	Young PD	28 BAF	168.8	6.21	0.2271	56.74	9.41	0.15	27.19	0.0028	99.963	0.449848	0.537225	0.0129269
	Young PD	28 BAF	237.32	5.96	0.2296	56.1	9.94	0.15	27.66	0.018	100.067	0.473361	0.51362	0.013019
	Young PD	28 BAF	316.36	6.71	0.2941	57.95	8.31	0.1493	26.37	0	99.8062	0.399466	0.583701	0.0168335
	Young PD	28 BAF	74.38	5.78	0.1911	54.89	10.27	0.1491	27.71	0	99.0266	0.490047	0.499096	0.0108575
	Young PD	28 BAF	185.58	5.67	0.1874	55.29	10.48	0.1482	28.18	0	99.9622	0.499911	0.489445	0.0106439
	Young PD	28 BAF	298.84	6.69	0.3027	57.89	8.3	0.1457	26.3	0.0064	99.658	0.399676	0.582968	0.0173557
	Young PD	28 BAF	198.01	6.24	0.1924	56.41	8.91	0.1457	27.21	0.002	99.1543	0.436098	0.552689	0.0112128
	Young PD	28 BAF	49.92	6.62	0.2763	56.71	8.7	0.1447	26.21	0	98.6833	0.414114	0.570227	0.0156597
	Young PD	28 BAF	251.74	7.86	0.3376	60.61	5.95	0.1443	24.44	0.0064	99.3862	0.289177	0.691287	0.0195366
	Young PD	28 BAF	254.2	6.07	0.2213	55.38	9.68	0.1441	27.36	0.0006	98.8974	0.46254	0.52487	0.0125909
	Young PD	28 BAF	220.7	5.62	0.2112	55.14	10.66	0.1438	28.31	0	100.121	0.505655	0.482417	0.0119287
	Young PD	28 BAF	159.99	5.72	0.1839	54.65	10.59	0.1438	27.76	0	99.0722	0.500472	0.48918	0.0103482
	Young PD	28 BAF	263.8	6.85	0.3035	57.85	8.45	0.1436	26.51	0.0472	100.182	0.398447	0.584513	0.0170402
	Young PD	28 BAF	202.36	5.81	0.2025	55.71	10.25	0.1432	27.96	0.0037	100.097	0.487978	0.500543	0.0114789
	Young PD	28 BAF	214.95	7.29	0.2835	58.75	7.53	0.1412	25.6	0.0029	99.5976	0.357554	0.626417	0.0160288
	Young PD	28 BAF	118.46	6.32	0.2149	56.92	9.31	0.1397	27.1	0.0195	100.054	0.443276	0.544541	0.0121832
	Young PD	28 BAF	152.92	6.06	0.2192	56.11	9.94	0.1397	27.73	0.0101	100.219	0.469591	0.518078	0.0123303
	Young PD	28 BAF	156.6	6.75	0.2367	57.62	8.5	0.1389	26.15	0	99.4002	0.404823	0.581754	0.0134229
	Young PD	28 BAF	135.24	6.4	0.226	57.26	9.01	0.1379	26.83	0	99.8851	0.431912	0.555188	0.0128997
	Young PD	28 BAF	333.88	6.71	0.2936	57.86	8.45	0.1374	26.42	0	99.8756	0.403492	0.579815	0.016693
	Young PD	28 BAF	287.96	6.71	0.2724	56.64	8.75	0.1373	26.34	0.0072	98.8695	0.412406	0.572307	0.0152871
	Young PD	28 BAF	98.25	6.26	0.2194	56.5	9.38	0.137	27.3	0	99.8152	0.447316	0.540226	0.012458
	Young PD	28 BAF	219.14	5.68	0.1935	55.68	10.49	0.1369	28.07	0.0162	100.297	0.499546	0.489483	0.0109719
	Young PD	28 BAF	102.28	7.02	0.3212	58.71	7.91	0.1365	25.78	0.0019	99.8796	0.376738	0.605047	0.0182154
	Young PD	28 BAF	86.61	5.43	0.1781	54.23	10.96	0.1364	28.04	0	98.992	0.521946	0.467955	0.010099
	Young PD	28 BAF	180.1	6.41	0.2102	56.69	8.79	0.1359	27.09	0.0264	99.3698	0.425872	0.562002	0.0121262
	Young PD	28 BAF	136.2	7.34	0.3538	59.07	7.22	0.135	25.24	0.0031	99.3906	0.345059	0.634807	0.0201333
	Young PD	28 BAF	123.3	5.66	0.1759	54.22	10.62	0.1344	27.91	0.0133	98.7608	0.503988	0.486073	0.00993945
	Young PD	28 BAF	135.53	5.43	0.1921	54.16	10.96	0.1344	27.93	0	98.8137	0.521532	0.467584	0.0108843
	Young PD	28 BAF	147.76	5.57	0.1803	54.52	10.58	0.1344	27.84	0.0231	98.8869	0.506843	0.482872	0.0102845
	Young PD	28 BAF	321.72	6.36	0.2323	55.79	9.26	0.1323	27	0.0036	98.8041	0.439992	0.546865	0.0131427
	Young PD	28 BAF	68.52	7.27	0.3522	59.02	7.37	0.1321	25.4	0	99.5461	0.351868	0.62811	0.0200218
	Young PD	28 BAF	162.19	6.9	0.2759	58.15	7.65	0.1318	26.09	0.0064	99.2288	0.37381	0.610138	0.0160525
	Young PD	28 BAF	108.46	7.36	0.3236	59.33	7.01	0.1291	25.4	0.0167	99.5843	0.338416	0.642983	0.0186012
	Young PD	28 BAF	203.8	5.76	0.2087	55.39	10.37	0.1272	28.17	0.0106	100.05	0.492825	0.495365	0.0118097
	Young PD	28 BAF	233.83	7.98	0.3594	60.58	5.7	0.1271	24.24	0	99.0044	0.277119	0.702076	0.0208051
	Young PD	28 BAF	235.92	6.15	0.221	56.67	9.59	0.1267	27.5	0	100.272	0.457051	0.530408	0.0125412
	Young PD	28 BAF	153.1	7.29	0.3395	58.83	7.47	0.1258	25.61	0	99.6956	0.354593	0.626218	0.0191889
	Young PD	28 BAF	252.44	7.95	0.4647	61.22	5.98	0.1252	23.88	0	99.6484	0.285853	0.687698	0.0264493
	Young PD	28 BAF	136.04	6.12	0.237	56.53	9.56	0.1249	27.36	0	99.9358	0.457042	0.529467	0.0134911
	Young PD	28 BAF	119.16	6.71	0.2961	57.81	8.46	0.1246	26.36	0	99.7795	0.403719	0.579456	0.0168247
	Young PD	28 BAF	68.6	5.82	0.2193	55.61	10.14	0.1228	27.78	0.0088	99.7113	0.484399	0.503127	0.012474
	Young PD	28 BAF	184.45	6.04	0.2085	55.26	10.05	0.1228	27.53	0.0011	99.2621	0.473422	0.514883	0.0116947
	Young PD	28 BAF	195.5	7.23	0.2748	58.86	7.7	0.1226	25.59	0.0096	99.8186	0.364742	0.619759	0.0154993
	Young PD	28 BAF	102.4	7.31	0.3463	59.28	7.2	0.1223	25.37	0	99.6429	0.345478	0.634737	0.0197852
	Young PD	28 BAF	90.55	7.67	0.3791	59.98	6.28	0.1221	24.83	0	99.2964	0.304688	0.673411	0.0219003
	Young PD	28 BAF	176.05	6.58	0.222	57.33	8.88	0.122	26.45	0.0042	99.6165	0.421819	0.565625	0.0125565
	Young PD	28 BAF	51.7	7.99	0.4866	60.82	6.04	0.1219	24.05	0	99.5187	0.28655	0.685962	0.0274876
	Young PD	28 BAF	72.64	7.12	0.3243	59.21	7.34	0.1218	25.05	0.0232	99.1983	0.356126	0.625139	0.0187351
	Young PD	28 BAF	126.37	7.02	0.2996	58.19	7.51	0.1203	25.98	0.0267	99.1876	0.365089	0.617569	0.0173421
	Young PD	28 BAF	304.84	6.85	0.2699	57.25	8.34	0.1187	26.02	0.0013	98.8518	0.396062	0.588677	0.0152616
	Young PD	28 BAF	203.56	7.13	0.3475	59	7.59	0.1175	25.84	0.0011	100.07	0.363047	0.617162	0.0197914
	Young PD	28 BAF	271.08	5.86	0.2007	54.92	10.16	0.1175	27.67	0.0021	98.949	0.483731	0.504891	0.0113778
	Young PD	28 BAF	37.69	6.85	0.2959	57.15	8.26	0.1175	25.98	0.024	98.6962	0.393178	0.590051	0.0167709
	Young PD	28 BAF	85.5	7.12	0.3123	58.5	7.79	0.1172	25.96	0	99.863	0.370135	0.612197	0.0176683
	Young PD	28 BAF	169.8	6.24	0.2446	56.56	9.45	0.1139	27.43	0	100.086	0.449287	0.536866	0.0138468
	Young PD	28 BAF	216.52	8.03	0.4512	61.08	6.05	0.1128	24.02	0	99.7492	0.286478	0.688083	0.0254393
	Young PD	28 BAF	254.5	5.9	0.2242	55.52	10.27	0.1125	27.93	0	99.9607	0.48412	0.503296	0.012584
	Young PD	28 BAF	234.48	7.97	0.4472	61.1	5.94	0.1122	23.88	0	99.494	0.284276	0.690241	0.0254833
	Young PD	28 BAF	119.3	7.28	0.3524	58.78	7.42	0.1121	25.68	0.0099	99.6397	0.353103	0.626929	0.019968
	Young PD	28 BAF	108.76	7.93	0.451	61.03	6.13	0.1118	23.97	0.0102	99.6638	0.291664	0.682786	0.0255505
	Young PD	28 BAF	144.28	6.87	0.2549	57.85	7.97	0.1113	26.25	0.0081	99.3144	0.384919	0.600423	0.0146582
	Young PD	28 BAF	170	6.77	0.2886	57.93	8.25	0.1104	26.1	0.011	99.4601	0.395782	0.587733	0.0164854
	Young PD	28 BAF	100.45	7.99	0.4337	61.29	6.05	0.1101	24.37	0.0025	100.264	0.287748	0.687691	0.0245611
	Young PD	28 BAF	234.4	6.52	0.2219	57.29	8.87	0.1101	26.6	0	99.6394	0.423733	0.563645	0.012622
	Young PD	28 BAF	108.1	8.08	0.4413	61.31	6.02	0.1098	24.22	0.0156	100.233	0.284402	0.690774	0.0248239
	Young PD	28 BAF	144.68	7.96	0.4516	61.27	5.79	0.1084	23.75	0.0115	99.3858	0.279274	0.69479	0.0259362
	Young PD	28 BAF	62.15	5.86	0.1928	55.04	10.23	0.1077	27.63	0.0022	99.0908	0.485663	0.503438	0.0108985
	Young PD	28 BAF	90.8	6.97	0.3237	58.48	7.93	0.1072	25.8	0	99.6496	0.378909	0.602675	0.0184164
	Young PD	28 BAF	72.84	8.07	0.4428	61.2	6.03	0.1068	23.83	0.0016	99.6813	0.284959	0.690125	0.0249157
	Young PD	28 BAF	198.56	8.04	0.4567	61.08	5.95	0.106	23.89	0.0036	99.5425	0.282752	0.691407	0.0258416
	Young PD	28 BAF	137.15	7.77	0.3377	60.26	6.54	0.1057	24.66	0	99.6863	0.311386	0.66947	0.0191449
	Young PD	28 BAF	253.85	7.23	0.3035	59.26	7.32	0.1054	25.24	0	99.4871	0.352517	0.63008	0.0174032
	Young PD	28 BAF	85.4	7.18	0.3523	58.72	7.66	0.1048	25.61	0	99.6527	0.363505	0.616588	0.0199065
	Young PD	28 BAF	273.3	7.66	0.3386	59.98	6.73	0.1028	24.6	0	99.4257	0.320554	0.660243	0.0192032
	Young PD	28 BAF	186.9	6.44	0.2631	56.97	9.11	0.1003	26.93	0.0031	99.8205	0.432219	0.552918	0.014863
	Young PD	28 BAF	126.72	8.07	0.461	61.31	5.89	0.0998	23.77	0	99.6133	0.279908	0.694006	0.0260857
	Young PD	28 BAF	54.88	7.95	0.4498	61.1	6.03	0.0921	23.79	0.0168	99.4405	0.287799	0.686639	0.0255619
	Young PD	28 BAF	271.4	7.91	0.4624	60.92	6.22	0.0912	24.38	0.0006	99.9843	0.295	0.678887	0.0261126
	Young PD	28 BAF	322.1	7.92	0.4617	61.11	6.1	0.0861	24.37	0.0058	100.084	0.290725	0.683074	0.0262008
	Young PD	28 BAF	305.2	7.76	0.4659	61	6.17	0.0835	24.24	0	99.7245	0.297099	0.676188	0.0267122
	Young PD	28 BAF	162.64	7.95	0.4524	61.48	5.87	0.0731	23.85	0	99.7298	0.282277	0.69182	0.0259036
	Young PD	37 BAF	1	6.18	0.2978	55.59	10.01	0.3675	27.61	0	100.094	0.464542	0.519002	0.0164557
	Young PD	37 BAF	1	6.34	0.4848	57.26	8.92	0.3533	26.99	0.017	100.392	0.425364	0.547109	0.027527
	Young PD	37 BAF	1	6.74	0.4113	57.35	8.71	0.3446	26.49	0.0205	100.086	0.407074	0.570038	0.0228883
	Young PD	37 BAF	13.97	6.66	0.3177	56.6	9.14	0.337	27.11	0.0258	100.191	0.423729	0.558734	0.0175372
	Young PD	37 BAF	1	6.81	0.4393	57.34	8.58	0.3367	25.91	0.0223	99.5237	0.400436	0.575152	0.0244123
	Young PD	37 BAF	32.3	6.7	0.2208	56.72	9.28	0.3353	26.81	0.0179	100.098	0.428293	0.559573	0.0121337
	Young PD	37 BAF	1	6.22	0.3989	56.46	9.32	0.3329	27.41	0.0149	100.194	0.442737	0.5347	0.0225629
	Young PD	37 BAF	26.94	6.27	0.251	55.75	9.92	0.3252	27.67	0.0123	100.224	0.46	0.526142	0.0138586
	Young PD	37 BAF	1	6.25	0.3037	56.02	9.76	0.3227	27.79	0.0137	100.488	0.455398	0.527729	0.0168728
	Young PD	37 BAF	41.29	6.81	0.251	57.1	8.79	0.3195	25.86	0.0077	99.161	0.410509	0.575533	0.0139575
	Young PD	37 BAF	1	6.51	0.3802	56.68	9.11	0.3181	27.24	0.01	100.275	0.42683	0.551959	0.0212104
	Young PD	37 BAF	17.02	6.36	0.2294	56.59	9.61	0.3146	27.59	0	100.706	0.449225	0.538006	0.0127684
	Young PD	37 BAF	14.43	6.92	0.265	57.42	8.59	0.3106	26.12	0.0254	99.6905	0.400874	0.5844	0.0147252
	Young PD	37 BAF	14.86	6.23	0.2612	56.17	9.28	0.3084	26.94	0.0147	99.2411	0.444764	0.54033	0.0149058
	Young PD	37 BAF	1	6.04	0.291	55.31	9.8	0.3058	27.68	0.0163	99.4583	0.46497	0.518591	0.0164396
	Young PD	37 BAF	12.73	6.39	0.2459	56.35	9.67	0.3014	27.34	0.0196	100.37	0.449218	0.537181	0.0136016
	Young PD	37 BAF	9.01	6.7	0.3105	57.27	8.88	0.2976	26.94	0.0383	100.498	0.415454	0.567249	0.0172971
	Young PD	37 BAF	27.86	6.46	0.2228	56.25	9.44	0.297	26.62	0.0335	99.3587	0.441215	0.546386	0.0123992
	Young PD	37 BAF	52.16	6.51	0.254	57.66	8.64	0.2959	26.86	0.0166	100.27	0.416926	0.56848	0.0145942
	Young PD	37 BAF	79.25	6.46	0.2197	56.49	9.57	0.2934	27.33	0.0115	100.402	0.444666	0.543179	0.0121549
	Young PD	37 BAF	16.65	6.51	0.2172	56.16	9.63	0.2899	27.36	0.0112	100.218	0.444408	0.543658	0.0119348
	Young PD	37 BAF	24.46	6.44	0.2195	55.95	9.7	0.2868	27.09	0.015	99.7385	0.448755	0.539154	0.0120913
	Young PD	37 BAF	36.19	5.67	0.1697	54.79	11.02	0.285	28.15	0.0268	100.152	0.512972	0.477622	0.00940578
	Young PD	37 BAF	1	6.44	0.2746	56.63	9.45	0.2836	27.34	0.0077	100.471	0.440951	0.543793	0.0152567
	Young PD	37 BAF	128.9	7.21	0.29	58.76	7.86	0.2806	26.12	0.016	100.562	0.369835	0.613918	0.0162474
	Young PD	37 BAF	26.58	6.38	0.2418	56.64	9.4	0.2786	27.37	0.0093	100.35	0.4427	0.543741	0.0135594
	Young PD	37 BAF	13.79	6.37	0.3089	56.7	9.17	0.2725	27.13	0.0354	99.9959	0.435316	0.547223	0.0174604
	Young PD	37 BAF	94.9	6.51	0.2208	56.09	9.63	0.2699	27.21	0.0243	99.9844	0.44432	0.54355	0.0121302
	Young PD	37 BAF	37.48	6.33	0.2166	56.22	9.53	0.2633	27.54	0.0207	100.164	0.448622	0.539238	0.0121408
	Young PD	37 BAF	90.53	6.65	0.2478	57.4	8.81	0.2615	26.74	0.0174	100.129	0.416764	0.569279	0.0139578
	Young PD	37 BAF	110.55	6.31	0.2152	55.87	9.88	0.2594	27.63	0.0119	100.21	0.458363	0.52975	0.0118876
	Young PD	37 BAF	70.3	6.54	0.206	56.56	9.41	0.2593	27.62	0.0171	100.629	0.437873	0.550713	0.0114137
	Young PD	37 BAF	28.72	6.42	0.2297	56.19	9.23	0.2578	26.84	0.0159	99.1888	0.436999	0.550051	0.0129491
	Young PD	37 BAF	77.74	6.82	0.2498	57.52	8.64	0.2554	26.75	0.004	100.262	0.406032	0.57999	0.0139778
	Young PD	37 BAF	15.47	6.44	0.2781	56.82	9.05	0.2553	27.13	0.0207	99.9949	0.430233	0.554026	0.0157419
	Young PD	37 BAF	154.48	6.53	0.2589	57.43	8.69	0.2552	26.82	0.0021	99.9911	0.417485	0.567705	0.01481
	Young PD	37 BAF	25.03	6.77	0.2611	57.67	8.74	0.2549	26.84	0.0189	100.582	0.410289	0.575117	0.0145944
	Young PD	37 BAF	98.02	5.96	0.1914	55.42	10.26	0.2529	28.21	0.0237	100.372	0.482295	0.506992	0.0107129
	Young PD	37 BAF	84.16	5.69	0.1595	54.71	10.81	0.2522	28.65	0.0106	100.316	0.50759	0.483492	0.00891763
	Young PD	37 BAF	33.04	6.96	0.2672	58.72	8.32	0.2454	26.81	0.0352	101.409	0.39184	0.593176	0.0149838
	Young PD	37 BAF	47.95	6.53	0.222	56.58	9.59	0.2415	27.35	0	100.563	0.442523	0.54528	0.0121975
	Young PD	37 BAF	141.69	7	0.289	58.17	8.22	0.24	26.3	0.0194	100.238	0.387161	0.596632	0.0162076
	Young PD	37 BAF	56.44	6.63	0.2427	56.62	8.87	0.2396	26.52	0.003	99.1423	0.41925	0.567091	0.013659
	Young PD	37 BAF	64.95	6.55	0.2575	57.34	8.8	0.238	26.77	0.0214	100.006	0.419854	0.565518	0.0146283
	Young PD	37 BAF	65.08	7.24	0.2873	58.83	7.95	0.2378	26.29	0.0138	100.892	0.371603	0.612407	0.01599
	Young PD	37 BAF	116.11	7.06	0.2927	58.23	8	0.2354	26.07	0.0145	99.9684	0.378707	0.604794	0.0164982
	Young PD	37 BAF	63.6	6.77	0.2679	57.39	8.73	0.2352	26.65	0.0037	100.072	0.409856	0.575168	0.0149758
	Young PD	37 BAF	180.06	6.5	0.2378	56.51	8.79	0.2345	26.8	0.0242	99.0984	0.421872	0.564539	0.0135895
	Young PD	37 BAF	103.32	6.54	0.2441	57.16	8.93	0.231	27.07	0.016	100.222	0.424115	0.562081	0.0138039
	Young PD	37 BAF	41.05	5.84	0.1878	55.48	10.34	0.2297	28.23	0.0086	100.328	0.489309	0.500109	0.0105818
	Young PD	37 BAF	111.88	5.79	0.1662	54.91	10.75	0.2283	28.72	0.0276	100.629	0.501735	0.489028	0.0092363
	Young PD	37 BAF	39.37	6.28	0.2253	56.37	9.51	0.2251	27.6	0.0282	100.265	0.4498	0.537512	0.0126882
	Young PD	37 BAF	167.27	6.52	0.2451	57.19	9.03	0.2222	26.98	0.0022	100.189	0.427544	0.558638	0.0138178
	Young PD	37 BAF	116.76	6.02	0.2023	55.36	10	0.2183	28.19	0.0012	100.014	0.473152	0.51545	0.0113972
	Young PD	37 BAF	42.58	6.88	0.2482	57.07	8.64	0.2119	26.38	0.0057	99.4689	0.404007	0.582174	0.013819
	Young PD	37 BAF	52.88	6.41	0.2273	56.22	9.44	0.2099	27.53	0.0026	100.078	0.442977	0.544323	0.0127002
	Young PD	37 BAF	73.96	6.9	0.2711	57.14	8.35	0.207	26.31	0	99.2058	0.394627	0.590117	0.0152556
	Young PD	37 BAF	44.41	7.16	0.2933	58.65	7.97	0.2062	26.12	0	100.437	0.374598	0.608988	0.0164142
	Young PD	37 BAF	73.35	7.15	0.2913	57.84	8.13	0.203	26.23	0.0142	99.8645	0.379628	0.604176	0.0161961
	Young PD	37 BAF	189.11	5.92	0.1845	55.32	10.27	0.2027	27.68	0.007	99.6297	0.484373	0.505266	0.0103611
	Young PD	37 BAF	68.15	7.08	0.2519	57.9	8.49	0.2026	26.26	0	100.211	0.393017	0.593098	0.0138846
	Young PD	37 BAF	203.58	5.73	0.1946	54.57	10.76	0.2005	27.9	0.0127	99.3865	0.503725	0.485428	0.0108474
	Young PD	37 BAF	131.23	5.53	0.1673	54.52	10.78	0.1932	28.71	0.0086	99.9476	0.513665	0.476843	0.00949201
	Young PD	37 BAF	47.92	7.26	0.2616	58.11	8.38	0.191	26.03	0.0113	100.246	0.383886	0.601845	0.0142691
	Young PD	37 BAF	39.91	6.53	0.2455	56.22	9.46	0.19	27.81	0.0086	100.506	0.438589	0.547859	0.0135525
	Young PD	37 BAF	58.88	7.03	0.274	57.86	8.19	0.1892	26.24	0.005	99.8001	0.385631	0.599008	0.0153617
	Young PD	37 BAF	174.64	6.01	0.1915	55.24	10.12	0.1883	27.76	0.0193	99.5849	0.476821	0.512435	0.0107435
	Young PD	37 BAF	49.06	6.9	0.2677	58.01	8.36	0.1849	26.79	0.0088	100.535	0.394988	0.589952	0.0150601
	Young PD	37 BAF	87.82	6.78	0.2556	57.44	8.77	0.1811	26.79	0.0263	100.248	0.410896	0.574845	0.0142592
	Young PD	37 BAF	29.94	6.74	0.2631	57.59	8.64	0.1793	26.89	0.0024	100.346	0.408508	0.576681	0.0148118
	Young PD	37 BAF	18.82	6.81	0.2403	56.95	9.04	0.1781	27.19	0	100.424	0.417558	0.569226	0.0132161
	Young PD	37 BAF	102.29	6.3	0.2142	56.23	9.45	0.177	27.57	0.0273	100.002	0.447746	0.540169	0.0120843
	Young PD	37 BAF	59.65	6.92	0.2574	57.64	8.77	0.1757	26.51	0.0181	100.302	0.406035	0.579775	0.0141897
	Young PD	37 BAF	949.48	6.47	0.2051	56.36	9.52	0.1737	27.74	0.012	100.521	0.443358	0.545269	0.0113732
	Young PD	37 BAF	57.07	7.09	0.2785	58.59	8.04	0.1728	26.27	0.0071	100.494	0.379212	0.605148	0.0156405
	Young PD	37 BAF	83.11	7.02	0.2501	57.75	8.59	0.1708	26.15	0.0117	99.9625	0.397844	0.588364	0.0137922
	Young PD	37 BAF	71.38	6.85	0.2477	57.47	8.89	0.1676	26.52	0.0132	100.193	0.411939	0.574395	0.0136665
	Young PD	37 BAF	1168.36	6.89	0.2278	57.01	8.85	0.1666	27	0.0009	100.16	0.40992	0.577516	0.0125635
	Young PD	37 BAF	73.09	7.36	0.3052	58.98	7.7	0.1664	25.95	0	100.49	0.360112	0.622893	0.0169954
	Young PD	37 BAF	160.17	5.76	0.1748	55.08	10.45	0.1649	27.9	0	99.5543	0.495693	0.494434	0.00987277
	Young PD	37 BAF	126.2	7.85	0.334	59.32	7.47	0.1642	25.57	0.0104	100.755	0.338418	0.643565	0.0180169
	Young PD	37 BAF	730.6	6.47	0.1911	56.24	9.62	0.1637	27.91	0	100.616	0.446283	0.543161	0.0105559
	Young PD	37 BAF	511.72	7.42	0.256	58.55	7.88	0.1636	26.22	0	100.522	0.364608	0.621288	0.014104
	Young PD	37 BAF	1058.92	6.94	0.2436	56.91	8.79	0.1613	26.97	0.0039	100.019	0.406213	0.580382	0.0134043
	Young PD	37 BAF	876.52	6.56	0.1849	56.51	9.37	0.1608	27.57	0	100.362	0.436599	0.553142	0.0102584
	Young PD	37 BAF	1131.88	6.46	0.7387	57.96	8.41	0.1588	26.19	0	99.9707	0.400863	0.557213	0.0419246
	Young PD	37 BAF	65.85	6	0.1973	55.15	10.41	0.1584	28.36	0.0093	100.304	0.484125	0.504949	0.0109253
	Young PD	37 BAF	840.04	6.7	0.2018	56.99	9.03	0.1582	27.4	0	100.48	0.422065	0.566704	0.0112309
	Young PD	37 BAF	584.68	6.91	0.2157	56.87	9	0.158	27.31	0	100.481	0.413577	0.574621	0.0118023
	Young PD	37 BAF	1241.32	6.9	0.2047	56.79	9.09	0.1578	27.09	0.0085	100.249	0.416587	0.572243	0.0111702
	Young PD	37 BAF	78.82	7.46	0.3031	58.52	7.85	0.1564	26.22	0.0096	100.535	0.361573	0.621804	0.0166231
	Young PD	37 BAF	81.58	6.76	0.2499	57.17	8.93	0.1552	26.71	0	100.022	0.416111	0.570024	0.0138651
	Young PD	37 BAF	1	7.58	0.3783	59.08	7.6	0.1545	25.98	0.0096	100.804	0.349146	0.630161	0.0206933
	Young PD	37 BAF	985.96	7.47	0.2749	58.44	7.99	0.1536	26.41	0	100.772	0.365922	0.619087	0.0149906
	Young PD	37 BAF	173.15	7.75	0.3527	59.51	7.32	0.1534	25.43	0.0115	100.549	0.336326	0.644378	0.0192955
	Young PD	37 BAF	146.92	7.21	0.2661	57.98	8.33	0.1534	26.59	0.0112	100.583	0.383973	0.601422	0.014605
	Young PD	37 BAF	365.8	6.41	0.1996	56.09	9.64	0.1531	27.82	0	100.337	0.448844	0.54009	0.0110657
	Young PD	37 BAF	145.7	5.67	0.18	55.23	10.63	0.153	28.19	0.0082	100.103	0.503674	0.486171	0.0101552
	Young PD	37 BAF	1204.84	6.88	0.2178	56.65	8.96	0.1526	27.12	0	100.02	0.413483	0.574549	0.0119676
	Young PD	37 BAF	125.74	6.81	0.2484	56.73	8.94	0.1522	27.13	0.0228	100.036	0.41467	0.571612	0.0137188
	Young PD	37 BAF	1022.44	8.13	0.334	60.23	6.61	0.1521	25.09	0.0147	100.562	0.304328	0.677362	0.01831
	Young PD	37 BAF	250.48	6.93	0.2241	57.21	8.81	0.1514	27.09	0	100.428	0.407539	0.580117	0.0123434
	Young PD	37 BAF	165.22	6.2	0.2045	55.76	9.93	0.1511	27.27	0.0209	99.5718	0.464166	0.524452	0.011382
	Young PD	37 BAF	767.08	5.45	0.1206	54.11	11.18	0.1509	29.22	0.0033	100.247	0.527705	0.465517	0.00677794
	Young PD	37 BAF	339.58	6.26	0.1783	55.53	9.74	0.1501	27.77	0	99.6406	0.457695	0.532329	0.00997629
	Young PD	37 BAF	104.76	7.15	0.2747	57.61	8.34	0.1488	26.62	0.0191	100.169	0.386005	0.598856	0.0151386
	Young PD	37 BAF	803.56	6.8	0.2178	57.1	8.87	0.148	27.18	0.0153	100.331	0.413813	0.574088	0.0120987
	Young PD	37 BAF	220.1	7.45	0.313	58.47	7.99	0.1476	26.16	0	100.538	0.365769	0.61717	0.017061
	Young PD	37 BAF	188.8	7.61	0.3199	58.64	7.81	0.1473	25.98	0	100.553	0.355611	0.627045	0.0173436
	Young PD	37 BAF	621.16	7.75	0.284	58.99	7.4	0.1473	25.38	0.0183	100.001	0.34003	0.644431	0.0155384
	Young PD	37 BAF	329.32	6.98	0.2218	57	8.83	0.1469	27.12	0	100.312	0.406439	0.581405	0.0121562
	Young PD	37 BAF	72.28	6.88	0.2141	56.96	9.13	0.1467	27.38	0	100.73	0.418133	0.570192	0.0116751
	Young PD	37 BAF	438.76	6.93	0.2304	57.58	8.7	0.1455	26.99	0.0021	100.631	0.404368	0.582881	0.0127509
	Young PD	37 BAF	657.64	7.18	0.236	57.78	8.39	0.1451	26.55	0.0151	100.32	0.387276	0.599753	0.0129709
	Young PD	37 BAF	106.57	6.15	0.1877	55.81	10.1	0.1447	27.36	0.0023	99.7784	0.470803	0.518779	0.010418
	Young PD	37 BAF	130.03	5.66	0.1672	54.8	10.78	0.1444	27.91	0.0039	99.47	0.507974	0.482645	0.00938122
	Young PD	37 BAF	141.76	5.94	0.1834	55.36	10.45	0.1436	27.55	0	99.6639	0.487917	0.501887	0.010196
	Young PD	37 BAF	117.73	7.08	0.2701	57.92	8.2	0.1433	26.6	0.0115	100.254	0.384367	0.600558	0.015075
	Young PD	37 BAF	143.67	7.72	0.2958	59.08	7.42	0.1433	25.82	0	100.514	0.341267	0.642534	0.016199
	Young PD	37 BAF	376.6	7.68	0.3253	59.24	7.32	0.1423	25.77	0.0002	100.49	0.338806	0.643266	0.0179277
	Young PD	37 BAF	402.28	6.56	0.2027	56.37	9.34	0.1422	27.59	0.0175	100.272	0.43538	0.553369	0.0112506
	Young PD	37 BAF	282.7	7.5	0.2905	58.61	7.92	0.1417	26.21	0.0092	100.702	0.362669	0.621492	0.0158392
	Young PD	37 BAF	183.4	8.01	0.3272	59.85	6.76	0.1411	25.3	0	100.389	0.312316	0.669684	0.0179996
	Young PD	37 BAF	251.4	7.37	0.2801	58.66	8.01	0.1402	26.11	0.0141	100.59	0.369457	0.61516	0.0153832
	Young PD	37 BAF	54.72	7.28	0.2854	58.23	7.87	0.1401	25.41	0.0141	99.2297	0.368034	0.616075	0.0158916
	Young PD	37 BAF	298.35	7.46	0.2771	58.43	7.9	0.1393	26.25	0.0202	100.489	0.363557	0.621259	0.0151839
	Young PD	37 BAF	36.64	7.25	0.2594	58.01	8.25	0.1383	26.69	0	100.628	0.380558	0.605194	0.0142475
	Young PD	37 BAF	197.02	6.91	0.2288	57.22	8.88	0.1379	27.16	0	100.559	0.41003	0.577391	0.0125794
	Young PD	37 BAF	1095.4	6.76	0.2865	57.19	8.77	0.1367	27.19	0.0029	100.376	0.410884	0.573133	0.0159825
	Young PD	37 BAF	204.45	7.6	0.3308	58.68	7.72	0.1361	25.92	0.0156	100.42	0.353043	0.628945	0.0180126
	Young PD	37 BAF	110.44	8.09	0.3527	60.2	6.55	0.1353	24.99	0.0081	100.359	0.303103	0.677464	0.0194337
	Young PD	37 BAF	208.9	6.23	0.1834	55.61	10.29	0.1341	28.33	0.0096	100.793	0.472401	0.517574	0.0100253
	Young PD	37 BAF	141.85	7.71	0.3335	59.11	7.38	0.1338	25.51	0.0103	100.188	0.339633	0.642092	0.0182747
	Young PD	37 BAF	303.94	7.88	0.3116	58.54	7.21	0.133	25.51	0.0027	99.5904	0.330115	0.652898	0.0169874
	Young PD	37 BAF	319.78	6.05	0.1667	55.32	10.2	0.1326	28.6	0.0217	100.491	0.477825	0.512877	0.00929833
	Young PD	37 BAF	156.64	7.41	0.3013	59.06	7.5	0.1314	25.92	0.0129	100.355	0.352641	0.630491	0.0168683
	Young PD	37 BAF	278.2	6.2	0.1737	55.41	10.18	0.1312	28.29	0.0037	100.445	0.471154	0.519274	0.00957229
	Young PD	37 BAF	157.5	7.6	0.321	58.8	7.72	0.131	25.89	0.0067	100.472	0.353231	0.629281	0.0174883
	Young PD	37 BAF	182.58	6.73	0.2266	57.24	8.58	0.1302	26.8	0	99.7069	0.408016	0.579154	0.0128307
	Young PD	37 BAF	153.46	6.97	0.2229	57.08	8.94	0.13	27.11	0.0114	100.472	0.409744	0.578092	0.0121643
	Young PD	37 BAF	235.75	7.2	0.2849	58.03	8.27	0.1295	26.46	0.0202	100.404	0.382188	0.602135	0.0156771
	Young PD	37 BAF	305.92	6.25	0.1696	55.44	10.23	0.1291	28.36	0.0142	100.617	0.470515	0.520197	0.00928806
	Young PD	37 BAF	314	7.32	0.2735	58.63	7.97	0.1286	26.19	0.0026	100.55	0.369973	0.61491	0.0151171
	Young PD	37 BAF	125.74	6.87	0.2394	57.01	8.72	0.128	27	0.0093	99.9967	0.40677	0.579933	0.0132971
	Young PD	37 BAF	333.64	5.88	0.1499	54.86	10.54	0.128	28.59	0.0031	100.183	0.493467	0.498177	0.00835641
	Young PD	37 BAF	360.95	7.42	0.3055	58.93	7.73	0.128	25.92	0	100.445	0.359181	0.623917	0.0169023
	Young PD	37 BAF	219.88	8.47	0.3733	60.94	5.89	0.128	24.36	0.0107	100.172	0.271904	0.707577	0.0205192
	Young PD	37 BAF	913	6.62	0.1976	56.79	9.39	0.1279	27.5	0	100.678	0.434621	0.554489	0.0108901
	Young PD	37 BAF	475.24	6.02	0.1695	55.5	10.22	0.1277	28.27	0.006	100.336	0.479457	0.511075	0.00946824
	Young PD	37 BAF	153.49	5.99	0.1887	55.39	10.46	0.1271	27.51	0	99.6998	0.485961	0.5036	0.0104386
	Young PD	37 BAF	169.61	7.02	0.2725	58.13	8.07	0.127	26.26	0.0029	99.9037	0.3825	0.602121	0.0153789
	Young PD	37 BAF	90.1	7.48	0.263	58.33	7.96	0.1269	26.49	0	100.673	0.364984	0.620657	0.0143588
	Young PD	37 BAF	143.56	6.97	0.2552	57.17	8.72	0.1268	26.76	0	100.007	0.403014	0.582942	0.0140438
	Young PD	37 BAF	139.6	6.47	0.2169	56.43	9.55	0.1248	27.68	0	100.49	0.443844	0.544153	0.0120029
	Young PD	37 BAF	694.12	7.55	0.2739	58.79	7.63	0.124	25.96	0.011	100.373	0.352933	0.631981	0.0150855
	Young PD	37 BAF	236.62	6.3	0.1868	56.07	9.9	0.1237	28.07	0	100.653	0.459971	0.529694	0.0103341
	Young PD	37 BAF	54.46	6.24	0.1897	55.66	9.89	0.1236	28.13	0	100.264	0.461978	0.527471	0.010551
	Young PD	37 BAF	175.59	6.53	0.2059	56.5	9.43	0.1205	27.22	0	100.015	0.438767	0.549826	0.0114072
	Young PD	37 BAF	267.05	7.49	0.2876	58.81	7.81	0.1181	25.99	0	100.519	0.359799	0.624425	0.0157761
	Young PD	37 BAF	292.84	7.82	0.2954	59.56	6.99	0.1179	25.17	0.0071	100	0.325222	0.658413	0.0163649
	Young PD	37 BAF	345.3	7.14	0.2595	58.1	8.17	0.1177	26.31	0.0004	100.138	0.381781	0.603781	0.0144388
	Young PD	37 BAF	130.7	7.26	0.2583	57.78	8.08	0.1173	26.38	0	99.89	0.37537	0.610342	0.0142881
	Young PD	37 BAF	548.2	7.27	0.2352	57.6	8.29	0.1172	26.47	0.0111	99.9936	0.38157	0.60554	0.0128901
	Young PD	37 BAF	268.3	7.76	0.2914	58.46	7.45	0.1164	25.86	0.0108	99.9926	0.341122	0.642991	0.0158871
	Young PD	37 BAF	256.36	8.31	0.3647	60.26	6.4	0.1164	24.9	0.0128	100.372	0.292608	0.687538	0.0198538
	Young PD	37 BAF	118.3	5.83	0.1739	55	10.77	0.1161	28.47	0.0056	100.407	0.500298	0.490084	0.00961863
	Young PD	37 BAF	264.34	6.18	0.1711	55.38	10	0.116	28.09	0.011	99.9925	0.467569	0.522906	0.00952569
	Young PD	37 BAF	161.38	6.91	0.2294	57.32	8.77	0.1141	27.11	0	100.483	0.407005	0.580319	0.0126763
	Young PD	37 BAF	195.04	6.34	0.1903	55.9	9.9	0.114	27.95	0	100.431	0.458341	0.531168	0.0104904
	Young PD	37 BAF	181.18	6.34	0.1949	55.92	9.75	0.1136	27.91	0.0309	100.291	0.454437	0.534746	0.0108164
	Young PD	37 BAF	107.92	6.65	0.2268	56.63	9.15	0.1131	27.37	0	100.184	0.426492	0.56092	0.0125873
	Young PD	37 BAF	214.84	7.59	0.2874	58.5	7.64	0.1131	26.05	0	100.205	0.351794	0.632449	0.0157573
	Young PD	37 BAF	329.65	7.19	0.289	58.48	8.06	0.1123	26.12	0.0024	100.283	0.376366	0.607566	0.0160684
	Young PD	37 BAF	286.12	7.58	0.2827	58.3	7.78	0.107	26.02	0	100.103	0.356332	0.628251	0.0154171
	Young PD	37 BAF	292.06	6.05	0.1692	55.19	10.24	0.107	28.38	0.0073	100.15	0.478735	0.511846	0.00941882
	Young PD	37 BAF	91.79	7.49	0.2811	58.14	7.85	0.1066	26.12	0.0015	100	0.361105	0.623498	0.0153966
	Young PD	37 BAF	94.84	6.84	0.2433	57.22	9.04	0.1061	26.41	0	99.8817	0.416445	0.57021	0.0133454
	Young PD	37 BAF	167.32	6.49	0.2132	56.25	9.38	0.1049	27.49	0.0192	99.9893	0.438762	0.549364	0.0118745
	Young PD	37 BAF	135.3	7.92	0.3118	59.88	7.04	0.1047	25.08	0.0014	100.338	0.323775	0.659151	0.0170745
	Young PD	37 BAF	162.16	6.81	0.2327	56.76	9.28	0.1041	26.68	0.0174	99.9131	0.424119	0.563218	0.012663
	Young PD	37 BAF	179.2	6.53	0.2249	56.49	9.16	0.1035	27.41	0	99.9502	0.431167	0.556228	0.0126049
	Young PD	37 BAF	121.87	7.83	0.344	59.84	7.01	0.1032	24.76	0.0187	99.945	0.324703	0.656325	0.0189726
	Young PD	37 BAF	95.01	6.9	0.2378	57.32	8.79	0.1018	26.58	0.0017	99.9368	0.407707	0.579159	0.0131333
	Young PD	37 BAF	189.02	6.57	0.2096	56.62	9.4	0.1012	27.07	0.0109	100.007	0.436421	0.551992	0.011587
	Young PD	37 BAF	222.76	6.34	0.1826	56.05	9.64	0.1001	27.86	0	100.218	0.451936	0.537871	0.010193
	Young PD	37 BAF	108.44	7.51	0.2788	58.62	7.84	0.0977	25.86	0	100.234	0.360257	0.624489	0.0152542
	Young PD	37 BAF	250.48	6.11	0.1729	55.98	10	0.0968	28.09	0.0052	100.485	0.470307	0.52001	0.00968228
	Young PD	37 BAF	232.66	7.51	0.2584	58.39	7.83	0.0939	26.27	0	100.383	0.360365	0.625475	0.0141604
	Young PD	37 BAF	321.76	6.49	0.2177	56.16	9.1	0.0939	27.32	0.0014	99.4053	0.431204	0.556513	0.0122829
	Young PD	37 BAF	148.73	7.46	0.2863	58.74	7.98	0.0863	25.81	0	100.373	0.365707	0.61867	0.0156226
	Old Nevado	BAF970	12.34	5.9	0.4403	56.19	9.59	0.3899	27.29	0.0184	99.829	0.461256	0.513528	0.0252158
	Old Nevado	BAF970	23.68	5.32	0.3204	54.8	10.76	0.4158	28.19	0.0375	99.8887	0.518087	0.463544	0.0183689
	Old Nevado	BAF970	35.02	5.01	1.35	58.96	8.45	0.5615	24.88	0.0822	99.3286	0.441861	0.474084	0.084055
	Old Nevado	BAF970	46.36	6.53	0.5545	58.07	8.24	0.152	26.23	0	99.7989	0.397739	0.570392	0.0318694
	Old Nevado	BAF970	57.7	6.48	0.4042	57.82	8.51	0.152	26.66	0.0099	100.075	0.410761	0.566009	0.0232304
	Old Nevado	BAF970	69.04	6.65	0.298	57.23	8.48	0.1363	26.55	0.0069	99.3708	0.406347	0.57665	0.0170027
	Old Nevado	BAF970	80.38	6.39	0.2718	57.28	8.94	0.1476	26.9	0.0038	99.9383	0.429247	0.555214	0.0155389
	Old Nevado	BAF970	91.72	6.42	0.2478	57.05	9.01	0.1461	27.08	0	99.9863	0.430629	0.555269	0.014102
	Old Nevado	BAF970	103.06	6.35	0.2562	57.2	8.86	0.1715	26.99	0	99.8478	0.428927	0.556305	0.0147683
	Old Nevado	BAF970	114.4	6.67	0.2857	58.21	8.24	0.122	26.39	0	99.9236	0.399024	0.584503	0.0164734
	Old Nevado	BAF970	125.74	6.92	0.3132	58.73	7.59	0.1476	25.97	0	99.6981	0.370505	0.611291	0.0182043
	Old Nevado	BAF970	137.08	7.11	0.3241	58.79	7.26	0.1308	25.56	0	99.1868	0.353933	0.627254	0.0188133
	Old Nevado	BAF970	148.42	7.21	0.3603	59.26	7.2	0.1251	25.42	0	99.6111	0.348223	0.631029	0.0207486
	Old Nevado	BAF970	159.76	7.3	0.3514	59.12	7.15	0.1399	25.21	0.0132	99.3033	0.344103	0.635761	0.0201365
	Old Nevado	BAF970	1	6.49	0.8753	58.73	7.52	0.4624	24.57	0.0245	98.7484	0.370321	0.578355	0.0513238
	Old Nevado	BAF970	10.22	5.91	0.4557	56.24	9.68	0.3484	27.33	0.0027	100.007	0.46277	0.51129	0.02594
	Old Nevado	BAF970	19.44	5.54	0.307	55.34	10.47	0.3062	28.06	0	100.033	0.501896	0.480581	0.0175229
	Old Nevado	BAF970	28.66	5.56	0.2416	55.03	10.59	0.3311	28.17	0.0175	99.9542	0.50575	0.480512	0.0137384
	Old Nevado	BAF970	37.88	5.54	0.233	55.49	10.59	0.3029	27.92	0.028	100.164	0.506874	0.479847	0.0132789
	Old Nevado	BAF970	47.1	5.2	0.1814	54.28	11.38	0.347	28.57	0.015	99.9952	0.541749	0.447969	0.0102824
	Old Nevado	BAF970	56.32	5.06	0.1785	54.05	11.45	0.3441	28.77	0.027	99.9122	0.549972	0.43982	0.0102088
	Old Nevado	BAF970	65.54	4.4	0.1356	52.27	12.96	0.406	29.85	0.0329	100.088	0.614689	0.377653	0.00765793
	Old Nevado	BAF970	74.76	4.25	0.1436	51.77	13.04	0.3577	29.79	0.023	99.4185	0.623867	0.367953	0.00818031
	Old Nevado	BAF970	83.98	3.5	0.1109	50.46	14.36	0.3013	30.91	0.0038	99.7026	0.689531	0.304128	0.00634062
	Old Nevado	BAF970	93.2	4.16	0.15	52.03	13.3	0.295	29.99	0.0465	99.9963	0.633133	0.358365	0.00850228
	Old Nevado	BAF970	102.42	4.2	0.1652	52.22	12.91	0.3081	29.96	0.0032	99.8083	0.623456	0.367044	0.00949928
	Old Nevado	BAF970	120.86	5.79	0.433	55.71	10.22	0.2325	27.19	0.0149	99.5905	0.481773	0.493923	0.0243041
	Old Nevado	BAF970	130.08	5.69	1.31	60.02	7.62	0.563	23.81	0.1059	99.2111	0.391239	0.528675	0.0800865
	Old Nevado	BAF970	139.3	5.76	0.5901	57.03	9.37	0.3407	26.52	0.0311	99.7167	0.45716	0.508558	0.0342812
	Old Nevado	BAF970	148.52	5.88	0.3398	55.77	9.92	0.2021	27.28	0.0232	99.4197	0.473165	0.507537	0.0192986
	Old Nevado	BAF970	157.74	5.99	0.2863	56.22	9.88	0.1603	27.32	0	99.8856	0.469123	0.51469	0.0161865
	Old Nevado	BAF970	166.96	6.07	0.2566	56.12	9.81	0.1266	27.26	0.0134	99.6774	0.46493	0.52059	0.0144802
	Old Nevado	BAF970	176.18	5.93	0.2336	55.98	10.03	0.1378	27.46	0.0056	99.8234	0.476728	0.510051	0.0132204
	Old Nevado	BAF970	22.56	5.33	0.2634	54.55	10.82	0.3748	27.84	0.0164	99.247	0.520719	0.464187	0.0150936
	Old Nevado	BAF970	44.12	5.26	0.211	54.46	10.92	0.3881	27.92	0.0339	99.2225	0.527794	0.460063	0.012143
	Old Nevado	BAF970	65.68	5.73	0.2447	55.27	10.33	0.3008	27.32	0.017	99.2271	0.492127	0.493993	0.0138807
	Old Nevado	BAF970	87.24	5.63	0.2407	55.05	10.47	0.312	27.53	0.0277	99.2752	0.499885	0.486431	0.0136836
	Old Nevado	BAF970	108.8	5.59	0.2142	54.66	10.65	0.3048	27.42	0.001	98.8519	0.506639	0.481227	0.012133
	Old Nevado	BAF970	130.36	5.08	0.1883	53.63	11.38	0.3099	28.26	0.0131	98.8689	0.547191	0.442028	0.0107807
	Old Nevado	BAF970	151.92	6.85	0.3696	57.94	7.94	0.2264	25.35	0.0075	98.7232	0.382171	0.596647	0.0211822
	Old Nevado	BAF970	173.48	6.89	0.3569	58.1	8.08	0.1758	25.52	0.0283	99.151	0.385252	0.594486	0.0202619
	Old Nevado	BAF970	195.04	6.81	0.3388	57.72	8.13	0.176	25.74	0.0163	98.9422	0.389798	0.590861	0.0193416
	Old Nevado	BAF970	216.6	5.94	0.2655	56.07	9.76	0.2451	27.32	0.0207	99.6327	0.46866	0.51616	0.0151801
	Old Nevado	BAF970	238.16	5.53	0.2527	55.26	10.42	0.283	28.07	0	99.8633	0.502699	0.482786	0.014516
	Old Nevado	BAF970	259.72	5.51	0.2664	55.35	10.54	0.2752	27.95	0.0133	99.9312	0.506043	0.478727	0.0152294
	Old Nevado	BAF970	281.28	5.49	0.4439	55.14	10.41	0.2995	27.84	0.0141	99.6612	0.498721	0.475958	0.0253217
	Old Nevado	BAF970	302.84	5.69	0.3966	55.48	10.12	0.2981	27.62	0.0145	99.6434	0.484465	0.492928	0.0226066
	Old Nevado	BAF970	324.4	5.6	0.427	54.99	10.37	0.301	27.66	0.0362	99.4068	0.493519	0.482284	0.0241966
	Old Nevado	BAF970	345.96	5.59	0.284	55.35	10.32	0.3068	27.89	0.0189	99.7844	0.496775	0.486947	0.0162779
	Old Nevado	BAF970	367.52	6.87	0.3837	58.02	7.7	0.2341	25.34	0.0159	98.57	0.373986	0.603824	0.02219
	Old Nevado	BAF970	389.08	7.13	0.5232	58.93	7.62	0.1326	25.58	0.0245	99.9463	0.360358	0.610181	0.0294611
	Old Nevado	BAF970	410.64	6.84	0.5286	58.49	7.83	0.1675	25.63	0	99.503	0.375769	0.594025	0.0302056
	Old Nevado	BAF970	432.2	6.81	0.3761	58.4	7.84	0.1427	25.82	0.0077	99.4221	0.380372	0.597901	0.0217269
	Old Nevado	BAF970	453.76	6.59	0.3013	57.28	8.71	0.1393	26.48	0.0111	99.5363	0.414876	0.568035	0.0170884
	Old Nevado	BAF970	475.32	6.5	0.298	57.51	8.83	0.1167	26.51	0	99.8267	0.421532	0.561529	0.016939
	Old Nevado	BAF970	496.88	5.94	0.2576	56.26	9.83	0.1391	27.54	0.0011	99.9865	0.470652	0.514662	0.0146857
	Old Nevado	BAF970	518.44	5.48	0.4817	55.23	10.38	0.331	27.67	0.0283	99.616	0.497357	0.475161	0.027482
	Old Nevado	BAF970	540	6.63	0.4332	57.44	8.46	0.2659	26.03	0.0357	99.3175	0.403363	0.572043	0.0245932
	Old Nevado	BAF970	561.56	5.77	0.2304	55.66	10.11	0.2546	27.53	0.0284	99.5924	0.485453	0.501374	0.0131729
	Old Nevado	BAF970	583.12	5.63	0.2531	55.24	9.99	0.339	27.39	0.0021	98.8924	0.487803	0.497481	0.0147154
	Old Nevado	BAF970	669.36	5.78	0.236	55.28	10.01	0.2891	27.59	0.024	99.2092	0.482394	0.504064	0.0135419
	Old Nevado	BAF970	690.92	5.71	0.2303	55.48	10.17	0.2823	27.62	0	99.4927	0.489479	0.497323	0.013198
	Old Nevado	BAF970	712.48	5.73	0.2277	55.43	10.3	0.3027	27.66	0.0139	99.6773	0.491875	0.495178	0.0129474
	Old Nevado	BAF970	734.04	5.72	0.2439	55.6	10.04	0.3033	27.66	0.0144	99.5945	0.485458	0.500499	0.0140421
	Old Nevado	BAF970	15.91	5.76	0.4188	55.75	10.06	0.5004	27.4	0.0251	99.9407	0.479456	0.496778	0.0237661
	Old Nevado	BAF970	30.82	6.31	0.3377	57.27	9.07	0.3025	26.39	0.0338	99.7489	0.434161	0.546591	0.0192476
	Old Nevado	BAF970	45.73	5.96	0.2466	56.21	9.65	0.2967	26.76	0.008	99.1572	0.465531	0.520304	0.014165
	Old Nevado	BAF970	60.64	5.86	0.2391	55.88	9.76	0.3519	26.84	0.0119	98.9721	0.47266	0.513553	0.0137873
	Old Nevado	BAF970	75.55	5.72	0.2352	56.41	9.82	0.3533	27.38	0.0228	99.9729	0.480169	0.506137	0.0136937
	Old Nevado	BAF970	90.46	5.9	0.244	56.3	9.6	0.3267	26.5	0.0092	98.9171	0.46676	0.519115	0.0141258
	Old Nevado	BAF970	105.37	5.85	0.2394	55.85	9.98	0.2984	27.08	0.0156	99.3252	0.478626	0.507704	0.0136707
	Old Nevado	BAF970	120.28	5.58	0.2258	55.5	10.17	0.3463	26.83	0.0161	98.6982	0.495214	0.491694	0.0130917
	Old Nevado	BAF970	135.19	5.72	0.2384	55.75	9.78	0.3658	26.7	0.0045	98.5821	0.479061	0.507034	0.0139046
	Old Nevado	BAF970	179.92	5.3	0.2187	54.73	10.59	0.3634	27.51	0.0193	98.7597	0.518065	0.469195	0.0127391
	Old Nevado	BAF970	194.83	5.73	0.249	55.8	9.94	0.3634	26.83	0.022	98.9506	0.482392	0.50322	0.0143884
	Old Nevado	BAF970	209.74	5.41	0.2163	55.22	10.44	0.3388	27.58	0.0109	99.2488	0.509576	0.477853	0.0125709
	Old Nevado	BAF970	1	6.64	0.9225	58.82	7.36	0.4421	24.69	0.0103	98.9554	0.359474	0.586877	0.0536485
	Old Nevado	BAF970	6.39	5.73	0.4424	55.88	10.04	0.3863	27.45	0.0095	99.9443	0.479558	0.495281	0.0251608
	Old Nevado	BAF970	11.78	5.6	0.347	55.17	10.45	0.4337	27.59	0.022	99.6569	0.497688	0.482634	0.0196776
	Old Nevado	BAF970	17.17	5.72	0.3001	55.74	9.97	0.4549	27.1	0.0349	99.3551	0.482146	0.500574	0.0172802
	Old Nevado	BAF970	22.56	5.56	0.2452	55.21	10.37	0.4416	27.49	0.046	99.3908	0.500398	0.485513	0.0140883
	Old Nevado	BAF970	27.95	6.02	0.2786	56.44	9.6	0.4352	26.75	0.031	99.579	0.460969	0.523102	0.0159288
	Old Nevado	BAF970	33.34	5.82	0.2463	55.77	9.94	0.4301	27	0.0469	99.3036	0.478683	0.507194	0.014123
	Old Nevado	BAF970	38.73	5.91	0.2631	56.15	9.97	0.3613	26.9	0.0223	99.5851	0.475256	0.509811	0.0149332
	Old Nevado	BAF970	44.12	6.23	0.2985	56.94	9.23	0.3917	26.22	0.0414	99.402	0.442486	0.540475	0.017039
	Old Nevado	BAF970	49.51	5.68	0.2377	55.62	10.22	0.3659	27.2	0.0101	99.3703	0.491779	0.494602	0.0136191
	Old Nevado	BAF970	1	5.88	0.4135	56.1	9.73	0.324	26.19	0.0241	98.7275	0.466377	0.510024	0.0235994
	Old Nevado	BAF970	18.42	6.34	0.3109	56.9	9.2	0.3604	25.85	0.023	99.0152	0.437195	0.545213	0.0175918
	Old Nevado	BAF970	35.84	5.82	0.2345	55.83	10.02	0.322	26.52	0.0132	98.7773	0.481008	0.505588	0.0134038
	Old Nevado	BAF970	157.78	6.96	0.3437	58.55	7.85	0.1094	24.97	0.0083	98.8036	0.376422	0.603954	0.0196239
	Old Nevado	BAF970	175.2	7	0.3309	58.3	8.12	0.1423	25.27	0.0062	99.1751	0.383355	0.598043	0.0186013
	Old Nevado	BAF970	192.62	6.71	0.3246	58.18	8.22	0.1479	25.44	0	99.0257	0.396162	0.585211	0.0186273
	Old Nevado	BAF970	210.04	6.3	0.2802	56.96	9.1	0.142	26.09	0	98.91	0.43678	0.547206	0.0160137
	Old Nevado	BAF970	227.46	6.48	0.2971	57.49	8.88	0.1378	25.86	0.0038	99.1495	0.423661	0.559461	0.0168775
	Old Nevado	BAF970	262.3	7.13	0.3752	59.54	7.18	0.1178	25.43	0.007	99.7814	0.349742	0.628496	0.0217614
	Old Nevado	BAF970	279.72	7.11	0.3887	59.21	7.21	0.1091	25.37	0.0094	99.4188	0.351035	0.626432	0.0225336
	Old Nevado	BAF970	297.14	7.37	0.3828	59.5	7.13	0.1171	25.31	0.0203	99.8558	0.340777	0.637438	0.0217848
	Old Nevado	BAF970	314.56	6.89	0.3301	58.04	8.25	0.1106	26.23	0	99.8597	0.390784	0.590598	0.0186179
	Old Nevado	BAF970	331.98	6.83	0.3196	57.94	8.16	0.1293	25.88	0	99.2851	0.390425	0.591367	0.0182077
	Old Nevado	BAF970	349.4	7.06	0.3346	58.67	7.63	0.154	25.59	0	99.4723	0.36675	0.6141	0.0191501
	Old Nevado	BAF970	366.82	6.62	0.3241	57.76	8.27	0.1739	26.37	0	99.5455	0.400763	0.580536	0.0187009
	Old Nevado	BAF970	384.24	6.06	0.2429	56.56	9.38	0.2578	27.16	0.0002	99.728	0.454555	0.531429	0.0140156
	Old Nevado	BAF970	401.66	6.59	0.3204	57.86	8.45	0.3137	26.33	0	99.9479	0.407093	0.574528	0.0183793
	Old Nevado	BAF970	419.08	6.24	0.2605	56.44	9.36	0.2451	27.13	0.0186	99.7624	0.446517	0.538686	0.0147969
	Old Nevado	BAF970	436.5	6.04	0.2622	56.13	9.5	0.157	27.15	0	99.2697	0.458	0.526948	0.0150514
	Old Nevado	BAF970	453.92	6.48	0.2873	57.22	8.92	0.1245	26.81	0.007	99.8734	0.424995	0.558706	0.0162988
	Old Nevado	BAF970	471.34	6.9	0.33	58.25	8.14	0.1481	26.22	0.0138	100.008	0.387262	0.594044	0.0186937
	Old Nevado	BAF970	488.76	6.65	0.3138	58.02	8.23	0.1973	26.27	0.0314	99.7253	0.398785	0.58311	0.0181048
	Old Nevado	BAF970	506.18	6.1	0.2588	56.63	9.42	0.2433	27.23	0.0148	99.9304	0.453607	0.531554	0.0148386
	Old Nevado	BAF970	1	5.45	0.2691	55.38	10.52	0.3745	28.27	0.024	100.317	0.508142	0.476381	0.0154769
	Old Nevado	BAF970	19.49	6.65	0.2884	58.1	8.39	0.242	26.23	0.0232	99.9518	0.403998	0.579466	0.0165354
	Old Nevado	BAF970	37.98	5.69	0.2136	55.72	10.02	0.2934	27.62	0.0374	99.621	0.487091	0.500546	0.0123636
	Old Nevado	BAF970	56.47	5.18	0.1704	54.22	11.12	0.2908	28.75	0.0164	99.7842	0.537282	0.452915	0.0098032
	Old Nevado	BAF970	74.96	6.9	0.3436	59.2	7.49	0.244	25.47	0	99.6644	0.367417	0.612514	0.0200693
	Old Nevado	BAF970	93.45	7.85	0.4266	60.64	6.42	0.116	24.52	0.0245	100.033	0.303783	0.672182	0.0240353
	Old Nevado	BAF970	111.94	7.56	0.4123	60.73	6.38	0.1162	24.65	0.0182	99.8759	0.310436	0.665676	0.0238873
	Old Nevado	BAF970	130.43	7.74	0.4176	60.79	6.27	0.1035	24.65	0.0088	99.9946	0.301823	0.674241	0.0239357
	Old Nevado	BAF970	148.92	7.73	0.4084	60.82	6.3	0.0861	24.49	0	99.8345	0.303253	0.673339	0.0234073
	Old Nevado	BAF970	167.41	7.66	0.4191	61.29	6.15	0.071	24.62	0.0005	100.234	0.299843	0.675828	0.0243297
	Old Nevado	BAF970	185.9	7.64	0.3922	61.09	6.15	0.0925	24.57	0	99.9399	0.300843	0.676313	0.0228441
	Old Nevado	BAF970	204.39	7.78	0.4151	60.81	6.23	0.0967	24.44	0	99.7744	0.299474	0.676767	0.0237588
	Old Nevado	BAF970	222.88	7.67	0.3895	60.7	6.2	0.0831	24.4	0.0006	99.4489	0.301797	0.675628	0.0225752
	Old Nevado	BAF970	241.37	7.77	0.4018	60.67	6.29	0.0704	24.61	0	99.8511	0.30198	0.675052	0.0229688
	Old Nevado	BAF970	259.86	7.62	0.4013	60.69	6.09	0.1071	24.52	0.0088	99.468	0.299157	0.677371	0.0234721
	Old Nevado	BAF970	278.35	7.79	0.3965	60.56	6.15	0.0967	24.4	0.0013	99.4146	0.296827	0.680386	0.0227863
	Old Nevado	BAF970	296.84	6.92	0.3087	58.67	7.71	0.0834	25.84	0	99.5526	0.374268	0.607889	0.0178429
	Old Nevado	BAF970	315.33	6.95	0.2994	58.54	7.74	0.1132	26.05	0.0035	99.7094	0.374394	0.608362	0.0172441
	Old Nevado	BAF970	333.82	7.02	0.3088	58.97	7.52	0.071	25.75	0	99.6398	0.365203	0.61694	0.0178564
	Old Nevado	BAF970	352.31	7.09	0.2916	58.38	7.61	0.0825	25.82	0	99.2817	0.366086	0.617211	0.0167027
	Old Nevado	BAF970	370.8	7.11	0.2952	58.98	7.4	0.0787	25.81	0.0156	99.7204	0.358911	0.624041	0.0170479
	Old Nevado	BAF970	389.29	7.08	0.2839	58.35	7.6	0.0807	25.84	0.0066	99.2612	0.366261	0.617448	0.0162909
	Old Nevado	BAF970	407.78	6.99	0.2919	58.73	7.59	0.0863	25.99	0	99.7084	0.368682	0.614435	0.0168828
	Old Nevado	BAF970	426.27	6.88	0.3089	58.41	7.69	0.0763	26.14	0	99.5064	0.374975	0.60709	0.0179347
	Old Nevado	BAF970	444.76	6.75	0.2814	58.11	7.99	0.0819	26.24	0	99.4711	0.388996	0.594691	0.0163126
	Old Nevado	BAF970	1	5.76	0.294	56.25	9.64	0.3522	26.67	0.0174	99.0132	0.472236	0.510615	0.0171487
	Old Nevado	BAF970	15.75	5.8	0.2421	56.12	9.68	0.3354	26.62	0.0224	98.82	0.473023	0.51289	0.0140865
	Old Nevado	BAF970	30.5	6.48	0.2923	57.78	8.51	0.1936	25.7	0.0008	98.9757	0.413419	0.569673	0.0169079
	Old Nevado	BAF970	60	6.92	0.3166	58.63	7.86	0.1484	25.03	0.0156	98.9298	0.37862	0.603221	0.018159
	Old Nevado	BAF970	74.75	7.71	0.4243	60.74	6.21	0.1481	23.73	0.0012	99.0203	0.300473	0.675083	0.0244448
	Old Nevado	BAF970	89.5	6.81	0.3074	58.25	8.02	0.1658	25.17	0.0243	98.7761	0.38726	0.595066	0.0176739
	Old Nevado	BAF970	104.25	7.52	0.4151	60.68	6.38	0.136	24.21	0	99.3438	0.311483	0.664386	0.0241306
	Old Nevado	BAF970	119	7.53	0.4199	60.69	6.41	0.1609	24.06	0	99.3255	0.312128	0.663527	0.0243456
	Old Nevado	BAF970	133.75	7.63	0.4198	60.56	6.43	0.1535	23.84	0.0062	99.074	0.310069	0.665827	0.0241041
	Old Nevado	BAF970	148.5	7.64	0.4204	60.82	6.32	0.1275	23.95	0.0045	99.2825	0.306111	0.669644	0.0242452
	Old Nevado	BAF970	163.25	7.87	0.4496	61.36	5.9	0.1316	23.4	0	99.1156	0.28534	0.68877	0.0258903
	Old Nevado	BAF970	192.75	7.57	0.4456	60.92	6.19	0.1431	23.91	0	99.1958	0.303142	0.670874	0.0259838
	Old Nevado	BAF970	207.5	6.72	0.3079	58	8.11	0.1117	25.25	0.0009	98.5294	0.392978	0.589258	0.0177647
	Old Nevado	BAF970	1	6.04	0.7077	56.88	8.74	0.501	25.74	0.0207	98.6538	0.426075	0.532845	0.0410795
	Old Nevado	BAF970	85.6	5.76	0.2352	56.08	9.83	0.3451	27.07	0.0439	99.4187	0.47873	0.507632	0.0136388
	Old Nevado	BAF970	99.7	6.51	0.3156	58.02	8.3	0.3978	26.2	0.0127	99.8209	0.40574	0.57589	0.0183699
	Old Nevado	BAF970	113.8	5.55	0.2296	55.55	10.22	0.3294	27.75	0.0354	99.7075	0.497643	0.489045	0.0133119
	Old Nevado	BAF970	127.9	5.74	0.2433	56.19	9.78	0.351	27.25	0.0139	99.5748	0.478077	0.507762	0.0141613
	Old Nevado	BAF970	142	6.52	0.2977	57.86	8.63	0.3963	26.43	0.0333	100.196	0.415238	0.567706	0.0170556
	Old Nevado	BAF970	156.1	5.66	0.2269	55.99	10.12	0.3398	27.61	0.0105	100.006	0.490484	0.496421	0.0130942
	Old Nevado	BAF970	170.2	6.46	0.3075	58.34	8.38	0.36	26.18	0.0355	100.088	0.410054	0.57203	0.0179161
	Old Nevado	BAF970	184.3	6.02	0.2378	56.35	9.6	0.4006	27.17	0.0436	99.8454	0.462047	0.524325	0.0136279
	Old Nevado	BAF970	198.4	5.45	0.2134	55.51	10.43	0.3926	27.82	0.0324	99.9038	0.507627	0.480006	0.0123668
	Domes	Cerro Gordo	14.42	5.53	0.1621	54.93	10.77	0.4017	28.11	0.0343	99.9595	0.513585	0.477211	0.00920408
	Domes	Cerro Gordo	43.72	5.85	0.1722	55.06	10.55	0.3937	28.01	0.015	100.108	0.494345	0.496047	0.00960753
	Domes	Cerro Gordo	57.96	6.79	0.2016	57.04	9.2	0.3789	26.83	0	100.466	0.423428	0.565524	0.011048
	Domes	Cerro Gordo	29.48	5.75	0.1614	55.11	10.72	0.3753	28.02	0.0207	100.193	0.502872	0.488113	0.00901503
	Domes	Cerro Gordo	72.2	7.18	0.2515	58.2	8.38	0.3614	26.01	0.0122	100.453	0.386664	0.599519	0.0138175
	Domes	Cerro Gordo	15.24	5.78	0.1613	55.05	10.67	0.3439	28.22	0.017	100.296	0.500429	0.490563	0.00900769
	Domes	Cerro Gordo	37.12	5.62	0.1923	57.79	9.73	0.3431	25.92	0.0251	99.6738	0.48338	0.505245	0.0113751
	Domes	Cerro Gordo	31.24	6.29	0.1847	55.64	10.2	0.3394	27.85	0.0102	100.561	0.467837	0.522076	0.010087
	Domes	Cerro Gordo	190.42	5.55	0.2344	55.56	10.17	0.3353	27.84	0.0029	99.7297	0.496278	0.490102	0.0136196
	Domes	Cerro Gordo	27.84	5.37	0.1571	54.53	11.12	0.3338	28.58	0.0335	100.162	0.5289	0.462203	0.00889705
	Domes	Cerro Gordo	20.6	6.24	0.194	55.91	10.09	0.3289	27.57	0.0207	100.369	0.466847	0.522465	0.0106877
	Domes	Cerro Gordo	100.68	7.3	0.2308	58.15	8.37	0.3177	25.88	0.0035	100.309	0.382977	0.604449	0.0125743
	Domes	Cerro Gordo	10.8	6.16	0.1735	55.88	9.97	0.3169	27.64	0.0312	100.171	0.467551	0.522761	0.00968799
	Domes	Cerro Gordo	1	6.51	0.206	56.8	9.46	0.3136	26.81	0.0219	100.139	0.440288	0.548296	0.011416
	Domes	Cerro Gordo	30.4	6.1	0.186	55.62	10.33	0.3128	27.84	0.0108	100.436	0.478458	0.511284	0.0102579
	Domes	Cerro Gordo	228.84	6.96	0.2214	57.73	8.67	0.3123	26.13	0.0022	100.054	0.40272	0.585035	0.0122451
	Domes	Cerro Gordo	19.06	6.15	0.1972	55.97	10.14	0.3066	27.28	0.0148	100.066	0.47154	0.517541	0.0109191
	Domes	Cerro Gordo	16.12	6.07	0.1694	55.64	10.14	0.3032	27.81	0.0388	100.19	0.475473	0.515069	0.00945806
	Domes	Cerro Gordo	1	5.98	0.1607	55.33	10.32	0.2989	28.01	0.007	100.112	0.483759	0.507271	0.00896946
	Domes	Cerro Gordo	200.36	6.73	0.2157	57.42	8.86	0.2974	26.54	0.0092	100.102	0.416048	0.571892	0.0120604
	Domes	Cerro Gordo	79.4	6.24	0.1809	56.01	9.88	0.2965	27.79	0.0045	100.445	0.461953	0.527976	0.0100712
	Domes	Cerro Gordo	1	5.95	0.1803	55.88	10.02	0.2959	27.5	0.041	99.8871	0.477098	0.51268	0.010222
	Domes	Cerro Gordo	271.56	7.07	0.2349	58.01	8.44	0.2937	25.95	0.0247	100.073	0.392307	0.594692	0.0130007
	Domes	Cerro Gordo	257.32	7.29	0.2425	58.62	8.07	0.2936	25.61	0.0015	100.137	0.374462	0.61214	0.0133982
	Domes	Cerro Gordo	41.26	5.44	0.1696	54.57	11.06	0.2907	28.39	0.0339	99.9829	0.524014	0.466418	0.00956785
	Domes	Cerro Gordo	114.92	7.06	0.2529	57.99	8.36	0.2897	25.69	0.0136	99.7268	0.389978	0.595975	0.014047
	Domes	Cerro Gordo	59.8	6.12	0.1811	56.14	10.03	0.2865	27.76	0.005	100.539	0.470438	0.519448	0.010114
	Domes	Cerro Gordo	171.88	7.17	0.2298	57.99	8.46	0.2865	26.03	0.0245	100.241	0.389706	0.597689	0.0126043
	Domes	Cerro Gordo	214.6	6.91	0.2187	57.36	8.87	0.2853	26.3	0.0171	99.9984	0.409985	0.577979	0.0120363
	Domes	Cerro Gordo	186.12	7.02	0.2306	57.78	8.5	0.2839	25.89	0.0201	99.7664	0.395751	0.591465	0.0127839
	Domes	Cerro Gordo	1	6.17	0.2117	56.46	9.84	0.2826	27.61	0.0311	100.644	0.462896	0.525246	0.011858
	Domes	Cerro Gordo	40.2	6.73	0.216	56.96	9.33	0.2814	27.05	0.02	100.605	0.428651	0.559533	0.0118162
	Domes	Cerro Gordo	1	6.03	0.1808	55.73	10.24	0.2798	27.84	0.014	100.357	0.479236	0.510689	0.0100751
	Domes	Cerro Gordo	89.2	6.32	0.1784	56.1	9.87	0.2793	27.75	0.0104	100.537	0.458659	0.53147	0.00987116
	Domes	Cerro Gordo	46.36	5.7	0.155	54.93	10.67	0.2793	28.43	0.002	100.209	0.504029	0.487253	0.00871813
	Domes	Cerro Gordo	129.16	7.24	0.243	58.18	8.31	0.2792	25.73	0.0105	100.044	0.382931	0.603736	0.013333
	Domes	Cerro Gordo	55.12	6.13	0.1999	56.52	9.35	0.2785	27.16	0.0312	99.6982	0.452105	0.536386	0.0115091
	Domes	Cerro Gordo	157.64	7	0.2405	58.01	8.39	0.2766	25.97	0.0164	99.9518	0.393089	0.593494	0.0134167
	Domes	Cerro Gordo	1	6.6	0.2331	58.09	8.73	0.2762	26.92	0.0108	100.861	0.416685	0.570068	0.0132476
	Domes	Cerro Gordo	243.08	7.2	0.2391	58.23	8.22	0.2724	25.74	0.0128	99.9712	0.381722	0.605058	0.0132207
	Domes	Cerro Gordo	143.4	7.2	0.232	58.22	8.29	0.2694	25.98	0.0083	100.269	0.383875	0.603333	0.0127916
	Domes	Cerro Gordo	123.67	5.91	0.1837	55.05	10.54	0.2592	28	0.0095	99.9602	0.491292	0.498512	0.0101955
	Domes	Cerro Gordo	1	6.21	0.1865	55.76	10.13	0.258	27.68	0.0294	100.292	0.469202	0.520512	0.0102856
	Domes	Cerro Gordo	14.63	6.59	0.2112	56.59	9.47	0.2576	27.11	0.0052	100.239	0.437476	0.550907	0.0116171
	Domes	Cerro Gordo	110.04	5.9	0.1614	54.93	10.63	0.2528	28.11	0.0156	100.029	0.494442	0.496619	0.00893895
	Domes	Cerro Gordo	203.95	5.79	0.1725	55.38	10.26	0.2483	28.17	0.0237	100.07	0.489898	0.500295	0.00980727
	Domes	Cerro Gordo	91.72	6	0.1709	55.56	10.27	0.2466	28.05	0.0077	100.326	0.481453	0.509007	0.00953952
	Domes	Cerro Gordo	50	6.66	0.2226	57.16	9.12	0.2463	26.86	0.0126	100.287	0.425429	0.562207	0.012364
	Domes	Cerro Gordo	54.68	6.29	0.2084	56.81	9.53	0.2426	27.22	0.0264	100.37	0.450363	0.53791	0.0117265
	Domes	Cerro Gordo	69.6	6.37	0.1898	56.45	9.63	0.2381	27.43	0.0065	100.385	0.450351	0.53908	0.0105687
	Domes	Cerro Gordo	41.59	6.22	0.2128	56.71	9.24	0.2321	26.98	0.0114	99.619	0.445317	0.542471	0.0122115
	Domes	Cerro Gordo	14.53	5.68	0.1829	55.33	10.29	0.2269	27.99	0.0176	99.7334	0.495034	0.494489	0.0104769
	Domes	Cerro Gordo	28.06	5.93	0.1847	56.43	9.66	0.2237	27.4	0.0115	99.853	0.468681	0.520648	0.0106701
	Domes	Cerro Gordo	95.71	6.36	0.2025	56.35	9.39	0.2172	27.27	0.0025	99.8544	0.444174	0.54442	0.0114055
	Domes	Cerro Gordo	68.1	6.74	0.2461	57.83	8.94	0.216	26.65	0.0217	100.644	0.417174	0.569152	0.0136739
	Domes	Cerro Gordo	28.26	5.7	0.1701	54.82	10.82	0.2153	28.41	0.0126	100.174	0.50709	0.483417	0.00949212
	Domes	Cerro Gordo	81.52	6.61	0.2176	57.18	9.18	0.2147	26.6	0	100.006	0.428957	0.558936	0.0121068
	Domes	Cerro Gordo	344.14	6.22	0.1823	56.07	10.13	0.2141	27.47	0.0082	100.347	0.468917	0.521035	0.0100479
	Domes	Cerro Gordo	176.89	5.55	0.167	55.13	10.53	0.212	28.18	0.023	99.8279	0.506926	0.483502	0.00957267
	Domes	Cerro Gordo	326.08	6.46	0.1942	56.39	9.86	0.2117	26.87	0.0009	99.9979	0.452679	0.536705	0.0106161
	Domes	Cerro Gordo	109.24	6.38	0.2119	56.98	9.27	0.2076	27.04	0.0031	100.106	0.440009	0.548015	0.0119761
	Domes	Cerro Gordo	217.48	5.91	0.1679	56.46	10.16	0.2044	27.99	0.0178	100.95	0.48255	0.507955	0.00949511
	Domes	Cerro Gordo	106.84	5.95	0.1623	55.54	10.38	0.2027	28.19	0.0106	100.466	0.486398	0.504546	0.00905554
	Domes	Cerro Gordo	152.2	5.62	0.1586	54.63	10.98	0.2016	28.75	0	100.367	0.514552	0.476598	0.00884975
	Domes	Cerro Gordo	73.24	6.33	0.2124	56.24	9.89	0.2012	27.11	0.001	100.017	0.457916	0.530374	0.0117097
	Domes	Cerro Gordo	68.65	6.5	0.2161	57.19	8.96	0.2008	26.7	0.0117	99.8142	0.427076	0.56066	0.0122646
	Domes	Cerro Gordo	121.78	6.72	0.2307	57.48	9.04	0.2003	26.7	0.0271	100.428	0.420947	0.566262	0.0127911
	Domes	Cerro Gordo	76.6	6.54	0.1907	56.64	9.42	0.1979	27.26	0.0057	100.287	0.438506	0.550924	0.01057
	Domes	Cerro Gordo	135.2	6.3	0.1993	56.69	9.5	0.197	27.16	0.0056	100.098	0.449428	0.539345	0.0112265
	Domes	Cerro Gordo	122.77	6.66	0.2183	57.51	8.75	0.1957	26.61	0.0202	99.9966	0.415439	0.57222	0.0123411
	Domes	Cerro Gordo	121.96	6.19	0.1762	55.63	10.28	0.1954	27.83	0.0048	100.33	0.473921	0.516407	0.00967207
	Domes	Cerro Gordo	258.07	7.27	0.237	58.04	8.43	0.1952	25.95	0	100.148	0.385491	0.601604	0.0129044
	Domes	Cerro Gordo	162.04	6.7	0.216	57.4	9.11	0.1947	27.03	0.0042	100.662	0.423885	0.564148	0.011967
	Domes	Cerro Gordo	231.01	6.22	0.1874	56.22	9.74	0.1946	27.42	0.003	100.037	0.459022	0.530462	0.0105159
	Domes	Cerro Gordo	308.02	6.31	0.1686	55.98	10.31	0.1941	27.39	0.0097	100.386	0.470143	0.520703	0.0091544
	Domes	Cerro Gordo	312.19	7.25	0.236	57.99	8.48	0.1916	26.09	0.0134	100.257	0.387554	0.599603	0.0128425
	Domes	Cerro Gordo	271.9	6.44	0.1789	55.99	10.14	0.1899	26.81	0.012	99.7645	0.460762	0.529558	0.00967944
	Domes	Cerro Gordo	61.48	7.08	0.2428	57.57	8.69	0.1888	26.84	0.0122	100.657	0.398784	0.58795	0.0132668
	Domes	Cerro Gordo	273.16	7.35	0.2426	58.66	8.02	0.1886	25.99	0.0088	100.494	0.371131	0.615502	0.0133673
	Domes	Cerro Gordo	149.83	6.82	0.211	57.72	8.73	0.1884	26.75	0	100.458	0.409419	0.578798	0.0117825
	Domes	Cerro Gordo	244.54	6.24	0.2027	56.62	9.44	0.1874	27.26	0	99.9816	0.450093	0.538399	0.0115076
	Domes	Cerro Gordo	91.3	6.79	0.1951	56.94	9.41	0.1871	26.8	0.0107	100.339	0.429099	0.560308	0.0105932
	Domes	Cerro Gordo	94.94	6.3	0.1947	56.68	9.7	0.1823	27.29	0.011	100.369	0.454706	0.534427	0.0108674
	Domes	Cerro Gordo	175.46	6.54	0.2144	57.03	9.19	0.1819	27.04	0.0068	100.208	0.431856	0.556148	0.0119963
	Domes	Cerro Gordo	108.36	6.83	0.237	57.62	8.83	0.1797	26.41	0	100.133	0.411234	0.575623	0.0131425
	Domes	Cerro Gordo	167.32	5.6	0.1361	54.52	11.03	0.179	28.65	0.0159	100.168	0.51721	0.475191	0.00759889
	Domes	Cerro Gordo	202.3	6.52	0.2132	56.9	9.43	0.1781	27.16	0	100.424	0.438959	0.549224	0.0118168
	Domes	Cerro Gordo	188.88	6.48	0.2077	56.83	9.43	0.1775	27.31	0.0149	100.455	0.440578	0.547867	0.0115544
	Domes	Cerro Gordo	163.36	6.74	0.2277	57.53	8.79	0.176	26.84	0.006	100.343	0.413491	0.573755	0.0127538
	Domes	Cerro Gordo	258.04	7.19	0.2445	58.32	8.07	0.1757	25.82	0.0028	99.8251	0.377591	0.608788	0.0136216
	Domes	Cerro Gordo	41.89	7.41	0.2783	58.36	8	0.1752	25.99	0.0012	100.22	0.367973	0.616785	0.0152419
	Domes	Cerro Gordo	148.62	6.73	0.2373	57.34	8.86	0.1745	26.46	0.0154	99.8288	0.415546	0.571202	0.0132521
	Domes	Cerro Gordo	217.72	6.96	0.2163	57.68	8.77	0.1727	26.16	0.0031	99.9653	0.405595	0.582494	0.0119111
	Domes	Cerro Gordo	229.14	6.43	0.2097	56.76	9.4	0.1722	27.09	0	100.076	0.441613	0.546656	0.0117304
	Domes	Cerro Gordo	271.6	7.15	0.2346	57.91	8.55	0.1714	25.96	0.0064	100.024	0.392775	0.594392	0.0128324
	Domes	Cerro Gordo	82.18	6.45	0.2128	57.29	9.12	0.1675	26.82	0	100.091	0.433347	0.554613	0.0120396
	Domes	Cerro Gordo	212.68	7.72	0.2786	59.44	7.51	0.1656	25.48	0	100.596	0.344305	0.640486	0.0152085
	Domes	Cerro Gordo	235.78	6.79	0.1947	56.9	9.28	0.1642	26.64	0	100	0.425704	0.563662	0.0106347
	Domes	Cerro Gordo	82.78	5.19	0.1416	53.57	11.87	0.1639	29.2	0.0108	100.202	0.553882	0.438251	0.00786739
	Domes	Cerro Gordo	136.3	7.7	0.2989	59.99	6.96	0.1639	25.04	0.0039	100.168	0.327529	0.655723	0.0167482
	Domes	Cerro Gordo	255.98	6.74	0.2318	57.61	9.12	0.1628	26.95	0.0032	100.862	0.422361	0.564857	0.0127821
	Domes	Cerro Gordo	242.56	6.83	0.2333	57.5	8.83	0.1619	26.88	0.007	100.442	0.411319	0.575741	0.01294
	Domes	Cerro Gordo	197.56	7.73	0.2826	59.53	7.28	0.1617	25.4	0.0057	100.421	0.33696	0.647465	0.0155747
	Domes	Cerro Gordo	55.52	6.3	0.1922	56.12	9.92	0.1608	27.5	0	100.222	0.460335	0.529045	0.0106198
	Domes	Cerro Gordo	215.72	6.56	0.2142	56.91	9.27	0.1572	27.17	0	100.292	0.433254	0.554825	0.0119202
	Domes	Cerro Gordo	285.13	7.1	0.2354	57.81	8.55	0.1566	26.15	0.0077	100.022	0.394397	0.592673	0.0129293
	Domes	Cerro Gordo	137.3	5.17	0.1364	53.59	12.01	0.1536	29.33	0.0097	100.459	0.557873	0.434583	0.00754411
	Domes	Cerro Gordo	298.66	7.16	0.228	57.87	8.48	0.1508	25.84	0	99.7644	0.390632	0.596862	0.0125057
	Domes	Cerro Gordo	109.36	7.04	0.2284	58.01	8.77	0.1499	26.37	0	100.595	0.402631	0.584884	0.0124855
	Domes	Cerro Gordo	253.84	6.57	0.1943	56.64	9.53	0.1497	26.82	0.0028	99.9207	0.440172	0.549142	0.0106857
	Domes	Cerro Gordo	242.92	7.41	0.2789	59.04	7.82	0.1495	25.47	0	100.196	0.362685	0.621913	0.0154018
	Domes	Cerro Gordo	288.28	7.38	0.2541	58.92	7.97	0.1483	25.87	0	100.566	0.36851	0.6175	0.0139893
	Domes	Cerro Gordo	182.44	8.17	0.3096	60.32	6.84	0.1454	25.1	0.0067	100.91	0.311004	0.672235	0.0167614
	Domes	Cerro Gordo	127.42	6.65	0.2064	57.18	9.28	0.1449	26.64	0	100.128	0.430431	0.55817	0.011399
	Domes	Cerro Gordo	150.93	5.18	0.1299	53.45	12	0.1442	29.27	0	100.202	0.5574	0.435416	0.00718448
	Domes	Cerro Gordo	96.41	5.11	0.1402	53.22	11.79	0.1397	29.16	0.0216	99.6263	0.556024	0.436104	0.00787279
	Domes	Cerro Gordo	145.48	7.44	0.2487	58.77	8.11	0.1387	25.77	0	100.496	0.370832	0.615628	0.0135404
	Domes	Cerro Gordo	191.82	7.5	0.2736	58.15	8.15	0.1357	25.95	0.0181	100.201	0.369648	0.615576	0.0147757
	Domes	Cerro Gordo	181.6	7.26	0.2519	58.39	8.25	0.13	25.64	0	99.924	0.380398	0.605773	0.0138297
	Domes	Cerro Gordo	69.15	5.51	0.142	54.23	11.32	0.1291	28.9	0	100.254	0.52749	0.464631	0.00787874
	Domes	Cerro Gordo	178.19	5.95	0.1829	55.02	10.48	0.1291	28.18	0.0054	99.9764	0.488235	0.501619	0.0101457
	Domes	Cerro Gordo	199.66	7.16	0.2489	58.19	8.51	0.1289	25.82	0	100.066	0.391025	0.595357	0.0136176
	Domes	Cerro Gordo	227.8	7.49	0.2675	59.22	7.55	0.1258	25.34	0.0223	100.032	0.352431	0.632701	0.014868
	Domes	Cerro Gordo	164.56	5.3	0.1334	53.53	11.68	0.1161	29.01	0	99.7746	0.545034	0.447554	0.00741203
	Recent Nevado	Crater 31	11.87	5.96	0.1769	55.74	10.18	0.372	28.18	0.0096	100.671	0.480733	0.509321	0.00994683
	Recent Nevado	Crater 31	22.74	5.93	0.1605	55.75	10.39	0.342	28.29	0.0281	100.914	0.487514	0.503519	0.00896701
	Recent Nevado	Crater 31	1	6.64	0.2306	57.24	8.94	0.3365	27.31	0.013	100.736	0.421092	0.565975	0.012933
	Recent Nevado	Crater 31	1	6.4	0.2155	56.53	9.22	0.3339	27.46	0.0309	100.245	0.437834	0.549981	0.012185
	Recent Nevado	Crater 31	1	6.19	0.1877	56.39	9.85	0.3335	27.85	0.02	100.855	0.462983	0.526512	0.0105049
	Recent Nevado	Crater 31	37.45	6.47	0.6393	60.53	7.02	0.3251	24.06	0.0138	99.19	0.360194	0.600749	0.0390575
	Recent Nevado	Crater 31	7.5	6.46	0.2038	56.58	9.33	0.3248	27.43	0.0328	100.371	0.438793	0.549794	0.0114126
	Recent Nevado	Crater 31	1	6.53	0.2106	57.26	8.96	0.3058	26.54	0.0096	99.8514	0.426106	0.561969	0.0119253
	Recent Nevado	Crater 31	13.7	5.91	0.175	56.03	9.92	0.291	27.72	0.0464	100.104	0.47639	0.513603	0.0100067
	Recent Nevado	Crater 31	14	6.29	0.1841	56.63	9.5	0.2897	27.61	0.0166	100.536	0.450199	0.539413	0.0103881
	Recent Nevado	Crater 31	1	5.8	0.1737	54.24	10.56	0.286	28.19	0.0168	99.2724	0.496645	0.493628	0.00972709
	Recent Nevado	Crater 31	13.15	6.16	0.1854	55.87	9.54	0.2833	27.3	0.0114	99.4127	0.456283	0.533158	0.0105584
	Recent Nevado	Crater 31	13.1	6.36	0.1825	56.9	9.55	0.2793	27.74	0.0184	101.042	0.448851	0.540935	0.0102132
	Recent Nevado	Crater 31	1	6.47	0.2213	56.57	9.3	0.2736	27.55	0.0266	100.437	0.437199	0.550414	0.0123873
	Recent Nevado	Crater 31	25.3	5.8	0.1625	55.04	10.32	0.2646	27.91	0.0364	99.5336	0.49121	0.49958	0.00920963
	Recent Nevado	Crater 31	11.4	6.39	0.2232	57.05	9.08	0.2555	27.72	0.0321	100.76	0.434257	0.553033	0.0127103
	Recent Nevado	Crater 31	16.11	6.19	0.2006	56.14	9.77	0.2513	27.95	0.0048	100.552	0.460622	0.528117	0.0112611
	Recent Nevado	Crater 31	2	6.65	0.1997	56.76	9.25	0.2464	27.58	0	100.723	0.429797	0.559155	0.0110484
	Recent Nevado	Crater 31	1	6.43	0.202	56.93	9.38	0.2439	27.54	0.002	100.74	0.441278	0.547406	0.0113152
	Recent Nevado	Crater 31	1	6.4	0.189	56.04	9.28	0.2438	27.01	0.0322	99.2281	0.440089	0.549239	0.0106722
	Recent Nevado	Crater 31	1	6.3	0.2121	56.36	9.48	0.2308	27.97	0	100.578	0.448583	0.539467	0.0119502
	Recent Nevado	Crater 31	21.8	6.72	0.2109	57.25	9.15	0.229	27.29	0	100.902	0.424361	0.563992	0.0116464
	Recent Nevado	Crater 31	1	6.91	0.2401	57.2	8.69	0.2237	27.28	0.0169	100.561	0.404555	0.582136	0.0133092
	Recent Nevado	Crater 31	26.4	6.34	0.1953	56.92	9.17	0.2237	27.13	0.0022	100.001	0.439269	0.549591	0.0111395
	Recent Nevado	Crater 31	25.2	6.73	0.2034	57.92	8.84	0.2222	27.3	0	101.226	0.415785	0.572824	0.0113912
	Recent Nevado	Crater 31	1	7.15	0.2415	58.29	8.38	0.216	26.62	0.0087	100.936	0.387848	0.598843	0.0133087
	Recent Nevado	Crater 31	32.2	6.5	0.2232	57.15	9.25	0.2082	27.42	0.01	100.797	0.434714	0.552796	0.0124899
	Recent Nevado	Crater 31	15.32	6.99	0.2443	57.75	8.43	0.2067	26.97	0.0388	100.63	0.394475	0.591913	0.0136118
	Recent Nevado	Crater 31	39.1	6.83	0.2252	57.9	8.57	0.2065	26.48	0.0087	100.251	0.404285	0.583065	0.0126496
	Recent Nevado	Crater 31	77.2	6.41	0.1887	55.69	9.31	0.2054	27.9	0	99.7238	0.440514	0.548855	0.0106312
	Recent Nevado	Crater 31	128	6.46	0.1809	55.73	9.2	0.2007	27.79	0.0071	99.6006	0.435903	0.553891	0.0102057
	Recent Nevado	Crater 31	89.9	6.7	0.2199	56.46	8.68	0.1987	27.22	0	99.5109	0.412032	0.575539	0.012429
	Recent Nevado	Crater 31	64.5	6.76	0.2083	56.54	8.77	0.1929	27.08	0.0073	99.5914	0.412684	0.575645	0.011671
	Recent Nevado	Crater 31	84.82	6.82	0.2256	56.84	8.7	0.1918	27.02	0	99.8253	0.408254	0.579141	0.0126052
	Recent Nevado	Crater 31	102.6	6.58	0.2005	55.9	9.17	0.1916	27.69	0	99.744	0.430192	0.558609	0.0111997
	Recent Nevado	Crater 31	24.08	7.7	0.2599	59.16	7.75	0.1909	26.25	0.0052	101.326	0.352375	0.633554	0.0140705
	Recent Nevado	Crater 31	15.95	6.9	0.2481	57.17	8.45	0.1905	26.77	0	99.7492	0.397987	0.588099	0.0139136
	Recent Nevado	Crater 31	42.91	6.63	0.206	56.39	9.17	0.1879	27.59	0.002	100.212	0.428242	0.560303	0.0114548
	Recent Nevado	Crater 31	140.7	6.74	0.2022	56.11	8.71	0.1878	27.36	0.0073	99.3284	0.411866	0.576749	0.0113847
	Recent Nevado	Crater 31	270.1	7.36	0.2799	58.92	7.46	0.1868	25.7	0	99.9363	0.353351	0.630863	0.015786
	Recent Nevado	Crater 31	28.94	7.03	0.2278	57.38	8.37	0.1858	26.98	0.0085	100.215	0.3918	0.595503	0.0126968
	Recent Nevado	Crater 31	51.8	7.05	0.2319	58.17	8.05	0.1852	26.7	0	100.4	0.381806	0.605098	0.0130963
	Recent Nevado	Crater 31	166.1	6.41	0.1818	55.62	9.26	0.1833	27.5	0	99.1618	0.439359	0.550371	0.0102708
	Recent Nevado	Crater 31	98.79	6.76	0.2099	56.6	8.93	0.1781	27.45	0	100.163	0.417036	0.571292	0.0116717
	Recent Nevado	Crater 31	31.22	6.55	0.21	56.94	9.05	0.1765	27.49	0.0049	100.486	0.427833	0.560346	0.0118208
	Recent Nevado	Crater 31	129.88	5.92	0.1719	55.21	10.14	0.176	28.51	0	100.156	0.481535	0.508745	0.00972
	Recent Nevado	Crater 31	168.64	6.85	0.2442	58.04	8.45	0.1756	26.38	0.0124	100.192	0.399778	0.586465	0.0137565
	Recent Nevado	Crater 31	115.3	6.5	0.1947	55.99	8.95	0.1745	27.58	0	99.4165	0.427322	0.56161	0.0110688
	Recent Nevado	Crater 31	158.95	6.23	0.1454	55.32	9.62	0.1731	27.6	0	99.1438	0.456636	0.535146	0.00821789
	Recent Nevado	Crater 31	178.8	7.03	0.2272	57.47	8.16	0.1708	26.67	0	99.7367	0.385775	0.601435	0.0127895
	Recent Nevado	Crater 31	153.4	6.55	0.1909	56.02	8.87	0.1705	27.47	0.0089	99.3149	0.423382	0.565769	0.0108496
	Recent Nevado	Crater 31	70.24	7.22	0.2314	57.88	8.4	0.1696	26.77	0	100.682	0.386366	0.600961	0.0126731
	Recent Nevado	Crater 31	61.75	6.51	0.1694	56.71	8.91	0.1684	27.12	0.013	99.637	0.426471	0.563874	0.00965442
	Recent Nevado	Crater 31	56.88	6.94	0.2427	57.08	8.04	0.1673	26.29	0	98.7938	0.384914	0.601251	0.013835
	Recent Nevado	Crater 31	61.44	7.08	0.2305	58.21	8.28	0.1659	26.68	0.0058	100.671	0.38752	0.599635	0.0128451
	Recent Nevado	Crater 31	45.85	7.05	0.2548	57.29	8.21	0.165	26.71	0.0031	99.7023	0.385967	0.59977	0.0142629
	Recent Nevado	Crater 31	154.67	6.96	0.2279	57.89	8.41	0.1637	26.24	0	99.9337	0.395274	0.591972	0.012754
	Recent Nevado	Crater 31	285.05	8.23	0.3987	61.03	5.78	0.1623	24.34	0	99.9558	0.273312	0.70424	0.022448
	Recent Nevado	Crater 31	29.64	7.15	0.2563	58.33	7.98	0.1622	26.61	0.0071	100.522	0.375989	0.609632	0.0143788
	Recent Nevado	Crater 31	58.28	6.76	0.2074	57.14	8.78	0.1617	27.33	0	100.416	0.412981	0.575403	0.0116157
	Recent Nevado	Crater 31	171.1	6.12	0.1441	55.24	9.76	0.1614	27.72	0.01	99.1637	0.464618	0.527214	0.00816791
	Recent Nevado	Crater 31	116.4	6.33	0.1754	56.03	9.97	0.1602	28.19	0	100.871	0.460853	0.529493	0.00965379
	Recent Nevado	Crater 31	121.88	7.71	0.2733	59.38	7.28	0.1601	25.91	0.0052	100.744	0.337699	0.647206	0.0150952
	Recent Nevado	Crater 31	140.7	6.79	0.2297	57.88	8.57	0.159	26.96	0.0109	100.636	0.405568	0.581489	0.0129433
	Recent Nevado	Crater 31	196.58	6.66	0.2369	57.44	8.67	0.1579	26.76	0.0094	99.9504	0.412775	0.573796	0.0134295
	Recent Nevado	Crater 31	172.84	5.95	0.1543	55.17	10.12	0.1573	28.5	0.0177	100.072	0.480281	0.511	0.0087193
	Recent Nevado	Crater 31	47.16	7.69	0.2693	59	7.5	0.1573	26.03	0.0046	100.688	0.345039	0.64021	0.0147518
	Recent Nevado	Crater 31	14.97	7.65	0.2861	59.03	7.48	0.1561	26.13	0	100.768	0.345268	0.639007	0.0157244
	Recent Nevado	Crater 31	60.8	6.47	0.202	55.9	9.3	0.1553	27.57	0.0005	99.6259	0.437672	0.551009	0.0113192
	Recent Nevado	Crater 31	30.9	7.07	0.2368	57.42	8.08	0.1548	26.41	0.0206	99.435	0.381924	0.604748	0.0133275
	Recent Nevado	Crater 31	112.76	6.99	0.2346	57.39	8.32	0.1539	26.85	0.0001	99.952	0.391555	0.595299	0.0131461
	Recent Nevado	Crater 31	72.6	6.63	0.2244	57.02	8.73	0.1536	27.25	0	100.03	0.415813	0.571461	0.0127265
	Recent Nevado	Crater 31	139.48	6.68	0.1927	56.99	9.12	0.1533	27.18	0.0012	100.322	0.425418	0.563879	0.0107029
	Recent Nevado	Crater 31	158.52	5.75	0.1551	55.08	10.21	0.1527	28.78	0	100.145	0.490865	0.500257	0.00887868
	Recent Nevado	Crater 31	185.64	5.49	0.1297	54.69	11.18	0.1519	29.08	0.0063	100.754	0.525641	0.467099	0.00726086
	Recent Nevado	Crater 31	46.33	7.33	0.2549	58.89	7.82	0.1517	26.48	0.0095	100.956	0.365624	0.620185	0.0141905
	Recent Nevado	Crater 31	230.12	8.03	0.3177	60.23	6.51	0.1505	25.14	0.0009	100.384	0.303927	0.678412	0.0176607
	Recent Nevado	Crater 31	126.73	7.04	0.2298	57.25	8.42	0.1502	27.12	0.0063	100.233	0.392845	0.594389	0.0127661
	Recent Nevado	Crater 31	210.3	5.73	0.1706	55.12	10.51	0.15	28.68	0	100.377	0.498522	0.491842	0.00963523
	Recent Nevado	Crater 31	86.92	6.46	0.1977	56.53	9.28	0.1499	27.68	0.018	100.316	0.43762	0.551279	0.0111009
	Recent Nevado	Crater 31	75.75	6.15	0.1797	55.4	9.84	0.1488	27.96	0.0022	99.692	0.46452	0.52538	0.0101008
	Recent Nevado	Crater 31	101.24	6.37	0.192	56.1	9.45	0.1488	27.93	0.0119	100.222	0.44563	0.54359	0.0107806
	Recent Nevado	Crater 31	144.2	5.97	0.1634	55.35	10.13	0.1484	28.51	0.0068	100.303	0.479458	0.511334	0.0092086
	Recent Nevado	Crater 31	93.32	6.93	0.2048	57.49	8.57	0.1466	26.89	0.005	100.296	0.401319	0.587262	0.0114193
	Recent Nevado	Crater 31	70.85	6.96	0.2393	57.14	8.39	0.1459	26.87	0.008	99.7639	0.394453	0.592151	0.0133961
	Recent Nevado	Crater 31	120.6	7.68	0.3052	59.11	7.1	0.1457	25.55	0	99.9013	0.332376	0.650612	0.0170121
	Recent Nevado	Crater 31	115.56	6.3	0.1965	55.81	9.59	0.1451	28.31	0.0166	100.403	0.451834	0.537143	0.0110236
	Recent Nevado	Crater 31	91.66	7.13	0.2513	58.09	8.23	0.1426	26.76	0.0103	100.652	0.384008	0.602031	0.0139615
	Recent Nevado	Crater 31	152.1	7.49	0.2629	59.31	7.36	0.1417	26.14	0.0143	100.725	0.346726	0.638527	0.0147469
	Recent Nevado	Crater 31	215.8	8.27	0.3311	60.77	6.23	0.1415	25.03	0.0025	100.787	0.288561	0.693178	0.0182604
	Recent Nevado	Crater 31	255.15	7.27	0.2702	58.4	7.71	0.1384	26.07	0.0009	99.8712	0.36389	0.620925	0.0151846
	Recent Nevado	Crater 31	43.96	7.04	0.2445	58.14	8.17	0.1383	26.63	0	100.404	0.385361	0.600907	0.0137317
	Recent Nevado	Crater 31	76.55	6.75	0.2292	57.31	8.8	0.1352	27.32	0	100.546	0.41338	0.5738	0.0128198
	Recent Nevado	Crater 31	277.96	6.24	0.1592	55.83	9.9	0.1348	28.07	0	100.373	0.463014	0.52812	0.0088655
	Recent Nevado	Crater 31	240.2	6.39	0.2212	56.49	9.33	0.1336	27.57	0.0048	100.152	0.440991	0.54656	0.012449
	Recent Nevado	Crater 31	136.99	8.12	0.3253	60.26	6.63	0.1328	25.4	0.0011	100.872	0.305368	0.676792	0.01784
	Recent Nevado	Crater 31	244.44	7.76	0.2815	59.41	6.95	0.1317	25.44	0.0147	99.9922	0.325864	0.65842	0.0157156
	Recent Nevado	Crater 31	187.16	8.16	0.3437	60.56	6.08	0.1311	24.89	0.0044	100.192	0.28604	0.694707	0.0192532
	Recent Nevado	Crater 31	49.6	7.7	0.2252	58.61	7.34	0.1307	25.44	0.0056	99.453	0.340725	0.646827	0.0124474
	Recent Nevado	Crater 31	122.5	6.21	0.1569	55.52	9.62	0.1307	27.32	0.0065	98.9722	0.457124	0.533998	0.00887734
	Recent Nevado	Crater 31	106.77	7.02	0.228	57.6	8.42	0.13	27.03	0.02	100.457	0.393549	0.593762	0.0126888
	Recent Nevado	Crater 31	146.8	6.32	0.1476	55.86	9.39	0.1298	27.27	0	99.1248	0.447088	0.544544	0.00836786
	Recent Nevado	Crater 31	90.7	6.82	0.2326	56.94	8.58	0.1292	27.03	0.0122	99.7516	0.404743	0.582192	0.0130648
	Recent Nevado	Crater 31	201.48	8.36	0.3471	61.11	6.01	0.1288	24.89	0	100.852	0.278863	0.70196	0.0191766
	Recent Nevado	Crater 31	162.56	6.9	0.2076	57.86	8.74	0.1288	26.86	0.0051	100.722	0.407011	0.581478	0.0115113
	Recent Nevado	Crater 31	208.72	6.34	0.1586	56	9.95	0.1285	27.88	0.0082	100.481	0.460395	0.530867	0.00873799
	Recent Nevado	Crater 31	158.3	7.11	0.2134	58.7	8.21	0.128	26.71	0.0201	101.13	0.384894	0.603194	0.0119122
	Recent Nevado	Crater 31	182.61	6.55	0.2272	57.39	8.97	0.1279	26.92	0.0085	100.212	0.425248	0.561927	0.012825
	Recent Nevado	Crater 31	61.5	7.03	0.2383	58.81	8.1	0.1273	26.52	0.0132	100.884	0.383788	0.602768	0.0134441
	Recent Nevado	Crater 31	273.08	7.72	0.2491	59.75	7.27	0.1269	25.88	0	101.012	0.33756	0.648668	0.0137718
	Recent Nevado	Crater 31	110.35	5.96	0.1382	54.93	10.15	0.1252	28.07	0	99.3928	0.481044	0.511157	0.0077988
	Recent Nevado	Crater 31	254.88	7.39	0.2261	58.24	8.15	0.1248	26.67	0	100.805	0.373984	0.613662	0.0123537
	Recent Nevado	Crater 31	146.2	7.07	0.219	58.44	8.36	0.1242	26.73	0.0142	100.968	0.390384	0.59744	0.0121767
	Recent Nevado	Crater 31	258.76	7.72	0.2994	59.53	6.89	0.1237	25.68	0.0216	100.295	0.324742	0.658455	0.0168024
	Recent Nevado	Crater 31	167.21	8.07	0.32	60.1	6.48	0.1211	25.26	0.0098	100.376	0.301891	0.680358	0.0177511
	Recent Nevado	Crater 31	225.25	6.35	0.2146	56.1	9.44	0.1202	27.7	0	99.937	0.445563	0.542376	0.0120606
	Recent Nevado	Crater 31	170.4	7.27	0.2343	58.9	7.85	0.12	26.3	0	100.716	0.368805	0.618088	0.0131069
	Recent Nevado	Crater 31	231.8	7.35	0.2308	58.28	8	0.1195	26.24	0.003	100.239	0.37079	0.616473	0.0127372
	Recent Nevado	Crater 31	37.3	7.12	0.2195	58.72	8.22	0.1188	26.66	0.0204	101.085	0.384725	0.603042	0.0122325
	Recent Nevado	Crater 31	180.4	6.61	0.212	56.4	9.35	0.1185	27.28	0	99.9828	0.433592	0.554702	0.0117059
	Recent Nevado	Crater 31	212.54	7.16	0.2328	57.91	8.23	0.1183	26.83	0.0146	100.5	0.38343	0.603655	0.0129143
	Recent Nevado	Crater 31	301.04	5.51	0.1326	54.36	11.21	0.1183	29.01	0	100.368	0.525331	0.46727	0.00739898
	Recent Nevado	Crater 31	105.65	7.56	0.2828	58.82	7.32	0.1178	25.88	0	100.001	0.343058	0.641161	0.0157811
	Recent Nevado	Crater 31	109.9	7.34	0.2449	59.06	7.74	0.1174	26.3	0.0049	100.847	0.363137	0.623182	0.013681
	Recent Nevado	Crater 31	73.6	7.08	0.2221	58.73	8.14	0.1171	26.72	0.0012	101.031	0.383662	0.603874	0.0124645
	Recent Nevado	Crater 31	97.8	7.28	0.2265	58.62	8.15	0.1171	26.76	0	101.183	0.377423	0.610087	0.0124894
	Recent Nevado	Crater 31	134.65	6.12	0.1431	55.77	9.72	0.1169	27.54	0	99.4103	0.463623	0.52825	0.00812717
	Recent Nevado	Crater 31	272.98	6.39	0.1859	56.06	9.48	0.1165	28.04	0.0183	100.34	0.445806	0.543785	0.0104092
	Recent Nevado	Crater 31	197.43	7.24	0.2474	58.29	8.06	0.116	26.58	0	100.548	0.375648	0.610623	0.0137292
	Recent Nevado	Crater 31	324.12	5.73	0.1524	54.95	10.78	0.1157	28.68	0	100.451	0.505377	0.486116	0.00850711
	Recent Nevado	Crater 31	98.2	5.88	0.1372	55.43	10.01	0.1147	28	0	99.5954	0.480927	0.511224	0.00784874
	Recent Nevado	Crater 31	195.35	6.3	0.204	55.95	9.74	0.114	27.8	0.0194	100.189	0.45549	0.533151	0.0113593
	Recent Nevado	Crater 31	49.4	7.04	0.237	58.85	7.94	0.1137	26.43	0.0147	100.65	0.378781	0.607757	0.0134622
	Recent Nevado	Crater 31	134.1	6.93	0.2168	57.98	8.54	0.1119	26.95	0.0049	100.742	0.400209	0.587694	0.0120973
	Recent Nevado	Crater 31	182.32	8.05	0.3218	60.41	6.56	0.1103	25.4	0.0175	100.899	0.304965	0.677222	0.0178128
	Recent Nevado	Crater 31	257.87	6.41	0.1956	56.01	9.52	0.1079	27.87	0.0048	100.141	0.445847	0.543246	0.0109073
	Recent Nevado	Crater 31	122	7.16	0.2178	58.64	8	0.1077	26.53	0	100.665	0.377069	0.610708	0.0122233
	Recent Nevado	Crater 31	150.5	7.57	0.2819	58.86	7.49	0.1055	25.95	0	100.268	0.347975	0.636431	0.0155942
	Recent Nevado	Crater 31	85.7	7.06	0.2018	58.44	8.19	0.1029	26.68	0	100.691	0.386207	0.602462	0.0113307
	Recent Nevado	Crater 31	227.65	6.5	0.2023	56.42	9.26	0.0925	27.71	0	100.212	0.435489	0.553183	0.0113283
	Recent Nevado	Crater 31	288.09	6.29	0.1794	55.96	9.41	0.0912	27.83	0	99.8147	0.447964	0.541867	0.010169
	Recent Nevado	Crater 31	165.45	6.92	0.2346	57.33	8.46	0.0903	26.93	0.0022	99.9738	0.397894	0.588968	0.0131379
	Recent Nevado	Crater 31	135.55	7.54	0.2762	59.11	7.26	0.0896	25.76	0.01	100.073	0.341913	0.642599	0.0154883
	Recent Nevado	Crater 31	242.76	6.53	0.2072	56.39	9.31	0.0877	27.72	0.0024	100.273	0.435584	0.552873	0.0115429
	Recent Nevado	Crater 31	73.8	8.05	0.2968	60.52	6.83	0.0635	25.38	0.0023	101.153	0.31401	0.669742	0.0162475
	Recent Nevado	Crater 31	42.6	8.1	0.3137	60.52	6.88	0.0575	25.54	0.0062	101.439	0.31399	0.668963	0.0170468
	Recent Nevado	Crater 31	63.4	8.08	0.3096	60.42	6.72	0.0484	25.39	0	100.971	0.309529	0.673492	0.0169798
	Recent Nevado	Crater 31	84.2	8.1	0.299	60.44	6.77	0.0469	25.47	0	101.149	0.310779	0.672878	0.0163431
	Recent Nevado	Crater 31	94.6	8.06	0.28	60.2	6.95	0.0447	25.52	0.009	101.073	0.317802	0.666953	0.0152451
	Recent Nevado	Crater U25	88.66	5.67	0.3868	55.78	10.16	0.3816	27.4	0.0242	99.8472	0.486563	0.49138	0.0220563
	Recent Nevado	Crater U25	1	6.06	0.4901	56.11	9.27	0.3792	27.01	0.0214	99.3902	0.445247	0.526724	0.028029
	Recent Nevado	Crater U25	98.4	5.74	0.3964	55.75	10.23	0.3778	27.44	0.0015	99.9609	0.485081	0.492538	0.0223807
	Recent Nevado	Crater U25	59.32	4.83	0.2963	53.89	11.6	0.374	28.65	0.0313	99.681	0.560568	0.422383	0.0170491
	Recent Nevado	Crater U25	1	6.48	0.5534	58.2	8.24	0.3658	26.19	0.0136	100.076	0.399509	0.568543	0.0319477
	Recent Nevado	Crater U25	39.88	6.41	0.5245	57.6	8.53	0.3554	26.14	0.0233	99.6271	0.411	0.558908	0.0300912
	Recent Nevado	Crater U25	12.06	6.19	0.5046	56.09	8.99	0.3392	26.95	0	99.0959	0.432369	0.538735	0.0288964
	Recent Nevado	Crater U25	1	5.92	0.4091	57.04	9.48	0.3374	27.04	0.0065	100.234	0.458412	0.518034	0.0235547
	Recent Nevado	Crater U25	69.04	4.69	0.2722	53.57	11.85	0.3364	28.7	0.0398	99.4662	0.573537	0.410776	0.0156867
	Recent Nevado	Crater U25	10.74	5.71	0.4596	55.78	10.02	0.336	27.29	0	99.637	0.479421	0.494396	0.0261836
	Recent Nevado	Crater U25	10.72	6.37	0.5221	57.74	8.7	0.3267	26.46	0.0197	100.173	0.417286	0.552896	0.0298174
	Recent Nevado	Crater U25	45.24	6.37	0.4308	56.3	8.73	0.3262	26.68	0.0329	98.8979	0.420312	0.554991	0.0246964
	Recent Nevado	Crater U25	108.14	6.69	0.5418	58.35	8.18	0.3251	25.83	0.0255	99.9496	0.390798	0.578382	0.0308204
	Recent Nevado	Crater U25	19.36	6.37	0.5554	57.7	8.68	0.3249	26.59	0.0111	100.249	0.415935	0.552376	0.0316893
	Recent Nevado	Crater U25	78.76	6.37	0.5249	57.12	8.79	0.3249	25.89	0.0083	99.0706	0.419724	0.550432	0.0298437
	Recent Nevado	Crater U25	31.73	5.78	2.01	60.64	7.28	0.3243	25.08	0	101.18	0.361596	0.519529	0.118875
	Recent Nevado	Crater U25	49.6	5.37	0.3523	55.21	10.43	0.3231	27.7	0.0263	99.4637	0.507119	0.472486	0.0203957
	Recent Nevado	Crater U25	37.72	6.27	0.4812	57.39	8.91	0.3208	26.67	0.0123	100.095	0.427762	0.54473	0.0275075
	Recent Nevado	Crater U25	23.12	6.18	0.4787	56.27	8.89	0.3195	26.82	0.0039	98.9838	0.430644	0.541745	0.0276109
	Recent Nevado	Crater U25	26.86	5.43	0.333	54.9	10.69	0.3189	28.33	0.0192	100.025	0.511171	0.46987	0.0189598
	Recent Nevado	Crater U25	20.44	6.26	0.4911	57.08	9.15	0.3157	26.66	0.0426	100.001	0.434411	0.537827	0.027762
	Recent Nevado	Crater U25	1	6.07	0.4817	56.73	9.18	0.3122	27.11	0.0149	99.8989	0.442666	0.529677	0.0276574
	Recent Nevado	Crater U25	31.66	6.12	0.495	57.55	9.1	0.3106	26.89	0.0252	100.531	0.438252	0.533363	0.028385
	Recent Nevado	Crater U25	1	6.54	0.4636	57.67	8.41	0.3095	25.96	0.0067	99.3773	0.404386	0.569072	0.0265426
	Recent Nevado	Crater U25	1	6.26	0.5079	57.51	9.05	0.3085	26.56	0.0014	100.217	0.431301	0.539878	0.0288211
	Recent Nevado	Crater U25	20.93	6.04	0.4836	57.42	9.09	0.3041	26.81	0	100.157	0.441348	0.530694	0.0279579
	Recent Nevado	Crater U25	74.44	5.68	0.3282	55.88	10.2	0.3027	27.69	0.0227	100.14	0.488752	0.492523	0.0187253
	Recent Nevado	Crater U25	69.18	6.27	0.5051	56.94	9.18	0.3024	26.59	0.0242	99.828	0.434499	0.537035	0.0284659
	Recent Nevado	Crater U25	78.92	6.14	0.4873	56.67	9.31	0.296	26.68	0.0221	99.6273	0.443305	0.529067	0.0276281
	Recent Nevado	Crater U25	30.16	6.18	0.4694	56.85	9.41	0.2953	27.17	0.001	100.4	0.444867	0.52871	0.0264231
	Recent Nevado	Crater U25	41.88	5.44	0.3868	55.73	10.31	0.2933	27.94	0.0205	100.165	0.500123	0.477536	0.0223411
	Recent Nevado	Crater U25	13.93	6.88	0.6492	58.82	7.42	0.2918	25.56	0.0041	99.6715	0.35944	0.603115	0.0374457
	Recent Nevado	Crater U25	21.44	6.56	0.5917	58.33	8.29	0.2894	26.26	0.0016	100.353	0.397303	0.568932	0.0337652
	Recent Nevado	Crater U25	11.22	6.9	0.6766	58.93	7.64	0.2893	25.53	0.0021	100.004	0.36499	0.596522	0.0384876
	Recent Nevado	Crater U25	16.56	5.43	0.3922	55.27	10.46	0.2886	27.95	0.0115	99.8046	0.504017	0.473481	0.022502
	Recent Nevado	Crater U25	52.1	5.3	0.3216	55.15	10.77	0.2785	28.33	0.011	100.196	0.519187	0.462353	0.0184597
	Recent Nevado	Crater U25	1	6.16	0.5107	57.22	8.92	0.275	26.51	0.0182	99.6351	0.431431	0.539158	0.0294112
	Recent Nevado	Crater U25	56.08	6.08	0.3949	56.92	9.45	0.2748	27.11	0.0093	100.27	0.451662	0.525865	0.0224734
	Recent Nevado	Crater U25	1	6.11	0.4737	57.18	9.3	0.2745	27.03	0.0046	100.388	0.444532	0.528507	0.0269603
	Recent Nevado	Crater U25	88.48	6.11	0.4465	56.66	9.43	0.2741	26.76	0	99.6917	0.448653	0.526053	0.0252942
	Recent Nevado	Crater U25	34.18	5.85	0.4003	55.44	9.58	0.267	27.43	0.0304	98.9978	0.464081	0.51283	0.0230895
	Recent Nevado	Crater U25	59.44	6.62	0.5875	57.88	8.59	0.2529	26.08	0.0095	100.044	0.403869	0.563241	0.0328894
	Recent Nevado	Crater U25	37.85	5.88	0.3576	55.73	10.16	0.2425	27.54	0.0162	99.9711	0.478649	0.501291	0.0200596
	Recent Nevado	Crater U25	30.22	6.94	0.7153	58.81	7.56	0.2398	25.31	0	99.5908	0.360506	0.59888	0.0406144
	Recent Nevado	Crater U25	20.48	7.12	0.7603	59.05	7.29	0.2325	25.18	0.0113	99.677	0.345828	0.611226	0.0429456
	Recent Nevado	Crater U25	30.48	5.56	0.3602	55.45	10.28	0.2241	27.8	0.0212	99.6956	0.494935	0.484416	0.020649
	Recent Nevado	Crater U25	92.8	6.56	0.4123	58.23	8.6	0.2229	26.56	0.0194	100.628	0.410265	0.566316	0.0234196
	Recent Nevado	Crater U25	1	5.6	0.4172	55.64	10.22	0.2226	27.87	0.0011	100.022	0.490152	0.486023	0.0238246
	Recent Nevado	Crater U25	49.7	6.73	0.6472	58.31	8.15	0.222	25.91	0	99.972	0.386267	0.57721	0.0365232
	Recent Nevado	Crater U25	39.96	6.88	0.6883	58.83	7.93	0.217	25.46	0	100.041	0.37406	0.587281	0.0386587
	Recent Nevado	Crater U25	62.32	5.63	0.3218	55.74	10.4	0.2117	28.05	0.0111	100.37	0.495914	0.485815	0.0182709
	Recent Nevado	Crater U25	23.11	5.1	0.3231	54.47	11.23	0.2045	28.8	0	100.134	0.538769	0.442774	0.018457
	Recent Nevado	Crater U25	52.59	6.71	0.4937	58.23	8.24	0.2001	26.13	0.002	100.034	0.392934	0.579034	0.0280321
	Recent Nevado	Crater U25	45.22	6.72	0.5011	57.9	8.5	0.1995	26.61	0	100.459	0.399862	0.57207	0.0280683
	Recent Nevado	Crater U25	72.54	6.55	0.4673	58.67	8.19	0.1991	26.13	0.0027	100.279	0.397583	0.575406	0.027011
	Recent Nevado	Crater U25	59.96	6.73	0.4786	58.3	8.27	0.1885	26.29	0.0152	100.289	0.39346	0.579428	0.0271124
	Recent Nevado	Crater U25	67.33	6.85	0.4915	58.47	8.16	0.1778	26.12	0.006	100.292	0.385977	0.586342	0.0276819
	Recent Nevado	Crater U25	82.07	6.75	0.4594	58.57	8.33	0.1769	26.41	0.009	100.708	0.394937	0.579129	0.0259343
	Recent Nevado	Crater U25	8.37	5.57	0.4014	55.13	10.49	0.1736	28.05	0	99.8335	0.498395	0.478897	0.0227079
	Recent Nevado	Crater U25	74.7	6.76	0.4761	58.5	8.2	0.1703	26.09	0	100.234	0.390477	0.582528	0.0269948
	Recent Nevado	Crater U25	15.74	5.22	0.3622	54.8	10.89	0.162	28.67	0	100.158	0.524376	0.454857	0.0207666
	Recent Nevado	Crater U25	441.64	7.16	0.5378	59.37	7.39	0.1383	25.35	0.0117	99.9901	0.352118	0.61737	0.0305116
	Recent Nevado	Crater U25	65.65	7.22	0.4665	59.35	7.32	0.1379	25.53	0.0044	100.031	0.349554	0.623921	0.026525
	Recent Nevado	Crater U25	400.49	7.98	0.4133	61.96	5.99	0.1375	24.43	0.003	100.935	0.286289	0.690191	0.0235203
	Recent Nevado	Crater U25	104.44	7.74	0.4516	60.7	6.23	0.1368	24.6	0	99.8919	0.299891	0.674225	0.0258839
	Recent Nevado	Crater U25	130.3	6.91	0.3099	58.5	7.93	0.1361	26.2	0	99.9909	0.381185	0.601077	0.0177372
	Recent Nevado	Crater U25	62.46	7.33	0.6602	60.63	6.74	0.1348	24.92	0.0102	100.432	0.324184	0.638006	0.0378101
	Recent Nevado	Crater U25	78.58	7.07	0.4077	58.78	7.69	0.1334	25.79	0.0051	99.9049	0.366723	0.610127	0.0231501
	Recent Nevado	Crater U25	515.08	7.55	0.5354	60.21	6.78	0.1326	24.94	0.0028	100.182	0.321629	0.648129	0.0302416
	Recent Nevado	Crater U25	308.3	8.15	0.4142	62.17	5.66	0.1319	24.04	0	100.585	0.270792	0.705612	0.0235956
	Recent Nevado	Crater U25	368.2	6.65	0.486	58.49	8.3	0.1317	26.26	0.013	100.36	0.396888	0.575441	0.0276711
	Recent Nevado	Crater U25	39.79	6.77	0.4927	58.46	7.94	0.1308	26.16	0	99.9748	0.382138	0.589627	0.0282347
	Recent Nevado	Crater U25	313.12	6.69	0.4317	58.23	8.28	0.129	26.45	0.0148	100.251	0.396164	0.579242	0.0245939
	Recent Nevado	Crater U25	423.28	6.72	0.4515	58.45	8.29	0.1284	26.17	0.0035	100.253	0.394982	0.579404	0.0256142
	Recent Nevado	Crater U25	143.23	6.96	0.3031	58.17	8.02	0.1281	26.29	0	99.8898	0.382343	0.600451	0.0172055
	Recent Nevado	Crater U25	369.76	7.97	0.3903	61.79	6	0.128	24.39	0.0042	100.686	0.287254	0.690497	0.0222492
	Recent Nevado	Crater U25	32.12	7.74	0.9931	61.31	5.48	0.1279	23.82	0	99.4711	0.265131	0.677658	0.0572103
	Recent Nevado	Crater U25	339.03	7.93	0.384	61.43	6.14	0.127	24.31	0.0021	100.34	0.293113	0.68506	0.0218272
	Recent Nevado	Crater U25	277.57	7.03	0.2885	59.42	7.83	0.1267	25.87	0	100.595	0.374727	0.608833	0.0164399
	Recent Nevado	Crater U25	185.38	7.01	0.2719	58.98	8.07	0.1253	26.22	0	100.703	0.382841	0.6018	0.0153587
	Recent Nevado	Crater U25	169.09	6.52	0.2574	57.17	9.03	0.1237	26.89	0	100.01	0.427248	0.558251	0.0145011
	Recent Nevado	Crater U25	386.56	6.87	0.505	58.59	8.06	0.1234	26.07	0	100.235	0.382109	0.589384	0.0285066
	Recent Nevado	Crater U25	246.84	7.35	0.3114	60.14	7.23	0.1223	25.65	0	100.843	0.345907	0.636353	0.0177395
	Recent Nevado	Crater U25	52.72	7.15	0.5129	58.97	7.53	0.1221	25.69	0.0222	99.9992	0.357218	0.61381	0.0289716
	Recent Nevado	Crater U25	182.02	6.53	0.2376	56.95	9.33	0.1219	26.71	0.0061	99.9223	0.435375	0.551423	0.0132017
	Recent Nevado	Crater U25	220.81	6.43	0.2782	57.45	8.8	0.121	26.38	0	99.4841	0.423746	0.560303	0.0159507
	Recent Nevado	Crater U25	78.42	7.33	0.4813	58.55	6.93	0.1195	25.13	0	98.5408	0.333692	0.638713	0.0275949
	Recent Nevado	Crater U25	156.16	6.94	0.2902	58.32	8.13	0.118	26.04	0	99.8608	0.386511	0.597062	0.0164274
	Recent Nevado	Crater U25	492.68	6.99	0.2855	58.78	8.2	0.1177	26.5	0.006	100.879	0.386989	0.596968	0.0160432
	Recent Nevado	Crater U25	67.36	7.08	0.4675	57.87	7.42	0.1177	25.84	0.0003	98.8407	0.356923	0.616301	0.0267764
	Recent Nevado	Crater U25	156.6	7.41	0.6232	60.77	6.81	0.1171	25.05	0.0073	100.797	0.324883	0.639716	0.0354004
	Recent Nevado	Crater U25	40.86	6.69	0.5938	58.89	7.97	0.1168	26.17	0.0075	100.451	0.383478	0.582503	0.0340192
	Recent Nevado	Crater U25	91.51	7.08	0.3769	58.92	7.7	0.1165	25.9	0	100.103	0.36735	0.61124	0.02141
	Recent Nevado	Crater U25	63.24	7.78	0.943	61.29	5.54	0.1163	23.68	0	99.3703	0.267094	0.678772	0.0541337
	Recent Nevado	Crater U25	129.52	8.06	0.6339	61.95	5.81	0.1163	23.92	0	100.495	0.2747	0.689614	0.0356865
	Recent Nevado	Crater U25	294.76	6.78	0.4684	58.66	7.86	0.1163	26.06	0	99.9542	0.379949	0.593091	0.02696
	Recent Nevado	Crater U25	147.88	7.98	0.6236	61.62	5.87	0.116	24.22	0.0027	100.463	0.278816	0.685916	0.0352684
	Recent Nevado	Crater U25	584.87	7.92	0.4227	61.27	6.21	0.1154	24.38	0	100.319	0.295074	0.681011	0.0239151
	Recent Nevado	Crater U25	94.36	7.71	0.7742	60.52	6.19	0.1154	24.26	0	99.5697	0.293865	0.662371	0.0437635
	Recent Nevado	Crater U25	276.4	7.05	0.4948	59.2	7.63	0.1154	25.67	0.0015	100.189	0.363731	0.608183	0.0280858
	Recent Nevado	Crater U25	460	7.21	0.539	59.75	7.19	0.1154	25.36	0.0109	100.182	0.344362	0.6249	0.030738
	Recent Nevado	Crater U25	281.08	7.52	0.6192	60.96	6.56	0.1151	24.87	0	100.653	0.31379	0.650943	0.0352669
	Recent Nevado	Crater U25	202.96	8.02	0.6245	61.62	5.85	0.1115	24.08	0	100.331	0.277162	0.687608	0.0352299
	Recent Nevado	Crater U25	523.41	7.13	0.3161	59.22	7.83	0.1104	25.81	0	100.469	0.370931	0.611238	0.0178302
	Recent Nevado	Crater U25	233.74	6.37	0.2682	57.04	9.09	0.1103	26.25	0	99.1601	0.434166	0.550581	0.0152529
	Recent Nevado	Crater U25	554.14	7.84	0.4193	61.34	6.17	0.1102	24.33	0.0142	100.251	0.295828	0.680235	0.0239375
	Recent Nevado	Crater U25	125.48	7.6	0.6921	61.19	6.37	0.11	24.61	0	100.644	0.304097	0.656562	0.0393408
	Recent Nevado	Crater U25	246.67	6.22	0.25	56.76	9.38	0.1097	27.05	0	99.8199	0.448084	0.537696	0.0142199
	Recent Nevado	Crater U25	92.98	6.83	0.4629	59.06	7.79	0.1094	26.1	0	100.361	0.376312	0.597063	0.0266255
	Recent Nevado	Crater U25	180.37	6.66	0.3604	58.38	8.22	0.1091	26.2	0	99.9296	0.397078	0.582193	0.0207295
	Recent Nevado	Crater U25	100.65	6.64	0.4037	58.63	8.2	0.109	26.29	0.0026	100.283	0.3962	0.580575	0.0232253
	Recent Nevado	Crater U25	216.11	6.07	0.2073	57.22	9.55	0.1089	27.69	0	100.863	0.459548	0.528574	0.0118776
	Recent Nevado	Crater U25	194.95	6.47	0.2527	56.94	9.25	0.107	26.86	0	99.8953	0.435106	0.55074	0.0141534
	Recent Nevado	Crater U25	80.72	6.66	0.4546	59.1	7.98	0.1059	26.18	0	100.495	0.387879	0.585811	0.0263102
	Recent Nevado	Crater U25	109.92	7.51	0.7248	61.05	6.42	0.1059	24.61	0.0011	100.438	0.30757	0.651085	0.0413454
	Recent Nevado	Crater U25	113.42	7.13	0.5146	59.79	7.39	0.1055	25.51	0.0032	100.463	0.353498	0.617193	0.0293098
	Recent Nevado	Crater U25	123.64	7.02	0.4702	59.3	7.71	0.105	25.78	0	100.422	0.367608	0.605698	0.026694
	Recent Nevado	Crater U25	111.16	7.96	0.6236	61.46	5.77	0.105	24.1	0	100.038	0.27585	0.688652	0.035498
	Recent Nevado	Crater U25	331.48	6.44	0.4184	57.44	8.79	0.1049	26.92	0	100.128	0.419727	0.556484	0.0237887
	Recent Nevado	Crater U25	207.88	6.22	0.2395	56.63	9.57	0.1049	26.96	0	99.7667	0.453317	0.533175	0.0135082
	Recent Nevado	Crater U25	221.32	7.86	0.644	61.52	6.01	0.1035	24.24	0.0101	100.437	0.286184	0.677302	0.0365138
	Recent Nevado	Crater U25	93.19	6.66	0.3969	58.78	8.31	0.1026	26.26	0	100.537	0.398854	0.578464	0.0226827
	Recent Nevado	Crater U25	296.64	7.66	0.66	61.42	6.12	0.1026	24.27	0	100.246	0.29469	0.66747	0.0378406
	Recent Nevado	Crater U25	78.8	7.78	0.8402	60.74	5.76	0.1025	24.13	0.0024	99.3597	0.276401	0.675593	0.0480065
	Recent Nevado	Crater U25	123.92	6.71	0.3229	58.87	8.17	0.1017	26.08	0	100.28	0.394742	0.586682	0.0185763
	Recent Nevado	Crater U25	120.58	6.96	0.4406	59.73	7.38	0.1017	25.72	0	100.354	0.360007	0.614402	0.0255917
	Recent Nevado	Crater U25	249.96	7.67	0.6896	61.64	5.96	0.1017	24.05	0	100.115	0.288467	0.671791	0.0397418
	Recent Nevado	Crater U25	184.6	8.02	0.6084	61.68	5.89	0.1002	24.18	0	100.507	0.278782	0.68693	0.0342878
	Recent Nevado	Crater U25	203.28	7.38	0.6266	60.47	6.79	0.0999	25.13	0	100.518	0.325018	0.639269	0.0357132
	Recent Nevado	Crater U25	404.92	5.83	0.3653	56.42	9.87	0.0993	27.45	0	100.056	0.473266	0.505878	0.0208564
	Recent Nevado	Crater U25	533.44	7.26	0.4943	59.49	7.24	0.0975	25.35	0.0116	99.9768	0.345313	0.626615	0.0280716
	Recent Nevado	Crater U25	496.72	7.38	0.5019	59.71	7.02	0.0967	25.15	0.0033	99.8918	0.334721	0.636784	0.0284947
	Recent Nevado	Crater U25	349.84	6.96	0.5129	58.69	7.87	0.0952	26.1	0.0019	100.269	0.373416	0.597608	0.0289769
	Recent Nevado	Crater U25	478.36	7.24	0.4962	59.49	7.28	0.0942	25.42	0	100.052	0.347121	0.624708	0.0281713
	Recent Nevado	Crater U25	160.44	6.83	0.3822	58.91	7.76	0.0934	25.8	0	99.7884	0.37716	0.600722	0.0221185
	Recent Nevado	Crater U25	133.86	6.89	0.4475	59.37	7.87	0.0919	25.92	0.0012	100.603	0.377075	0.597395	0.0255298
	Recent Nevado	Crater U25	117.37	7.43	0.3763	59.51	7.09	0.0918	25.51	0	100.019	0.337883	0.640764	0.0213528
	Recent Nevado	Crater U25	166.24	7.85	0.6088	61.59	5.89	0.0908	24.28	0	100.347	0.282895	0.682289	0.0348165
	Recent Nevado	Crater U25	187.72	7.32	0.5911	60.26	6.99	0.0904	25.15	0.0127	100.42	0.333806	0.632583	0.0336108
	Recent Nevado	Crater U25	141.04	7.41	0.6772	60.94	6.6	0.0886	24.76	0.0034	100.516	0.317069	0.644194	0.0387371
	Recent Nevado	Crater U25	47.68	7.68	0.9669	61.27	5.6	0.0884	23.72	0.0023	99.3366	0.271197	0.673049	0.0557543
	Recent Nevado	Crater U25	154.65	7.06	0.3145	60.01	7.46	0.0878	25.5	0	100.45	0.361952	0.619878	0.0181691
	Recent Nevado	Crater U25	60.79	5.97	0.3866	57.1	9.34	0.0874	27.29	0	100.174	0.453314	0.524344	0.0223417
	Recent Nevado	Crater U25	144.08	7.2	0.5347	59.84	7.13	0.0859	25.38	0.0148	100.185	0.342855	0.626531	0.0306148
	Recent Nevado	Crater U25	234.4	7.61	0.657	61.12	6.31	0.0851	24.68	0.0284	100.52	0.302441	0.660063	0.0374954
	Recent Nevado	Crater U25	258.04	7.38	0.5341	60	7.07	0.0847	25.16	0.0116	100.25	0.335692	0.634113	0.0301957
	Recent Nevado	Crater U25	133.72	7.37	0.4096	57.99	7.05	0.0836	25.64	0.012	98.5668	0.33773	0.638906	0.0233637
	Recent Nevado	Crater U25	103.2	6.67	0.4138	58.24	8.6	0.0832	26.58	0.0002	100.587	0.406371	0.570347	0.0232818
	Recent Nevado	Crater U25	82.76	7.33	0.5538	60.34	6.95	0.0824	25.28	0.0038	100.54	0.33295	0.63546	0.0315899
	Recent Nevado	Crater U25	172.16	7.3	0.6233	60.43	6.85	0.0812	25.23	0	100.522	0.329288	0.635035	0.0356766
	Recent Nevado	Crater U25	218.84	7.12	0.5663	59.87	7.32	0.0811	25.48	0.0009	100.453	0.350594	0.61711	0.0322954
	Recent Nevado	Crater U25	239.68	7.48	0.5513	60.26	6.78	0.0803	25.05	0.013	100.238	0.323281	0.645419	0.0312997
	Recent Nevado	Crater U25	265.52	7.7	0.6808	61.17	6.16	0.074	24.49	0.0069	100.308	0.29467	0.666553	0.0387771
	Recent Nevado	Crater U25	140.51	6.84	0.3806	58.73	7.95	0.0657	25.81	0	99.7763	0.38256	0.595632	0.0218073
	Recent Nevado	Crater U25	200.08	7.31	0.3855	58.41	7.1	0.0616	25.42	0.0125	98.7353	0.341553	0.636365	0.0220813
	Recent Nevado	Crater U25	211.14	7.23	0.3848	59.5	7.33	0.0595	25.48	0.0147	100.023	0.351192	0.626856	0.0219521
	Recent Nevado	Crater U30	1	6.26	0.502	56.71	9.03	0.3898	26.55	0	99.4956	0.430903	0.540574	0.0285231
	Recent Nevado	Crater U30	1	6.11	0.44	56.75	9.5	0.3795	27	0.0079	100.214	0.450649	0.524499	0.0248524
	Recent Nevado	Crater U30	1	6.13	0.5222	56.76	9.37	0.3481	26.22	0.0071	99.3949	0.444396	0.526114	0.0294896
	Recent Nevado	Crater U30	22.42	5.17	0.346	54.41	10.87	0.3428	28.09	0.0135	99.2554	0.526705	0.453333	0.0199625
	Recent Nevado	Crater U30	1	5.53	0.4263	55.34	10.55	0.32	27.56	0.0056	99.7583	0.500835	0.475069	0.0240967
	Recent Nevado	Crater U30	1	6.51	0.6651	58.25	8.09	0.3156	25.56	0.0104	99.4156	0.391529	0.570145	0.0383268
	Recent Nevado	Crater U30	1	5.83	0.482	55.97	9.64	0.3114	27.23	0.0186	99.5295	0.464264	0.508096	0.0276399
	Recent Nevado	Crater U30	15.54	5.26	0.4066	54.85	10.93	0.3054	27.81	0.0002	99.5885	0.522148	0.454724	0.0231282
	Recent Nevado	Crater U30	15.11	6.13	0.5379	56.93	9.24	0.297	27.03	0.0162	100.213	0.440556	0.528907	0.0305374
	Recent Nevado	Crater U30	426.6	5.24	0.2715	54.55	11.08	0.2951	27.9	0.0105	99.382	0.530506	0.454016	0.0154782
	Recent Nevado	Crater U30	213.8	6.05	0.2407	56.05	9.89	0.2941	26.66	0.0155	99.2093	0.468169	0.518264	0.013567
	Recent Nevado	Crater U30	273.17	4.94	0.2626	53.88	11.55	0.2903	28.72	0.0085	99.6825	0.555229	0.42974	0.0150309
	Recent Nevado	Crater U30	146.7	6.5	0.4516	57.44	8.43	0.2842	26.22	0.001	99.388	0.406651	0.56741	0.0259388
	Recent Nevado	Crater U30	1	6.57	0.6439	58.33	8.14	0.2826	26	0.0026	100.023	0.391423	0.57171	0.0368672
	Recent Nevado	Crater U30	400	4.9	0.2075	53.81	11.75	0.2794	28.17	0.0256	99.1737	0.563164	0.424994	0.0118418
	Recent Nevado	Crater U30	506.4	5.08	0.3231	53.91	11.47	0.274	28.26	0.0041	99.3411	0.544955	0.436767	0.0182783
	Recent Nevado	Crater U30	241.15	5.82	0.4329	56.28	9.75	0.2716	27.19	0.0107	99.799	0.468807	0.506409	0.0247844
	Recent Nevado	Crater U30	161.27	6.52	0.4755	57.99	8.04	0.2708	25.94	0.0273	99.298	0.394022	0.578231	0.027747
	Recent Nevado	Crater U30	80.8	5.91	0.351	56.09	9.75	0.2708	26.52	0.012	98.9151	0.467338	0.512629	0.0200325
	Recent Nevado	Crater U30	73.85	5.97	0.4212	56.62	9.26	0.2695	27.03	0.0102	99.6022	0.45028	0.525333	0.0243871
	Recent Nevado	Crater U30	17.01	6.35	0.6107	57.71	8.62	0.2686	26.25	0	99.8369	0.413662	0.551443	0.0348953
	Recent Nevado	Crater U30	134	6.16	0.2802	56.54	9.46	0.2665	26.53	0.0236	99.2922	0.451747	0.532321	0.0159321
	Recent Nevado	Crater U30	479.8	5.78	0.3483	55.96	10.2	0.266	27.28	0.0244	99.8892	0.484	0.496321	0.0196789
	Recent Nevado	Crater U30	267	5.79	0.2261	55.7	10.32	0.2657	26.93	0.0105	99.2628	0.489867	0.497354	0.0127791
	Recent Nevado	Crater U30	113.07	5.84	0.35	55.72	10.08	0.265	27.23	0.0221	99.5303	0.47852	0.501697	0.0197837
	Recent Nevado	Crater U30	257.16	5.22	0.3472	54.69	10.98	0.2647	28.18	0.0171	99.7065	0.52688	0.453283	0.0198376
	Recent Nevado	Crater U30	107.4	5.97	0.2775	55.75	10.11	0.2638	26.85	0.004	99.2505	0.475901	0.508545	0.0155536
	Recent Nevado	Crater U30	27.6	6.27	0.5134	57.18	8.98	0.2621	26.07	0.0161	99.312	0.428892	0.541912	0.0291963
	Recent Nevado	Crater U30	346.8	6.13	0.2738	56.63	9.43	0.2606	26.51	0.0311	99.2878	0.452299	0.532064	0.0156368
	Recent Nevado	Crater U30	320.2	5.62	0.2413	55.18	10.62	0.2604	27.5	0	99.4466	0.503857	0.482512	0.0136314
	Recent Nevado	Crater U30	453.2	5.33	0.2721	54.7	10.91	0.2582	27.77	0.0181	99.2717	0.522527	0.461956	0.0155172
	Recent Nevado	Crater U30	59.28	6.14	0.4973	56.95	8.88	0.2579	26.71	0.016	99.4908	0.431419	0.539813	0.0287677
	Recent Nevado	Crater U30	293.6	5.97	0.2438	55.96	9.9	0.2558	26.73	0.0096	99.1111	0.471569	0.514604	0.0138275
	Recent Nevado	Crater U30	30.08	5.54	0.4233	55.39	10.45	0.2496	27.4	0.0206	99.5041	0.498109	0.477867	0.0240246
	Recent Nevado	Crater U30	177.11	6.1	0.5373	56.79	9.27	0.2495	26.76	0.0168	99.7605	0.442514	0.526946	0.0305397
	Recent Nevado	Crater U30	88.42	6.41	0.4983	57.48	8.39	0.2492	26.38	0.0219	99.4523	0.407617	0.563557	0.0288259
	Recent Nevado	Crater U30	160.6	5.95	0.2557	56.23	9.76	0.2471	26.78	0.0201	99.2751	0.468516	0.516869	0.0146152
	Recent Nevado	Crater U30	240.4	5.56	0.2084	55.18	10.64	0.2471	27.36	0.0139	99.2375	0.507884	0.480271	0.0118446
	Recent Nevado	Crater U30	187.2	5.71	0.2171	55.39	10.61	0.247	27.15	0.0161	99.3618	0.500437	0.487371	0.0121926
	Recent Nevado	Crater U30	102.99	5.81	0.358	55.96	9.67	0.2441	27.33	0	99.4026	0.469185	0.510133	0.0206824
	Recent Nevado	Crater U30	33.02	5.98	0.4886	56.51	9.5	0.2436	26.77	0.0076	99.5231	0.454473	0.517696	0.0278316
	Recent Nevado	Crater U30	97.06	6.17	0.4235	56.92	9.2	0.2433	26.71	0.0228	99.7369	0.440831	0.535006	0.0241623
	Recent Nevado	Crater U30	1	6.49	0.6124	56.82	8.33	0.2392	26.68	0.0003	99.2112	0.40041	0.564539	0.0350507
	Recent Nevado	Crater U30	81.05	5.73	0.3814	56.19	9.67	0.2358	27.14	0.0136	99.4029	0.471862	0.505978	0.02216
	Recent Nevado	Crater U30	1	6.01	0.549	56.6	8.98	0.234	27.06	0.0133	99.4669	0.437845	0.530283	0.0318726
	Recent Nevado	Crater U30	44.71	5.95	0.5013	56.72	9.19	0.2338	27.1	0	99.7045	0.447111	0.523849	0.0290401
	Recent Nevado	Crater U30	269.09	6.16	0.2735	57.1	9.31	0.2331	26.63	0	99.7179	0.447963	0.536368	0.0156693
	Recent Nevado	Crater U30	29.22	6.77	0.6352	58.52	7.88	0.232	25.57	0	99.6159	0.377259	0.586531	0.0362097
	Recent Nevado	Crater U30	113.88	5.45	0.2369	55.32	10.52	0.232	28.1	0.017	99.887	0.509084	0.477265	0.0136502
	Recent Nevado	Crater U30	161.1	6.32	0.6063	57.45	8.67	0.2319	26.26	0.0061	99.5748	0.416251	0.549089	0.0346597
	Recent Nevado	Crater U30	1	6.36	0.5766	57.17	8.78	0.2272	26.55	0	99.6889	0.418578	0.548691	0.0327308
	Recent Nevado	Crater U30	373.4	5.63	0.227	55.18	10.56	0.2266	27.37	0.0368	99.248	0.502415	0.484726	0.0128595
	Recent Nevado	Crater U30	209.13	6.44	0.578	57.67	8.54	0.2263	26.23	0.0231	99.7253	0.40896	0.558082	0.0329573
	Recent Nevado	Crater U30	117.56	5.48	0.3297	55.51	10.12	0.2245	27.79	0.0176	99.5054	0.495366	0.485418	0.0192161
	Recent Nevado	Crater U30	129.08	5.75	0.3384	55.84	9.88	0.2239	27.22	0.0126	99.286	0.477565	0.502959	0.0194763
	Recent Nevado	Crater U30	117.32	5.13	0.3146	54.25	11.47	0.2235	28.37	0.0192	99.8093	0.542882	0.439388	0.0177297
	Recent Nevado	Crater U30	131.86	4.9	0.2963	53.85	11.73	0.2231	28.93	0.0069	99.9651	0.559905	0.423255	0.0168403
	Recent Nevado	Crater U30	35.06	5.07	0.3014	54.3	11.06	0.2231	28.8	0	99.7876	0.537058	0.445516	0.0174265
	Recent Nevado	Crater U30	132.13	6.23	0.4279	56.82	8.76	0.223	26.65	0	99.1537	0.426413	0.548786	0.024801
	Recent Nevado	Crater U30	15.57	6.48	0.6254	57.5	8.47	0.2227	26.39	0	99.6973	0.404469	0.559971	0.0355599
	Recent Nevado	Crater U30	226.76	6.21	0.2669	56.71	9.32	0.2212	26.87	0.005	99.6033	0.446455	0.538322	0.0152234
	Recent Nevado	Crater U30	240.87	6.02	0.2684	56.81	9.4	0.2212	26.81	0.024	99.5813	0.456011	0.528486	0.0155035
	Recent Nevado	Crater U30	65.04	6.05	0.4695	57.14	9.08	0.2203	26.47	0	99.4406	0.441049	0.531797	0.0271542
	Recent Nevado	Crater U30	225.14	6.07	0.5117	57.02	9.16	0.2198	26.61	0.0265	99.6575	0.441367	0.529276	0.0293576
	Recent Nevado	Crater U30	184.43	5.52	0.2214	55.42	10.24	0.2181	27.24	0.0033	98.8805	0.499689	0.487447	0.0128641
	Recent Nevado	Crater U30	16.21	6.54	0.6266	57.69	8.32	0.2138	25.99	0.0045	99.4027	0.398066	0.566238	0.0356963
	Recent Nevado	Crater U30	1	6.27	0.5826	57.19	8.76	0.2134	26.69	0.0045	99.7189	0.421153	0.545497	0.0333508
	Recent Nevado	Crater U30	212.65	5.86	0.2336	56.46	9.78	0.2132	27.09	0	99.6567	0.47332	0.513219	0.0134614
	Recent Nevado	Crater U30	30.14	6.49	0.6126	57.87	8.41	0.2129	26.39	0.0125	99.9999	0.402702	0.56237	0.0349274
	Recent Nevado	Crater U30	73.7	5.62	0.4087	55.64	10.24	0.2127	27.51	0.0112	99.6903	0.490028	0.486684	0.0232877
	Recent Nevado	Crater U30	145.09	5.99	0.3338	56.18	9.62	0.2117	26.96	0	99.3118	0.461233	0.519711	0.019056
	Recent Nevado	Crater U30	193.12	7.06	0.7771	59.35	7.33	0.2094	25.03	0.0049	99.7761	0.348529	0.607475	0.0439959
	Recent Nevado	Crater U30	49.03	6.92	0.6588	58.95	7.37	0.2087	25.17	0.0034	99.2981	0.356434	0.605629	0.0379372
	Recent Nevado	Crater U30	85.66	6.04	0.3575	56.68	9.34	0.2081	26.92	0	99.5538	0.451299	0.528133	0.0205681
	Recent Nevado	Crater U30	12.02	6.25	0.6221	57.1	8.55	0.2065	26.51	0	99.2593	0.41503	0.549013	0.0359563
	Recent Nevado	Crater U30	198.54	5.85	0.2345	55.94	9.89	0.2062	27.25	0.0231	99.4367	0.476499	0.510048	0.0134527
	Recent Nevado	Crater U30	45.54	5.8	0.3945	55.04	9.83	0.2052	27.81	0.0176	99.128	0.472697	0.504715	0.022588
	Recent Nevado	Crater U30	44.62	5.81	0.4438	56.03	9.98	0.2048	27.1	0.0139	99.6103	0.474732	0.500131	0.0251366
	Recent Nevado	Crater U30	59.16	5.71	0.4386	55.7	10.21	0.2041	27.26	0.0197	99.5953	0.484685	0.490523	0.0247915
	Recent Nevado	Crater U30	57.44	6.5	0.4977	57.86	8.43	0.2036	26.29	0.0036	99.7888	0.405577	0.565912	0.0285111
	Recent Nevado	Crater U30	99.77	6.15	0.3303	56.83	9.14	0.2034	27.03	0.0132	99.7099	0.442347	0.538619	0.0190339
	Recent Nevado	Crater U30	102.78	5.53	0.3648	55.09	10.68	0.2028	27.54	0.0165	99.4414	0.505643	0.473792	0.020565
	Recent Nevado	Crater U30	71.55	6.65	0.4654	57.83	8.28	0.2007	26.17	0.0166	99.6402	0.396776	0.576669	0.0265548
	Recent Nevado	Crater U30	31.42	6.35	0.5042	57.17	8.78	0.2004	26.52	0.0042	99.5318	0.42067	0.550566	0.0287641
	Recent Nevado	Crater U30	160.94	6.65	0.5899	57.9	8.52	0.1987	26.35	0.0052	100.235	0.40082	0.566136	0.0330437
	Recent Nevado	Crater U30	170.32	6.22	0.2741	56.76	9.47	0.1955	27.14	0.0065	100.097	0.449833	0.534664	0.0155028
	Recent Nevado	Crater U30	337.21	5.73	0.2821	55.88	10.22	0.195	27.6	0.0099	99.9583	0.48841	0.495538	0.0160523
	Recent Nevado	Crater U30	146.4	6.9	0.6619	58.93	7.73	0.1927	25.55	0.0064	100	0.368015	0.594463	0.0375215
	Recent Nevado	Crater U30	43.33	7.05	0.6192	59.27	7.46	0.1906	25.34	0.0093	99.9526	0.355998	0.608818	0.0351837
	Recent Nevado	Crater U30	236.62	5.82	0.2346	55.4	10.35	0.1903	27.5	0	99.5047	0.489099	0.497701	0.0132003
	Recent Nevado	Crater U30	52.09	5.34	0.2566	54.48	10.96	0.1886	28.6	0	99.8558	0.523677	0.461725	0.0145986
	Recent Nevado	Crater U30	43.84	5.98	0.435	56.15	9.68	0.1876	26.98	0.0088	99.4278	0.460524	0.514834	0.0246415
	Recent Nevado	Crater U30	254.98	6.2	0.2794	57.04	9.17	0.1873	26.45	0.0223	99.3672	0.442517	0.541429	0.0160542
	Recent Nevado	Crater U30	279.46	5.46	0.2088	54.81	10.84	0.1867	27.87	0.0073	99.4146	0.516949	0.471195	0.0118563
	Recent Nevado	Crater U30	156.21	5.8	0.264	56.23	9.69	0.1866	27.47	0.0036	99.6818	0.472679	0.511988	0.0153337
	Recent Nevado	Crater U30	127.99	6.15	0.2945	56.68	9.27	0.1803	27.07	0.0009	99.6693	0.44675	0.536351	0.0168994
	Recent Nevado	Crater U30	289.18	5.58	0.3047	55.68	10.27	0.1789	27.87	0.0186	99.9254	0.495405	0.487094	0.017501
	Recent Nevado	Crater U30	300.88	5.57	0.2323	55.27	10.46	0.1787	27.72	0.0155	99.4947	0.502493	0.48422	0.0132876
	Recent Nevado	Crater U30	144.26	6.31	0.5282	57.07	8.74	0.1775	26.9	0.0129	99.7842	0.420441	0.549304	0.0302547
	Recent Nevado	Crater U30	18.03	6.06	0.5149	56.86	9.24	0.1763	27.16	0	100.03	0.443816	0.526736	0.0294479
	Recent Nevado	Crater U30	108.1	6.05	0.3699	56.54	9.63	0.1751	27.06	0	99.8456	0.458164	0.520882	0.0209546
	Recent Nevado	Crater U30	107.47	6.57	0.332	57.35	8.87	0.1747	26.79	0.0103	100.143	0.419295	0.562018	0.0186868
	Recent Nevado	Crater U30	142.1	6.25	0.3008	56.85	9.19	0.1742	27	0	99.7732	0.440591	0.542238	0.0171711
	Recent Nevado	Crater U30	90.08	6.49	0.5751	56.85	8.5	0.1733	26.8	0.0124	99.407	0.40613	0.561152	0.0327183
	Recent Nevado	Crater U30	204.56	7.06	0.8425	58.98	7.48	0.173	25.41	0	99.9542	0.351849	0.600964	0.0471873
	Recent Nevado	Crater U30	88.24	5.71	0.4113	55.55	10.29	0.1724	27.45	0.0152	99.5989	0.487384	0.48942	0.0231961
	Recent Nevado	Crater U30	34.06	6.79	0.7703	58.61	7.48	0.1713	25.88	0	99.712	0.361622	0.594036	0.0443419
	Recent Nevado	Crater U30	61.84	5.9	0.3384	55.68	9.91	0.1712	27.38	0.0055	99.4065	0.472136	0.508668	0.0191966
	Recent Nevado	Crater U30	23.04	6.67	0.7293	58.26	7.77	0.1707	25.88	0	99.5328	0.375207	0.58286	0.0419331
	Recent Nevado	Crater U30	259.57	7.46	0.4601	60.04	6.89	0.1703	25.08	0	100.135	0.329072	0.644763	0.0261653
	Recent Nevado	Crater U30	268.24	6.47	0.529	57.12	8.43	0.17	26.49	0	99.2433	0.40591	0.563761	0.030329
	Recent Nevado	Crater U30	78.14	5.9	0.4864	56.16	9.43	0.1695	27.34	0	99.486	0.455865	0.516138	0.0279975
	Recent Nevado	Crater U30	215.2	5.62	0.259	55.61	10.23	0.1691	27.65	0.0106	99.6003	0.494	0.491108	0.014892
	Recent Nevado	Crater U30	150.94	5.43	0.256	55	10.62	0.1679	27.74	0.0079	99.2477	0.51178	0.473531	0.0146893
	Recent Nevado	Crater U30	89.16	5.83	0.4646	55.94	9.44	0.1676	27.41	0.0225	99.3109	0.459517	0.513555	0.0269283
	Recent Nevado	Crater U30	67.12	7.22	0.9231	59.74	6.7	0.1656	24.81	0	99.5701	0.321117	0.626203	0.0526791
	Recent Nevado	Crater U30	86.68	6.19	0.4459	56.86	9.19	0.1641	26.13	0	99.0124	0.43924	0.535384	0.0253761
	Recent Nevado	Crater U30	321.2	5.53	0.2848	55.67	10.2	0.1631	27.54	0.0058	99.4229	0.496439	0.487057	0.0165046
	Recent Nevado	Crater U30	122.68	6.78	0.3668	58.19	8.33	0.1628	26.33	0.0039	100.173	0.395987	0.583251	0.0207619
	Recent Nevado	Crater U30	411.67	6.31	0.3313	56.44	8.89	0.1623	27.04	0.0051	99.2223	0.429402	0.551544	0.0190539
	Recent Nevado	Crater U30	23.27	7.28	0.7943	58.73	6.82	0.1617	25.02	0	98.835	0.325695	0.629139	0.045166
	Recent Nevado	Crater U30	56.1	6.26	0.6138	57.08	8.52	0.1599	26.56	0.0149	99.2267	0.414012	0.550474	0.0355141
	Recent Nevado	Crater U30	129.52	5.65	0.2845	55.48	10.32	0.159	27.72	0	99.6404	0.494178	0.4896	0.0162214
	Recent Nevado	Crater U30	67.81	5.94	0.4024	55.33	9.6	0.1587	27.53	0.0149	99.0168	0.460911	0.516085	0.0230041
	Recent Nevado	Crater U30	228.63	5.61	0.2577	55.1	10.47	0.1584	28.05	0	99.6788	0.500266	0.485072	0.0146612
	Recent Nevado	Crater U30	193.78	6.37	0.3053	57.02	9.17	0.1578	26.6	0.016	99.6622	0.435405	0.547334	0.0172604
	Recent Nevado	Crater U30	213.94	6.28	0.307	56.92	9.35	0.1553	27.15	0	100.21	0.443548	0.539111	0.0173408
	Recent Nevado	Crater U30	18.51	6.54	0.573	57.58	8.46	0.1537	26.4	0	99.7196	0.403294	0.564181	0.0325243
	Recent Nevado	Crater U30	305.19	5.86	0.3148	55.98	9.88	0.1532	27.14	0.0055	99.3446	0.473651	0.50838	0.0179695
	Recent Nevado	Crater U30	258.04	5.69	0.2303	55.29	10.41	0.1527	27.66	0.0109	99.4764	0.496163	0.490767	0.0130698
	Recent Nevado	Crater U30	193.61	5.96	0.2123	55.93	9.94	0.1526	27.54	0.0054	99.7573	0.473826	0.514124	0.0120499
	Recent Nevado	Crater U30	122.22	6.46	0.5383	57.48	8.43	0.1522	26.6	0	99.6606	0.406047	0.56308	0.0308727
	Recent Nevado	Crater U30	158.59	5.96	0.1987	56.22	9.97	0.1511	27.5	0	100.021	0.474943	0.513786	0.0112706
	Recent Nevado	Crater U30	155.28	6.2	0.5237	56.87	9	0.1507	27.06	0	99.8103	0.431794	0.538289	0.029917
	Recent Nevado	Crater U30	77.05	7.03	0.4634	59.03	7.73	0.1504	25.66	0	100.066	0.368035	0.605695	0.0262704
	Recent Nevado	Crater U30	65.26	6.31	0.4549	57.01	9.1	0.1501	26.39	0.0061	99.453	0.432091	0.542191	0.0257188
	Recent Nevado	Crater U30	426.88	6.37	0.3357	56.84	8.83	0.1498	26.86	0	99.4206	0.425398	0.555345	0.0192569
	Recent Nevado	Crater U30	45.08	6.26	0.6512	57.53	8.33	0.1486	26.36	0.0097	99.3116	0.407661	0.554393	0.0379463
	Recent Nevado	Crater U30	350.83	6.68	0.3382	57.89	8.62	0.1483	26.57	0.0099	100.299	0.408318	0.572607	0.019075
	Recent Nevado	Crater U30	244.36	6.41	0.3072	57.19	9.11	0.148	26.94	0	100.136	0.432256	0.550389	0.0173558
	Recent Nevado	Crater U30	86.15	7.5	0.5031	60.29	6.53	0.1475	24.82	0.0085	99.8182	0.31544	0.655623	0.0289373
	Recent Nevado	Crater U30	46.63	6.41	0.4699	56.83	8.89	0.1474	26.44	0.0178	99.216	0.422343	0.551076	0.0265809
	Recent Nevado	Crater U30	69.12	7.92	0.5307	60.74	6.28	0.1465	24.56	0.0078	100.224	0.295611	0.674644	0.0297448
	Recent Nevado	Crater U30	211.12	5.79	0.2437	56.29	9.95	0.1449	27.62	0.0207	100.063	0.480261	0.505733	0.0140059
	Recent Nevado	Crater U30	156.89	6.83	0.5746	57.8	7.65	0.1438	25.9	0	98.8992	0.369674	0.597265	0.0330616
	Recent Nevado	Crater U30	111.2	6.81	0.6252	58.19	7.75	0.1436	25.92	0	99.459	0.372274	0.591967	0.0357587
	Recent Nevado	Crater U30	183.52	7.12	0.3546	58.83	7.76	0.1435	25.67	0	99.9061	0.368353	0.611605	0.020042
	Recent Nevado	Crater U30	366.04	6.57	0.3477	56.96	8.29	0.1426	26.54	0.0027	98.8602	0.402559	0.577337	0.0201039
	Recent Nevado	Crater U30	246.14	5.72	0.3121	55.55	10.22	0.1415	27.9	0	99.8651	0.487999	0.494257	0.0177444
	Recent Nevado	Crater U30	133.24	6.3	0.5153	57.12	8.64	0.1411	26.82	0	99.5579	0.418316	0.551977	0.0297066
	Recent Nevado	Crater U30	290.51	6.33	0.5566	56.67	8.76	0.1408	26.98	0	99.4404	0.419587	0.548669	0.031744
	Recent Nevado	Crater U30	106.06	5.95	0.2368	55.95	9.82	0.1392	27.6	0	99.7212	0.470549	0.51594	0.0135106
	Recent Nevado	Crater U30	88.55	5.96	0.2788	56.24	9.84	0.1371	27.55	0.0022	100.029	0.469525	0.514635	0.0158401
	Recent Nevado	Crater U30	176.1	5.8	0.1988	55.82	9.96	0.137	27.6	0.0086	99.5245	0.481333	0.507228	0.0114394
	Recent Nevado	Crater U30	171.3	7.36	0.48	59.43	7.08	0.1367	25.52	0	100.056	0.337619	0.635127	0.0272543
	Recent Nevado	Crater U30	137.89	7.61	0.4552	59.98	6.93	0.1364	25.02	0	100.141	0.326221	0.648265	0.0255142
	Recent Nevado	Crater U30	263.65	5.56	0.333	55.43	10.3	0.1361	27.8	0.0055	99.5894	0.496193	0.484705	0.0191011
	Recent Nevado	Crater U30	198.73	6.73	0.3322	57.85	8.49	0.1352	26.43	0.0056	100.01	0.403051	0.578171	0.0187781
	Recent Nevado	Crater U30	298.67	6.32	0.4177	56.95	9.17	0.1341	26.8	0	99.7972	0.434511	0.541923	0.0235666
	Recent Nevado	Crater U30	100.18	5.98	0.4395	56.25	9.46	0.1331	27.4	0.0263	99.7093	0.454701	0.520146	0.0251533
	Recent Nevado	Crater U30	289.99	6.84	0.3445	58.19	8.26	0.1327	26.11	0.022	99.9364	0.392435	0.588076	0.0194885
	Recent Nevado	Crater U30	442.09	6.5	0.3142	56.63	8.78	0.1324	26.85	0.0176	99.2373	0.41976	0.562354	0.017886
	Recent Nevado	Crater U30	396.46	6.47	0.3324	56.61	8.55	0.1322	26.73	0	98.8547	0.413962	0.566875	0.0191627
	Recent Nevado	Crater U30	112.35	7.35	0.7958	59.7	6.35	0.1313	24.68	0.0094	99.0617	0.308278	0.645721	0.0460016
	Recent Nevado	Crater U30	223.7	6.57	0.4924	57.27	8.25	0.1304	26.36	0.0049	99.1181	0.398059	0.573652	0.0282887
	Recent Nevado	Crater U30	168.31	7.18	0.3788	59.11	7.72	0.1286	25.6	0.0045	100.154	0.364768	0.613921	0.0213113
	Recent Nevado	Crater U30	153.1	7.29	0.4284	59.38	7.36	0.1283	25.24	0.0053	99.8714	0.34944	0.626342	0.0242184
	Recent Nevado	Crater U30	123.57	5.58	0.1756	55.06	10.66	0.1278	28.2	0.0182	99.8256	0.508423	0.481605	0.00997225
	Recent Nevado	Crater U30	172.36	5.5	0.2429	55.1	10.63	0.1273	27.8	0.0058	99.4298	0.509291	0.476853	0.0138567
	Recent Nevado	Crater U30	239.42	6.71	0.4625	57.85	8.08	0.1269	26.33	0.0038	99.5633	0.388961	0.584529	0.0265098
	Recent Nevado	Crater U30	92.26	6.67	0.3777	58.27	8.4	0.1262	26.39	0.0092	100.275	0.401531	0.576972	0.0214975
	Recent Nevado	Crater U30	190.02	7.04	0.9047	59.38	7.2	0.1259	25.06	0.0108	99.743	0.34258	0.606165	0.0512548
	Recent Nevado	Crater U30	335.62	6.45	0.316	57.38	8.95	0.1253	26.73	0.0012	99.9832	0.426224	0.555858	0.0179185
	Recent Nevado	Crater U30	381.25	6.57	0.3475	57.1	8.35	0.125	26.51	0	99.078	0.404299	0.575667	0.0200342
	Recent Nevado	Crater U30	53.53	6.68	0.4884	57.87	8.24	0.1235	26.28	0.007	99.7038	0.394073	0.578116	0.0278116
	Recent Nevado	Crater U30	320.41	6.42	0.3225	57.64	8.97	0.1235	26.72	0.0023	100.226	0.427717	0.553973	0.0183103
	Recent Nevado	Crater U30	229.15	6.47	0.3285	57.37	8.9	0.1233	26.7	0.0009	99.9276	0.423821	0.557553	0.0186264
	Recent Nevado	Crater U30	201.43	6.46	0.4458	56.95	8.48	0.1229	26.58	0.0076	99.061	0.409642	0.564716	0.0256419
	Recent Nevado	Crater U30	175.48	6.42	0.5812	57.28	8.97	0.1226	26.55	0	99.94	0.421526	0.545954	0.0325206
	Recent Nevado	Crater U30	281.16	6.35	0.4324	57.23	8.89	0.121	26.79	0	99.8387	0.42544	0.549921	0.024639
	Recent Nevado	Crater U30	71.04	6.09	0.3372	56.68	9.53	0.1198	27.25	0	100.04	0.454846	0.525991	0.0191629
	Recent Nevado	Crater U30	274.78	7.24	0.4183	59.24	7.5	0.1197	25.41	0.014	99.9908	0.355454	0.620941	0.0236054
	Recent Nevado	Crater U30	188.33	6.65	0.3819	57.78	8.34	0.1193	26.51	0	99.8019	0.400408	0.57776	0.0218317
	Recent Nevado	Crater U30	205.36	6.6	0.4002	57.62	8.55	0.1179	26.62	0	99.9082	0.407724	0.569552	0.0227237
	Recent Nevado	Crater U30	154.27	8	0.6022	61.24	5.78	0.1176	24.17	0.016	99.9362	0.275579	0.690235	0.0341869
	Recent Nevado	Crater U30	137.24	7.89	0.5756	60.82	6.11	0.1161	24.58	0.0014	100.097	0.28994	0.677537	0.0325228
	Recent Nevado	Crater U30	141.08	6.16	0.2211	56.68	9.41	0.1159	27.15	0.0172	99.7775	0.451957	0.535399	0.0126444
	Recent Nevado	Crater U30	179.16	6.51	0.4642	56.8	8.39	0.1139	26.49	0	98.7853	0.404856	0.568472	0.0266714
	Recent Nevado	Crater U30	36.02	6.85	0.6057	58.46	7.99	0.1131	25.96	0	100.014	0.378545	0.587287	0.0341687
	Recent Nevado	Crater U30	103.18	7.59	0.5135	60.34	6.57	0.1119	24.99	0.0026	100.151	0.314106	0.656662	0.0292316
	Recent Nevado	Crater U30	316.18	5.84	0.3458	56.3	9.65	0.1093	27.19	0	99.4788	0.467766	0.512275	0.0199585
	Recent Nevado	Crater U30	245.97	6.8	0.5533	57.78	7.94	0.1083	26.06	0.0092	99.2703	0.379827	0.588658	0.0315157
	Recent Nevado	Crater U30	333.69	6.39	0.3369	57.35	8.88	0.1082	26.68	0	99.7786	0.426008	0.554747	0.0192445
	Recent Nevado	Crater U30	222.39	6.53	0.4489	57.84	8.17	0.1065	26.34	0.0124	99.4478	0.398122	0.575832	0.0260462
	Recent Nevado	Crater U30	134.62	7.18	0.7239	58.47	7.1	0.106	25.36	0	98.9672	0.33882	0.620047	0.041133
	Recent Nevado	Crater U30	120.21	7.64	0.4978	59.98	6.7	0.1041	25.02	0	99.9453	0.317261	0.654672	0.0280671
	Recent Nevado	Crater U30	305.2	6.89	0.3647	58.29	8.16	0.0993	26.12	0	99.9295	0.387417	0.591966	0.020617
	Domes	Dome Cu	1	7.06	0.7251	60.21	6.57	0.578	24.15	0.1289	99.4429	0.325097	0.632181	0.0427215
	Domes	Dome Cu	144	6.73	0.419	58.48	8.25	0.337	25.71	0.0278	99.9733	0.394214	0.581946	0.0238393
	Domes	Dome Cu	1	5.62	0.2018	55.1	10.67	0.3159	28.06	0.0371	100.005	0.506158	0.482444	0.0113984
	Domes	Dome Cu	1	6.13	0.2038	56.61	9.57	0.3158	27.26	0.0171	100.144	0.45777	0.530622	0.0116076
	Domes	Dome Cu	29.84	4.85	0.1587	53.24	12.03	0.3031	28.94	0.0332	99.577	0.572976	0.418024	0.00900012
	Domes	Dome Cu	15.42	5.28	0.1705	54.11	11.45	0.3001	28.54	0.0202	99.8902	0.539894	0.450533	0.00957257
	Domes	Dome Cu	39.1	5.81	0.2	55.25	10.23	0.2976	27.28	0.0204	99.1125	0.487559	0.501091	0.0113496
	Domes	Dome Cu	1	5.94	0.2243	56.35	9.77	0.2855	27.22	0.0135	99.867	0.470022	0.517129	0.0128485
	Domes	Dome Cu	58.15	5.84	0.2058	55.59	9.94	0.2849	27.16	0.0067	99.0906	0.478961	0.509232	0.0118075
	Domes	Dome Cu	1	5.22	0.1858	54.82	11.03	0.2778	28.28	0.0124	99.8575	0.532915	0.456396	0.0106888
	Domes	Dome Cu	10.37	5.86	0.228	55.99	9.92	0.2713	27.43	0.0063	99.7312	0.477017	0.509928	0.0130544
	Domes	Dome Cu	20.05	5.71	0.2059	55.29	10.25	0.2653	27.4	0.0121	99.148	0.492123	0.496106	0.0117708
	Domes	Dome Cu	1	6.32	0.2317	56.6	9.5	0.2633	27.2	0.0177	100.18	0.447844	0.53915	0.0130056
	Domes	Dome Cu	77.2	5.66	0.1992	55.29	10.41	0.261	27.21	0.0166	99.0903	0.498332	0.490314	0.0113543
	Domes	Dome Cu	19.36	5.73	0.2059	55.93	10.19	0.2497	27.8	0.0047	100.13	0.489802	0.498414	0.0117843
	Domes	Dome Cu	70.42	5.56	0.1815	55.22	10.64	0.2486	27.91	0	99.7744	0.508662	0.481007	0.0103315
	Domes	Dome Cu	1	6.17	0.2118	56.47	9.41	0.248	27.12	0.0282	99.6639	0.451805	0.536087	0.0121084
	Domes	Dome Cu	96.25	5.96	0.2083	55.76	9.85	0.2416	27	0.0284	99.0723	0.471666	0.516457	0.0118765
	Domes	Dome Cu	47.28	6.47	0.2412	57.17	9.2	0.2383	26.84	0.0038	100.176	0.434055	0.552395	0.0135499
	Domes	Dome Cu	12.22	6.07	0.1895	56.4	9.78	0.2328	27.49	0.0217	100.201	0.465934	0.523316	0.0107497
	Domes	Dome Cu	115.3	5.55	0.1885	54.84	10.65	0.2321	27.52	0.0085	99.0118	0.509134	0.480136	0.0107299
	Domes	Dome Cu	45.88	6.36	0.2235	56.97	9.24	0.2306	27.16	0.0061	100.213	0.439679	0.547658	0.0126631
	Domes	Dome Cu	11.19	5.98	0.2276	56.09	9.95	0.225	27.75	0.0124	100.242	0.472851	0.51427	0.0128788
	Domes	Dome Cu	1	6.13	0.2137	56.3	9.48	0.2245	27.34	0.0076	99.7165	0.455168	0.532615	0.0122171
	Domes	Dome Cu	24.14	6.02	0.2229	56.35	9.59	0.2228	27.27	0.004	99.7051	0.462183	0.525026	0.012791
	Domes	Dome Cu	1	6.35	0.2485	57.06	9.21	0.2153	26.96	0.0127	100.067	0.438634	0.547274	0.0140919
	Domes	Dome Cu	16.33	6.1	0.2017	56.34	9.69	0.2111	27.34	0.0139	99.921	0.462113	0.526434	0.0114533
	Domes	Dome Cu	34.66	6.1	0.2031	56.6	9.66	0.2105	27.25	0.0042	100.082	0.461306	0.527146	0.0115484
	Domes	Dome Cu	93.56	5.84	0.2026	56.16	10.04	0.2035	27.76	0	100.226	0.481547	0.506882	0.0115703
	Domes	Dome Cu	324.96	5.85	0.2082	56.29	10.15	0.1986	27.53	0.0114	100.244	0.483697	0.50449	0.0118138
	Domes	Dome Cu	14	6.55	0.2433	57.44	8.73	0.1984	26.34	0	99.5018	0.418249	0.567872	0.0138792
	Domes	Dome Cu	37.72	6.37	0.2452	57.28	9.22	0.1975	27.04	0.0197	100.386	0.438228	0.547895	0.0138768
	Domes	Dome Cu	19.9	7.1	0.2988	58.64	8.04	0.1951	25.88	0.0097	100.172	0.378457	0.604795	0.0167472
	Domes	Dome Cu	116.7	6.56	0.2628	57.65	8.85	0.193	26.59	0	100.153	0.420746	0.564378	0.0148766
	Domes	Dome Cu	57.1	6.04	0.2037	56.64	9.67	0.1895	27.37	0.0089	100.139	0.463952	0.524412	0.0116369
	Domes	Dome Cu	92	6.83	0.2649	58.36	8.26	0.1884	25.91	0.0011	99.8433	0.394551	0.590382	0.0150663
	Domes	Dome Cu	31.66	6.54	0.2327	57.34	8.94	0.1863	26.57	0.0173	99.8457	0.424662	0.562177	0.0131614
	Domes	Dome Cu	40	6.01	0.1991	56.15	9.79	0.1832	27.19	0.0022	99.5658	0.468355	0.520303	0.0113414
	Domes	Dome Cu	23.44	6.8	0.2563	57.58	8.32	0.1818	26.03	0.0277	99.2071	0.397503	0.587916	0.0145803
	Domes	Dome Cu	56.08	6.77	0.2785	58.78	8.18	0.1813	26.31	0.012	100.54	0.393974	0.590055	0.0159713
	Domes	Dome Cu	278.68	6.57	0.2617	57.64	8.72	0.1812	26.41	0.0178	99.806	0.416809	0.568297	0.0148945
	Domes	Dome Cu	38.8	6.82	0.2641	58.02	8.37	0.1757	26.39	0.0115	100.051	0.398076	0.586968	0.0149558
	Domes	Dome Cu	27	6.14	0.2221	56.63	9.5	0.1756	27.03	0.0076	99.7072	0.455077	0.532254	0.0126681
	Domes	Dome Cu	79	6.6	0.247	57.66	8.74	0.1738	26.38	0.0042	99.8351	0.416634	0.569346	0.0140198
	Domes	Dome Cu	58.68	5.8	0.2009	55.32	10.47	0.1727	27.83	0	99.8519	0.49375	0.494969	0.0112808
	Domes	Dome Cu	66	6.52	0.2434	57.41	8.84	0.1702	26.42	0.0074	99.6372	0.422389	0.563763	0.0138478
	Domes	Dome Cu	76.6	6.81	0.2683	57.74	8.48	0.168	26.53	0	100.027	0.401458	0.583418	0.015124
	Domes	Dome Cu	118	6.89	0.2811	58.28	8.2	0.1678	25.82	0	99.6473	0.39042	0.593644	0.015936
	Domes	Dome Cu	57.22	6.55	0.2297	57.45	8.85	0.1646	26.52	0.0028	99.7976	0.421899	0.565062	0.0130385
	Domes	Dome Cu	41.76	6.47	0.275	57.27	9.02	0.1629	26.82	0.0056	100.027	0.428387	0.556062	0.0155512
	Domes	Dome Cu	274.98	6.59	0.2739	57.51	8.7	0.1621	26.64	0.0139	99.89	0.415243	0.569191	0.015566
	Domes	Dome Cu	57.7	6.97	0.2834	58.42	8.03	0.1609	26.05	0	99.9204	0.382735	0.601181	0.0160836
	Domes	Dome Cu	258.04	6.16	0.2097	56.33	9.61	0.16	27.75	0.0105	100.275	0.457467	0.530647	0.011886
	Domes	Dome Cu	19.74	7.23	0.3153	59.53	7.48	0.159	25.43	0.0137	100.166	0.357228	0.624843	0.0179295
	Domes	Dome Cu	85.33	6.85	0.276	58.59	8.06	0.1587	25.45	0	99.3976	0.387787	0.596401	0.0158113
	Domes	Dome Cu	129.52	5.84	0.1906	56.24	9.71	0.158	27.6	0.0168	99.7808	0.473539	0.515393	0.0110678
	Domes	Dome Cu	44.26	6.54	0.2692	57.18	8.89	0.1576	26.68	0.013	99.7595	0.422418	0.562351	0.0152306
	Domes	Dome Cu	73.1	6.48	0.2743	57.33	9.04	0.1566	26.62	0	99.9188	0.428578	0.555938	0.0154842
	Domes	Dome Cu	95.5	7.01	0.2926	58.28	8.07	0.1565	26.11	0.0069	99.9635	0.382394	0.601097	0.0165087
	Domes	Dome Cu	138.97	7.05	0.2904	59.04	7.65	0.156	25.63	0.0202	99.8555	0.36861	0.614729	0.0166611
	Domes	Dome Cu	172.45	7.39	0.3418	59.19	7.22	0.1556	25	0.0059	99.3045	0.343807	0.636813	0.0193799
	Domes	Dome Cu	246.14	6.96	0.2689	58.1	8.08	0.1546	26.07	0.0045	99.6432	0.38485	0.5999	0.0152501
	Domes	Dome Cu	139.84	7.15	0.2976	58.78	7.84	0.1543	25.83	0.0034	100.077	0.37098	0.612252	0.0167675
	Domes	Dome Cu	74.44	6.12	0.2324	56.97	9.35	0.1536	27.5	0.0134	100.339	0.451655	0.534978	0.0133669
	Domes	Dome Cu	62.32	7.43	0.3114	59.45	7.34	0.1531	24.98	0.0255	99.7233	0.346941	0.635533	0.0175259
	Domes	Dome Cu	53	7.29	0.2979	59.07	7.52	0.153	25.21	0	99.5551	0.356958	0.626205	0.0168372
	Domes	Dome Cu	111.16	6.44	0.2491	57.37	8.99	0.1521	26.8	0	100.003	0.429309	0.556527	0.014164
	Domes	Dome Cu	276.4	5.98	0.2112	56.31	9.74	0.1505	27.73	0	100.141	0.467976	0.519942	0.0120826
	Domes	Dome Cu	47.85	6.53	0.2403	57.42	8.84	0.1498	26.48	0	99.7033	0.422098	0.56424	0.0136621
	Domes	Dome Cu	38.98	5.85	0.1893	55.57	10.26	0.1497	28.11	0.0113	100.17	0.486909	0.502395	0.0106967
	Domes	Dome Cu	77.65	7.49	0.3033	59.98	7.07	0.1457	24.93	0.012	99.9509	0.336903	0.645888	0.0172091
	Domes	Dome Cu	31.57	6.84	0.2947	58.14	8.41	0.144	26.35	0	100.199	0.397848	0.585553	0.0165998
	Domes	Dome Cu	123.64	7.2	0.2963	58.75	7.71	0.1435	25.58	0	99.6831	0.365539	0.617734	0.0167268
	Domes	Dome Cu	92.71	6.47	0.2374	57.09	9.21	0.1434	27.15	0.0091	100.34	0.434414	0.552253	0.0133329
	Domes	Dome Cu	82.52	6.32	0.2482	56.99	9.28	0.1413	27.27	0	100.264	0.441644	0.544291	0.0140646
	Domes	Dome Cu	89.62	8.15	0.4119	61.18	5.86	0.1399	23.99	0	99.7369	0.277739	0.699015	0.0232452
	Domes	Dome Cu	51.64	6.73	0.2479	57.45	8.82	0.1393	26.6	0	100.007	0.414202	0.571936	0.0138618
	Domes	Dome Cu	313.12	5.6	0.1839	55.26	10.41	0.1384	28.3	0	99.9077	0.501375	0.488078	0.0105462
	Domes	Dome Cu	331.48	5.44	0.1624	55.13	10.65	0.1384	28.56	0	100.116	0.514798	0.475855	0.00934703
	Domes	Dome Cu	116.36	6.87	0.27	58.21	8.32	0.138	26.06	0	99.8691	0.394806	0.589938	0.0152555
	Domes	Dome Cu	174.04	6.64	0.2527	57.66	8.61	0.138	26.26	0.0031	99.5831	0.411434	0.574188	0.0143781
	Domes	Dome Cu	114.4	7.13	0.3023	58.45	7.89	0.137	26.04	0.0022	99.971	0.373004	0.609979	0.0170167
	Domes	Dome Cu	162.98	7.44	0.3411	59.87	7.08	0.1367	25	0	99.8858	0.337951	0.642662	0.0193867
	Domes	Dome Cu	101.94	5.94	0.2031	55.93	9.95	0.1365	27.55	0	99.7199	0.475144	0.513308	0.0115482
	Domes	Dome Cu	51.95	6.39	0.2452	57.03	9.32	0.1362	27.13	0.0132	100.278	0.440132	0.546081	0.0137876
	Domes	Dome Cu	62.14	6.48	0.248	57	9.14	0.1359	27.1	0	100.168	0.431913	0.554133	0.0139541
	Domes	Dome Cu	102.28	8.26	0.4014	61.39	5.83	0.1358	24.12	0.0065	100.153	0.274282	0.703232	0.0224858
	Domes	Dome Cu	294.76	5.98	0.2085	56.24	9.89	0.1352	27.87	0	100.366	0.471855	0.516301	0.0118446
	Domes	Dome Cu	105	7.06	0.2975	58.69	8.04	0.1352	25.77	0	99.9928	0.379779	0.603488	0.0167326
	Domes	Dome Cu	92.8	7.06	0.2692	59	7.81	0.1346	26.12	0.0051	100.402	0.373568	0.6111	0.0153318
	Domes	Dome Cu	458.2	7.92	0.4033	60.6	6.31	0.1345	24.27	0	99.6379	0.298734	0.678531	0.0227345
	Domes	Dome Cu	246.7	7.64	0.3593	59.91	6.9	0.1345	25.14	0.0209	100.105	0.326189	0.653586	0.0202245
	Domes	Dome Cu	202.96	5.4	0.1657	54.95	10.71	0.1336	28.77	0	100.172	0.51791	0.47255	0.00954087
	Domes	Dome Cu	286.75	7.15	0.3148	58.32	7.89	0.1336	25.63	0	99.4628	0.372105	0.610217	0.0176777
	Domes	Dome Cu	152.2	8.02	0.4308	61.39	5.78	0.1334	24.14	0.0056	99.945	0.277802	0.697544	0.0246538
	Domes	Dome Cu	21.38	6.79	0.3016	57.94	8.56	0.1333	26.49	0	100.252	0.40365	0.579416	0.0169342
	Domes	Dome Cu	231.72	7.18	0.3048	58.54	7.63	0.133	25.67	0	99.4697	0.363575	0.619132	0.0172936
	Domes	Dome Cu	260.56	6.74	0.2556	57.4	8.62	0.133	26.55	0.0042	99.7064	0.40812	0.577471	0.0144093
	Domes	Dome Cu	420.1	7.43	0.3584	59.42	7.14	0.1328	24.96	0	99.4417	0.339801	0.639889	0.0203093
	Domes	Dome Cu	92.98	7.05	0.2866	58.94	7.78	0.1325	25.66	0.0041	99.8726	0.372621	0.611035	0.0163442
	Domes	Dome Cu	188.46	6.62	0.2525	57.2	8.75	0.1323	26.72	0	99.6975	0.416065	0.569639	0.014296
	Domes	Dome Cu	108.31	7.05	0.2733	58.89	7.83	0.1322	25.66	0.0059	99.8447	0.374403	0.610037	0.0155603
	Domes	Dome Cu	265.6	7.39	0.3323	59.43	7.3	0.1321	25.54	0.0046	100.13	0.346484	0.634737	0.0187798
	Domes	Dome Cu	248.65	7	0.3036	58.38	8.1	0.1303	25.87	0.0043	99.8413	0.383361	0.59953	0.0171091
	Domes	Dome Cu	209.26	6.92	0.2923	58.69	8.18	0.1301	26.06	0.0004	100.289	0.388586	0.59488	0.0165335
	Domes	Dome Cu	64.3	7.28	0.3095	58.82	7.73	0.1301	25.64	0.0111	99.9487	0.363378	0.619298	0.0173237
	Domes	Dome Cu	72.33	6.48	0.2512	57.12	9.17	0.13	27.07	0.0225	100.3	0.432639	0.553249	0.0141116
	Domes	Dome Cu	133.3	7.07	0.2951	58.78	7.85	0.1297	26.02	0	100.187	0.373891	0.609374	0.0167357
	Domes	Dome Cu	13.66	7.56	0.3296	59.85	7.14	0.1292	25.29	0.0037	100.325	0.336582	0.644917	0.0185004
	Domes	Dome Cu	343.9	7.98	0.4153	60.97	6.1	0.1283	24.14	0.0119	99.7619	0.289988	0.686504	0.0235079
	Domes	Dome Cu	29.11	6.85	0.2933	58.79	7.73	0.1274	25.71	0	99.5104	0.37753	0.605413	0.0170563
	Domes	Dome Cu	301.82	6.39	0.2359	57.4	9.16	0.126	26.77	0	100.109	0.436099	0.550528	0.0133727
	Domes	Dome Cu	147.88	5.61	0.1773	55.52	10.37	0.1259	28.23	0	100.044	0.500166	0.489652	0.0101823
	Domes	Dome Cu	46.99	7.59	0.3273	60.05	6.89	0.1257	24.8	0.0043	99.8084	0.327864	0.653591	0.0185448
	Domes	Dome Cu	1	7.08	0.2957	58.63	7.97	0.1254	25.63	0.0085	99.7461	0.377113	0.606227	0.0166596
	Domes	Dome Cu	171.1	7.86	0.3857	60.37	6.3	0.1248	24.7	0	99.7759	0.300244	0.677869	0.0218869
	Domes	Dome Cu	76.96	8.19	0.4103	61.13	5.93	0.1239	24.18	0.008	99.9952	0.279198	0.6978	0.0230017
	Domes	Dome Cu	184.6	5.57	0.1797	55.44	10.52	0.1235	28.48	0.0026	100.369	0.505439	0.484281	0.0102802
	Domes	Dome Cu	130.78	7.22	0.3093	58.9	7.72	0.1234	25.68	0.0041	99.9867	0.364946	0.617644	0.0174098
	Domes	Dome Cu	305.8	7.17	0.3142	58.49	7.8	0.1232	25.16	0.0104	99.0975	0.368809	0.613501	0.0176894
	Domes	Dome Cu	401.05	7.25	0.3218	58.78	7.6	0.1229	25.46	0.0099	99.5775	0.360139	0.621704	0.018157
	Domes	Dome Cu	26.32	6.15	0.2058	56.46	9.74	0.1223	27.39	0.0015	100.08	0.4613	0.527095	0.0116057
	Domes	Dome Cu	186.12	7.21	0.3195	59.24	7.52	0.1215	25.61	0	100.04	0.358987	0.622852	0.0181607
	Domes	Dome Cu	202.88	5.54	0.1833	54.9	10.58	0.1213	28.28	0	99.6255	0.508078	0.481441	0.0104811
	Domes	Dome Cu	454.6	5.61	0.1731	54.8	10.84	0.1211	28.53	0	100.099	0.511366	0.478911	0.00972301
	Domes	Dome Cu	153.4	7.36	0.3474	59.51	7.26	0.1208	24.87	0.0025	99.4898	0.345838	0.634458	0.0197045
	Domes	Dome Cu	66.59	6.71	0.2553	58	8.38	0.1197	26.13	0.0043	99.6162	0.40237	0.583034	0.014596
	Domes	Dome Cu	210.55	6.81	0.2804	57.8	8.43	0.1196	26.21	0	99.6603	0.399764	0.584403	0.0158327
	Domes	Dome Cu	127.6	8.11	0.3917	61.01	6.05	0.1195	24.19	0	99.8802	0.285479	0.692514	0.0220076
	Domes	Dome Cu	439.15	7.93	0.4021	60.77	6.23	0.1188	24.38	0	99.8534	0.295834	0.681431	0.022735
	Domes	Dome Cu	255.54	6.29	0.2325	57.2	9.21	0.1185	27.07	0.0136	100.159	0.441316	0.545419	0.0132652
	Domes	Dome Cu	114.94	8.04	0.4005	60.99	6.13	0.1185	24.3	0	99.99	0.289748	0.687711	0.0225405
	Domes	Dome Cu	38.48	6.82	0.2716	58.3	8.38	0.1183	26.03	0.0212	99.9613	0.398193	0.58644	0.0153667
	Domes	Dome Cu	360.1	7.21	0.3108	58.91	7.85	0.1164	25.98	0.03	100.436	0.369108	0.613491	0.0174007
	Domes	Dome Cu	229.6	7.06	0.3213	59.11	7.74	0.1158	25.65	0.0037	100.012	0.370361	0.611333	0.0183061
	Domes	Dome Cu	362.95	8.16	0.4479	60.81	5.83	0.1146	23.6	0	98.9671	0.275913	0.698848	0.0252398
	Domes	Dome Cu	217.3	6.06	0.2212	55.86	9.66	0.1142	27.58	0	99.4958	0.462428	0.524963	0.0126082
	Domes	Dome Cu	382	7.1	0.3132	58.88	7.72	0.1125	25.5	0	99.6433	0.36865	0.613542	0.0178082
	Domes	Dome Cu	140.26	8.06	0.385	60.96	6.07	0.1123	24.4	0.0078	100.037	0.287487	0.690802	0.0217115
	Domes	Dome Cu	208.9	7.44	0.3362	59.2	7.31	0.112	25.42	0.0009	99.8327	0.345236	0.635858	0.0189059
	Domes	Dome Cu	397.9	8.13	0.4107	60.24	6.07	0.1111	24.24	0	99.2296	0.285361	0.691649	0.0229896
	Domes	Dome Cu	75.96	6.67	0.2506	58.14	8.31	0.1078	25.83	0	99.3149	0.401865	0.583706	0.0144298
	Domes	Dome Cu	303.4	7.09	0.2887	58.42	8	0.1078	26.06	0.0192	99.9897	0.377822	0.605944	0.0162347
	Domes	Dome Cu	221.32	5.68	0.1818	55.55	10.39	0.1075	28.26	0.0053	100.219	0.497483	0.492153	0.0103647
	Domes	Dome Cu	239.68	6.36	0.225	56.54	9.35	0.1075	27.46	0.0004	100.092	0.442559	0.544761	0.0126807
	Domes	Dome Cu	349.84	6.81	0.27	58.69	8.05	0.1073	26.13	0	100.09	0.388982	0.595484	0.0155345
	Domes	Dome Cu	232.4	6.78	0.2753	58.57	8.15	0.106	26.07	0	99.9705	0.392826	0.591374	0.0157998
	Domes	Dome Cu	341.2	6.99	0.2887	58.39	8.05	0.1057	26.44	0	100.267	0.382549	0.601115	0.0163357
	Domes	Dome Cu	145.2	6.04	0.2157	56.39	9.89	0.105	27.43	0.0037	100.074	0.469232	0.518582	0.0121855
	Domes	Dome Cu	159.62	6.67	0.2657	57.37	8.63	0.105	26.45	0	99.5217	0.410628	0.574319	0.0150533
	Domes	Dome Cu	416.8	7.22	0.3106	58.58	7.75	0.1042	25.9	0	99.8701	0.365819	0.616724	0.0174569
	Domes	Dome Cu	90.76	7.37	0.3266	59.39	7.37	0.1022	25.48	0.0072	100.066	0.349358	0.632208	0.018434
	Domes	Dome Cu	190	7.45	0.3315	59.4	7.12	0.1016	25.35	0.0125	99.772	0.339105	0.642096	0.0187992
	Domes	Dome Cu	227.8	7.65	0.3413	59.8	6.92	0.1013	25.36	0.0154	100.231	0.326877	0.653927	0.0191962
	Domes	Dome Cu	87.52	7.44	0.3475	59.44	7.43	0.1007	25.23	0.0124	100.032	0.348705	0.631876	0.0194189
	Domes	Dome Cu	284.5	7.14	0.2956	58.69	7.85	0.0974	25.97	0.0056	100.058	0.371638	0.611699	0.0166631
	Domes	Dome Cu	166.24	5.25	0.1543	55.02	10.91	0.0968	28.62	0.0171	100.096	0.529759	0.46132	0.00892114
	Domes	Dome Cu	191.5	7.03	0.2962	58.42	7.91	0.0956	25.5	0.0077	99.2663	0.376947	0.606246	0.016807
	Domes	Dome Cu	322.3	7.21	0.3035	58.72	7.83	0.0953	26.06	0.0072	100.252	0.368665	0.61432	0.0170149
	Domes	Dome Cu	379	7.28	0.3129	58.82	7.81	0.0944	25.97	0.0056	100.294	0.365694	0.616861	0.0174451
	Domes	Dome Cu	134.35	7.06	0.3055	58.66	7.83	0.0938	25.47	0.0124	99.4516	0.373395	0.609258	0.0173468
	Domes	Dome Cu	324.85	7.16	0.3014	58.71	7.71	0.0933	25.44	0	99.4227	0.366692	0.616239	0.0170683
	Domes	Dome Cu	435.7	6.25	0.2265	56.11	9.68	0.0929	27.47	0	99.8359	0.455318	0.531996	0.0126855
	Domes	Dome Cu	113.2	7.1	0.296	58.57	7.78	0.0915	26.07	0.0177	99.9734	0.370815	0.612386	0.0167985
	Domes	Dome Cu	146.86	7.16	0.2927	58.82	7.73	0.0903	25.9	0.0121	100.042	0.367475	0.615957	0.0165681
	Domes	Dome Cu	267.7	6.88	0.2778	58.11	8.38	0.09	26.15	0.0015	99.9031	0.396011	0.588357	0.0156314
	Domes	Dome Cu	101.98	7.1	0.3103	58.86	7.71	0.0888	25.89	0.0062	99.977	0.368409	0.613936	0.0176546
	Domes	Dome Cu	158.08	7.08	0.2691	58.72	7.81	0.088	26	0.0036	99.9748	0.372924	0.611776	0.0152998
	Domes	Dome Cu	124.42	7.07	0.3041	58.77	7.66	0.0877	25.92	0	99.8508	0.367983	0.614622	0.0173947
	Domes	Dome Cu	135.64	7.22	0.286	59.08	7.59	0.0864	25.89	0	100.192	0.361497	0.622284	0.0162192
	Domes	Dome Cu	68.32	7.34	0.3275	59.54	7.24	0.084	25.5	0	100.044	0.346202	0.635151	0.0186468
	Domes	Dome Cu	79.54	7.25	0.3083	59.42	7.38	0.0832	25.64	0.0029	100.088	0.35367	0.628738	0.0175921
	Domes	Dome Te	19	4.6	0.2543	52.88	11.94	0.5485	29.03	0.0298	99.309	0.580539	0.404738	0.0147223
	Domes	Dome Te	13	4.69	0.2838	53.3	11.57	0.5364	28.88	0.0423	99.3167	0.567294	0.416137	0.0165687
	Domes	Dome Te	25	4.46	0.2415	52.89	12.18	0.5296	29.35	0.0561	99.7502	0.593033	0.392966	0.0140007
	Domes	Dome Te	31	4.49	0.2073	52.72	12.2	0.5206	29.48	0.0492	99.7048	0.593037	0.394964	0.0119984
	Domes	Dome Te	37	4.53	0.2352	52.95	12.06	0.4937	29.08	0.0543	99.4033	0.587214	0.39915	0.013636
	Domes	Dome Te	43	4.41	0.211	53	12.25	0.489	29.41	0.0636	99.8891	0.598095	0.389639	0.0122664
	Domes	Dome Te	1	6.95	0.5804	58.44	7.64	0.4866	25.73	0	99.8628	0.365411	0.601536	0.0330534
	Domes	Dome Te	22.91	5.6	0.3172	55.68	10.02	0.4256	27.93	0.0149	100.03	0.488028	0.493576	0.0183955
	Domes	Dome Te	52.75	7.28	0.9653	59.41	6.39	0.4055	24.91	0.0073	99.3797	0.308495	0.636016	0.0554894
	Domes	Dome Te	125.2	7.76	1.0936	61.32	5.29	0.4019	23.6	0.0083	99.5216	0.256362	0.680533	0.0631042
	Domes	Dome Te	30.75	7.46	0.7932	59.79	6.1	0.4018	24.34	0.0014	98.9325	0.29692	0.657108	0.0459719
	Domes	Dome Te	135.55	7.78	1.37	61.17	4.97	0.3968	23.58	0.0084	99.2939	0.240327	0.680793	0.0788801
	Domes	Dome Te	54.92	6.86	0.7699	58.42	6.99	0.3853	25.07	0.0212	98.5518	0.343983	0.610905	0.0451123
	Domes	Dome Te	104.5	7.19	0.8691	59.04	6.7	0.3843	25.05	0	99.2508	0.322953	0.627166	0.049881
	Domes	Dome Te	94.15	7.32	0.9052	59.08	6.41	0.3832	24.7	0.0187	98.8546	0.30915	0.638868	0.0519824
	Domes	Dome Te	35	7.17	0.814	59.32	6.31	0.38	24.59	0	98.5846	0.311539	0.640608	0.047853
	Domes	Dome Te	63.1	7.14	0.9754	59.39	6.56	0.3773	24.88	0.0271	99.4012	0.317796	0.62594	0.0562638
	Domes	Dome Te	22.25	7.72	0.8187	59.91	6.03	0.3753	24.21	0.0122	99.1096	0.287483	0.666042	0.0464751
	Domes	Dome Te	66.16	7.53	0.8544	60.14	5.97	0.3741	24.24	0.0255	99.1808	0.289611	0.661037	0.0493519
	Domes	Dome Te	73.45	7.22	0.8987	59	6.72	0.3701	24.94	0.0173	99.2262	0.322216	0.626475	0.051309
	Domes	Dome Te	32.05	7.81	1.31	60.98	4.83	0.3699	23.32	0	98.6476	0.235346	0.688651	0.0760031
	Domes	Dome Te	9.5	8.21	1.0288	61.67	4.74	0.3684	23.12	0.0173	99.1881	0.227644	0.713525	0.0588313
	Domes	Dome Te	21.22	7.28	0.8471	59.17	6.37	0.3671	24.53	0.0099	98.5952	0.309935	0.64099	0.0490757
	Domes	Dome Te	58.92	7.66	0.8537	60.11	6.01	0.3648	24.46	0.0145	99.5019	0.287722	0.663615	0.0486636
	Domes	Dome Te	15.48	7.5	1.0314	60.35	5.63	0.3641	23.58	0.0049	98.5297	0.275571	0.664318	0.0601109
	Domes	Dome Te	83.8	7.19	0.866	59.54	6.6	0.3634	24.85	0.0151	99.4371	0.319731	0.630316	0.0499527
	Domes	Dome Te	51.68	7.37	0.845	59.68	6.29	0.3632	24.6	0.0018	99.1838	0.30485	0.646387	0.0487633
	Domes	Dome Te	44.44	7.29	0.8837	59.5	6.48	0.3539	24.7	0.0012	99.2495	0.312675	0.636553	0.0507719
	Domes	Dome Te	8.24	7.65	1.1325	61.16	5.16	0.3535	23.34	0.0014	98.8237	0.253536	0.680207	0.0662567
	Domes	Dome Te	18	7.82	0.9244	60.46	5.54	0.3526	23.61	0.0049	98.7742	0.266449	0.680613	0.0529377
	Domes	Dome Te	14.48	7.8	1.0534	60.56	5.26	0.3522	23.6	0.0182	98.6872	0.254976	0.684223	0.0608006
	Domes	Dome Te	34.7	7.2	0.8369	58.96	6.51	0.347	24.65	0.0337	98.5704	0.317007	0.634468	0.0485247
	Domes	Dome Te	26.5	7.46	0.795	59.76	6.15	0.3458	24.19	0.0147	98.7481	0.298596	0.655445	0.0459596
	Domes	Dome Te	42.4	7.76	1.1441	60.52	5.36	0.3412	23.64	0	98.7878	0.258127	0.676269	0.0656044
	Domes	Dome Te	61.66	6.79	0.7137	58.22	7.22	0.3385	25.4	0.0081	98.7132	0.354666	0.603589	0.0417445
	Domes	Dome Te	13.75	8.23	1.0067	61.62	4.89	0.3353	22.99	0.0025	99.1169	0.233058	0.709813	0.0571289
	Domes	Dome Te	29.96	7.3	0.924	59.83	6.23	0.3312	24.13	0.0107	98.812	0.303303	0.643134	0.0535627
	Domes	Dome Te	41.44	7.23	0.8619	58.89	6.4	0.3284	24.73	0.0172	98.5195	0.312045	0.637918	0.0500374
	Domes	Dome Te	7	6.8	0.5291	58.19	7.97	0.3245	26.12	0.0309	99.9831	0.38124	0.588624	0.0301355
	Domes	Dome Te	1	6.62	4.99	63.61	2.56	0.3212	20.8	0	98.952	0.124992	0.584911	0.290097
	Domes	Dome Te	37.2	7.34	0.8882	59.82	6.19	0.3185	24.3	0.0054	98.9075	0.301506	0.64698	0.0515131
	Domes	Dome Te	5.25	8.21	1.0242	62.03	4.52	0.3129	22.87	0	99.0074	0.219454	0.721336	0.0592095
	Domes	Dome Te	145.9	7.75	1.47	61.3	4.71	0.312	22.99	0.0099	98.603	0.229925	0.684631	0.0854444
	Domes	Dome Te	1	8.39	1.39	63.03	4.01	0.2897	22.37	0.0056	99.5062	0.192346	0.728266	0.0793879
	Domes	Dome Te	1	8.02	1.29	62	4.56	0.2844	22.53	0.0225	98.7309	0.22126	0.70421	0.0745297
	Domes	Dome Te	7.74	8.11	1.21	61.32	4.85	0.274	23.22	0	99.0191	0.231318	0.699967	0.0687153
	Domes	Dome Te	1	8.4	1.32	62.4	4.28	0.2648	22.82	0	99.5054	0.2033	0.722043	0.0746568
	Domes	Dome Te	11.35	8.41	1.2038	62.3	4.44	0.2634	22.94	0.0017	99.5841	0.210503	0.72154	0.0679565
	Domes	Dome Te	1	7.06	0.5254	58.62	7.54	0.2434	25.73	0.0207	99.7477	0.36005	0.610077	0.0298732
	Domes	Dome Te	98.52	5.27	0.2276	54.52	11.28	0.2258	28.89	0.0176	100.458	0.534908	0.452241	0.0128512
	Domes	Dome Te	1	6.95	0.5505	58.91	7.75	0.2253	25.7	0	100.097	0.369357	0.599403	0.0312394
	Domes	Dome Te	74.14	5.66	0.2563	55.57	10.46	0.2127	28.24	0	100.426	0.497913	0.48756	0.0145269
	Domes	Dome Te	122.9	5.22	0.2535	54.5	11.28	0.2109	28.85	0	100.338	0.536425	0.449221	0.0143542
	Domes	Dome Te	135.09	5.3	0.2467	54.66	11.45	0.2062	28.95	0.0049	100.823	0.536683	0.449549	0.0137684
	Domes	Dome Te	1	7.98	0.6163	61.2	5.67	0.205	24.22	0.0027	99.915	0.272012	0.692783	0.0352045
	Domes	Dome Te	15.31	7.66	0.687	60.13	6.47	0.2015	24.95	0	100.124	0.305914	0.655409	0.038677
	Domes	Dome Te	62.84	5.81	0.2549	55.81	10.31	0.1985	27.96	0.0015	100.361	0.487991	0.497644	0.0143656
	Domes	Dome Te	16.42	6.9	0.5485	59	7.82	0.1968	25.79	0.0001	100.27	0.3731	0.59574	0.0311599
	Domes	Dome Te	52.26	7.22	0.5378	59.43	7.44	0.1963	25.33	0	100.163	0.351842	0.617875	0.0302828
	Domes	Dome Te	110.71	5.24	0.2309	54.57	11.33	0.192	28.79	0.0012	100.385	0.537288	0.449674	0.0130377
	Domes	Dome Te	86.33	5.73	0.2667	55.82	10.42	0.1884	28	0	100.466	0.493682	0.491273	0.0150454
	Domes	Dome Te	1	7.31	0.5816	59.79	7.21	0.1877	25.18	0.0129	100.288	0.341207	0.626021	0.0327723
	Domes	Dome Te	159.94	6.95	0.3916	58.9	7.79	0.1848	25.94	0.005	100.206	0.373923	0.603696	0.0223814
	Domes	Dome Te	47.38	6.06	0.3291	56.6	9.71	0.1846	27.36	0.0006	100.276	0.460884	0.520516	0.0185995
	Domes	Dome Te	23.21	7.29	0.6272	59.31	6.98	0.1818	25.27	0	99.664	0.333668	0.630632	0.0356998
	Domes	Dome Te	381.19	7.61	0.4321	59.87	6.94	0.1804	25.2	0	100.239	0.326961	0.648799	0.0242394
	Domes	Dome Te	212.92	7.86	0.4775	61.15	6.09	0.1798	24.34	0.0167	100.133	0.291636	0.681138	0.0272268
	Domes	Dome Te	257.3	6.69	0.3694	57.11	9	0.1789	26.8	0.0078	100.156	0.417706	0.56188	0.0204139
	Domes	Dome Te	513.6	7.07	0.4393	58.88	7.6	0.1784	25.84	0	100.087	0.363338	0.611655	0.0250069
	Domes	Dome Te	13.19	7.5	0.6364	60.06	6.99	0.1765	25.19	0.0065	100.606	0.327862	0.636596	0.0355422
	Domes	Dome Te	334.19	7.27	0.4382	58.78	7.6	0.1752	25.85	0.0019	100.148	0.357181	0.618298	0.0245215
	Domes	Dome Te	26.63	7.2	0.5621	59.36	7.43	0.1751	25.54	0.0027	100.305	0.351656	0.616667	0.031677
	Domes	Dome Te	282.93	6.79	0.3943	57.54	8.36	0.1733	26.22	0.0068	99.531	0.395892	0.581875	0.022233
	Domes	Dome Te	77.89	6.7	0.3831	58.12	8.48	0.173	26.37	0	100.226	0.402646	0.575694	0.0216591
	Domes	Dome Te	103.52	6.4	0.326	57.13	9.23	0.173	26.84	0	100.128	0.435382	0.546308	0.0183099
	Domes	Dome Te	45.42	7.46	0.6842	60.14	6.53	0.1727	24.98	0.012	100.008	0.313272	0.647644	0.0390834
	Domes	Dome Te	1	7.47	0.6108	59.08	6.87	0.1725	24.96	0.0117	99.1751	0.325358	0.640199	0.0344433
	Domes	Dome Te	231.67	7.01	0.4399	58.68	7.93	0.1709	25.66	0	99.9182	0.375131	0.600091	0.0247779
	Domes	Dome Te	35.2	7.15	0.4367	59.64	7.52	0.1708	25.5	0.0212	100.456	0.358457	0.616757	0.0247858
	Domes	Dome Te	31.84	7.36	0.6546	60.07	7.01	0.1708	25.23	0.0113	100.523	0.332097	0.630978	0.0369253
	Domes	Dome Te	1	7.3	0.5845	60.22	6.82	0.1702	25.07	0.0063	100.172	0.329051	0.63737	0.0335788
	Domes	Dome Te	49.76	5.94	0.3046	56.12	10.03	0.1689	27.72	0	100.324	0.474414	0.508431	0.0171549
	Domes	Dome Te	132.52	7.29	0.4467	58.4	7.33	0.1688	25.28	0	98.946	0.348151	0.626586	0.0252628
	Domes	Dome Te	88.68	7.28	0.5001	58.51	7.33	0.1687	25.27	0.0154	99.0866	0.347401	0.624378	0.0282218
	Domes	Dome Te	66.76	7.35	0.5581	58.63	7.24	0.1686	25.11	0.0057	99.0753	0.341424	0.627238	0.0313378
	Domes	Dome Te	106.96	7.48	0.4894	59.88	6.97	0.1678	25.26	0	100.302	0.330508	0.64186	0.0276321
	Domes	Dome Te	401.2	7.58	0.4332	59.61	7.15	0.1674	25.35	0.0121	100.303	0.334381	0.641496	0.0241227
	Domes	Dome Te	359.82	7.47	0.4645	59.75	7.04	0.1671	25.42	0.008	100.363	0.333475	0.640326	0.0261986
	Domes	Dome Te	616.12	6.53	0.3389	57.4	9.02	0.167	26.92	0.0026	100.413	0.424663	0.556339	0.0189981
	Domes	Dome Te	37.57	7.09	0.4777	58.95	7.91	0.1663	25.92	0	100.546	0.371204	0.602104	0.0266927
	Domes	Dome Te	101.05	7.07	0.3443	58.66	8.02	0.1663	26.06	0.0122	100.373	0.377874	0.602811	0.0193157
	Domes	Dome Te	110.6	7.08	0.4697	58.56	7.59	0.165	25.57	0	99.4605	0.362094	0.611226	0.0266809
	Domes	Dome Te	245.31	6.99	0.3764	58.33	7.5	0.1638	25.85	0.0089	99.2366	0.364122	0.614119	0.0217589
	Domes	Dome Te	29.62	7.89	0.6929	61.29	5.8	0.1636	24	0.0033	99.8972	0.277472	0.683058	0.0394696
	Domes	Dome Te	124.36	6.41	0.3678	57.45	8.98	0.1634	27.03	0.0047	100.445	0.42726	0.551903	0.0208367
	Domes	Dome Te	206.04	7.21	0.4648	59.25	7.55	0.1631	25.58	0.0447	100.284	0.35696	0.616874	0.0261661
	Domes	Dome Te	154.44	7.37	0.4594	58.93	7.39	0.163	25.19	0	99.5043	0.347373	0.626915	0.0257125
	Domes	Dome Te	1	7.58	0.6617	60.45	6.67	0.1628	24.87	0.0073	100.407	0.314996	0.647795	0.0372084
	Domes	Dome Te	1000.57	5.28	0.2067	54.62	11.15	0.1625	28.84	0.0091	100.315	0.532195	0.456057	0.0117473
	Domes	Dome Te	307.88	7.41	0.4396	59.25	7.08	0.1619	25.14	0.0089	99.5109	0.336938	0.638152	0.0249101
	Domes	Dome Te	18.66	7.5	0.606	60.22	6.84	0.1613	25.23	0	100.558	0.323653	0.642205	0.0341426
	Domes	Dome Te	155.2	6.81	0.4067	58.41	8.16	0.1613	26.3	0.0097	100.289	0.389168	0.587737	0.0230952
	Domes	Dome Te	176.36	7.45	0.4104	58.65	7.26	0.161	25.2	0.0104	99.1698	0.341963	0.63502	0.0230171
	Domes	Dome Te	201.98	7.83	0.4535	60.49	6.32	0.1606	24.63	0.016	99.924	0.300532	0.67379	0.0256775
	Domes	Dome Te	373.47	8.24	0.5348	61.31	5.42	0.1603	23.73	0.0091	99.4398	0.258488	0.711143	0.0303692
	Domes	Dome Te	31.92	6.71	0.4633	58.38	8.22	0.1596	26.21	0	100.156	0.393033	0.58059	0.0263767
	Domes	Dome Te	25.38	7.4	0.5915	59.75	7.14	0.1595	25.4	0	100.448	0.336229	0.630605	0.0331659
	Domes	Dome Te	221.11	7.79	0.4331	60.19	6.69	0.1595	24.88	0.0041	100.162	0.314045	0.661747	0.0242078
	Domes	Dome Te	129.15	7.5	0.417	59.54	7.33	0.1595	25.33	0.0007	100.286	0.342544	0.634253	0.0232033
	Domes	Dome Te	325.9	7.9	0.515	60.38	6.09	0.1592	24.34	0.0037	99.4222	0.29001	0.680788	0.0292014
	Domes	Dome Te	641.75	5.25	0.2075	54.76	11.2	0.1584	28.84	0.0078	100.437	0.534667	0.453538	0.0117946
	Domes	Dome Te	1	7.44	0.5632	58.78	7.16	0.1583	25.43	0.0099	99.5585	0.336241	0.632267	0.0314921
	Domes	Dome Te	564.86	6.8	0.3941	58.37	8.17	0.1582	26.3	0.01	100.212	0.390074	0.587521	0.0224044
	Domes	Dome Te	18.1	7.22	0.5134	59.44	7.55	0.1581	25.7	0	100.581	0.355682	0.615519	0.0287986
	Domes	Dome Te	693.01	5.12	0.1917	54.36	11.62	0.1579	29.1	0.0173	100.62	0.550357	0.438832	0.0108109
	Domes	Dome Te	22.92	7.52	0.6592	59.13	6.74	0.1578	24.76	0	98.9671	0.318928	0.643931	0.0371407
	Domes	Dome Te	264.04	7.33	0.4143	59.16	7.21	0.1578	25.17	0	99.4458	0.343859	0.632614	0.0235267
	Domes	Dome Te	89.3	7.15	0.4952	59.54	7.39	0.1575	25.61	0	100.347	0.353276	0.618537	0.0281872
	Domes	Dome Te	139.78	6.5	0.376	57.93	8.55	0.1574	26.57	0.0101	100.132	0.411844	0.566591	0.0215653
	Domes	Dome Te	44.82	7.3	0.5271	59.56	7.09	0.1573	25.39	0.0053	100.048	0.338782	0.631228	0.0299894
	Domes	Dome Te	124.68	7.84	0.4706	60.64	6.4	0.1572	24.61	0.0062	100.168	0.302632	0.670872	0.0264964
	Domes	Dome Te	361.18	7.92	0.518	60.55	6.49	0.1568	24.64	0.0087	100.288	0.302719	0.668512	0.028769
	Domes	Dome Te	261.13	7.75	0.4158	60.34	6.54	0.1565	24.79	0	100.001	0.310546	0.665945	0.0235089
	Domes	Dome Te	154.78	7.2	0.4184	59.28	7.55	0.1565	25.37	0	99.9817	0.358202	0.618162	0.023636
	Domes	Dome Te	539.23	7.56	0.5174	59.74	6.76	0.1565	25.05	0.0258	99.8262	0.321036	0.649707	0.0292573
	Domes	Dome Te	321.16	7.03	0.3657	58.56	8.04	0.1563	26.01	0	100.217	0.379297	0.600161	0.0205423
	Domes	Dome Te	436.71	7.52	0.4619	59.7	7.18	0.1562	25.44	0.0217	100.494	0.336483	0.637743	0.0257743
	Domes	Dome Te	198.28	7.35	0.427	58.93	7.38	0.156	25.22	0.0066	99.4697	0.348291	0.627715	0.0239946
	Domes	Dome Te	949.31	5.33	0.2261	54.55	11.25	0.1555	28.64	0.0083	100.164	0.53155	0.45573	0.0127202
	Domes	Dome Te	846.79	5.13	0.201	54.32	11.67	0.1554	29.08	0.0141	100.61	0.550661	0.438046	0.011293
	Domes	Dome Te	161.08	6.94	0.3477	58.23	8.23	0.1547	26.36	0	100.283	0.388156	0.592318	0.0195259
	Domes	Dome Te	170.62	6.68	0.3832	57.73	8.67	0.1545	26.37	0.0008	99.9984	0.408681	0.569811	0.0215076
	Domes	Dome Te	1	7.26	0.5926	59.42	7.25	0.1544	25.33	0	100.014	0.343708	0.622841	0.0334514
	Domes	Dome Te	1	7.13	0.57	59.39	7.11	0.1544	25.37	0.0165	99.748	0.343622	0.623577	0.032801
	Domes	Dome Te	178.68	7	0.4036	58.57	7.62	0.1543	25.72	0	99.4693	0.366911	0.609949	0.0231397
	Domes	Dome Te	171.06	7.4	0.4109	59.74	7.13	0.1542	25.49	0	100.358	0.339354	0.63736	0.0232863
	Domes	Dome Te	61.03	7.58	0.4668	60.08	6.8	0.1541	25.03	0	100.123	0.322691	0.650933	0.026376
	Domes	Dome Te	385.45	7.48	0.4893	59.8	7.01	0.1539	25.15	0	100.106	0.331777	0.640648	0.0275743
	Domes	Dome Te	285.96	7.48	0.4337	59.37	7.08	0.1536	25.25	0.0081	99.8278	0.33503	0.640533	0.0244366
	Domes	Dome Te	62.68	7.87	0.7239	61.01	6	0.1524	24.23	0.0062	100.004	0.28431	0.674847	0.0408433
	Domes	Dome Te	439.2	8.08	0.523	60.82	5.7	0.1521	24.05	0.0065	99.3478	0.272147	0.69812	0.0297325
	Domes	Dome Te	1	6.99	0.5085	58.94	7.82	0.1513	25.96	0.0074	100.41	0.37106	0.600211	0.0287296
	Domes	Dome Te	66.73	7.68	0.5452	60.25	6.38	0.1508	24.78	0.0196	99.8166	0.304868	0.664112	0.0310204
	Domes	Dome Te	395.38	8.28	0.5514	61.24	5.5	0.1508	23.92	0.0063	99.6486	0.260167	0.708776	0.0310568
	Domes	Dome Te	177.6	7.49	0.4282	60.2	6.92	0.1495	25.14	0.0028	100.331	0.329776	0.645927	0.0242974
	Domes	Dome Te	230.58	7.79	0.4683	60.88	6.37	0.1495	24.65	0.012	100.343	0.302978	0.6705	0.0265215
	Domes	Dome Te	52.3	7.15	0.4131	59.15	7.31	0.1492	25.06	0.0011	99.2658	0.352447	0.623838	0.0237155
	Domes	Dome Te	265.9	7.67	0.4569	60.65	6.65	0.1492	24.89	0.0111	100.488	0.315557	0.658628	0.0258153
	Domes	Dome Te	78.3	8.17	0.5515	61.65	5.54	0.1489	24.06	0	100.135	0.264044	0.704658	0.0312978
	Domes	Dome Te	69.4	7.45	0.4492	59.94	6.78	0.1486	24.85	0	99.642	0.326015	0.648266	0.0257187
	Domes	Dome Te	36.32	7.74	0.6476	60.78	6.49	0.1483	24.79	0.0111	100.63	0.305159	0.658584	0.0362568
	Domes	Dome Te	16.46	7.14	0.542	59.42	7.43	0.148	25.6	0.0086	100.297	0.353875	0.615388	0.030737
	Domes	Dome Te	308.56	7.18	0.4575	58.87	7.51	0.1479	25.65	0.0175	99.8764	0.356806	0.617313	0.0258812
	Domes	Dome Te	93.76	8.13	0.5491	61.51	5.69	0.1477	24.08	0	100.124	0.270231	0.698718	0.0310509
	Domes	Dome Te	21.01	7.84	0.607	60.7	6.4	0.1476	24.71	0.0152	100.428	0.300325	0.665759	0.0339157
	Domes	Dome Te	112.05	7.6	0.4894	59.91	6.69	0.1476	24.97	0.0082	99.8153	0.318179	0.654106	0.0277147
	Domes	Dome Te	186.52	7.35	0.3876	59.78	7.19	0.1473	25.41	0	100.272	0.343161	0.634812	0.0220269
	Domes	Dome Te	81.04	7.08	0.3696	58.75	7.69	0.1471	25.57	0.0014	99.6404	0.3672	0.611786	0.021014
	Domes	Dome Te	462.34	7.1	0.4038	58.66	7.83	0.147	25.89	0.008	100.047	0.370053	0.607224	0.0227232
	Domes	Dome Te	71.64	7.33	0.5425	59.98	6.88	0.1468	25.1	0	100.015	0.33092	0.63801	0.0310696
	Domes	Dome Te	44.84	7.5	0.6179	59.14	6.78	0.1464	24.75	0	98.9507	0.321511	0.6436	0.0348887
	Domes	Dome Te	61.95	5.78	0.2833	56.05	10.31	0.1464	28.02	0.0256	100.632	0.488464	0.495554	0.0159816
	Domes	Dome Te	301.22	7.58	0.4199	59.85	6.95	0.1461	25.06	0.015	100.06	0.328342	0.648037	0.0236205
	Domes	Dome Te	795.53	5.19	0.2151	54.3	11.39	0.146	28.88	0.0064	100.169	0.541399	0.446427	0.012174
	Domes	Dome Te	172.72	8.04	0.4959	60.68	5.95	0.1458	24.19	0	99.5166	0.282126	0.689876	0.0279976
	Domes	Dome Te	220.1	7.14	0.3674	58.53	7.79	0.1458	25.9	0	99.8823	0.368353	0.610962	0.0206855
	Domes	Dome Te	172	7.64	0.4331	60.05	7.06	0.1457	25.22	0	100.562	0.329887	0.646016	0.0240963
	Domes	Dome Te	108.94	6.96	0.48	58.82	7.78	0.1456	25.93	0.0089	100.144	0.371422	0.601293	0.0272854
	Domes	Dome Te	272.89	8.16	0.5004	61.1	5.69	0.1456	23.94	0	99.5583	0.270278	0.70142	0.028302
	Domes	Dome Te	241.12	7.72	0.433	60.46	6.55	0.1452	24.8	0	100.108	0.311373	0.664118	0.0245091
	Domes	Dome Te	180.41	6.68	0.3558	57.86	8.58	0.1451	26.48	0.0066	100.126	0.40679	0.573124	0.0200858
	Domes	Dome Te	248.36	6.7	0.3137	58.07	8.36	0.1443	26.53	0	100.118	0.400805	0.581287	0.0179078
	Domes	Dome Te	248.24	7.84	0.4665	60.75	6.36	0.1442	24.43	0.0018	99.9965	0.30138	0.672299	0.0263214
	Domes	Dome Te	769.9	5.03	0.209	54.05	11.6	0.1442	29.05	0	100.13	0.553665	0.434457	0.0118778
	Domes	Dome Te	93.52	7.27	0.5532	59.69	7.14	0.1441	25.26	0.0057	100.078	0.340735	0.627831	0.0314342
	Domes	Dome Te	181.09	8	0.4899	61.41	5.97	0.1438	24.27	0.0005	100.308	0.283876	0.688387	0.0277372
	Domes	Dome Te	718.64	5.3	0.2241	54.47	11.31	0.1433	28.75	0.008	100.214	0.534301	0.453094	0.0126057
	Domes	Dome Te	281.14	7.86	0.4659	60.43	6.64	0.1431	24.96	0.0189	100.527	0.310014	0.664086	0.0259004
	Domes	Dome Te	229.96	8.18	0.5119	60.86	5.73	0.1431	23.79	0	99.2151	0.271021	0.70015	0.0288293
	Domes	Dome Te	220.2	7.28	0.4063	58.88	7.31	0.1429	25.25	0.0019	99.3207	0.348629	0.628299	0.0230724
	Domes	Dome Te	441.22	7.73	0.4677	60.21	6.53	0.1423	24.76	0	99.8517	0.309841	0.663735	0.0264237
	Domes	Dome Te	487.54	6.19	0.2615	56.32	9.58	0.1422	27.2	0	99.7224	0.45418	0.531058	0.0147617
	Domes	Dome Te	141.07	6.92	0.3318	58.09	8.38	0.142	26.27	0.0141	100.172	0.39347	0.58798	0.01855
	Domes	Dome Te	974.94	5.34	0.207	54.46	11.11	0.1418	28.64	0.0043	99.9377	0.528547	0.459727	0.0117258
	Domes	Dome Te	667.38	5.08	0.2049	54.07	11.67	0.1416	29.13	0	100.311	0.5529	0.435541	0.011559
	Domes	Dome Te	67.63	7.55	0.5772	59.82	6.63	0.1416	24.78	0.0026	99.5143	0.316016	0.651226	0.0327584
	Domes	Dome Te	274.6	7.82	0.5121	60.48	6.15	0.1415	24.39	0.008	99.5384	0.294103	0.676738	0.0291595
	Domes	Dome Te	315.82	7.27	0.365	58.67	7.56	0.1411	25.6	0.0083	99.6616	0.357437	0.622015	0.0205481
	Domes	Dome Te	154.37	8.16	0.5369	61.64	5.56	0.1411	23.94	0	99.9968	0.265193	0.704315	0.0304917
	Domes	Dome Te	487.97	7.18	0.4347	59.04	7.66	0.1408	25.84	0	100.295	0.36182	0.613731	0.0244486
	Domes	Dome Te	89.84	7.61	0.5472	59.97	6.58	0.1402	24.91	0	99.7602	0.313291	0.655687	0.031022
	Domes	Dome Te	283.56	7.53	0.4313	60.23	6.77	0.1388	25.04	0	100.163	0.323768	0.651672	0.0245598
	Domes	Dome Te	43.93	8.11	0.6099	60.99	6.07	0.1388	24.33	0	100.263	0.28269	0.683489	0.0338206
	Domes	Dome Te	923.68	5.22	0.2027	54.66	11.32	0.1384	28.81	0.0169	100.383	0.538852	0.449659	0.0114889
	Domes	Dome Te	590.49	6.56	0.3478	57.47	8.84	0.1378	26.82	0	100.19	0.418456	0.561941	0.0196032
	Domes	Dome Te	504.93	8.14	0.5469	61.09	5.47	0.1372	23.9	0	99.2842	0.26233	0.70644	0.0312299
	Domes	Dome Te	120.7	7.46	0.4152	59.63	7.02	0.1365	24.92	0.0104	99.5985	0.33406	0.642414	0.0235259
	Domes	Dome Te	72.55	8.09	0.5301	61.14	5.95	0.1365	24.17	0	100.028	0.280382	0.689875	0.0297434
	Domes	Dome Te	154.9	7.61	0.4391	59.6	6.8	0.1364	24.84	0.0082	99.4642	0.322365	0.652849	0.0247858
	Domes	Dome Te	483.02	7.44	0.3904	58.84	7.14	0.1361	25.21	0	99.1806	0.338895	0.639041	0.0220637
	Domes	Dome Te	134.26	7.47	0.4871	60.12	6.6	0.1354	24.84	0	99.6641	0.318873	0.653106	0.0280216
	Domes	Dome Te	78.1	7.57	0.6256	60.55	6.57	0.1349	24.93	0	100.411	0.312652	0.6519	0.0354481
	Domes	Dome Te	421.21	7.8	0.4829	60.45	6.42	0.1349	24.61	0	99.9132	0.30412	0.668642	0.0272376
	Domes	Dome Te	88.64	7.83	0.5411	60.55	6.02	0.1345	24.39	0.0024	99.4736	0.288955	0.680119	0.0309252
	Domes	Dome Te	201.1	7.77	0.4396	60.34	6.68	0.1342	24.9	0	100.276	0.314142	0.661242	0.0246155
	Domes	Dome Te	411.08	7.54	0.505	60.18	6.67	0.1342	25.03	0	100.075	0.318896	0.652355	0.0287485
	Domes	Dome Te	401.68	6.95	0.358	57.89	8.18	0.1342	25.75	0.0023	99.2838	0.386155	0.593722	0.020123
	Domes	Dome Te	279.28	7.23	0.3664	58.74	7.74	0.134	25.79	0.0026	100.025	0.364066	0.615413	0.0205209
	Domes	Dome Te	330.13	7.41	0.3652	58.74	7.41	0.134	24.93	0.0138	99.0198	0.348637	0.630904	0.0204591
	Domes	Dome Te	308.8	7.84	0.5218	60.52	6.1	0.1338	24.25	0.0012	99.4038	0.291743	0.678542	0.029715
	Domes	Dome Te	101.17	8.2	0.5009	61.08	5.92	0.1338	24.32	0.018	100.185	0.277214	0.694858	0.0279283
	Domes	Dome Te	223.3	7.89	0.5034	60.65	6.25	0.1332	24.09	0.0017	99.5408	0.295825	0.675804	0.0283706
	Domes	Dome Te	132.46	8	0.544	61.16	5.74	0.133	23.98	0.0102	99.5886	0.275105	0.69385	0.0310446
	Domes	Dome Te	103.6	7.48	0.4401	59.99	6.96	0.1329	25.01	0.0088	100.03	0.331113	0.643958	0.0249298
	Domes	Dome Te	336.54	7.48	0.4499	59.91	7.03	0.1329	25.12	0.0027	100.13	0.333148	0.641465	0.0253863
	Domes	Dome Te	142.28	7.31	0.4461	59.84	7.25	0.1326	25.39	0	100.376	0.345081	0.629636	0.0252823
	Domes	Dome Te	155.6	7.65	0.4187	60.12	6.99	0.1325	25.19	0.0084	100.548	0.327674	0.648956	0.0233705
	Domes	Dome Te	821.16	5.31	0.2296	54.71	11.03	0.1321	28.68	0	100.135	0.527436	0.459492	0.0130727
	Domes	Dome Te	291.7	7.95	0.5088	60.41	6.28	0.1317	24.43	0.0173	99.7683	0.295219	0.676302	0.0284795
	Domes	Dome Te	872.42	5.12	0.2026	54.22	11.52	0.131	29.04	0.0121	100.289	0.547879	0.440648	0.0114729
	Domes	Dome Te	526.84	7.98	0.4641	60.13	6.13	0.1309	24.24	0.0044	99.0841	0.290199	0.68364	0.0261606
	Domes	Dome Te	744.27	5.06	0.2086	54.07	11.37	0.1308	28.8	0.0119	99.6546	0.54729	0.440754	0.0119556
	Domes	Dome Te	307.74	7.79	0.4594	60	6.29	0.1305	24.63	0.0051	99.305	0.300468	0.673402	0.02613
	Domes	Dome Te	461.23	7.5	0.4355	59.79	7.06	0.1304	25.2	0.0015	100.123	0.333794	0.641689	0.0245168
	Domes	Dome Te	115.48	8.02	0.4795	61.09	6.01	0.1299	24.35	0.0067	100.122	0.284913	0.688021	0.0270662
	Domes	Dome Te	86.5	7.33	0.3913	58.95	7.4	0.1296	25.47	0.0044	99.7095	0.350205	0.627746	0.0220496
	Domes	Dome Te	318.88	7.58	0.4351	59.9	6.92	0.1296	25.24	0	100.216	0.327109	0.648402	0.0244893
	Domes	Dome Te	41.02	6.92	0.4116	58.39	8.2	0.1296	26.15	0.0051	100.221	0.386561	0.590336	0.0231036
	Domes	Dome Te	481.24	7.67	0.4457	59.61	6.99	0.1296	25.18	0.0039	100.057	0.326627	0.648575	0.0247981
	Domes	Dome Te	201.34	8.09	0.5147	61.01	5.8	0.1296	24.03	0	99.5856	0.275499	0.695391	0.0291103
	Domes	Dome Te	358.75	7	0.3546	58.07	8.1	0.1289	25.9	0.0011	99.5916	0.382263	0.597811	0.0199258
	Domes	Dome Te	244.27	8.2	0.5175	60.83	5.78	0.1283	23.99	0	99.4523	0.27219	0.698792	0.0290173
	Domes	Dome Te	473.23	5.76	0.2309	55.55	10.37	0.1277	27.79	0	99.839	0.492207	0.494744	0.0130495
	Domes	Dome Te	417.29	8.21	0.5558	61.21	5.5	0.1277	23.87	0	99.5165	0.26167	0.706844	0.0314855
	Domes	Dome Te	240.4	7.96	0.495	60.71	6.26	0.1266	24.37	0.0146	99.9443	0.294532	0.677737	0.027731
	Domes	Dome Te	53.98	7.75	0.6406	60.69	6.32	0.1266	24.59	0.002	100.14	0.299421	0.664441	0.0361371
	Domes	Dome Te	121.06	6.62	0.2933	57.7	8.73	0.1266	26.8	0.0095	100.303	0.41455	0.568866	0.0165835
	Domes	Dome Te	373.06	7.25	0.358	58.64	7.56	0.1266	25.59	0.0135	99.554	0.358191	0.621613	0.0201965
	Domes	Dome Te	263.92	7.13	0.3731	58.76	7.62	0.1265	25.72	0.021	99.7725	0.36343	0.615382	0.0211881
	Domes	Dome Te	109.22	8.01	0.5075	61.31	5.79	0.1263	24.18	0.0061	99.9518	0.277174	0.693898	0.0289275
	Domes	Dome Te	144.1	7.63	0.4874	61.31	5.97	0.1263	24.57	0	100.11	0.293254	0.678239	0.0285073
	Domes	Dome Te	430.3	7.51	0.4206	59.41	7.16	0.126	25.23	0	99.8698	0.336924	0.63951	0.0235661
	Domes	Dome Te	58.24	8.12	0.5667	60.91	6.07	0.1255	24.49	0.0032	100.299	0.28313	0.685396	0.0314739
	Domes	Dome Te	124.62	7.53	0.4784	59.99	6.96	0.1254	25.06	0	100.173	0.328983	0.644092	0.026925
	Domes	Dome Te	287.2	7.4	0.3916	58.91	7.16	0.1254	25.32	0	99.3205	0.340668	0.637147	0.0221851
	Domes	Dome Te	242.01	7.34	0.3945	58.87	7.33	0.1251	25.54	0	99.6156	0.347683	0.630036	0.0222807
	Domes	Dome Te	516.16	6.24	0.2916	56.53	9.45	0.125	27.04	0	99.6934	0.448095	0.535441	0.0164637
	Domes	Dome Te	198.19	7.27	0.3967	59.2	7.12	0.1244	25.23	0.0084	99.363	0.34316	0.634074	0.0227656
	Domes	Dome Te	206.2	7.65	0.4756	59.83	6.7	0.1242	24.73	0.0104	99.5442	0.317386	0.655788	0.026826
	Domes	Dome Te	47.26	7.5	0.6773	60.2	6.76	0.1239	25.01	0	100.311	0.319793	0.642056	0.0381509
	Domes	Dome Te	301.15	7.41	0.4033	59.6	7.28	0.1236	25.49	0	100.314	0.34389	0.633426	0.0226839
	Domes	Dome Te	110.55	8.37	0.5847	61.73	5.25	0.1236	23.77	0.02	99.8742	0.2489	0.718093	0.0330065
	Domes	Dome Te	257.5	7.9	0.5135	60.69	6.23	0.1234	24.5	0.0043	99.9855	0.294737	0.676337	0.028926
	Domes	Dome Te	242.12	7.53	0.4039	58.98	7.34	0.1234	25.14	0.0164	99.5538	0.342232	0.635344	0.0224233
	Domes	Dome Te	158.41	8.02	0.504	60.7	5.97	0.1233	24.11	0	99.4274	0.283162	0.688374	0.0284638
	Domes	Dome Te	217.44	7.3	0.4012	59.57	7.27	0.1231	25.42	0.0086	100.11	0.346884	0.630322	0.0227936
	Domes	Dome Te	176.28	7.81	0.4994	60.9	5.85	0.1229	24.07	0.0182	99.2706	0.284287	0.686817	0.0288968
	Domes	Dome Te	351.56	8.12	0.525	60.72	5.69	0.1224	23.9	0	99.0872	0.270833	0.699413	0.0297542
	Domes	Dome Te	444.61	6.47	0.3084	57.11	9.03	0.1214	26.71	0.0124	99.7768	0.427851	0.554751	0.0173988
	Domes	Dome Te	501.85	6.49	0.3027	57.14	9.18	0.1206	26.82	0	100.056	0.431292	0.551775	0.0169333
	Domes	Dome Te	544.78	5.76	0.2385	55.77	10.19	0.1196	27.74	0	99.8388	0.48762	0.498791	0.0135893
	Domes	Dome Te	559.09	5.68	0.2476	55.31	10.42	0.1191	28.09	0.0122	99.9045	0.496344	0.489613	0.0140432
	Domes	Dome Te	458.92	5.46	0.2166	54.72	11.06	0.1182	28.31	0.0041	99.8983	0.521736	0.466098	0.0121662
	Domes	Dome Te	285.83	7.06	0.3619	58.16	7.79	0.1167	25.77	0.0158	99.2745	0.371007	0.60847	0.0205227
	Domes	Dome Te	898.05	5.32	0.204	54.4	11.15	0.1161	28.81	0.014	100.062	0.530444	0.458	0.0115557
	Domes	Dome Te	189.1	7.29	0.4144	59.34	7.17	0.1154	25.26	0	99.5918	0.343792	0.632549	0.0236591
	Domes	Dome Te	263.82	6.91	0.3439	58.16	8.08	0.1153	26.03	0.007	99.6476	0.384872	0.595624	0.0195046
	Domes	Dome Te	415.99	6.78	0.3229	57.49	8.51	0.1152	26.11	0.011	99.3474	0.402103	0.579731	0.0181667
	Domes	Dome Te	140.14	7.39	0.3905	59.5	7.22	0.1138	25.39	0.0012	100.013	0.342861	0.635059	0.0220802
	Domes	Dome Te	344.44	7.17	0.3551	58.23	7.86	0.1132	25.72	0.0085	99.4827	0.369746	0.610364	0.0198899
	Domes	Dome Te	215.65	8.03	0.5201	60.94	5.85	0.1129	24.08	0.0068	99.5488	0.278564	0.691948	0.0294887
	Domes	Dome Te	187.03	8.06	0.4813	60.89	6.11	0.1106	24.34	0	100.02	0.287277	0.685778	0.0269449
	Domes	Dome Te	301.51	7.28	0.3659	58.73	7.43	0.1106	25.22	0.0012	99.157	0.353141	0.626152	0.0207073
	Domes	Dome Te	195.26	7.49	0.4305	60.01	6.91	0.1104	25.13	0	100.106	0.329413	0.646151	0.0244364
	Domes	Dome Te	137.8	7.42	0.4132	59.31	7.13	0.1094	24.89	0	99.2971	0.338726	0.6379	0.0233733
	Domes	Dome Te	387.37	7.32	0.3868	58.71	7.38	0.1094	25.23	0	99.1487	0.349978	0.628181	0.021841
	Domes	Dome Te	294.74	6.9	0.3462	58.56	8.15	0.1088	26.28	0.0008	100.381	0.387198	0.593218	0.0195841
	Domes	Dome Te	258.58	8.11	0.4917	60.9	5.78	0.1088	24.04	0	99.4306	0.274695	0.697481	0.0278243
	Domes	Dome Te	530.47	6.04	0.2696	56.08	9.8	0.1087	27.33	0.0109	99.664	0.465532	0.519218	0.0152491
	Domes	Dome Te	86.86	8.14	0.5243	61.39	5.92	0.1067	24.03	0	100.138	0.278265	0.692391	0.0293439
	Domes	Dome Te	232.9	6.84	0.3239	57.99	8.49	0.1056	26.4	0.0018	100.156	0.399463	0.582391	0.018146
	Domes	Dome Te	129.79	7.98	0.5012	61.11	5.93	0.1046	24.33	0.0048	99.9927	0.282817	0.688721	0.0284619
	Domes	Dome Te	341.17	7.8	0.5077	60.13	6.65	0.1035	24.78	0	100.019	0.31119	0.660522	0.0282886
	Domes	Dome Te	461.11	7.63	0.42	59.1	6.98	0.0971	25.1	0.0049	99.3508	0.327891	0.648617	0.0234922
	Domes	Dome Te	329.65	7.4	0.4046	58.9	7.1	0.0888	25.09	0	98.9937	0.33853	0.638499	0.0229703
	Domes	Eastern Dome U9	1	7.36	0.5015	57.96	7.7	0.8485	25.09	0.0272	99.5457	0.356218	0.616158	0.0276246
	Domes	Eastern Dome U9	1	4.9	0.2734	52.93	11.94	0.5627	29	0.0078	99.6687	0.565001	0.419595	0.0154044
	Domes	Eastern Dome U9	1	5.96	0.3466	54.85	10.24	0.539	27.71	0.035	99.7237	0.477655	0.503095	0.0192506
	Domes	Eastern Dome U9	1	6.87	0.4284	57.16	8.2	0.5368	25.77	0.057	99.0782	0.387849	0.588024	0.0241268
	Domes	Eastern Dome U9	13.3	7.21	0.5306	57.82	7.89	0.5262	25.93	0.0197	99.9538	0.365799	0.60491	0.029291
	Domes	Eastern Dome U9	1	5.32	0.3255	54.35	11	0.5252	28.57	0.0371	100.177	0.523441	0.458116	0.0184428
	Domes	Eastern Dome U9	10.48	5.19	0.2825	53.85	11.26	0.51	28.5	0.0485	99.695	0.536488	0.447485	0.0160266
	Domes	Eastern Dome U9	19.96	5	0.2876	53.51	11.68	0.5034	29.08	0.0392	100.177	0.554327	0.42942	0.0162522
	Domes	Eastern Dome U9	50.2	6.32	0.4349	55.64	9.49	0.4901	27.33	0.0072	99.7688	0.442534	0.533319	0.0241474
	Domes	Eastern Dome U9	1	6.89	0.5123	57.65	7.98	0.4848	26.28	0.0038	99.8475	0.378947	0.592086	0.0289669
	Domes	Eastern Dome U9	25.6	7.02	0.4863	57.33	8.36	0.4837	26.48	0.0055	100.212	0.386275	0.586971	0.0267544
	Domes	Eastern Dome U9	62.5	5.72	0.3837	54.63	10.36	0.482	28.13	0.0147	99.7588	0.489419	0.488998	0.0215831
	Domes	Eastern Dome U9	37.9	6.93	0.4999	56.92	8.55	0.478	26.55	0.0245	99.9855	0.394265	0.578288	0.0274477
	Domes	Eastern Dome U9	1	6.49	0.3825	56.54	9.26	0.4743	26.23	0.005	99.4764	0.431502	0.547275	0.0212229
	Domes	Eastern Dome U9	185.1	6.86	0.5409	57.45	8.25	0.4696	26.36	0.0086	99.9892	0.387177	0.582598	0.0302255
	Domes	Eastern Dome U9	59.56	5.71	0.3501	54.66	10.69	0.4686	27.91	0.0461	99.8941	0.498605	0.481952	0.0194434
	Domes	Eastern Dome U9	66.6	7.48	0.6509	58.88	7.3	0.4607	25.74	0.0448	100.621	0.33779	0.626347	0.0358624
	Domes	Eastern Dome U9	20.52	7.3	0.6319	58.04	7.86	0.4295	25.68	0.0195	100.001	0.360176	0.605346	0.0344779
	Domes	Eastern Dome U9	1	6.34	0.3982	56.05	9.35	0.4266	26.88	0.0208	99.5461	0.439025	0.538712	0.0222628
	Domes	Eastern Dome U9	50.2	5.03	0.282	53.27	11.55	0.4237	29.07	0.0283	99.6785	0.550309	0.433693	0.0159983
	Domes	Eastern Dome U9	36.56	4.69	0.2669	52.63	11.83	0.4141	29.94	0.0124	99.8027	0.573299	0.4113	0.0154009
	Domes	Eastern Dome U9	49.8	5.89	0.3844	55.24	10.19	0.4135	27.76	0.0473	99.9722	0.47826	0.500258	0.021482
	Domes	Eastern Dome U9	88.84	5.39	0.3203	54.19	10.89	0.4108	27.63	0.0266	98.8975	0.517948	0.463913	0.0181391
	Domes	Eastern Dome U9	11.98	7.27	0.5937	58.04	7.85	0.4101	25.25	0.0162	99.4734	0.361536	0.605907	0.0325574
	Domes	Eastern Dome U9	55.9	7.46	1.0085	59.08	7.04	0.4084	24.17	0.0617	99.2413	0.323818	0.620949	0.0552337
	Domes	Eastern Dome U9	13.02	5.93	0.2984	54.69	10.34	0.407	27.64	0.0038	99.3147	0.482582	0.500835	0.0165825
	Domes	Eastern Dome U9	1	7.18	0.4274	57.33	8.2	0.4006	25.97	0.0227	99.5631	0.377845	0.598706	0.0234496
	Domes	Eastern Dome U9	37.06	7.12	0.4268	57.07	8.23	0.3981	25.85	0.0249	99.151	0.380618	0.59588	0.0235025
	Domes	Eastern Dome U9	9.89	7.25	0.5793	58.38	7.5	0.3967	25.93	0	100.052	0.351955	0.615676	0.032369
	Domes	Eastern Dome U9	72.12	7.66	0.7046	59.6	6.75	0.3965	25.03	0.023	100.17	0.314675	0.646214	0.0391113
	Domes	Eastern Dome U9	86.32	5.52	0.3441	54.4	10.91	0.3958	28.46	0.0281	100.085	0.511994	0.468779	0.0192276
	Domes	Eastern Dome U9	22.96	6.87	0.5601	57.46	8.39	0.3941	25.41	0.0195	99.1271	0.390431	0.578534	0.0310348
	Domes	Eastern Dome U9	13.18	7.1	0.5807	58.06	7.91	0.3908	25.53	0.0176	99.618	0.368768	0.598997	0.0322351
	Domes	Eastern Dome U9	10.76	7.21	0.5905	58.08	8.06	0.3901	26.12	0.0113	100.517	0.369546	0.598217	0.032237
	Domes	Eastern Dome U9	44.92	7.34	0.6538	58.53	7.63	0.3896	24.94	0.009	99.5032	0.351756	0.612354	0.0358892
	Domes	Eastern Dome U9	30.28	7.23	0.66	58.04	7.85	0.3895	25.75	0.0201	100.002	0.361427	0.602391	0.0361823
	Domes	Eastern Dome U9	25.04	7.16	0.4145	57.13	8.18	0.3881	25.8	0.0229	99.1317	0.37817	0.599013	0.022817
	Domes	Eastern Dome U9	81.01	7.65	0.7332	59.7	6.65	0.3858	25.13	0.0124	100.316	0.311232	0.647909	0.0408589
	Domes	Eastern Dome U9	33.94	7.6	0.7091	58.86	7.12	0.3848	24.5	0.0101	99.2112	0.327846	0.633276	0.0388775
	Domes	Eastern Dome U9	10.94	6.44	0.4483	56.51	9.09	0.384	26.94	0.018	99.853	0.427206	0.547707	0.0250867
	Domes	Eastern Dome U9	95.8	5.43	0.341	54.35	10.81	0.3828	28.38	0.0285	99.7773	0.513727	0.466977	0.0192958
	Domes	Eastern Dome U9	1	7.11	0.5011	57.87	7.97	0.3823	25.4	0.0037	99.2889	0.371855	0.600307	0.0278381
	Domes	Eastern Dome U9	172.45	4.33	0.1827	51.63	12.97	0.3822	30.57	0.0227	100.117	0.616937	0.372716	0.0103476
	Domes	Eastern Dome U9	133.72	6	0.3929	55.38	9.94	0.3805	27.65	0.0236	99.802	0.467422	0.510579	0.0219991
	Domes	Eastern Dome U9	115.8	7.21	0.5831	58.72	7.74	0.38	26.13	0.0371	100.842	0.360307	0.607373	0.0323203
	Domes	Eastern Dome U9	63.23	5.95	0.389	55.79	9.57	0.3796	27.6	0.0086	99.752	0.460086	0.517646	0.0222678
	Domes	Eastern Dome U9	105.28	5.6	0.3515	54.69	10.57	0.379	28.22	0.0439	99.8984	0.500416	0.47977	0.0198145
	Domes	Eastern Dome U9	67.36	5.31	0.3429	54.18	10.92	0.3788	28.46	0.0279	99.6551	0.521554	0.458945	0.0195005
	Domes	Eastern Dome U9	25.36	7.66	0.7177	58.95	7.13	0.3786	24.81	0.0224	99.6774	0.326371	0.634512	0.039117
	Domes	Eastern Dome U9	14.6	6.83	0.5832	57.79	8.33	0.3785	26.27	0.0379	100.268	0.38954	0.577986	0.0324733
	Domes	Eastern Dome U9	124.24	5.85	0.3825	55.28	10.28	0.3774	27.86	0.0273	100.093	0.482136	0.496503	0.0213604
	Domes	Eastern Dome U9	69.32	5.95	0.3911	55.45	10.29	0.377	27.79	0.0033	100.271	0.478094	0.50027	0.0216365
	Domes	Eastern Dome U9	11.97	7.03	0.5917	58.08	7.8	0.3766	25.7	0.0288	99.6337	0.36747	0.599338	0.0331917
	Domes	Eastern Dome U9	40.04	7.12	0.6216	58.02	8.16	0.3746	26.12	0.0124	100.463	0.374575	0.59145	0.0339751
	Domes	Eastern Dome U9	1	6.54	0.4655	56.58	9.01	0.3743	27.01	0.0106	100.024	0.421043	0.553056	0.0259013
	Domes	Eastern Dome U9	38.92	6.58	0.4909	56.67	9.11	0.3727	26.71	0.0269	100.001	0.421723	0.551219	0.0270584
	Domes	Eastern Dome U9	29.44	7.12	0.6218	58.1	8.04	0.3713	25.95	0.0382	100.277	0.371107	0.594719	0.0341739
	Domes	Eastern Dome U9	17.4	5.49	0.3725	54.34	10.9	0.3713	28.67	0.0088	100.166	0.512257	0.466899	0.0208444
	Domes	Eastern Dome U9	197.8	6.94	0.5702	57.84	8.18	0.3701	26.3	0.0218	100.255	0.381926	0.586374	0.0316996
	Domes	Eastern Dome U9	66.88	5.77	0.3625	54.54	10.47	0.3688	27.23	0.0156	98.7783	0.490555	0.489222	0.0202232
	Domes	Eastern Dome U9	132.2	7.18	0.5619	58.23	7.85	0.3649	26.21	0.0214	100.424	0.36491	0.603989	0.0311011
	Domes	Eastern Dome U9	114.76	5.67	0.3713	55.21	10.46	0.3635	28.11	0.0205	100.241	0.494266	0.484843	0.0208908
	Domes	Eastern Dome U9	76.84	5.38	0.3304	54.12	11.12	0.36	28.49	0.0309	99.8911	0.523314	0.458172	0.0185139
	Domes	Eastern Dome U9	83	7.67	0.7009	59.74	6.88	0.36	24.82	0.0092	100.202	0.318601	0.642752	0.038647
	Domes	Eastern Dome U9	230.6	6.77	0.5939	57.76	8.28	0.3591	26.32	0.0094	100.147	0.389861	0.576843	0.0332961
	Domes	Eastern Dome U9	33.8	5.27	0.3342	53.55	11.39	0.3589	29.08	0.0376	100.079	0.534123	0.447216	0.0186606
	Domes	Eastern Dome U9	165	6.72	0.4734	57.07	8.79	0.3585	27	0.0132	100.425	0.408564	0.565236	0.0261999
	Domes	Eastern Dome U9	74.8	7.53	0.7748	58.78	7.17	0.357	25.4	0.0053	100.03	0.330125	0.627398	0.0424766
	Domes	Eastern Dome U9	332.47	6.74	0.4564	57.27	8.66	0.357	26.73	0.0253	100.257	0.404667	0.56994	0.0253937
	Domes	Eastern Dome U9	37.54	7.54	0.7007	59.01	7.12	0.3565	24.83	0.0341	99.6208	0.329646	0.631726	0.0386279
	Domes	Eastern Dome U9	49.08	7.6	0.5932	58.03	7.52	0.3562	24.81	0.007	98.9349	0.342137	0.625727	0.0321355
	Domes	Eastern Dome U9	77.86	5.06	0.2733	53.25	11.67	0.356	28.55	0.011	99.1842	0.551717	0.432898	0.0153846
	Domes	Eastern Dome U9	149.59	5.55	0.2763	54.43	10.93	0.3545	28.66	0.0151	100.262	0.513087	0.471469	0.0154438
	Domes	Eastern Dome U9	22.94	6.54	0.4977	56.85	8.65	0.3538	26.4	0.0221	99.3649	0.410389	0.561496	0.0281156
	Domes	Eastern Dome U9	18.78	5.24	0.3004	53.86	10.9	0.353	28.94	0.0106	99.6052	0.525551	0.457203	0.017246
	Domes	Eastern Dome U9	27.67	4.86	0.2788	53.12	11.53	0.3506	29.58	0.0141	99.7794	0.558171	0.425759	0.0160706
	Domes	Eastern Dome U9	110.8	5.44	0.3249	54	11.04	0.3505	27.7	0.0314	98.9565	0.519011	0.462802	0.0181869
	Domes	Eastern Dome U9	14.15	7.79	0.7108	59.56	6.75	0.35	24.51	0.0186	99.6997	0.311155	0.649831	0.0390141
	Domes	Eastern Dome U9	298.18	7.45	0.5664	58.75	7.57	0.3493	25.65	0.0224	100.374	0.348428	0.62053	0.0310414
	Domes	Eastern Dome U9	45.45	5.16	0.3187	53.68	11.13	0.349	29.09	0.0177	99.7485	0.533886	0.447911	0.0182027
	Domes	Eastern Dome U9	54.34	4.91	0.2821	53.16	11.44	0.3486	29.53	0.03	99.7724	0.553696	0.430047	0.0162573
	Domes	Eastern Dome U9	99.82	5.69	0.3455	54.64	10.46	0.3481	27.51	0.0188	99.1017	0.494138	0.486428	0.0194342
	Domes	Eastern Dome U9	309.61	7.11	0.527	57.89	8.14	0.3479	25.95	0.0256	100.034	0.37626	0.594734	0.0290052
	Domes	Eastern Dome U9	229.6	6.02	0.3597	55.5	10.03	0.3477	27.85	0.0203	100.188	0.46974	0.510202	0.0200585
	Domes	Eastern Dome U9	123.4	7.45	0.6732	59.13	7.48	0.3439	25.31	0.0072	100.4	0.343698	0.619471	0.0368316
	Domes	Eastern Dome U9	99.4	7.37	0.6332	59.25	7.21	0.3433	25.12	0.0014	99.9753	0.338483	0.626122	0.0353952
	Domes	Eastern Dome U9	252.46	5.59	0.2986	54.64	10.82	0.3413	28.52	0.0133	100.261	0.508187	0.475114	0.0166989
	Domes	Eastern Dome U9	161.02	5.41	0.2794	54.03	11.17	0.3389	28.91	0.0075	100.195	0.524591	0.459785	0.0156241
	Domes	Eastern Dome U9	28.2	6.95	0.5807	57.97	8.19	0.3381	26.08	0.0071	100.149	0.38167	0.586108	0.0322223
	Domes	Eastern Dome U9	48.4	6.5	0.4786	56.55	9.17	0.3371	26.82	0.0046	99.8972	0.426463	0.547034	0.0265024
	Domes	Eastern Dome U9	85.6	7.76	0.773	59.94	6.57	0.335	24.75	0.0223	100.174	0.305111	0.652145	0.0427438
	Domes	Eastern Dome U9	138.16	6.08	0.3556	55.43	10.07	0.335	27.85	0.0366	100.178	0.46846	0.511842	0.0196973
	Domes	Eastern Dome U9	61.9	8.14	0.9121	60.74	5.94	0.3347	24.03	0.0228	100.124	0.273023	0.677059	0.0499179
	Domes	Eastern Dome U9	214.2	7.07	0.6162	57.92	8.17	0.334	26.26	0.0209	100.439	0.376536	0.589649	0.0338148
	Domes	Eastern Dome U9	124	7.16	0.6503	58.02	7.94	0.333	25.93	0.021	100.08	0.366384	0.597886	0.0357298
	Domes	Eastern Dome U9	96.2	6.06	0.3823	55.75	9.92	0.3317	27.79	0.007	100.278	0.464821	0.51385	0.0213294
	Domes	Eastern Dome U9	82.6	6.14	0.4008	56.16	9.64	0.3308	27.37	0.0182	100.06	0.45411	0.523409	0.0224808
	Domes	Eastern Dome U9	181.4	7.15	0.5824	57.98	8.05	0.3306	26.08	0.0222	100.27	0.371271	0.596747	0.0319828
	Domes	Eastern Dome U9	195.31	5.28	0.2735	53.9	11.25	0.3294	28.87	0.0172	99.9464	0.532406	0.452182	0.0154116
	Domes	Eastern Dome U9	57.88	5.86	0.4151	55.42	9.97	0.3274	27.61	0.0174	99.6618	0.473214	0.503326	0.0234594
	Domes	Eastern Dome U9	41.8	6.97	0.5809	57.98	8.16	0.3274	26.16	0.0132	100.23	0.380158	0.587619	0.0322237
	Domes	Eastern Dome U9	121.78	5.35	0.293	54.09	11.06	0.3264	28.54	0.0157	99.704	0.52441	0.459048	0.0165418
	Domes	Eastern Dome U9	286.75	7.06	0.5211	58.16	8.01	0.3261	26.02	0.0056	100.108	0.374186	0.596828	0.0289853
	Domes	Eastern Dome U9	241.03	6.71	0.4544	57.12	8.73	0.3256	26.63	0.0197	100.012	0.407684	0.567049	0.0252667
	Domes	Eastern Dome U9	159.34	7.2	0.5704	58.07	8	0.3241	25.43	0.0062	99.6127	0.368519	0.600195	0.0312861
	Domes	Eastern Dome U9	109.8	6.18	0.4297	55.64	9.38	0.3234	26.6	0.0292	98.6102	0.445074	0.530649	0.024277
	Domes	Eastern Dome U9	134.98	6.53	0.4645	56.8	9.16	0.3219	26.46	0.0085	99.7687	0.425454	0.548857	0.0256888
	Domes	Eastern Dome U9	99.4	7.83	0.8406	59.73	6.83	0.3212	25.12	0.0171	100.717	0.310451	0.644055	0.0454948
	Domes	Eastern Dome U9	132.64	7.21	0.638	58.15	7.62	0.3197	25.58	0.0263	99.5569	0.355625	0.608922	0.0354535
	Domes	Eastern Dome U9	206.74	5.51	0.2737	53.99	11.21	0.3195	28.86	0.0002	100.166	0.521227	0.46362	0.0151529
	Domes	Eastern Dome U9	87.1	7.53	0.7677	58.86	7.18	0.3186	25.39	0.0136	100.072	0.330562	0.627354	0.0420844
	Domes	Eastern Dome U9	86.26	6.24	0.4112	56.04	9.65	0.3182	27.03	0.0145	99.7308	0.450268	0.526887	0.0228453
	Domes	Eastern Dome U9	154.58	7.67	0.8062	59.39	6.58	0.3177	24.41	0.0343	99.2327	0.307193	0.647992	0.0448155
	Domes	Eastern Dome U9	111.7	7.85	0.8791	59.7	6.49	0.3175	24.88	0.0179	100.158	0.298496	0.653361	0.048143
	Domes	Eastern Dome U9	183.88	5.09	0.2456	53.33	11.7	0.3164	29.45	0.0333	100.177	0.551797	0.434411	0.0137919
	Domes	Eastern Dome U9	69	6.52	0.4756	57.04	8.86	0.3142	26.81	0.0174	100.061	0.417431	0.555889	0.0266805
	Domes	Eastern Dome U9	263.89	5.63	0.2974	54.41	10.87	0.3139	28.5	0.0177	100.107	0.507652	0.47581	0.0165378
	Domes	Eastern Dome U9	321.04	6.88	0.4778	57.58	8.42	0.3126	26.47	0.0805	100.251	0.392739	0.580724	0.0265362
	Domes	Eastern Dome U9	55.4	7.3	0.6173	58.64	7.69	0.3113	25.75	0.0154	100.371	0.355438	0.610589	0.033973
	Domes	Eastern Dome U9	208.06	7.13	0.5788	58.39	7.89	0.3106	25.03	0.0115	99.341	0.367287	0.600631	0.0320818
	Domes	Eastern Dome U9	171.95	7.57	0.7591	59.59	6.83	0.3092	25.39	0.0202	100.477	0.318671	0.639157	0.0421718
	Domes	Eastern Dome U9	49.72	7.49	0.696	59.22	7.19	0.3046	25.02	0.0031	99.958	0.33329	0.628295	0.0384152
	Domes	Eastern Dome U9	126.73	6.9	0.5009	57.58	8.24	0.3044	26.37	0.0256	99.9314	0.38644	0.585589	0.0279709
	Domes	Eastern Dome U9	275.32	6.8	0.4425	57.04	8.87	0.3034	26.83	0.0207	100.339	0.408711	0.567011	0.0242777
	Domes	Eastern Dome U9	127.88	5.7	0.3231	54.62	10.52	0.3028	27.9	0.0168	99.4044	0.495768	0.486102	0.0181301
	Domes	Eastern Dome U9	76.2	7.71	0.7201	59.26	6.67	0.3017	24.77	0.0079	99.487	0.310526	0.649556	0.0399178
	Domes	Eastern Dome U9	74.08	7.64	0.7014	59.15	7.11	0.3008	24.65	0.0387	99.6029	0.326586	0.635053	0.0383614
	Domes	Eastern Dome U9	195.88	7.61	0.665	58.98	7.2	0.2985	24.77	0	99.5437	0.330836	0.632781	0.0363833
	Domes	Eastern Dome U9	98.44	6.24	0.3727	55.67	10.02	0.2949	27.35	0.028	100.005	0.460566	0.519036	0.0203978
	Domes	Eastern Dome U9	79.08	7.13	0.5567	58.18	7.98	0.2945	25.82	0.0228	100.013	0.370379	0.598856	0.0307656
	Domes	Eastern Dome U9	183.7	7.23	0.5835	58.4	7.92	0.2929	25.38	0.027	99.8736	0.365004	0.602976	0.0320195
	Domes	Eastern Dome U9	173.2	7.2	0.5679	57.85	7.98	0.2887	26.09	0.0043	100.026	0.367988	0.60083	0.0311819
	Domes	Eastern Dome U9	171.52	7.43	0.6543	59.02	7.35	0.2886	24.74	0.0171	99.5244	0.340678	0.623211	0.0361106
	Domes	Eastern Dome U9	121.67	7.76	0.8251	59.8	6.45	0.2874	24.72	0.0152	99.8646	0.300347	0.653905	0.0457479
	Domes	Eastern Dome U9	160.9	7.07	0.5912	57.82	8.08	0.2867	26.33	0	100.199	0.374455	0.592922	0.032623
	Domes	Eastern Dome U9	122.8	7.37	0.687	59.3	7.18	0.2867	24.81	0.0249	99.7037	0.336537	0.625122	0.0383412
	Domes	Eastern Dome U9	99.73	7.31	0.7019	59.16	7.06	0.2835	25.08	0.0244	99.6199	0.334215	0.626221	0.0395637
	Domes	Eastern Dome U9	110.7	7.75	0.7586	59.93	6.54	0.2825	24.74	0.018	100.034	0.304641	0.653284	0.0420751
	Domes	Eastern Dome U9	95	7.93	0.7879	59.92	6.47	0.2817	24.71	0.0181	100.144	0.297355	0.659528	0.0431165
	Domes	Eastern Dome U9	69.95	6.82	0.5031	57.08	8.77	0.2808	26.85	0.0232	100.352	0.403948	0.56846	0.0275919
	Domes	Eastern Dome U9	97.16	7.22	0.6289	58.39	7.58	0.2804	26.25	0.0179	100.385	0.354299	0.610699	0.0350013
	Domes	Eastern Dome U9	104.4	7.83	0.7872	59.76	6.54	0.2793	24.76	0.0116	99.9681	0.302125	0.654575	0.0433006
	Domes	Eastern Dome U9	110.34	7.1	0.5936	58.58	7.77	0.2768	26.11	0	100.456	0.364358	0.602498	0.0331438
	Domes	Eastern Dome U9	61.1	7.54	0.6472	58.58	7.12	0.2763	25.13	0.0121	99.3083	0.330621	0.633595	0.0357841
	Domes	Eastern Dome U9	89.65	6.53	0.4396	56.35	9.26	0.2746	27.09	0.0128	99.9571	0.428698	0.54707	0.0242325
	Domes	Eastern Dome U9	145.65	7.79	0.7906	60.02	6.56	0.274	25.05	0	100.501	0.303727	0.652688	0.043585
	Domes	Eastern Dome U9	148.6	7.09	0.6206	57.81	7.96	0.2731	26.19	0.0066	100.003	0.36973	0.595947	0.034323
	Domes	Eastern Dome U9	137.64	5.86	0.3402	54.87	10.27	0.2718	27.83	0.0051	99.4874	0.482624	0.49834	0.0190359
	Domes	Eastern Dome U9	108.36	6.66	0.4887	56.94	8.8	0.2717	26.64	0.0185	99.8824	0.410562	0.562289	0.0271481
	Domes	Eastern Dome U9	40.4	5.94	0.3572	55.11	10.4	0.2664	27.91	0.0129	100.015	0.48205	0.498236	0.0197139
	Domes	Eastern Dome U9	88.76	6.35	0.4861	56.62	9.01	0.2663	26.69	0.0148	99.4438	0.427421	0.545122	0.0274573
	Domes	Eastern Dome U9	136.3	7.11	0.6335	57.88	8.05	0.2631	26.13	0.0064	100.103	0.371468	0.593724	0.0348075
	Domes	Eastern Dome U9	30.82	6.47	0.493	56.93	8.88	0.2607	27.13	0	100.191	0.419356	0.552922	0.0277216
	Domes	Eastern Dome U9	99.5	7.2	0.5345	57.77	8.02	0.2606	26.28	0.0215	100.121	0.369828	0.600824	0.0293477
	Domes	Eastern Dome U9	93.05	7.83	0.7492	60.05	6.35	0.2606	24.25	0.0039	99.517	0.29657	0.661767	0.0416632
	Domes	Eastern Dome U9	118.12	6.31	0.3947	55.96	9.67	0.2594	27.29	0.0145	99.9174	0.448542	0.529658	0.0217994
	Domes	Eastern Dome U9	85.14	7.4	0.6491	57.98	7.43	0.2592	25.12	0.0023	98.8631	0.344075	0.620134	0.0357913
	Domes	Eastern Dome U9	30.55	5.84	0.3492	55.41	10.28	0.2586	28.17	0.0198	100.384	0.483446	0.497	0.0195537
	Domes	Eastern Dome U9	70.58	6.18	0.4284	56.02	9.55	0.2582	27.37	0.0198	99.8442	0.449547	0.526441	0.0240117
	Domes	Eastern Dome U9	60.1	6.51	0.4416	56.46	9.14	0.2574	26.77	0.0247	99.6557	0.426177	0.549306	0.0245174
	Domes	Eastern Dome U9	66.8	5.82	0.3669	54.75	10.37	0.2558	28.15	0.0015	99.7458	0.485967	0.49356	0.0204728
	Domes	Eastern Dome U9	109.35	7.4	0.5838	58.26	7.62	0.2551	25.53	0.0241	99.6958	0.351049	0.616927	0.0320242
	Domes	Eastern Dome U9	109.18	7.01	0.6209	58.28	7.67	0.2549	26.09	0.0214	99.9936	0.363597	0.601356	0.0350467
	Domes	Eastern Dome U9	79.9	7.26	0.5702	58.9	7.84	0.2539	25.78	0.0203	100.652	0.36201	0.60664	0.0313497
	Domes	Eastern Dome U9	120.28	7.24	0.6004	58.54	7.85	0.2536	25.93	0.0305	100.479	0.362309	0.604696	0.0329952
	Domes	Eastern Dome U9	79.8	5.72	0.3422	54.58	10.51	0.2533	28.16	0.0142	99.6172	0.494157	0.486685	0.0191577
	Domes	Eastern Dome U9	80.52	5.67	0.3569	54.73	10.51	0.2533	28.43	0.0218	99.9935	0.495859	0.484092	0.0200495
	Domes	Eastern Dome U9	132.6	7.75	0.841	59.62	6.47	0.2511	24.72	0.0103	99.691	0.300986	0.652429	0.0465843
	Domes	Eastern Dome U9	77.79	6.04	0.4029	55.78	9.57	0.2506	27.2	0.0022	99.2489	0.456151	0.520982	0.0228663
	Domes	Eastern Dome U9	130.22	6.66	0.5046	57.52	8.55	0.2505	26.66	0.0159	100.174	0.403246	0.568417	0.0283369
	Domes	Eastern Dome U9	123.2	7.96	0.8268	59.66	6.53	0.2485	24.75	0.0084	100.031	0.297914	0.657173	0.0449137
	Domes	Eastern Dome U9	48	6.26	0.4393	55.99	9.38	0.2483	27.31	0.0241	99.6808	0.4418	0.533563	0.0246368
	Domes	Eastern Dome U9	169.28	7.03	0.5709	58.21	7.76	0.2472	26.19	0.0232	100.054	0.366705	0.601172	0.032123
	Domes	Eastern Dome U9	73.12	7.49	0.6108	58.24	7.46	0.2463	25.15	0.02	99.2721	0.343124	0.623424	0.0334513
	Domes	Eastern Dome U9	50.25	5.96	0.3585	55.4	10.14	0.2456	27.6	0.0161	99.7371	0.474892	0.505117	0.0199916
	Domes	Eastern Dome U9	157.26	7.07	0.6027	58.14	7.96	0.2449	26.28	0.0199	100.373	0.370721	0.595857	0.0334222
	Domes	Eastern Dome U9	140.16	5.71	0.3594	54.98	10.37	0.2445	28.34	0.0161	100.029	0.49075	0.488998	0.0202517
	Domes	Eastern Dome U9	121.2	7.1	0.619	58.13	7.76	0.2438	26.2	0.0147	100.102	0.363544	0.601926	0.0345293
	Domes	Eastern Dome U9	100.4	5.73	0.3769	55.45	9.99	0.2431	27.94	0.0138	99.7663	0.480105	0.498327	0.0215674
	Domes	Eastern Dome U9	50.7	6.06	0.4209	55.92	9.81	0.2415	27.65	0	100.121	0.46105	0.515396	0.0235537
	Domes	Eastern Dome U9	40.76	6.23	0.4788	56.57	9.06	0.2401	27.07	0.0097	99.681	0.433408	0.539319	0.0272724
	Domes	Eastern Dome U9	33.91	7.14	0.5818	58.14	7.85	0.2387	25.8	0.0231	99.8013	0.365737	0.601987	0.0322756
	Domes	Eastern Dome U9	98.6	6.91	0.5052	57.61	8.32	0.2368	26.13	0	99.7514	0.388312	0.583613	0.0280751
	Domes	Eastern Dome U9	44.88	6.75	0.5519	57.42	8.19	0.2357	26.23	0.0194	99.457	0.38885	0.57995	0.0312003
	Domes	Eastern Dome U9	10.85	6.58	0.4497	56.12	9.31	0.235	26.75	0.0107	99.4703	0.427991	0.547394	0.0246155
	Domes	Eastern Dome U9	88.84	7.08	0.5187	57.75	8.14	0.2348	26.23	0.0084	99.9833	0.37738	0.593987	0.0286333
	Domes	Eastern Dome U9	132.5	7.74	0.7829	59.98	6.64	0.2336	25.11	0	100.519	0.307711	0.64909	0.0431998
	Domes	Eastern Dome U9	133.22	7.02	0.6089	58.06	7.85	0.2316	26.13	0.0337	99.9785	0.368915	0.597012	0.0340725
	Domes	Eastern Dome U9	53.6	7.04	0.5862	58.12	7.81	0.2313	25.66	0.0176	99.508	0.367568	0.599582	0.0328499
	Domes	Eastern Dome U9	113.8	7.91	0.8281	59.69	6.6	0.2303	24.8	0.0193	100.099	0.301368	0.653609	0.0450232
	Domes	Eastern Dome U9	57.4	6.13	0.3993	55.3	10.05	0.2268	27.8	0.0162	99.9559	0.46488	0.513127	0.0219925
	Domes	Eastern Dome U9	66.75	7.21	0.5749	58.1	7.86	0.2264	25.7	0	99.7391	0.364025	0.604272	0.0317031
	Domes	Eastern Dome U9	106.2	7.56	0.7301	59.55	6.71	0.2261	24.64	0.0226	99.4478	0.315615	0.643495	0.0408901
	Domes	Eastern Dome U9	60.64	6.33	0.4453	56.1	9.45	0.226	27.45	0.013	100.036	0.440864	0.5344	0.0247359
	Domes	Eastern Dome U9	119.35	7.72	0.7423	59.97	6.58	0.2233	25.26	0.0095	100.544	0.306986	0.651778	0.0412357
	Domes	Eastern Dome U9	90.46	5.7	0.3714	55.1	10.29	0.2232	28.23	0.0163	99.9754	0.488903	0.490085	0.0210112
	Domes	Eastern Dome U9	145.24	6.96	0.6052	58.14	7.81	0.2229	26.25	0.0172	100.052	0.369693	0.596196	0.0341107
	Domes	Eastern Dome U9	20.88	6.67	0.5428	57.53	8.45	0.2214	26.43	0.0308	99.8952	0.399215	0.57025	0.0305345
	Domes	Eastern Dome U9	27.3	7.18	0.5963	58.53	7.69	0.2196	25.47	0.0089	99.7472	0.359461	0.60735	0.0331888
	Domes	Eastern Dome U9	20.7	6.39	0.4238	56.3	9.42	0.2171	27.21	0.0118	100.007	0.438381	0.538135	0.0234835
	Domes	Eastern Dome U9	158.8	7.06	0.5649	58.11	8.12	0.2154	26.43	0	100.5	0.376473	0.592341	0.0311853
	Domes	Eastern Dome U9	55.85	6.49	0.4878	56.89	8.73	0.2045	26.75	0.0179	99.5859	0.414622	0.557792	0.0275855
	Domes	Eastern Dome U9	1	6.68	0.4938	56.63	9	0.2011	26.53	0.0038	99.5538	0.4152	0.557675	0.0271248
	Domes	Eastern Dome U9	66.82	6.4	0.4468	56.21	9.15	0.1994	27.17	0.0142	99.6436	0.430312	0.544668	0.0250194
	Old Nevado	Lava U18	1	5.7	0.2893	55.26	10.36	0.4467	28.09	0.0275	100.215	0.492879	0.490733	0.0163882
	Old Nevado	Lava U18	22.25	5.74	0.2176	55.55	10.26	0.3997	27.83	0.0297	100.069	0.49076	0.496847	0.0123931
	Old Nevado	Lava U18	1	6.22	0.2958	55.75	9.65	0.3928	26.62	0.0316	98.9858	0.453945	0.529487	0.0165682
	Old Nevado	Lava U18	86	5.95	0.2367	56.03	9.89	0.3526	27.54	0.0227	100.066	0.472322	0.514219	0.0134599
	Old Nevado	Lava U18	128.5	5.69	0.2099	55.54	10.31	0.3478	27.89	0.0268	100.042	0.494325	0.493692	0.0119831
	Old Nevado	Lava U18	54.61	5.53	0.2081	55	10.49	0.338	27.01	0.0379	98.6248	0.505663	0.482392	0.0119443
	Old Nevado	Lava U18	277.25	5.75	0.2208	55.69	10.14	0.3294	27.83	0.0143	100.01	0.487306	0.500059	0.0126347
	Old Nevado	Lava U18	251.18	6.03	0.2247	56.62	9.6	0.3267	27.18	0.0177	100.055	0.461991	0.525133	0.0128756
	Old Nevado	Lava U18	36.74	5.69	0.2087	55.24	10.34	0.3261	26.8	0.0016	98.6278	0.495086	0.493016	0.0118982
	Old Nevado	Lava U18	43.5	5.65	0.2188	55.59	10.4	0.323	27.9	0.0223	100.146	0.497967	0.489559	0.0124743
	Old Nevado	Lava U18	179.7	5.92	0.2192	56.15	9.82	0.3196	27.32	0.0177	99.8027	0.472252	0.515197	0.0125517
	Old Nevado	Lava U18	107.25	5.85	0.2162	55.46	10.32	0.3172	27.81	0.0266	100.042	0.487626	0.50021	0.0121637
	Old Nevado	Lava U18	197.57	5.77	0.2024	55.63	10.19	0.3156	27.62	0.023	99.7511	0.488201	0.500253	0.0115461
	Old Nevado	Lava U18	108.22	5.93	0.2081	55.85	10.05	0.3152	26.74	0.0294	99.1541	0.477914	0.510303	0.011783
	Old Nevado	Lava U18	149.75	5.9	0.2457	55.98	10.09	0.3125	27.67	0.018	100.268	0.479122	0.506986	0.0138919
	Old Nevado	Lava U18	298.5	5.94	0.2294	56.12	9.84	0.311	27.43	0.0126	99.9109	0.471663	0.515244	0.0130928
	Old Nevado	Lava U18	234.75	5.85	0.2212	55.54	10.24	0.3107	27.73	0.0314	99.9792	0.485545	0.501966	0.0124887
	Old Nevado	Lava U18	143.96	5.83	0.2036	55.69	10.14	0.3096	26.73	0.0144	98.9415	0.484413	0.504006	0.0115813
	Old Nevado	Lava U18	171	5.64	0.2149	55.34	10.44	0.3071	27.96	0.0171	99.9518	0.499469	0.488289	0.0122418
	Old Nevado	Lava U18	126.09	5.97	0.2071	56.04	10.08	0.3054	26.99	0.0288	99.628	0.477045	0.511284	0.0116702
	Old Nevado	Lava U18	161.83	5.84	0.2032	55.87	10.13	0.304	27.76	0.0181	100.169	0.483759	0.504687	0.0115543
	Old Nevado	Lava U18	233.31	5.87	0.2149	56.25	9.85	0.3036	27.53	0.019	100.074	0.475194	0.512462	0.0123444
	Old Nevado	Lava U18	215.44	5.85	0.2069	56.06	10	0.2917	27.38	0.0073	99.8091	0.480015	0.508159	0.0118254
	Old Nevado	Lava U18	41.72	6.57	0.2984	57.61	8.71	0.2909	26.2	0.0178	99.6972	0.415661	0.567383	0.0169559
	Old Nevado	Lava U18	64.75	5.85	0.2109	55.7	10.22	0.2906	27.7	0.0306	100.03	0.485339	0.502735	0.0119254
	Old Nevado	Lava U18	213.5	5.71	0.1967	55.52	10.44	0.2831	28.03	0.0198	100.201	0.496973	0.491878	0.011149
	Old Nevado	Lava U18	90.35	5.5	0.1949	55.22	10.35	0.2799	26.91	0.026	98.5384	0.504017	0.484682	0.011301
	Old Nevado	Lava U18	256	5.47	0.2102	55.48	10.45	0.2751	28.1	0.0204	100.025	0.507307	0.480542	0.0121503
	Old Nevado	Lava U18	192.25	6.04	0.2131	55.88	9.83	0.2714	27.53	0.0299	99.8445	0.467786	0.520139	0.0120747
	Old Nevado	Lava U18	72.48	5.71	0.2042	55.46	10.19	0.2688	26.63	0.0441	98.5439	0.490703	0.497588	0.0117085
	Old Nevado	Lava U18	25.7	6.42	0.2629	56.73	9.16	0.2446	26.43	0.0337	99.2884	0.434312	0.550846	0.0148422
	Old Nevado	Lava U18	38.05	6.53	0.2748	56.9	9.06	0.2396	26.34	0.0225	99.4319	0.427276	0.557292	0.0154312
	Old Nevado	Lava U18	18.29	7.04	0.3259	58.19	8.15	0.2357	25.67	0.0111	99.6338	0.383028	0.598735	0.0182372
	Old Nevado	Lava U18	1	7.54	0.3596	59.36	7.05	0.2338	24.69	0.0125	99.2667	0.333763	0.645966	0.0202707
	Old Nevado	Lava U18	29.84	6.44	0.2876	56.01	9.23	0.2223	27.21	0.0112	99.4198	0.434835	0.549032	0.0161329
	Old Nevado	Lava U18	235.65	7.85	0.4583	60.29	6.45	0.2215	24.21	0.0031	99.4941	0.304227	0.670034	0.0257388
	Old Nevado	Lava U18	1	7.06	0.3482	57.81	8.03	0.2192	25.99	0.0081	99.4845	0.378406	0.602056	0.0195377
	Old Nevado	Lava U18	21.36	6.92	0.3112	57.78	8.24	0.2167	25.84	0.0156	99.3235	0.389908	0.592558	0.0175338
	Old Nevado	Lava U18	13.35	6.8	0.317	57.96	8.35	0.2156	26.08	0.013	99.7372	0.396997	0.585058	0.0179457
	Old Nevado	Lava U18	44.26	7.72	0.4605	59.54	6.78	0.2115	24.87	0.0009	99.6088	0.31833	0.655926	0.0257442
	Old Nevado	Lava U18	123.16	7.63	0.4167	60.04	6.83	0.2112	24.87	0.0035	100.041	0.323182	0.653341	0.0234774
	Old Nevado	Lava U18	145.88	7.21	0.4314	58.67	7.59	0.2103	24.6	0.0061	98.7367	0.358847	0.616868	0.0242856
	Old Nevado	Lava U18	155.45	7.43	0.4314	59.44	6.89	0.2076	24.57	0.0129	98.9897	0.330468	0.644894	0.0246372
	Old Nevado	Lava U18	1	6.83	0.3207	57.93	8.32	0.2066	25.92	0.0037	99.5379	0.395031	0.586838	0.0181304
	Old Nevado	Lava U18	198.6	7.8	0.4516	60.17	6.63	0.205	24.2	0.0224	99.4816	0.311519	0.663216	0.0252654
	Old Nevado	Lava U18	223.3	7.85	0.4565	60.26	6.47	0.2034	24.03	0	99.2709	0.304914	0.66947	0.0256162
	Old Nevado	Lava U18	1	7.05	0.3383	58.68	7.76	0.2032	25.91	0.0158	99.9605	0.370925	0.609821	0.0192543
	Old Nevado	Lava U18	1	6.95	0.34	58.22	8.13	0.2005	26.1	0	99.965	0.385094	0.59573	0.0191759
	Old Nevado	Lava U18	62.08	7.91	0.4408	60.57	6.11	0.1996	23.83	0.0151	99.1179	0.291661	0.683285	0.0250541
	Old Nevado	Lava U18	35.14	7.48	0.356	59.29	6.97	0.1992	25.11	0	99.4263	0.333016	0.646731	0.0202527
	Old Nevado	Lava U18	1	7.16	0.3771	59.18	7.49	0.1985	24.54	0.0125	98.9601	0.358443	0.620069	0.021488
	Old Nevado	Lava U18	124.5	7.8	0.4399	60.29	6.44	0.1976	24.34	0.0168	99.5325	0.305519	0.669632	0.0248489
	Old Nevado	Lava U18	52.21	7.32	0.3787	59.32	7.21	0.1957	25.37	0.0227	99.839	0.344854	0.633579	0.0215673
	Old Nevado	Lava U18	37.22	7.42	0.4151	59.72	7.11	0.193	24.5	0	99.3632	0.338061	0.638438	0.0235006
	Old Nevado	Lava U18	70.16	7.88	0.4464	60.36	6.32	0.1913	24.13	0.0035	99.3511	0.299364	0.675458	0.0251772
	Old Nevado	Lava U18	210.95	7.7	0.4512	60.17	6.68	0.1909	24.03	0.0087	99.2394	0.315819	0.658781	0.0253999
	Old Nevado	Lava U18	245.32	7.65	0.4154	59.93	6.55	0.1908	24.67	0.0099	99.4294	0.313573	0.662748	0.0236791
	Old Nevado	Lava U18	200.21	7.74	0.5254	60.17	6.36	0.1905	23.9	0.023	98.9269	0.302971	0.667228	0.0298013
	Old Nevado	Lava U18	225.77	7.82	0.4507	60.49	6.49	0.1901	24.75	0.0112	100.226	0.306451	0.668209	0.0253399
	Old Nevado	Lava U18	186.34	7.56	0.4531	59.77	6.73	0.1883	24.63	0.0134	99.3549	0.321237	0.653012	0.0257516
	Old Nevado	Lava U18	102.8	7.9	0.429	60.64	6.36	0.1875	24.54	0	100.076	0.30047	0.675398	0.0241325
	Old Nevado	Lava U18	340.79	6.38	0.3482	57.34	8.83	0.1874	26.01	0.0162	99.1526	0.424723	0.555335	0.0199423
	Old Nevado	Lava U18	186.25	7.76	0.454	60.16	6.51	0.1868	24.32	0	99.3959	0.308629	0.665743	0.0256279
	Old Nevado	Lava U18	143.52	7.57	0.3943	59.76	6.98	0.1868	25.07	0.0062	100.001	0.330049	0.647751	0.0221999
	Old Nevado	Lava U18	28.98	7.24	0.3576	59.11	7.38	0.1853	25.51	0.0279	99.8392	0.352983	0.626651	0.0203656
	Old Nevado	Lava U18	265.68	7.63	0.3888	59.88	6.91	0.1853	24.84	0	99.8502	0.326245	0.651898	0.0218571
	Old Nevado	Lava U18	82.44	7.9	0.4343	60.54	6.36	0.1839	24.52	0.0247	99.9822	0.30038	0.675197	0.0244233
	Old Nevado	Lava U18	112.15	7.83	0.4668	60.46	6.38	0.1836	23.96	0.0012	99.3327	0.302295	0.671369	0.0263355
	Old Nevado	Lava U18	136.85	8.06	0.4791	60.5	6.34	0.1836	23.93	0.0078	99.5452	0.294938	0.678524	0.026538
	Old Nevado	Lava U18	163.88	7.55	0.3934	59.94	6.87	0.1826	24.95	0.0078	99.905	0.327126	0.65057	0.0223045
	Old Nevado	Lava U18	204.6	7.43	0.3788	59.49	7.05	0.1821	25.15	0	99.723	0.336571	0.641897	0.0215327
	Old Nevado	Lava U18	156.61	7.53	0.8596	60.55	6.03	0.1812	23.68	0	98.8708	0.291586	0.658921	0.0494933
	Old Nevado	Lava U18	173.9	7.83	0.449	60.26	6.55	0.1812	24.4	0	99.6834	0.308177	0.666669	0.025154
	Old Nevado	Lava U18	184.24	7.57	0.4127	60.24	6.73	0.1809	24.74	0.0065	99.9304	0.321697	0.654813	0.0234892
	Old Nevado	Lava U18	91.55	7.74	0.5175	60.31	6.56	0.1809	23.67	0.0099	99.0003	0.309687	0.661224	0.0290891
	Old Nevado	Lava U18	50.4	7.83	0.4462	60.35	6.43	0.1806	24.46	0	99.7119	0.304297	0.67056	0.025143
	Old Nevado	Lava U18	161.55	7.79	0.4387	60.25	6.51	0.1806	24.46	0.0028	99.6379	0.308102	0.667176	0.0247219
	Old Nevado	Lava U18	171.7	7.8	0.4522	60.75	6.32	0.18	24.49	0	100.011	0.301332	0.672996	0.025672
	Old Nevado	Lava U18	35.58	7.79	0.4083	60.34	6.57	0.1795	24.23	0.0065	99.5509	0.310592	0.666425	0.0229829
	Old Nevado	Lava U18	149.2	7.78	0.4444	60.32	6.66	0.1794	24.33	0	99.7214	0.313146	0.661974	0.0248798
	Old Nevado	Lava U18	224.96	7.73	0.4162	60.25	6.49	0.1794	24.56	0.005	99.6335	0.309431	0.666941	0.0236277
	Old Nevado	Lava U18	308.78	8.02	0.5154	60.84	6.08	0.1791	24.41	0	100.06	0.286699	0.684363	0.028938
	Old Nevado	Lava U18	127.77	7.2	0.4241	58.42	7.73	0.1783	24.62	0	98.593	0.36352	0.612732	0.0237475
	Old Nevado	Lava U18	252.82	7.87	0.5167	60.67	6.01	0.1779	24.22	0.0011	99.4914	0.288015	0.682502	0.0294835
	Old Nevado	Lava U18	93.67	7.83	0.4744	60.69	6.18	0.1777	24.12	0.0025	99.4992	0.295492	0.677499	0.0270087
	Old Nevado	Lava U18	476.66	7.55	0.4767	59.67	7	0.1774	25.11	0.0105	100.035	0.329718	0.643547	0.0267356
	Old Nevado	Lava U18	402.57	6.39	0.33	56.92	9.08	0.1773	26.12	0	99.0174	0.431632	0.54969	0.0186785
	Old Nevado	Lava U18	31.89	7.8	0.4626	60.89	6.28	0.1771	23.78	0.0071	99.4065	0.29982	0.673883	0.0262971
	Old Nevado	Lava U18	73.44	6.75	0.3513	57.59	8.54	0.1767	25.61	0.0135	99.0443	0.403339	0.576906	0.0197556
	Old Nevado	Lava U18	55.33	6.94	0.3753	57.93	8.15	0.1765	26.19	0.0127	99.8117	0.385239	0.593638	0.0211228
	Old Nevado	Lava U18	62.75	7.92	0.4577	60.41	6.52	0.1762	24.19	0.0016	99.708	0.304712	0.669818	0.0254697
	Old Nevado	Lava U18	532.62	7.82	0.539	60.66	6.2	0.1756	24.48	0.007	99.8816	0.295336	0.674093	0.0305713
	Old Nevado	Lava U18	448.68	7.72	0.49	59.94	6.69	0.1755	25.06	0.002	100.077	0.314916	0.65762	0.0274641
	Old Nevado	Lava U18	504.64	8.03	0.5236	60.85	6.26	0.1753	24.61	0.0038	100.466	0.292322	0.678565	0.029113
	Old Nevado	Lava U18	392.72	7.77	0.4838	60.28	6.5	0.1735	24.8	0	100.014	0.30752	0.665227	0.0272537
	Old Nevado	Lava U18	87.52	7.97	0.5782	60.2	5.95	0.1729	24.01	0.0079	98.9016	0.28251	0.684801	0.0326886
	Old Nevado	Lava U18	58.68	7.79	0.4708	59.48	6.79	0.1725	24.82	0.0012	99.5305	0.316586	0.657277	0.0261372
	Old Nevado	Lava U18	217.23	7.26	0.4076	59.14	7.38	0.1721	25.15	0	99.5396	0.351375	0.625518	0.0231073
	Old Nevado	Lava U18	286.04	7.62	0.379	59.39	6.93	0.172	24.9	0.0294	99.4513	0.32734	0.651344	0.021316
	Old Nevado	Lava U18	52.87	7.71	0.4215	60.38	6.63	0.1717	24.3	0.0148	99.6378	0.314455	0.661742	0.0238036
	Old Nevado	Lava U18	243.06	7.85	0.4523	60.57	6.48	0.1717	24.83	0	100.385	0.305313	0.669313	0.0253745
	Old Nevado	Lava U18	202.88	7.88	0.6047	60.2	6.18	0.1711	24.58	0	99.6236	0.292062	0.673911	0.0340273
	Old Nevado	Lava U18	18.07	7.49	0.3723	59.33	7.16	0.1711	25.3	0.0162	99.8512	0.338416	0.640632	0.0209523
	Old Nevado	Lava U18	87.45	7.24	0.3556	59.09	7.56	0.1701	25.31	0.0174	99.7878	0.358547	0.621372	0.0200811
	Old Nevado	Lava U18	137.56	8.11	0.4927	61.53	5.85	0.1687	24.01	0	100.202	0.277084	0.695129	0.0277868
	Old Nevado	Lava U18	112.92	7.93	0.4506	60.89	6.05	0.1686	24.22	0.0017	99.7356	0.288964	0.68541	0.025626
	Old Nevado	Lava U18	99.8	7.28	0.372	58.82	7.58	0.1684	24.98	0.0009	99.2511	0.357597	0.621506	0.0208963
	Old Nevado	Lava U18	191.19	7.74	0.4492	60.55	6.51	0.1676	24.64	0.0006	100.057	0.309243	0.665349	0.0254074
	Old Nevado	Lava U18	84.94	8.45	0.5389	61.96	5.14	0.1667	23.49	0	99.7563	0.243914	0.725637	0.0304497
	Old Nevado	Lava U18	109.66	7.25	0.4537	59.22	7.4	0.1665	24.69	0.0068	99.1909	0.351377	0.622972	0.0256514
	Old Nevado	Lava U18	62.78	8.12	0.4912	61.45	5.76	0.1652	23.4	0.0069	99.3934	0.273777	0.698424	0.0277993
	Old Nevado	Lava U18	248.12	7.13	0.4098	59.11	7.33	0.1652	25.04	0	99.2292	0.353754	0.622697	0.0235489
	Old Nevado	Lava U18	104.74	7.94	0.4658	60.72	6.07	0.1646	23.78	0.006	99.1694	0.289143	0.684437	0.0264195
	Old Nevado	Lava U18	173.9	7.93	0.4558	60.85	6.29	0.1637	24.47	0.0141	100.233	0.296935	0.677444	0.0256204
	Old Nevado	Lava U18	464.35	8.09	0.5424	61.3	5.65	0.1628	23.39	0	99.1424	0.269874	0.699278	0.0308484
	Old Nevado	Lava U18	159.62	8.02	0.5938	60.36	6.13	0.1628	24.26	0.0033	99.5418	0.287116	0.679768	0.033116
	Old Nevado	Lava U18	224.84	7.65	0.4364	60.17	6.41	0.1626	24.7	0.013	99.542	0.30857	0.666417	0.0250139
	Old Nevado	Lava U18	279.01	6.59	0.3096	57.43	8.82	0.162	26.32	0.0118	99.6493	0.417731	0.56481	0.0174594
	Old Nevado	Lava U18	336.76	7.9	0.4873	60.51	6.3	0.162	24.69	0.0228	100.079	0.297503	0.675098	0.0273998
	Old Nevado	Lava U18	280.8	8.31	0.571	61.72	5.4	0.1617	23.57	0.0168	99.7799	0.255707	0.712098	0.0321949
	Old Nevado	Lava U18	239.98	7.79	0.4503	60.51	6.62	0.1616	24.69	0.0147	100.255	0.311483	0.663289	0.0252278
	Old Nevado	Lava U18	122.03	7.95	0.4634	60.73	6.18	0.1607	24.24	0	99.7479	0.292637	0.681235	0.0261275
	Old Nevado	Lava U18	140.9	8.08	0.4826	61.46	5.62	0.1604	23.79	0	99.5931	0.269979	0.702416	0.0276046
	Old Nevado	Lava U18	495.24	8.08	0.5716	61.08	5.78	0.1596	23.94	0.0163	99.6451	0.274162	0.693555	0.0322829
	Old Nevado	Lava U18	364.74	7.75	0.4978	60.48	6.42	0.159	24.68	0	100.001	0.305172	0.666653	0.0281751
	Old Nevado	Lava U18	433.46	6.2	0.2614	55.97	9.71	0.1583	27.18	0.0137	99.5238	0.457136	0.528211	0.0146532
	Old Nevado	Lava U18	196.86	7.68	0.4403	60.12	6.56	0.1582	24.58	0.0109	99.5517	0.312646	0.662368	0.0249861
	Old Nevado	Lava U18	168.88	7.62	0.4093	59.99	6.68	0.1578	24.99	0	99.8829	0.318752	0.657993	0.0232552
	Old Nevado	Lava U18	56.96	7.61	0.3813	60.18	6.66	0.1575	24.8	0	99.8108	0.318885	0.659377	0.0217384
	Old Nevado	Lava U18	19.11	7.81	0.4351	60.42	6.45	0.1572	24.09	0.0005	99.4001	0.305669	0.669779	0.0245517
	Old Nevado	Lava U18	188.46	7.88	0.6075	60.17	6.29	0.1571	24.51	0.0307	99.6644	0.295677	0.67032	0.0340028
	Old Nevado	Lava U18	69.28	7.15	0.3615	58.9	7.69	0.1568	25.69	0.0012	99.958	0.36516	0.614401	0.0204393
	Old Nevado	Lava U18	526.13	8.24	0.554	61.63	5.49	0.1567	23.34	0.0006	99.4402	0.260672	0.708008	0.0313207
	Old Nevado	Lava U18	222.91	7.85	0.4399	60.72	6.52	0.1566	24.59	0.0024	100.301	0.306833	0.668518	0.0246495
	Old Nevado	Lava U18	124.56	7.49	0.4233	59.91	6.85	0.1555	24.57	0	99.4049	0.327624	0.64827	0.0241065
	Old Nevado	Lava U18	87.45	7.8	0.4437	60.33	6.55	0.1551	24.47	0	99.7671	0.309058	0.666014	0.0249281
	Old Nevado	Lava U18	103.42	8.25	0.4936	61.61	5.59	0.155	23.69	0.0061	99.8152	0.264839	0.707316	0.0278449
	Old Nevado	Lava U18	205.84	7.85	0.4613	60.57	6.44	0.1546	24.55	0.0216	100.063	0.303847	0.670237	0.0259152
	Old Nevado	Lava U18	145.2	8	0.5957	60.62	6.08	0.1525	24.25	0.017	99.7672	0.285898	0.680749	0.0333531
	Old Nevado	Lava U18	120.49	7.01	0.3411	58.67	7.77	0.1521	25.67	0	99.6599	0.372454	0.608077	0.0194686
	Old Nevado	Lava U18	371.68	6.53	0.3343	57.5	8.93	0.1518	26.19	0	99.6381	0.422324	0.558851	0.0188248
	Old Nevado	Lava U18	208.48	7.86	0.4401	60.66	6.48	0.1515	24.73	0	100.344	0.305262	0.670053	0.0246859
	Old Nevado	Lava U18	116.36	7.94	0.5858	60.41	5.88	0.1509	24.2	0.0168	99.1872	0.280722	0.685977	0.0333005
	Old Nevado	Lava U18	154.63	7.98	0.467	60.71	6.33	0.1509	24.5	0	100.145	0.296808	0.677119	0.026073
	Old Nevado	Lava U18	73.1	8.03	0.5533	60.31	5.9	0.1498	24.14	0.0092	99.1207	0.279752	0.68901	0.0312379
	Old Nevado	Lava U18	587.91	6.48	0.2938	56.95	9.22	0.1494	26.52	0.0064	99.635	0.432941	0.550632	0.0164267
	Old Nevado	Lava U18	86.35	7.2	0.3522	59.12	7.48	0.1494	25.52	0.011	99.8354	0.357404	0.622558	0.0200377
	Old Nevado	Lava U18	139.32	8.06	0.4646	60.9	6.11	0.1483	23.71	0	99.403	0.287546	0.68642	0.0260343
	Old Nevado	Lava U18	130.78	8.09	0.5977	60.54	5.92	0.1463	23.89	0.0113	99.2125	0.278306	0.688237	0.0334568
	Old Nevado	Lava U18	557.02	6.38	0.2923	57.06	9.1	0.1439	26.61	0.0077	99.6133	0.433468	0.549953	0.0165785
	Old Nevado	Lava U18	75.1	7.73	0.4257	60.16	6.81	0.1436	24.97	0.0228	100.288	0.319639	0.65657	0.0237912
	Old Nevado	Lava U18	101.94	8.17	0.5643	59.86	5.92	0.1388	24.04	0.0045	98.7125	0.276939	0.691629	0.0314321
	Old Nevado	Lava U18	420.7	7.49	0.4462	59.59	6.9	0.1352	25.13	0.0063	99.7549	0.3288	0.645883	0.0253171
	Old Nevado	Lava U18	188.77	7.89	0.4444	60.62	6.41	0.1345	24.47	0.0122	99.9967	0.302115	0.672946	0.0249396
	Old Nevado	Lava U18	174.04	7.88	0.5974	60.44	6.18	0.1328	24.52	0.0017	99.764	0.292182	0.674187	0.0336303
	Old Nevado	Lava U18	309.9	6.63	0.3324	57.46	8.7	0.1326	26.07	0.0012	99.3262	0.412447	0.56879	0.0187634
	Recent Nevado	Ombligo	22.98	5.92	0.1999	56.58	9.69	0.3952	28.11	0.0208	100.953	0.469454	0.519015	0.0115314
	Recent Nevado	Ombligo	1	7.24	0.3539	59.6	6.87	0.3746	25.75	0	100.211	0.336879	0.642458	0.0206632
	Recent Nevado	Ombligo	25.74	5.71	0.1843	55.74	9.91	0.3403	28.44	0.0112	100.34	0.484302	0.504973	0.0107243
	Recent Nevado	Ombligo	11.99	5.82	0.2126	56.63	9.5	0.3363	28.22	0.0199	100.781	0.468322	0.519199	0.0124792
	Recent Nevado	Ombligo	44.96	6.2	0.2197	56.8	9.4	0.3314	27.94	0.0098	100.907	0.450164	0.537308	0.0125278
	Recent Nevado	Ombligo	33.97	5.82	0.1975	56.53	9.8	0.3145	28.41	0.0164	101.109	0.476487	0.512079	0.0114339
	Recent Nevado	Ombligo	55.95	5.91	0.2312	57.03	9.69	0.3095	28.17	0	101.348	0.469018	0.517657	0.0133246
	Recent Nevado	Ombligo	149.82	5.87	0.2132	56.8	9.63	0.3033	28.1	0.0152	100.957	0.46961	0.51801	0.0123794
	Recent Nevado	Ombligo	7.68	6.6	0.2995	58.92	8.31	0.2997	26.59	0.0067	101.044	0.403199	0.579498	0.0173028
	Recent Nevado	Ombligo	1	7.42	0.3904	60.58	6.96	0.291	25.3	0.0011	100.959	0.333776	0.643931	0.0222924
	Recent Nevado	Ombligo	27.72	6.6	0.2635	58.24	8.52	0.2897	26.2	0.0174	100.168	0.410063	0.574836	0.0151005
	Recent Nevado	Ombligo	88.92	6.25	0.2305	57.3	8.93	0.2848	27.91	0.022	100.976	0.435299	0.551322	0.0133785
	Recent Nevado	Ombligo	38.11	5.66	0.1859	55.92	9.77	0.2823	28.66	0.0031	100.523	0.482854	0.506206	0.0109396
	Recent Nevado	Ombligo	14.36	6.82	0.3125	59.27	7.91	0.2816	26.57	0.0202	101.213	0.383538	0.59842	0.0180419
	Recent Nevado	Ombligo	66.94	6.05	0.2174	57.19	9.34	0.2808	27.66	0.0133	100.768	0.454565	0.532836	0.0125982
	Recent Nevado	Ombligo	34.4	5.76	0.2007	56.59	9.92	0.2794	27.45	0.0195	100.253	0.481965	0.506425	0.0116105
	Recent Nevado	Ombligo	248.56	6.02	0.2179	56.89	9.27	0.2724	27.39	0.0103	100.113	0.453891	0.533405	0.0127037
	Recent Nevado	Ombligo	61.12	5	0.1414	54.53	11.41	0.2708	29.02	0.0199	100.459	0.553172	0.438666	0.00816253
	Recent Nevado	Ombligo	192.34	5.84	0.207	56.95	9.59	0.2706	28.04	0.0141	100.937	0.46999	0.517931	0.0120793
	Recent Nevado	Ombligo	77.93	6.34	0.2484	57.99	8.34	0.2686	27.38	0.0238	100.621	0.414744	0.570548	0.0147084
	Recent Nevado	Ombligo	54.44	5.18	0.1645	55.05	11.06	0.2684	28.33	0.0249	100.107	0.536119	0.454386	0.00949452
	Recent Nevado	Ombligo	117.93	4.66	0.128	54.05	11.76	0.2683	30.03	0.0235	101.006	0.578021	0.414488	0.00749113
	Recent Nevado	Ombligo	99.91	6.31	0.224	57.5	8.81	0.2655	27.98	0.0002	101.119	0.429851	0.557135	0.0130134
	Recent Nevado	Ombligo	42.26	6.06	0.2025	56.74	9.64	0.2651	27.86	0.0107	100.822	0.462406	0.526028	0.0115657
	Recent Nevado	Ombligo	21.04	7.25	0.3651	60.42	6.95	0.2644	24.81	0.0334	100.109	0.33895	0.639849	0.0212013
	Recent Nevado	Ombligo	50.48	6.14	0.2346	57.18	8.8	0.2641	27.86	0.0167	100.517	0.43585	0.550315	0.0138351
	Recent Nevado	Ombligo	1	6.26	0.2648	58.03	8.56	0.2641	27.34	0.0104	100.754	0.423688	0.560706	0.015606
	Recent Nevado	Ombligo	227.93	5.86	0.2009	56.55	9.63	0.2639	27.57	0	100.12	0.470361	0.517955	0.0116839
	Recent Nevado	Ombligo	132.88	6.89	0.2597	58.46	8	0.263	27.14	0.0096	101.037	0.385031	0.600087	0.0148826
	Recent Nevado	Ombligo	13.37	5.93	0.2064	56.57	9.09	0.2611	28.08	0	100.186	0.452986	0.534767	0.012247
	Recent Nevado	Ombligo	47.76	5.5	0.1711	55.57	10.62	0.2595	28.55	0.0269	100.764	0.51115	0.479044	0.00980561
	Recent Nevado	Ombligo	289.82	6.12	0.2181	56.99	9.18	0.2593	27.08	0.022	99.8711	0.447486	0.539855	0.0126588
	Recent Nevado	Ombligo	269.19	6.14	0.2191	57.2	9.14	0.259	27.06	0.0115	100.046	0.445593	0.541689	0.0127185
	Recent Nevado	Ombligo	41.08	5.79	0.2012	56.32	10.04	0.2583	27.34	0.0269	99.9942	0.483685	0.504774	0.0115414
	Recent Nevado	Ombligo	86.04	5.78	0.1942	56.91	9.71	0.2543	28.41	0.002	101.293	0.47596	0.512706	0.0113345
	Recent Nevado	Ombligo	160.45	4.94	0.1499	54.56	11.25	0.2542	29.41	0.0155	100.624	0.552336	0.438901	0.00876301
	Recent Nevado	Ombligo	107.3	5.88	0.2144	56.8	9.82	0.2519	28.37	0.0112	101.374	0.474032	0.513645	0.0123232
	Recent Nevado	Ombligo	43.52	6.33	0.2298	58.17	8.68	0.2511	27.13	0.0045	100.795	0.425312	0.561281	0.0134072
	Recent Nevado	Ombligo	1	6.44	0.2601	58.39	8.56	0.25	27.17	0.0093	101.121	0.417079	0.567831	0.0150899
	Recent Nevado	Ombligo	154.86	7.71	0.3514	60.78	6.3	0.2481	25.23	0.0149	100.664	0.30478	0.674978	0.0202418
	Recent Nevado	Ombligo	207.3	5.33	0.1615	55.37	10.81	0.2462	28.81	0.0128	100.785	0.523547	0.467139	0.0093133
	Recent Nevado	Ombligo	75.41	6.21	0.2103	57.93	9.06	0.2462	27.66	0.0112	101.371	0.440915	0.546899	0.0121862
	Recent Nevado	Ombligo	96.67	5.84	0.2012	56.91	9.66	0.2452	28.08	0.0301	101.004	0.471961	0.516334	0.0117046
	Recent Nevado	Ombligo	11.63	6.77	0.2962	59.24	8.06	0.2387	26.57	0.0279	101.207	0.390053	0.592879	0.0170677
	Recent Nevado	Ombligo	171.08	5.79	0.201	56.95	9.62	0.2373	27.99	0	100.802	0.473028	0.515204	0.0117682
	Recent Nevado	Ombligo	143.87	6.74	0.2549	58.46	7.9	0.2369	26.97	0.0021	100.571	0.387247	0.597875	0.0148776
	Recent Nevado	Ombligo	234.86	5.91	0.2197	57.19	9.46	0.2369	28	0.0343	101.067	0.463351	0.523836	0.012813
	Recent Nevado	Ombligo	54.15	6.21	0.2299	57.74	9.03	0.2329	27.54	0.0123	101.07	0.439597	0.547076	0.0133262
	Recent Nevado	Ombligo	128.56	6.41	0.2371	57.99	8.98	0.2326	27.44	0.0445	101.334	0.430447	0.55602	0.0135324
	Recent Nevado	Ombligo	145.41	6.34	0.2193	57.92	8.87	0.2323	27.11	0.0159	100.721	0.430496	0.556831	0.0126732
	Recent Nevado	Ombligo	110.9	6.32	0.2324	57.82	8.4	0.2305	27.55	0	100.553	0.417629	0.568614	0.0137578
	Recent Nevado	Ombligo	413.6	5.86	0.2142	56.48	9.35	0.2304	27.22	0.0175	99.3973	0.462655	0.524725	0.0126202
	Recent Nevado	Ombligo	213.6	5.96	0.2244	57.12	9.61	0.2291	27.95	0.0145	101.136	0.465092	0.521977	0.0129312
	Recent Nevado	Ombligo	104.15	6.38	0.2156	57.98	8.82	0.2285	27.13	0.0084	100.771	0.427696	0.559856	0.0124485
	Recent Nevado	Ombligo	121.89	5.84	0.2016	56.25	9.48	0.2284	28.43	0.0149	100.46	0.467265	0.520903	0.0118317
	Recent Nevado	Ombligo	224.23	5.97	0.2222	57.17	9.44	0.2269	27.68	0.0098	100.751	0.460307	0.526792	0.0129009
	Recent Nevado	Ombligo	1	6.64	0.275	58.8	8.27	0.2247	27.13	0.0135	101.357	0.401196	0.582919	0.0158849
	Recent Nevado	Ombligo	202.97	5.85	0.2092	56.7	9.63	0.2245	27.96	0.0442	100.662	0.47055	0.517279	0.0121714
	Recent Nevado	Ombligo	186.67	6.04	0.221	57.09	9.16	0.2226	27.36	0.0101	100.117	0.45005	0.537021	0.0129288
[truncated: 885 more rows]

## Sheet: Pyroxenes
	Table S4: Pyroxene compositions
	Stage	Eruption	Distance from rim	Na2O	SiO2	CaO	FeO	Al2O3	TiO2	MgO	Cr2O3	MnO	Total	Wo	En	Fs
			(µm)	(wt.%)	(wt.%)	(wt.%)	(wt.%)	(wt.%)	(wt.%)	(wt.%)	(wt.%)	(wt.%)	(wt.%)	(mol.%)	(mol.%)	(mol.%)
	Young PD	28 BAF	11.72	0.0231	51.74	0.6171	26.79	1.0505	0.1151	19.61	0.0299	0.6682	100.665	0.0126421	0.558973	0.428384
	Young PD	28 BAF	1	0.0309	51.47	0.645	26.61	1.0482	0.1213	19.75	0.0181	0.6752	100.373	0.0131914	0.562018	0.424791
	Young PD	28 BAF	37.63	0.026	52.29	0.6083	26.65	0.7502	0.0899	19.81	0.0122	0.6917	100.928	0.012421	0.562827	0.424752
	Young PD	28 BAF	15.4	0.0555	51.5	0.624	26.49	1.0079	0.0942	19.72	0.0151	0.6667	100.177	0.0128029	0.562965	0.424232
	Young PD	28 BAF	25.42	0	52.56	0.6366	26.33	0.6302	0.0653	19.95	0.0122	0.6921	100.876	0.013006	0.567114	0.41988
	Young PD	28 BAF	49.84	0.0423	52.55	0.562	26.4	0.7024	0.0791	19.96	0.0065	0.7241	101.032	0.0114833	0.567468	0.421049
	Young PD	28 BAF	22.44	0	52.12	0.6689	26.24	0.9957	0.0936	20.21	0.0498	0.6123	100.99	0.0135761	0.570729	0.415695
	Young PD	28 BAF	1	0.6404	54.93	0.58	21.99	3.52	0.1091	16.97	0.0134	0.6472	100.147	0.0140245	0.570942	0.415033
	Young PD	28 BAF	62.05	0.0032	52.43	0.6059	26.04	0.8807	0.0835	20.25	0.0069	0.6412	100.942	0.0123383	0.573762	0.4139
	Young PD	28 BAF	29.8	0	51.57	0.6724	25.76	1.1452	0.1269	20.18	0.071	0.6077	100.14	0.0137624	0.574698	0.41154
	Young PD	28 BAF	43.88	0.0097	52.03	0.6926	25.79	0.8384	0.0967	20.38	0.0523	0.6691	100.563	0.0140831	0.576595	0.409322
	Young PD	28 BAF	33.16	0.0333	52.17	0.6726	25.67	1.0029	0.0986	20.41	0.0831	0.6744	100.824	0.0136965	0.578289	0.408014
	Young PD	28 BAF	13.21	0.0866	52.66	0.6134	25.57	0.7051	0.0702	20.38	0	0.6994	100.789	0.0125366	0.579552	0.407912
	Young PD	28 BAF	74.26	0.0303	52.48	0.6312	25.66	0.7833	0.0732	20.72	0.0083	0.6544	101.045	0.0127542	0.58254	0.404706
	Young PD	28 BAF	44.2	0.0538	51.57	0.6948	25.36	1.1824	0.1337	20.57	0.0975	0.6486	100.321	0.0141477	0.582789	0.403064
	Young PD	28 BAF	54.6	0	52.06	0.6835	25.09	0.9795	0.1066	20.84	0.0949	0.6174	100.472	0.0138742	0.588597	0.397529
	Young PD	28 BAF	1	0	52.77	0.5893	25.05	0.8444	0.0776	20.76	0	0.7577	100.863	0.0120198	0.589169	0.398811
	Young PD	28 BAF	86.47	0.0094	52.86	0.7019	24.64	0.8252	0.1127	21.21	0.0404	0.6362	101.043	0.0141953	0.596843	0.388962
	Young PD	28 BAF	1	0.0454	52.23	0.5243	23.64	1.2299	0.1131	20.94	0	0.7343	99.4733	0.0108974	0.605581	0.383522
	Young PD	28 BAF	58.6	0.0493	51.84	0.7909	23.78	1.2602	0.1038	21.62	0.1364	0.5671	100.156	0.015999	0.608525	0.375476
	Young PD	28 BAF	98.68	0.0137	52.94	0.8947	23.23	0.9054	0.1175	22.08	0.0415	0.5215	100.754	0.0179843	0.617543	0.364473
	Young PD	28 BAF	12.5	0.0325	52.48	0.5347	22.45	1.0932	0.1285	21.88	0.0079	0.7385	99.3585	0.0110244	0.627684	0.361291
	Young PD	28 BAF	65.32	0.0751	52.84	0.9233	22.01	1.4163	0.1379	22.57	0.1001	0.5132	100.615	0.0186499	0.634332	0.347018
	Young PD	28 BAF	87.4	0	52.42	0.8204	22.2	1.3088	0.1262	22.84	0.121	0.5432	100.391	0.0164317	0.636506	0.347062
	Young PD	28 BAF	73	0.0252	52.33	0.9395	21.83	1.568	0.1769	22.96	0.1555	0.513	100.498	0.0188181	0.639886	0.341296
	Young PD	28 BAF	110.89	0.0182	53.22	1.1603	21	1.0876	0.1291	23.55	0.095	0.4172	100.688	0.0230588	0.651191	0.32575
	Young PD	28 BAF	150.5	0.0392	53.27	0.8008	20.79	0.7386	0.0863	23.31	0.1836	0.6028	99.8342	0.0161903	0.655727	0.328082
	Young PD	28 BAF	127.5	0.0776	52.51	0.8488	20.33	1.9	0.1095	23.35	0.3009	0.5498	99.985	0.0172498	0.660262	0.322488
	Young PD	28 BAF	162	0.0363	53.43	0.7712	20.45	0.7029	0.0857	23.58	0.1918	0.6021	99.8612	0.0155664	0.662242	0.322191
	Young PD	28 BAF	76.04	0.0285	53.43	1.1557	19.99	1.2144	0.1655	24.04	0.1126	0.4116	100.554	0.0230183	0.666212	0.31077
	Young PD	28 BAF	24	0.0488	52.81	0.6667	20.08	1.4022	0.1243	23.46	0.0838	0.569	99.2531	0.0136111	0.666408	0.319981
	Young PD	28 BAF	139	0.0227	52.67	0.565	20.04	1.7862	0.1028	23.68	0.2674	0.575	99.7099	0.0114942	0.670288	0.318218
	Young PD	28 BAF	101.8	0	53.06	0.9129	19.57	1.6224	0.1755	24.75	0.177	0.4585	100.728	0.0180325	0.680235	0.301732
	Young PD	28 BAF	123.1	0.0281	53.79	1.1954	18.96	1.1507	0.1788	25.22	0.0609	0.3594	100.943	0.0234	0.686907	0.289693
	Young PD	28 BAF	135.31	0.0411	53.71	1.1552	18.74	1.2465	0.1598	25.13	0.0639	0.3776	100.636	0.0227633	0.689003	0.288234
	Young PD	28 BAF	245.8	0.0231	52.92	0.9707	18.67	1.3424	0.1831	25.48	0.1644	0.4524	100.212	0.0190347	0.695203	0.285762
	Young PD	28 BAF	86.76	0.0681	53.56	1.1594	18.26	1.3098	0.1452	25.36	0.0985	0.3719	100.333	0.0228688	0.696	0.281131
	Young PD	28 BAF	147.52	0.061	53.88	1.1723	18.14	1.1941	0.1693	25.67	0.0577	0.3499	100.697	0.0229644	0.69967	0.277365
	Young PD	28 BAF	116.2	0.0297	54.01	1.3584	17.5	0.9043	0.1504	26.06	0.1532	0.3641	100.532	0.026491	0.707125	0.266384
	Young PD	28 BAF	159.73	0.063	54.08	1.1585	17.48	1.1643	0.1288	26.24	0.0878	0.3552	100.757	0.0225773	0.711525	0.265898
	Young PD	28 BAF	260.2	0.028	52.61	1.2218	16.12	2.25	0.2119	26.45	0.4421	0.3661	99.7069	0.0241431	0.727226	0.248631
	Young PD	28 BAF	171.94	0.0697	54.59	1.221	16.31	1.0134	0.1483	27.24	0.0567	0.3726	101.028	0.0235472	0.730939	0.245514
	Young PD	28 BAF	97.48	0.0285	54.13	1.1736	16.16	1.3234	0.1465	27.01	0.1356	0.3442	100.457	0.0228465	0.731603	0.24555
	Young PD	28 BAF	184.15	0.0455	54.63	1.2306	16.1	1.0919	0.1385	27.07	0.1273	0.3635	100.802	0.0239126	0.731894	0.244193
	Young PD	28 BAF	274.6	0.0096	53.2	1.1637	15.83	2.05	0.1719	26.58	0.2748	0.3245	99.6057	0.0230422	0.732299	0.244659
	Young PD	28 BAF	196.36	0.0342	54.32	1.1952	16.06	1.2347	0.1348	27.06	0.1497	0.3193	100.509	0.0232611	0.732771	0.243968
	Young PD	28 BAF	231.4	0.082	53.62	1.2065	16.07	1.3274	0.1657	27.29	0.138	0.3312	100.239	0.023327	0.734153	0.242519
	Young PD	28 BAF	202.6	0.0292	53.77	1.1898	15.99	1.256	0.1781	27.24	0.1315	0.3072	100.092	0.0230705	0.734921	0.242008
	Young PD	28 BAF	188.2	0.0295	54.06	1.2785	15.94	1.1234	0.1541	27.38	0.1085	0.3166	100.391	0.0246734	0.735213	0.240113
	Young PD	28 BAF	129.64	0.0356	53.91	1.2833	15.83	1.0882	0.1553	27.25	0.1215	0.3487	100.022	0.0248919	0.73544	0.239668
	Young PD	28 BAF	173.8	0.069	54.06	1.3077	15.85	1.1627	0.1602	27.33	0.1263	0.3557	100.426	0.025291	0.735441	0.239268
	Young PD	28 BAF	208.57	0.0326	54.47	1.2716	15.94	0.969	0.1262	27.42	0.1076	0.315	100.652	0.0245172	0.735595	0.239887
	Young PD	28 BAF	140.36	0.0495	54	1.2523	15.78	1.1224	0.1435	27.25	0.1307	0.3413	100.072	0.0243237	0.736441	0.239236
	Young PD	28 BAF	151.08	0.064	53.96	1.2553	15.85	1.2289	0.1442	27.39	0.1434	0.3526	100.391	0.024263	0.736613	0.239124
	Young PD	28 BAF	217	0.0534	53.96	1.2336	15.81	1.1184	0.1417	27.32	0.1185	0.3548	100.115	0.023913	0.736871	0.239216
	Young PD	28 BAF	232.99	0.0234	54.63	1.3295	15.69	0.8887	0.1386	27.34	0.0796	0.3603	100.48	0.025757	0.736981	0.237262
	Young PD	28 BAF	159.4	0.0466	54.03	1.2908	15.74	1.1011	0.1962	27.37	0.1	0.3159	100.194	0.0249869	0.737189	0.237824
	Young PD	28 BAF	108.2	0.0104	53.62	1.1968	15.89	1.1576	0.1824	27.42	0.1193	0.337	99.9346	0.0231258	0.737213	0.239661
	Young PD	28 BAF	118.92	0.0274	53.95	1.2171	15.82	1.0404	0.1417	27.41	0.108	0.3199	100.044	0.02354	0.737632	0.238828
	Young PD	28 BAF	145	0.0085	54.5	1.36	15.66	0.9177	0.1275	27.55	0.1135	0.343	100.58	0.026196	0.738361	0.235443
	Young PD	28 BAF	220.78	0.0559	54.62	1.3223	15.63	0.8305	0.13	27.47	0.1043	0.3451	100.517	0.0255547	0.73867	0.235775
	Young PD	28 BAF	130.6	0.0714	54.41	1.3445	15.58	0.9135	0.135	27.44	0.149	0.3237	100.367	0.0260132	0.738699	0.235287
	Young PD	28 BAF	25.42	0.0124	52.75	1.47	14.17	3.6	0.3357	26.05	0.0108	0.3476	98.7525	0.0301376	0.743106	0.226757
	Young PD	28 BAF	13.21	0.066	53.89	1.51	13.48	2.79	0.3117	26.38	0.0198	0.3488	98.8314	0.0309828	0.753128	0.215889
	Young PD	28 BAF	116	0.075	53.8	1.0082	14.31	2.42	0.1006	27.49	0.3729	0.3102	99.8926	0.0199931	0.758508	0.221499
	Young PD	28 BAF	1	0.0302	53.62	1.3944	13.08	2.7	0.2609	27.06	0.0062	0.2852	98.4485	0.0283097	0.764412	0.207279
	Young PD	28 BAF	37.63	0.8618	43.61	4.23	11.64	3.99	0.3469	32.9	0.0073	0.2779	97.9826	0.0715827	0.774666	0.153751
	Young PD	28 BAF	35.5	0.0297	54.48	1.1583	10.87	2.31	0.0938	29.22	0.3577	0.2289	98.7625	0.0230281	0.808291	0.16868
	Young PD	28 BAF	70	0.101	53.82	1.3389	8.34	4.27	0.1256	30.16	0.8632	0.1886	99.2254	0.0268784	0.842438	0.130683
	Young PD	28 BAF	81.5	0.1048	53.68	1.3717	8.33	4.5	0.1206	30.26	0.7155	0.1747	99.2742	0.0274465	0.842456	0.130098
	Young PD	28 BAF	93	0.0705	54.48	1.2479	8.46	3.57	0.0892	30.58	0.6265	0.1928	99.326	0.0247598	0.844221	0.13102
	Young PD	28 BAF	47	0.0597	54.49	1.42	8.13	3.3	0.095	30.75	0.6573	0.1703	99.0725	0.0280903	0.846377	0.125533
	Young PD	28 BAF	104.5	0.044	54.37	1.2025	8.1	3.41	0.0993	31.28	0.736	0.1755	99.4174	0.0235564	0.852591	0.123853
	Young PD	28 BAF	58.5	0.0621	54.34	1.2475	7.82	3.49	0.0906	31.1	0.732	0.186	99.0703	0.0246426	0.854784	0.120573
	Young PD	28 BAF	49.84	0.0111	40.21	0.1329	12.01	0.0084	0.0349	45.66	0.0317	0.1716	98.28	0.00181959	0.869832	0.128348
	Young PD	28 BAF	110.89	0.0064	40.43	0.1104	11.67	0.012	0.0174	46.22	0.0454	0.1606	98.6755	0.00150143	0.874617	0.123881
	Young PD	28 BAF	62.05	0.0288	40.34	0.1292	11.55	0.0334	0.0062	46.22	0.016	0.172	98.5007	0.0017589	0.875509	0.122733
	Young PD	28 BAF	98.68	0.039	40.35	0.1027	11.33	0.033	0.0174	46.45	0.0317	0.1983	98.5623	0.00139582	0.878409	0.120196
	Young PD	28 BAF	74.26	0.0299	40.61	0.1133	11.21	0.0048	0.0062	46.65	0.0115	0.1686	98.8054	0.00153582	0.879856	0.118608
	Young PD	28 BAF	86.47	0.0066	40.34	0.1145	11.13	0.0073	0	46.55	0.0294	0.1643	98.35	0.00155631	0.880362	0.118082
	Young PD	37 BAF	21.79	0.1277	49.38	3.46	26.55	0.9309	0.1109	17.36	0	0.677	98.5968	0.0715791	0.499702	0.428719
	Young PD	37 BAF	62.68	0.6532	57.25	0.881	20.85	4.01	0.1253	12.55	0.0099	0.5599	97.7178	0.0254496	0.504429	0.470121
	Young PD	37 BAF	110.62	0.0243	51.36	0.6537	28.65	0.9125	0.1204	17.92	0.0008	0.7212	100.365	0.0136329	0.519995	0.466372
	Young PD	37 BAF	9.86	0.0013	51.14	0.5547	28.33	0.9792	0.1299	17.88	0.0101	0.7135	99.7392	0.0116667	0.523247	0.465086
	Young PD	37 BAF	94.96	0	52.18	0.7371	28.32	0.3627	0.0472	18.13	0.0046	0.7626	100.55	0.0153345	0.524797	0.459869
	Young PD	37 BAF	18.72	0	50.82	0.5796	28.11	0.9979	0.0775	17.88	0.0136	0.6892	99.1795	0.0122281	0.524868	0.462904
	Young PD	37 BAF	76.04	0.017	50.02	2.5	25.85	1.1238	0.1596	18.03	0.007	0.6704	98.3842	0.0523407	0.525226	0.422433
	Young PD	37 BAF	27.58	0.0213	51.67	0.5719	28.31	0.4435	0.0888	18.04	0	0.7542	99.9123	0.011972	0.525452	0.462576
	Young PD	37 BAF	36.44	0.0328	51.52	0.5601	28.36	0.4764	0.0786	18.13	0	0.7029	99.8693	0.0116876	0.526393	0.461919
	Young PD	37 BAF	1	0.0104	51.13	0.5653	28.06	1.03	0.1179	17.98	0.0064	0.7127	99.6128	0.0119049	0.52685	0.461245
	Young PD	37 BAF	28.72	0.0043	51.51	0.7309	28.09	1.0095	0.115	18.19	0	0.7446	100.409	0.0152379	0.527656	0.457106
	Young PD	37 BAF	80.74	0.0717	51.68	0.5993	28.3	0.549	0.0578	18.25	0.0117	0.682	100.207	0.0124642	0.528121	0.459415
	Young PD	37 BAF	54.16	0	51.57	0.5822	28.32	0.4123	0.0613	18.25	0.0131	0.7036	99.9199	0.0121089	0.528138	0.459753
	Young PD	37 BAF	45.3	0.0331	51.72	0.5476	28.21	0.4118	0.0763	18.16	0.0264	0.7433	99.9322	0.0114478	0.528232	0.46032
	Young PD	37 BAF	71.88	0.0346	51.74	0.5793	28.21	0.518	0.0739	18.24	0.0012	0.7476	100.147	0.0120744	0.528978	0.458948
	Young PD	37 BAF	14.86	0.0451	51.45	0.7493	27.92	1.0703	0.134	18.22	0.0169	0.7493	100.36	0.0156452	0.529327	0.455028
	Young PD	37 BAF	63.02	0.0093	51.76	0.545	28.32	0.4086	0.0542	18.33	0.0075	0.7166	100.151	0.0113178	0.529636	0.459046
	Young PD	37 BAF	81.78	0.026	51.5	0.6356	27.96	0.8754	0.1425	18.2	0.0107	0.7277	100.081	0.0133018	0.529966	0.456732
	Young PD	37 BAF	35.65	0.0363	51.63	0.7106	28.04	0.9024	0.1478	18.32	0	0.6931	100.488	0.0147772	0.530084	0.455139
	Young PD	37 BAF	27.19	0.0606	51.8	0.6958	27.86	0.9951	0.0892	18.26	0.0021	0.6794	100.47	0.0145417	0.530984	0.454474
	Young PD	37 BAF	72.96	0.0679	51.51	0.6896	27.92	0.8885	0.1167	18.31	0	0.7223	100.238	0.014379	0.531215	0.454406
	Young PD	37 BAF	102.79	0.0282	51.6	0.6343	27.89	0.9226	0.1302	18.25	0.001	0.723	100.183	0.0132708	0.531271	0.455459
	Young PD	37 BAF	58.7	0.0862	51.17	0.772	27.86	1.1501	0.1724	18.37	0.0381	0.7347	100.364	0.0160573	0.531636	0.452307
	Young PD	37 BAF	7.93	0.0392	51.45	0.6553	27.91	1.0122	0.1228	18.32	0.0032	0.6846	100.2	0.0136718	0.531817	0.454511
	Young PD	37 BAF	93.32	0.0037	51.55	0.5987	27.95	0.844	0.1265	18.38	0.0079	0.6934	100.154	0.0124758	0.532913	0.454611
	Young PD	37 BAF	49.51	0.0273	51.98	0.6721	27.94	0.6523	0.0775	18.44	0.0241	0.7116	100.537	0.013962	0.532997	0.453041
	Young PD	37 BAF	1	0.0538	51.57	0.5735	27.86	1.0443	0.115	18.31	0	0.7402	100.276	0.0119989	0.533025	0.454976
	Young PD	37 BAF	70.24	0.0294	51.65	0.5901	27.91	0.893	0.1187	18.37	0.0134	0.7361	100.311	0.0123104	0.53322	0.454469
	Young PD	37 BAF	12.54	0.0385	51.53	0.6281	27.89	0.952	0.0973	18.42	0	0.7232	100.28	0.013078	0.533648	0.453274
	Young PD	37 BAF	52.4	0.0284	52.05	0.6544	27.78	0.4529	0.0861	18.41	0.0107	0.7812	100.274	0.0136465	0.534175	0.452178
	Young PD	37 BAF	42.58	0.0997	52	0.7102	27.78	0.5111	0.0775	18.5	0.0119	0.6924	100.39	0.0147545	0.534768	0.450478
	Young PD	37 BAF	14.7	0	51.55	0.6126	27.65	0.6987	0.0977	18.35	0.0204	0.6738	99.6596	0.0128356	0.534964	0.4522
	Young PD	37 BAF	28.4	0.0148	51.99	0.5605	27.66	0.4226	0.0673	18.37	0.0184	0.6764	99.7854	0.011748	0.535732	0.45252
	Young PD	37 BAF	35.62	0	51.59	0.7456	27.7	0.6858	0.123	18.55	0.0025	0.7461	100.148	0.0154762	0.53574	0.448784
	Young PD	37 BAF	79.3	0.0647	52.09	0.6713	27.73	0.4413	0.0598	18.58	0	0.7129	100.359	0.0139366	0.536708	0.449355
	Young PD	37 BAF	42.12	0.035	51.36	0.6552	27.53	1.1865	0.1396	18.49	0.0196	0.7446	100.166	0.0136869	0.537427	0.448886
	Young PD	37 BAF	83.24	0.0517	51.46	0.6626	27.59	0.8579	0.1161	18.54	0	0.7125	99.9944	0.0138058	0.53749	0.448704
	Young PD	37 BAF	35.92	0.0183	51.59	0.6483	27.71	1.3343	0.137	18.63	0.0017	0.7009	100.791	0.0134505	0.537807	0.448743
	Young PD	37 BAF	104.86	0.0262	51.39	0.5828	27.7	0.8655	0.1378	18.61	0	0.7033	100.019	0.012117	0.538359	0.449524
	Young PD	37 BAF	179.1	0.0142	51.41	1.1802	26.53	0.6731	0.0897	18.41	0.0149	0.6914	99.0194	0.0248444	0.539234	0.435921
	Young PD	37 BAF	88.36	0.0423	51.65	0.608	27.29	1.0982	0.2082	18.51	0.0203	0.7325	100.161	0.012756	0.540341	0.446903
	Young PD	37 BAF	18.46	0.0545	51.83	0.6427	27.49	0.9983	0.1192	18.7	0	0.6904	100.541	0.0133565	0.540724	0.445919
	Young PD	37 BAF	47.16	0	51.79	0.6659	27.32	0.9417	0.132	18.62	0	0.6998	100.169	0.0139024	0.540893	0.445205
	Young PD	37 BAF	42.1	0.0174	51.88	0.6941	27.11	0.5284	0.1097	18.53	0.0042	0.7019	99.588	0.0145705	0.541227	0.444202
	Young PD	37 BAF	113.32	0.0345	51.95	0.7058	27.01	0.7094	0.1651	18.55	0.011	0.6971	99.8354	0.0148281	0.54225	0.442922
	Young PD	37 BAF	100.84	0	51.56	0.6236	27.09	1.1891	0.2555	18.71	0.0229	0.7271	100.181	0.0130456	0.544606	0.442349
	Young PD	37 BAF	87.13	0.0514	51.67	0.6622	27.1	0.9374	0.1096	18.88	0.0066	0.6931	100.121	0.0137716	0.54632	0.439908
	Young PD	37 BAF	29.14	0.0362	51.51	0.8333	26.8	1.176	0.1752	18.86	0.0146	0.7193	100.125	0.0173627	0.546775	0.435862
	Young PD	37 BAF	47.9	0.0226	51.47	0.7336	26.9	1.3334	0.1805	18.85	0.0364	0.6886	100.215	0.0152967	0.54689	0.437813
	Young PD	37 BAF	31.84	0.0475	51.23	1.1136	26.48	1.1246	0.1423	18.95	0.0082	0.6716	99.7679	0.023128	0.547607	0.429265
	Young PD	37 BAF	75.88	0.0174	51.71	0.7279	26.83	0.9001	0.1796	18.86	0.0204	0.691	99.9372	0.0151925	0.547711	0.437097
	Young PD	37 BAF	151.7	0.0403	52.23	0.8783	26.48	0.4948	0.1166	18.76	0.006	0.683	99.6939	0.0184324	0.547801	0.433766
	Young PD	37 BAF	165.4	0.0488	52.06	0.7153	26.78	0.5328	0.0866	18.89	0.0033	0.6893	99.8087	0.0149326	0.548695	0.436372
	Young PD	37 BAF	93.52	0.0266	51.44	0.7521	26.82	0.9943	0.1199	18.97	0.0104	0.6811	99.8145	0.0156423	0.548964	0.435394
	Young PD	37 BAF	192.8	0.0382	51.71	0.7391	26.42	1.055	0.1459	18.85	0.0026	0.7361	99.6983	0.0155309	0.551133	0.433336
	Young PD	37 BAF	55.8	0.0499	51.96	0.7956	26.57	0.5108	0.0902	19.05	0	0.6744	99.7059	0.0165609	0.551741	0.431698
	Young PD	37 BAF	138	0.0198	51.73	1.3687	25.79	0.5499	0.1163	19.02	0	0.6679	99.2664	0.0285364	0.551762	0.419701
	Young PD	37 BAF	124.3	0.0516	51.53	1.73	25.41	0.4435	0.1109	19.1	0.0081	0.665	99.0498	0.0359373	0.552057	0.412005
	Young PD	37 BAF	55.81	0	51.85	0.8537	26.56	0.9277	0.1631	19.14	0.005	0.6991	100.198	0.0177056	0.55233	0.429964
	Young PD	37 BAF	66.66	0.005	51.58	0.7598	26.63	1.3828	0.1675	19.23	0.0275	0.7309	100.522	0.0157301	0.55394	0.43033
	Young PD	37 BAF	47.98	0.0225	51.8	0.8547	26.26	0.8899	0.1649	19.11	0.0139	0.6838	99.8042	0.017828	0.554627	0.427545
	Young PD	37 BAF	19.76	0.0086	51.98	0.7967	26.42	0.8662	0.0964	19.19	0.0033	0.7367	100.109	0.0165567	0.554886	0.428557
	Young PD	37 BAF	57.28	0.0733	51.57	0.7767	26.34	1.4146	0.1914	19.15	0.0056	0.696	100.218	0.0161875	0.555323	0.428489
	Young PD	37 BAF	24.49	0	52.42	0.8553	26.53	0.6485	0.1326	19.37	0.0257	0.6661	100.664	0.0176298	0.555532	0.426839
	Young PD	37 BAF	69.5	0.0455	51.98	1.0373	26.02	0.4376	0.1071	19.26	0.01	0.6819	99.5805	0.0215452	0.556612	0.421843
	Young PD	37 BAF	1	0.0078	51.65	0.6676	26.01	1.0987	0.1436	18.96	0.0198	0.6747	99.2407	0.0140991	0.557141	0.42876
	Young PD	37 BAF	63.4	0.0013	52.24	0.876	26.13	0.8563	0.138	19.26	0.0019	0.6691	100.186	0.0182234	0.557485	0.424291
	Young PD	37 BAF	32.32	0.0275	52.41	0.881	26.49	0.5587	0.1621	19.55	0.0119	0.7074	100.806	0.0180683	0.557877	0.424054
	Young PD	37 BAF	63.64	0.0248	52.1	0.8639	26.06	0.8177	0.1374	19.29	0.0255	0.6694	99.9984	0.0179811	0.558644	0.423375
	Young PD	37 BAF	40.15	0	52.03	0.8857	26.07	0.8266	0.1472	19.41	0.0114	0.658	100.046	0.0183597	0.559829	0.421811
	Young PD	37 BAF	1	0.0266	51.73	0.8299	26.02	0.9753	0.1827	19.33	0.0019	0.7011	99.8117	0.0172768	0.559914	0.422809
	Young PD	37 BAF	16.66	0	52.24	0.8203	26.26	0.6227	0.1075	19.51	0.0137	0.6945	100.271	0.0169261	0.560135	0.422939
	Young PD	37 BAF	71.47	0.0133	52.13	0.8462	26.13	0.8754	0.1663	19.49	0	0.6936	100.345	0.0174979	0.560757	0.421745
	Young PD	37 BAF	38.52	0	51.77	0.882	25.94	1.2705	0.1726	19.45	0.0222	0.6537	100.161	0.0183018	0.561559	0.420139
	Young PD	37 BAF	8.83	0	52.44	0.7938	26.32	0.6194	0.1081	19.68	0.0113	0.6842	100.662	0.016293	0.562037	0.42167
	Young PD	37 BAF	85.42	0	51.88	0.8136	26.01	1.1396	0.1414	19.49	0.0195	0.657	100.154	0.0168678	0.562225	0.420907
	Young PD	37 BAF	96.9	0.0602	51.93	0.8117	25.79	0.6721	0.131	19.4	0	0.6896	99.4954	0.0169333	0.563118	0.419949
	Young PD	37 BAF	83.2	0.041	52.18	0.8302	25.73	0.4841	0.1364	19.41	0.0154	0.6834	99.5133	0.0173245	0.563578	0.419098
	Young PD	37 BAF	21.56	0.0214	52.08	0.8149	26	0.9248	0.1694	19.62	0.029	0.6331	100.304	0.0168339	0.563936	0.41923
	Young PD	37 BAF	11.28	0.0508	51.98	0.7825	25.85	0.9935	0.1424	19.54	0.0286	0.6702	100.046	0.0162521	0.564679	0.419069
	Young PD	37 BAF	110.6	0	52.32	0.8195	25.7	0.39	0.0796	19.54	0.0152	0.6653	99.5357	0.017049	0.56562	0.417331
	Young PD	37 BAF	24.08	0.0449	52.03	0.858	25.86	1.0339	0.1565	19.77	0.0315	0.6648	100.451	0.0176722	0.56658	0.415748
	Young PD	37 BAF	1	0.1048	52.79	0.7912	25.96	0.4737	0.1221	19.79	0.0003	0.6918	100.725	0.0162832	0.566697	0.41702
	Young PD	37 BAF	50.92	0.0689	52.04	0.7947	25.82	0.8737	0.1573	19.71	0.0064	0.691	100.173	0.0164286	0.566939	0.416633
	Young PD	37 BAF	10.38	0.0223	51.86	0.9005	25.58	1.0397	0.1781	19.83	0.002	0.6868	100.099	0.018583	0.569385	0.412032
	Young PD	37 BAF	1	0.0031	52.16	0.7482	25.66	0.9449	0.1793	19.93	0.0262	0.6866	100.351	0.0154244	0.571675	0.412901
	Young PD	37 BAF	9.73	0.043	52.22	0.8361	25.53	1.0664	0.1475	19.95	0.0213	0.6448	100.479	0.0172314	0.57208	0.410688
	Young PD	37 BAF	38.44	0.026	52.51	0.8881	24.94	0.7153	0.1329	19.89	0.0146	0.6894	99.8117	0.0184906	0.576202	0.405307
	Young PD	37 BAF	25.96	0.0121	52.54	0.939	24.75	0.4248	0.1083	20.28	0.0162	0.6989	99.7826	0.0193708	0.582104	0.398525
	Young PD	37 BAF	1	0.0353	52.27	0.8718	24.52	0.9395	0.1563	20.54	0	0.6477	99.9934	0.0179419	0.588171	0.393887
	Young PD	37 BAF	1	0.0505	52.63	0.89	24.5	0.9044	0.1912	20.62	0	0.6777	100.478	0.0182737	0.589081	0.392645
	Young PD	37 BAF	13.48	0.0385	52.58	0.9987	23.94	0.6311	0.1109	20.65	0.0185	0.672	99.6546	0.0206269	0.593431	0.385942
	Young PD	37 BAF	18.72	0.0313	52.71	0.8012	23.19	0.8148	0.1236	21.3	0.0658	0.6442	99.693	0.0165064	0.610578	0.372915
	Young PD	37 BAF	1	0.0154	53.23	0.8658	22.91	0.6019	0.1372	21.55	0.0309	0.6616	100.013	0.0177663	0.615287	0.366947
	Young PD	37 BAF	9.86	0.0724	52.62	0.8748	22.83	0.8306	0.1496	21.52	0.0531	0.6576	99.6183	0.0179861	0.615633	0.366381
	Young PD	37 BAF	27.58	0.0033	52.6	0.821	22.7	1.1744	0.1412	21.66	0.1227	0.6275	99.8598	0.0168663	0.619135	0.363999
	Young PD	37 BAF	1	0.0274	52.54	0.8158	22.65	1.2162	0.1566	21.63	0.0674	0.5918	99.7053	0.0167891	0.619371	0.36384
	Young PD	37 BAF	9.41	0.0392	52.31	0.837	22.07	1.0832	0.1355	22.27	0.2699	0.5537	99.5686	0.0170642	0.63173	0.351205
	Young PD	37 BAF	1	0.0425	52.87	0.917	21.79	0.8449	0.1187	22.43	0.1628	0.5774	99.7613	0.0186632	0.63518	0.346156
	Young PD	37 BAF	17.82	0.0764	52.63	0.8981	20.21	1.2151	0.1469	23.18	0.3608	0.5524	99.2825	0.0183565	0.659218	0.322426
	Young PD	37 BAF	26.23	0.0544	53.79	1.0163	17.5	1.1186	0.118	25.57	0.3612	0.3788	99.9189	0.0202233	0.707966	0.271811
	Young PD	37 BAF	43.05	0.0887	54.28	1.0322	15.59	0.9741	0.1596	27.05	0.3103	0.3577	99.8471	0.0203036	0.740335	0.239362
	Young PD	37 BAF	34.64	0.0776	54.31	1.0337	15.36	0.9692	0.1334	27.45	0.3194	0.341	100.001	0.0201829	0.74573	0.234087
	Young PD	37 BAF	36.44	0.0476	54.16	0.9706	14.9	1.5722	0.1707	27.14	0.26	0.3388	99.56	0.019272	0.749803	0.230925
	Young PD	37 BAF	125.04	0.0312	54.15	1.1065	14.65	1.8253	0.1394	27.3	0.3779	0.3378	99.9181	0.0218993	0.751784	0.226316
	Young PD	37 BAF	142.76	0.0358	54.05	1.0981	14.49	1.94	0.1818	27.13	0.4363	0.3483	99.7104	0.0218933	0.752612	0.225495
	Young PD	37 BAF	54.16	0.0343	54.39	0.9622	14.82	1.5453	0.1603	27.49	0.2515	0.3544	100.013	0.0189486	0.753248	0.227803
	Young PD	37 BAF	116.18	0.026	54.12	1.0174	14.64	1.93	0.1535	27.36	0.3894	0.3332	99.9696	0.0201413	0.753637	0.226222
	Young PD	37 BAF	45.3	0.062	54.41	0.9513	14.65	1.4591	0.1756	27.57	0.2668	0.335	99.8799	0.0187459	0.755921	0.225333
	Young PD	37 BAF	151.62	0.0456	54.32	1.054	14.53	1.5747	0.1469	27.64	0.396	0.3354	100.043	0.0207262	0.756254	0.22302
	Young PD	37 BAF	107.32	0.0353	54.23	0.9892	14.46	1.8406	0.134	27.53	0.3673	0.3285	99.915	0.0195567	0.757302	0.223141
	Young PD	37 BAF	63.02	0.0496	54.49	0.9501	14.49	1.5301	0.174	27.73	0.3184	0.3599	100.099	0.0186867	0.758864	0.222449
	Young PD	37 BAF	160.48	0.0558	55.19	1.1298	14.32	0.8891	0.1138	28.09	0.2155	0.3349	100.344	0.0219842	0.760521	0.217495
	Young PD	37 BAF	133.9	0.0005	55.31	1.2069	14.13	0.7063	0.12	27.97	0.2197	0.3202	99.9837	0.0235938	0.760798	0.215609
	Young PD	37 BAF	89.6	0.0104	54.19	0.9332	14.3	1.5589	0.1216	27.66	0.3476	0.324	99.4511	0.0184496	0.760879	0.220672
	Young PD	37 BAF	51.46	0.0414	54.79	0.9954	14.24	0.8478	0.085	27.73	0.2886	0.3454	99.3696	0.0196355	0.761107	0.219257
	Young PD	37 BAF	98.46	0.0375	54.46	0.8724	14.38	1.4953	0.1291	27.76	0.3553	0.3032	99.7977	0.0171997	0.76151	0.22129
	Young PD	37 BAF	169.34	0.0363	54.98	1.0251	14.28	0.9005	0.1207	28.05	0.1911	0.348	99.9388	0.0200215	0.762279	0.217699
	Young PD	37 BAF	80.74	0.0533	54.4	0.9566	14.24	1.4461	0.1199	27.85	0.3323	0.3357	99.7388	0.0188226	0.762473	0.218704
	Young PD	37 BAF	71.88	0.0168	54.51	0.8662	14.4	1.4715	0.1378	27.95	0.3019	0.3297	99.994	0.0169858	0.762606	0.220408
	Young PD	37 BAF	76.69	0.0483	55.12	1.1871	14.06	0.696	0.1072	28.11	0.2117	0.3385	99.8867	0.0231522	0.762811	0.214037
	Young PD	37 BAF	85.1	0.127	55.02	1.0989	14.07	0.6867	0.1466	27.98	0.2416	0.339	99.7116	0.0215418	0.763172	0.215286
	Young PD	37 BAF	93.51	0.056	55	1.0966	14.06	0.6736	0.1281	28.01	0.227	0.3243	99.5757	0.0214834	0.763517	0.215
	Young PD	37 BAF	68.28	0.0626	54.97	1.1342	14.12	0.6308	0.0918	28.21	0.2414	0.3484	99.8147	0.0220632	0.763543	0.214394
	Young PD	37 BAF	118.74	0.0281	54.98	1.1255	14.03	0.6454	0.1035	28.13	0.2521	0.3131	99.6087	0.0219753	0.764206	0.213819
	Young PD	37 BAF	101.92	0.0713	55.22	1.1233	14.02	0.6589	0.0999	28.21	0.2341	0.3288	99.9786	0.0218891	0.764866	0.213245
	Young PD	37 BAF	59.87	0.0272	55.02	1.0856	14.07	0.6879	0.0943	28.22	0.2449	0.325	99.7786	0.0211482	0.76491	0.213942
	Young PD	37 BAF	110.33	0.05	55.3	1.089	13.99	0.6392	0.1227	28.25	0.2135	0.3339	99.9891	0.0212215	0.765982	0.212797
	Old Nevado	BAF970	102.97	0.6237	50.49	20.76	8.66	4.36	0.802	14.53	0.029	0.2301	100.485	0.434887	0.423512	0.141601
	Old Nevado	BAF970	232	0.5809	50.38	21.26	7.82	4.04	0.7914	14.62	0.2322	0.1603	99.8849	0.445645	0.426407	0.127947
	Old Nevado	BAF970	210	0.5299	50.67	21.06	7.76	4.14	0.7429	14.62	0.2625	0.2072	99.9984	0.443749	0.428625	0.127626
	Old Nevado	BAF970	221	0.5826	50.75	21.03	7.7	4	0.7385	14.77	0.2734	0.1677	100.012	0.441889	0.431823	0.126288
	Old Nevado	BAF970	93.7	0.527	51.05	21.37	7.66	3.68	0.6788	14.97	0.1441	0.1683	100.248	0.443562	0.432337	0.124101
	Old Nevado	BAF970	23	0.4782	50.69	21.34	7.4	3.31	0.5624	14.91	0.4501	0.2084	99.3498	0.445867	0.433451	0.120682
	Old Nevado	BAF970	298	0.5915	50.49	20.5	8.04	4.28	0.7719	14.74	0.3674	0.2299	100.015	0.433543	0.433738	0.132719
	Old Nevado	BAF970	243	0.5373	50.55	20.82	7.92	4.04	0.7198	14.87	0.3344	0.2029	99.9945	0.436551	0.433827	0.129622
	Old Nevado	BAF970	75.16	0.4692	50.86	21.11	7.63	3.64	0.654	15	0.5474	0.1855	100.096	0.440374	0.435387	0.124239
	Old Nevado	BAF970	188	0.5499	50.63	20.74	7.78	4.03	0.667	14.86	0.2376	0.2154	99.71	0.436735	0.43539	0.127875
	Old Nevado	BAF970	254	0.5525	50.7	20.8	7.94	3.92	0.7794	14.97	0.3096	0.2245	100.196	0.434903	0.435514	0.129583
	Old Nevado	BAF970	34	0.4987	50.84	21.13	7.42	3.39	0.5565	14.95	0.5015	0.2051	99.4953	0.442763	0.435877	0.12136
	Old Nevado	BAF970	1	0.4915	51.21	21.29	7.34	3.29	0.5013	15.01	0.4554	0.192	99.7956	0.44443	0.435973	0.119597
	Old Nevado	BAF970	287	0.5488	50.51	20.24	7.84	4.79	0.7994	14.68	0.3811	0.2081	100.022	0.432616	0.436585	0.1308
	Old Nevado	BAF970	84.43	0.5679	50.85	20.86	7.66	3.91	0.6257	14.96	0.5698	0.1968	100.204	0.437736	0.436798	0.125466
	Old Nevado	BAF970	199	0.5226	50.65	20.81	7.76	3.96	0.6466	15	0.2341	0.2297	99.813	0.435921	0.437198	0.126881
	Old Nevado	BAF970	45	0.5536	51.31	21.07	7.42	3.35	0.5556	15.02	0.4881	0.1704	99.9408	0.44116	0.437575	0.121265
	Old Nevado	BAF970	12	0.4661	51.06	21.21	7.33	3.34	0.5618	15.06	0.4572	0.1906	99.6757	0.442929	0.437591	0.11948
	Old Nevado	BAF970	265	0.5184	50.67	20.6	7.97	3.82	0.6661	15.02	0.2805	0.2018	99.7532	0.431687	0.437948	0.130364
	Old Nevado	BAF970	56.62	0.5019	51.23	20.95	7.67	3.33	0.5167	15.1	0.4838	0.2085	99.993	0.436942	0.438195	0.124863
	Old Nevado	BAF970	276	0.5385	50.54	20.49	8.01	3.95	0.6933	15	0.2897	0.1843	99.6959	0.430344	0.438344	0.131312
	Old Nevado	BAF970	309	0.538	50.62	20.21	8.08	4.13	0.6903	14.89	0.4151	0.2189	99.7924	0.427863	0.438616	0.133521
	Old Nevado	BAF970	177	0.552	50.98	20.85	7.76	3.79	0.592	15.14	0.2502	0.1807	100.095	0.434621	0.439119	0.12626
	Old Nevado	BAF970	111	0.5319	50.85	20.55	7.91	3.83	0.5967	15.07	0.3659	0.202	99.9136	0.430886	0.439657	0.129457
	Old Nevado	BAF970	122	0.5592	50.79	20.8	7.66	3.68	0.5708	15.13	0.3987	0.1987	99.7875	0.434866	0.440131	0.125003
	Old Nevado	BAF970	133	0.5635	50.72	20.77	7.66	3.86	0.6313	15.12	0.3937	0.194	99.9126	0.434638	0.440244	0.125118
	Old Nevado	BAF970	65.89	0.5081	51.22	20.79	7.58	3.48	0.601	15.1	0.5072	0.205	99.9923	0.435697	0.44031	0.123993
	Old Nevado	BAF970	166	0.5486	50.75	20.58	7.93	3.96	0.6521	15.17	0.2951	0.2193	100.105	0.42985	0.440867	0.129283
	Old Nevado	BAF970	155	0.5477	50.79	20.71	7.57	3.81	0.663	15.11	0.3512	0.1719	99.7238	0.434694	0.441285	0.124022
	Old Nevado	BAF970	144	0.5398	50.91	20.88	7.66	3.68	0.5897	15.25	0.4187	0.1724	100.1	0.434296	0.441343	0.124361
	Old Nevado	BAF970	78	0.4651	51.29	21.34	7.19	3.19	0.5321	15.37	0.4492	0.2019	100.028	0.441476	0.442422	0.116102
	Old Nevado	BAF970	56	0.5232	51.13	21.04	7.25	3.35	0.5344	15.28	0.4944	0.1782	99.7879	0.438704	0.443302	0.117994
	Old Nevado	BAF970	100	0.5239	51.14	20.67	7.56	3.51	0.5339	15.21	0.4802	0.189	99.818	0.433024	0.443355	0.123621
	Old Nevado	BAF970	67	0.5033	51.06	20.94	7.32	3.37	0.5878	15.29	0.5241	0.1889	99.7847	0.436905	0.443883	0.119212
	Old Nevado	BAF970	47.35	0.4961	51.51	21.14	7.32	3.04	0.5016	15.42	0.3732	0.1952	99.9985	0.4376	0.444128	0.118272
	Old Nevado	BAF970	89	0.4951	51.41	21.08	7.31	3.15	0.5529	15.39	0.4265	0.1946	100.015	0.43735	0.444271	0.118379
	Old Nevado	BAF970	38.08	0.5602	51.53	20.91	7.28	3.29	0.5256	15.48	0.5082	0.1795	100.263	0.434438	0.447502	0.11806
	Old Nevado	BAF970	320	0.6058	50.48	19.44	8.52	4.31	0.7543	15.21	0.4475	0.219	99.9955	0.411399	0.447865	0.140736
	Old Nevado	BAF970	10.27	0.4403	52.04	21.31	7	2.64	0.4118	15.62	0.3944	0.1754	100.04	0.439314	0.448047	0.112639
	Old Nevado	BAF970	28.81	0.4427	52.17	21.08	7.06	2.61	0.39	15.73	0.3962	0.1726	100.051	0.434843	0.451483	0.113675
	Old Nevado	BAF970	112.24	0.4267	52.54	20.5	8.02	2.17	0.3506	16.19	0.0833	0.2412	100.522	0.415934	0.457055	0.127012
	Old Nevado	BAF970	19.54	0.4558	52.51	21.02	6.94	2.17	0.3729	16.11	0.3371	0.192	100.115	0.430276	0.458839	0.110885
	Old Nevado	BAF970	121.51	0.4933	52.35	20.55	7.54	2.15	0.3394	16.29	0.3103	0.1787	100.206	0.418524	0.461615	0.119861
	Old Nevado	BAF970	130.78	0.4488	52.63	20.53	7.49	2.13	0.3056	16.31	0.3153	0.2146	100.376	0.418382	0.462476	0.119142
	Old Nevado	BAF970	1	0.5813	54.24	13.87	11.79	2.75	0.3571	14.38	0.2779	0.3228	99.088	0.321952	0.464435	0.213613
	Old Nevado	BAF970	155.32	0.0124	50.56	0.5858	27.3	2.44	0.1859	17.45	0.0069	0.6161	99.1792	0.0126866	0.525828	0.461486
	Old Nevado	BAF970	9.92	0.4055	53.8	0.2553	26.99	1.4066	0.1181	17.04	0.0094	0.6072	100.881	0.00566935	0.526505	0.467825
	Old Nevado	BAF970	168.18	0.0384	51.25	0.4954	28.16	1.4224	0.092	18.34	0.0121	0.6527	100.477	0.0103222	0.531698	0.45798
	Old Nevado	BAF970	193.9	0	51.23	0.5312	27.9	1.7551	0.0998	18.39	0.0023	0.601	100.513	0.0110906	0.534234	0.454675
	Old Nevado	BAF970	181.04	0.0478	51.1	0.4818	27.87	1.5631	0.1064	18.36	0.0487	0.6532	100.231	0.0100834	0.534641	0.455275
	Old Nevado	BAF970	142.46	0.0174	51.16	0.5761	27.97	1.3959	0.116	18.55	0.021	0.669	100.482	0.0119477	0.535282	0.452771
	Old Nevado	BAF970	129.6	0.0094	51.75	0.5978	27.84	1.1173	0.1299	18.64	0.012	0.6632	100.77	0.0123861	0.537372	0.450242
	Old Nevado	BAF970	116.74	0	51.65	0.6474	27.15	1.1015	0.0939	19.07	0.0224	0.6515	100.387	0.0133835	0.548526	0.438091
	Old Nevado	BAF970	91.02	0.0173	51.95	0.6781	26.07	1.2693	0.1299	19.86	0.0502	0.5809	100.615	0.0139355	0.567881	0.418183
	Old Nevado	BAF970	103.88	0.0173	51.85	0.6864	25.78	1.1552	0.1614	20.01	0.0193	0.5717	100.262	0.0141087	0.57228	0.413611
	Old Nevado	BAF970	52.44	0.0558	52.96	0.688	25.42	1.4082	0.1586	19.87	0.0497	0.4825	101.094	0.0142808	0.57387	0.411849
	Old Nevado	BAF970	87.46	0.0221	51.64	0.586	25.61	1.91	0.1203	19.95	0.0485	0.6036	100.493	0.0121239	0.574301	0.413575
	Old Nevado	BAF970	78.16	0.0359	52.28	0.7121	25.58	1.189	0.1518	20.24	0.0274	0.5587	100.782	0.0145802	0.576611	0.408809
	Old Nevado	BAF970	79.6	0.0124	51.84	0.5804	25.74	1.5576	0.1149	20.27	0.0276	0.6251	100.777	0.0118751	0.577053	0.411072
	Old Nevado	BAF970	71.74	0.0419	52.12	0.6581	25.64	1.3237	0.118	20.28	0.0094	0.6382	100.829	0.0134612	0.577177	0.409361
	Old Nevado	BAF970	95.32	0.0225	51.56	0.5854	25.53	1.9	0.1511	20.24	0.0266	0.6041	100.632	0.0120268	0.578574	0.409399
	Old Nevado	BAF970	63.88	0.0174	51.9	0.6004	25.41	1.5445	0.1258	20.24	0.016	0.623	100.484	0.0123549	0.579511	0.408134
	Old Nevado	BAF970	111.04	0	51.96	0.5843	25.27	1.735	0.1337	20.2	0.01	0.5654	100.462	0.0120686	0.580528	0.407403
	Old Nevado	BAF970	219.62	0.0184	51.9	0.6914	25.33	1.3097	0.1742	20.48	0.0032	0.5498	100.457	0.0141222	0.582041	0.403837
	Old Nevado	BAF970	103.18	0.0314	51.92	0.5933	25.31	1.5497	0.1204	20.43	0.021	0.6083	100.587	0.012164	0.582802	0.405034
	Old Nevado	BAF970	56.02	0.0608	52.06	0.5509	25.29	1.5236	0.1306	20.39	0.0024	0.5882	100.597	0.0113211	0.583019	0.40566
	Old Nevado	BAF970	232.48	0.032	51.61	0.8357	24.89	1.5665	0.2506	20.41	0.0089	0.5453	100.157	0.0171736	0.583586	0.39924
	Old Nevado	BAF970	48.16	0.0295	52.06	0.5546	25.33	1.4534	0.1131	20.49	0	0.5908	100.623	0.0113565	0.58379	0.404853
	Old Nevado	BAF970	40.3	0.0003	52.03	0.5387	25.23	1.3927	0.1198	20.5	0.0053	0.6348	100.46	0.011049	0.585034	0.403917
	Old Nevado	BAF970	206.76	0.0372	51.65	0.6901	25.13	1.2752	0.1766	20.62	0.0095	0.5747	100.163	0.0140849	0.585572	0.400343
	Old Nevado	BAF970	32.44	0.0294	52.02	0.5496	25.15	1.4525	0.1113	20.59	0	0.64	100.549	0.0112556	0.586716	0.402029
	Old Nevado	BAF970	73	0	52.09	0.6564	24.71	1.1499	0.1164	20.75	0.0114	0.6849	100.173	0.0134466	0.591445	0.395108
	Old Nevado	BAF970	65	0.0272	52.04	0.6263	24.68	1.221	0.1285	20.83	0	0.6667	100.22	0.0128149	0.593023	0.394162
	Old Nevado	BAF970	65.3	0.0264	52.19	0.7031	24.64	1.2231	0.1672	20.93	0.0282	0.5162	100.434	0.0143321	0.593626	0.392042
	Old Nevado	BAF970	31.15	0	51.42	0.6762	24.75	1.6982	0.1646	21.04	0.0568	0.6541	100.478	0.0137245	0.594178	0.392097
	Old Nevado	BAF970	57	0.007	52.24	0.6659	24.52	1.1752	0.1085	20.86	0.0107	0.6821	100.277	0.0136373	0.594407	0.391956
	Old Nevado	BAF970	43.21	0.0489	51.38	0.6369	24.56	2.13	0.1672	20.91	0.0311	0.6418	100.513	0.0130242	0.594957	0.392019
	Old Nevado	BAF970	49	0.0315	52.06	0.59	24.56	1.279	0.1242	20.94	0	0.6744	100.274	0.0120664	0.595873	0.39206
	Old Nevado	BAF970	37.18	0.04	51.38	0.6829	24.47	1.7377	0.1586	21.1	0.0476	0.6813	100.308	0.0138967	0.597429	0.388674
	Old Nevado	BAF970	245.34	0.0367	51.81	0.9554	23.93	1.814	0.3404	20.97	0.0427	0.5019	100.409	0.0195733	0.597761	0.382666
	Old Nevado	BAF970	25.12	0.0344	51.78	0.5916	24.4	1.8333	0.1866	21.13	0.0524	0.5896	100.608	0.0120643	0.59955	0.388386
	Old Nevado	BAF970	29.32	0.03	52.66	0.6049	24.49	0.4386	0.0745	21.24	0.0094	0.7855	100.343	0.0122763	0.599777	0.387946
	Old Nevado	BAF970	38.76	0.0077	52.81	0.5739	24.45	0.4233	0.0648	21.26	0.0042	0.7555	100.354	0.0116553	0.600761	0.387583
	Old Nevado	BAF970	39.58	0.0014	52.34	0.7367	24.26	1.2617	0.1813	21.33	0.0349	0.5378	100.691	0.0149277	0.601373	0.383699
	Old Nevado	BAF970	13.06	0.0501	51.84	0.6371	23.99	1.8811	0.174	21	0.0598	0.6449	100.285	0.013114	0.601447	0.385439
	Old Nevado	BAF970	19.09	0.0532	51.68	0.6061	24.16	1.8137	0.137	21.29	0.0661	0.6404	100.446	0.0123475	0.603477	0.384175
	Old Nevado	BAF970	19.88	0.0931	52.71	0.6342	24.07	0.4414	0.0418	21.49	0	0.7065	100.191	0.0128581	0.60623	0.380912
	Old Nevado	BAF970	38.04	0.0662	53.65	0.975	22.19	1.6673	0.1851	20.39	0.1389	0.6041	99.9272	0.0208932	0.607951	0.371156
	Old Nevado	BAF970	48.2	0.0267	52.54	0.7808	23.72	0.5673	0.0825	21.61	0.001	0.741	100.069	0.0158174	0.609117	0.375066
	Old Nevado	BAF970	7.03	0.0086	51.88	0.6822	23.7	1.8069	0.1432	21.61	0.0291	0.5822	100.454	0.013852	0.610529	0.375619
	Old Nevado	BAF970	47.3	0.0094	52.25	1.217	22.41	1.7112	0.2581	21.45	0.154	0.6236	100.083	0.0250646	0.61468	0.360256
	Old Nevado	BAF970	56.56	0.0513	52.65	0.9988	22.43	1.64	0.2058	21.26	0.1064	0.6017	99.949	0.0207705	0.615151	0.364079
	Old Nevado	BAF970	1	0.0535	52.39	0.6815	23.43	1.4921	0.1227	21.85	0.0107	0.6121	100.653	0.0138035	0.615778	0.370418
	Old Nevado	BAF970	41	0.014	52.51	0.6567	23.25	1.0593	0.0863	21.75	0	0.6709	99.9973	0.0133837	0.616763	0.369853
	Old Nevado	BAF970	65.82	0.0454	52.52	0.9816	22.53	1.3971	0.1954	21.5	0.0788	0.5761	99.8265	0.0202466	0.61703	0.362724
	Old Nevado	BAF970	13.86	0.0403	52.79	0.8151	23.14	1.1963	0.1843	22.1	0.022	0.4884	100.788	0.0164246	0.619622	0.363953
	Old Nevado	BAF970	75.08	0.0385	52.63	0.948	22.22	1.0395	0.1851	21.86	0.0516	0.6643	99.6381	0.0194631	0.624459	0.356078
	Old Nevado	BAF970	26.72	0.0482	52.41	0.7771	22.79	1.3241	0.1601	22.31	0.053	0.4753	100.361	0.0156649	0.62575	0.358586
	Old Nevado	BAF970	1	0.0211	53.1	0.8006	22.63	1.0643	0.1448	22.26	0.0312	0.5496	100.653	0.0161944	0.626506	0.357299
	Old Nevado	BAF970	84.34	0.0136	52.96	0.8979	22.08	1.0522	0.1662	21.91	0.0175	0.654	99.7514	0.0184685	0.627043	0.354488
	Old Nevado	BAF970	10.44	0	53	0.7638	22.58	0.5019	0.0712	22.29	0.0261	0.6312	99.8872	0.0154607	0.627783	0.356756
	Old Nevado	BAF970	57.64	0.0381	53.06	0.7482	22.8	0.4879	0.0657	22.49	0.0092	0.6881	100.418	0.0150129	0.627895	0.357092
	Old Nevado	BAF970	25	0.0406	53.05	0.6827	22.47	0.9162	0.137	22.25	0	0.6709	100.223	0.0138816	0.629493	0.356625
	Old Nevado	BAF970	1	0.0205	52.74	0.9549	21.97	1.7092	0.2146	22.85	0.0062	0.6223	101.089	0.0191375	0.637182	0.34368
	Old Nevado	BAF970	28.78	0.0254	53.16	0.691	21.58	1.0144	0.1439	22.52	0.0025	0.6449	99.7909	0.0141397	0.641183	0.344677
	Old Nevado	BAF970	8.86	0.0581	52.79	0.8458	21.76	1.2887	0.1976	22.97	0	0.6278	100.538	0.0169871	0.641893	0.34112
	Old Nevado	BAF970	33	0.0305	53.19	0.8025	21.67	0.9314	0.1361	22.83	0.0148	0.6114	100.222	0.0162179	0.641956	0.341826
	Old Nevado	BAF970	17	0.0387	52.29	0.8051	21.67	1.0703	0.1203	22.85	0.0174	0.6055	99.4674	0.0162604	0.642123	0.341616
	Old Nevado	BAF970	10.26	0.042	53.52	0.7752	21.41	0.9514	0.1183	22.57	0	0.7178	100.136	0.0158558	0.64233	0.341815
	Old Nevado	BAF970	24.58	0	52.91	0.6558	21.74	1.3611	0.1676	22.92	0	0.6515	100.408	0.0132443	0.644055	0.342701
	Old Nevado	BAF970	19.52	0.039	53.33	0.7196	21.4	0.891	0.1672	22.82	0.0134	0.7029	100.101	0.0146335	0.645688	0.339679
	Old Nevado	BAF970	14.38	0.2918	54.61	0.3313	20.86	1.2079	0.1154	21.84	0	0.7425	100.508	0.0070487	0.646534	0.346418
	Old Nevado	BAF970	23.3	0.1485	56.32	0.4001	19.52	1.1986	0.1004	20.7	0	0.7	99.5832	0.0090035	0.648133	0.342863
	Old Nevado	BAF970	32.22	0.147	52.9	0.5821	21.26	1.2469	0.0994	22.84	0.0098	0.7786	100.134	0.0118903	0.649144	0.338966
	Old Nevado	BAF970	1	0.0369	53.39	0.8528	20.89	0.8769	0.1441	22.97	0	0.6494	99.8302	0.017362	0.650675	0.331963
	Old Nevado	BAF970	16.72	0	53.22	0.7492	21.22	1.1948	0.1537	23.26	0.0061	0.695	100.501	0.0150817	0.651496	0.333422
	Old Nevado	BAF970	9	0.0443	52.18	0.8529	21.1	1.1071	0.1442	23.33	0	0.6336	99.3977	0.0171321	0.652046	0.330821
	Old Nevado	BAF970	67.08	0.038	53.05	1.45	20.57	0.4804	0.1376	23.65	0.0356	0.6648	100.076	0.0287628	0.652747	0.31849
	Old Nevado	BAF970	46.3	0	53.12	0.7857	20.92	1.1319	0.1427	23.32	0.1228	0.6278	100.171	0.0158528	0.654681	0.329466
	Old Nevado	BAF970	1	0.0007	53.34	0.9813	20.69	0.6083	0.1154	23.74	0	0.6727	100.162	0.0195624	0.658494	0.321943
	Old Nevado	BAF970	53.85	0.026	53.03	0.8388	20.63	1.2424	0.1806	23.63	0.1607	0.6517	100.392	0.0168366	0.659948	0.323216
	Old Nevado	BAF970	5.46	2.66	58.31	1.74	11.17	9.03	0.1736	14.6	0.0117	0.4532	99.6286	0.0565429	0.660135	0.283322
	Old Nevado	BAF970	16.1	0.0188	53.31	0.8599	20.65	0.9888	0.1479	23.73	0.1134	0.6332	100.466	0.0171994	0.66041	0.322391
	Old Nevado	BAF970	38.75	0.0251	53.91	0.8713	20.15	0.8028	0.1088	24.23	0.0897	0.6344	100.823	0.0173176	0.670078	0.312604
	Old Nevado	BAF970	23.65	0.0217	53.27	1.0781	19.13	1.8507	0.2226	24.21	0.2621	0.4858	100.544	0.0216941	0.67784	0.300466
	Old Nevado	BAF970	31.2	0.0346	53.64	0.9618	19.24	1.1748	0.1839	24.69	0.1806	0.5715	100.677	0.0191087	0.682525	0.298366
	Old Nevado	BAF970	8.55	0.0451	53.76	0.9658	18.5	1.9	0.2124	24.63	0.3492	0.5336	100.907	0.019442	0.689872	0.290686
	Old Nevado	BAF970	1	1.5	54.82	1.3147	10.94	10.26	0.4236	15.84	0.0017	0.4056	95.819	0.0412214	0.691039	0.267739
	Old Nevado	BAF970	41.14	0.0989	53.03	0.432	19.13	1.1583	0.0968	24.87	0.0079	0.8822	100.002	0.00864556	0.692526	0.298829
	Old Nevado	BAF970	61.4	0.0698	53.65	1.0939	17.04	2.01	0.2234	25.67	0.2146	0.4328	100.408	0.0218293	0.712753	0.265418
	Old Nevado	BAF970	76.52	0.0668	53.89	1.2138	16.91	1.0628	0.143	26.31	0.129	0.4042	100.129	0.0237905	0.717509	0.258701
	Old Nevado	BAF970	36.68	0.0914	54.33	0.5372	16.93	0.8599	0.0973	26.62	0.0074	0.9491	100.582	0.0105767	0.729246	0.260178
	Old Nevado	BAF970	152.04	0.0229	53.27	1.2623	15.32	2.51	0.2412	27.2	0.2436	0.3225	100.402	0.0247189	0.741115	0.234166
	Old Nevado	BAF970	161.48	0.0508	53.23	1.3278	15.08	2.66	0.2792	26.97	0.2399	0.3181	100.159	0.0262285	0.741262	0.232509
	Old Nevado	BAF970	85.96	0.0451	54.19	1.51	14.96	1.4467	0.1883	27.38	0.1261	0.3855	100.232	0.0294442	0.742861	0.227695
	Old Nevado	BAF970	170.92	0.0483	53.62	1.3239	14.85	2.63	0.2556	26.99	0.2962	0.3404	100.354	0.0262321	0.744099	0.229669
	Old Nevado	BAF970	142.6	0.062	53.25	1.2257	15.13	2.35	0.201	27.32	0.2435	0.3003	100.091	0.0240106	0.744647	0.231343
	Old Nevado	BAF970	27.76	0.0704	54.03	0.7031	15.6	0.972	0.1074	27.34	0.0029	0.9481	99.8772	0.0138078	0.747064	0.239128
	Old Nevado	BAF970	218.12	0.0453	53.93	1.2512	14.83	2.35	0.234	27.26	0.3583	0.3096	100.57	0.0246512	0.747288	0.228061
	Old Nevado	BAF970	189.8	0.0024	53.61	1.2076	14.87	2.47	0.2643	27.3	0.342	0.3232	100.4	0.0237719	0.747747	0.228481
	Old Nevado	BAF970	180.36	0.0509	53.76	1.2055	14.87	2.39	0.2482	27.39	0.3448	0.3265	100.594	0.0236732	0.748398	0.227929
	Old Nevado	BAF970	199.24	0.0381	53.82	1.1509	14.78	2.46	0.2341	27.36	0.3092	0.2846	100.437	0.0226752	0.750032	0.227293
	Old Nevado	BAF970	208.68	0.0818	53.71	1.1348	14.76	2.41	0.2525	27.45	0.3485	0.2988	100.452	0.0223168	0.751115	0.226568
	Old Nevado	BAF970	95.4	0.036	54.14	1.2164	14.71	1.3098	0.1673	27.65	0.1925	0.2976	99.7206	0.0237716	0.751844	0.224384
	Old Nevado	BAF970	104.84	0.0538	54.32	1.1559	14.79	1.5362	0.2161	27.8	0.1836	0.3245	100.391	0.0224966	0.752824	0.22468
	Old Nevado	BAF970	114.28	0.0126	54.29	1.1608	14.82	1.4506	0.1622	27.99	0.186	0.3119	100.388	0.022464	0.753676	0.22386
	Old Nevado	BAF970	133.16	0.0366	54.07	1.1815	14.72	1.5265	0.1939	27.98	0.2024	0.3175	100.233	0.0228962	0.754447	0.222657
	Old Nevado	BAF970	123.72	0	54.33	1.1534	14.52	1.3835	0.1735	27.94	0.1882	0.3606	100.05	0.0224561	0.756887	0.220657
	Old Nevado	BAF970	227.56	0.0335	54.77	1.2043	14.33	1.1197	0.1606	28.19	0.1949	0.351	100.358	0.0233333	0.759953	0.216713
	Old Nevado	BAF970	1	0.0301	54.88	0.9147	14.22	1.0782	0.1532	27.48	0.0268	0.7157	99.5033	0.0182031	0.760912	0.220884
	Old Nevado	BAF970	76.5	0.0572	52.93	1.26	12.27	4.21	0.2214	26.26	0.1803	0.2513	97.6573	0.0265961	0.771246	0.202158
	Old Nevado	BAF970	68.95	0.0211	54.5	1.1808	12.85	2.31	0.1976	28.9	0.2178	0.2729	100.461	0.0229629	0.781985	0.195052
	Old Nevado	BAF970	84.05	0.0324	54.77	1.2498	12.16	2.17	0.1699	29.26	0.2264	0.2852	100.329	0.0242899	0.791244	0.184466
	Old Nevado	BAF970	18.84	0.0847	55.46	0.5734	12.77	0.9802	0.1528	29.24	0	0.9084	100.365	0.0111937	0.794224	0.194583
	Old Nevado	BAF970	106.7	0.079	55.02	1.62	11.12	2.11	0.0949	29.96	0.2262	0.2074	100.446	0.0311623	0.801876	0.166962
	Old Nevado	BAF970	91.6	0.0257	55.16	1.5	10.96	2.1	0.1385	30.16	0.2321	0.2212	100.501	0.0288355	0.806711	0.164454
	Old Nevado	BAF970	99.15	0.1124	55.32	1.65	10.59	2.1	0.1162	30.08	0.2503	0.1948	100.422	0.0318722	0.808458	0.15967
	Domes	Cerro Gordo	22.72	0.0279	52.06	0.6494	26.34	1.4726	0.1343	19.31	0.0302	0.6564	100.687	0.0135075	0.558853	0.42764
	Domes	Cerro Gordo	1	0.0622	53.33	0.8586	23.75	0.6328	0.0663	21.04	0	0.715	100.482	0.0176407	0.60148	0.380879
	Domes	Cerro Gordo	11.86	0.0473	53.06	0.6744	23.32	1.0404	0.1583	21.61	0	0.6513	100.563	0.0137788	0.614326	0.371895
	Domes	Cerro Gordo	33.58	0.0375	52.65	1.0638	22.24	1.8834	0.2051	21.92	0.2419	0.4887	100.734	0.0217446	0.623422	0.354833
	Domes	Cerro Gordo	55.3	0.0601	53.64	2.42	15.75	2.55	0.2783	25.16	0.29	0.3842	100.534	0.0486715	0.704078	0.247251
	Domes	Cerro Gordo	98.74	0.0913	52.91	1.55	15.97	3.58	0.2358	25.36	0.3055	0.2934	100.304	0.0314394	0.71572	0.25284
	Domes	Cerro Gordo	44.44	0.0352	54.11	1.58	15.46	2.06	0.2411	26.11	0.3456	0.3382	100.284	0.0316148	0.726927	0.241458
	Domes	Cerro Gordo	66.16	0.0656	55.02	1.59	15.47	1.1137	0.1594	26.77	0.1935	0.3398	100.727	0.0312299	0.731599	0.237171
	Domes	Cerro Gordo	77.02	0.0818	55.26	1.44	15.35	0.9783	0.1501	26.79	0.1524	0.3795	100.582	0.0284041	0.735262	0.236334
	Domes	Cerro Gordo	87.88	0.0313	55.14	1.47	15.21	0.8154	0.1265	26.79	0.1674	0.3442	100.095	0.0290413	0.736414	0.234545
	Recent Nevado	Crater 31	74.26	0.0134	50.57	0.6674	29.26	1.7329	0.13	17.09	0.0325	0.7639	100.274	0.0141144	0.502885	0.483001
	Recent Nevado	Crater 31	49.84	0.0605	49.69	0.5871	28.84	1.7107	0.1537	16.8	0.0257	0.756	98.6463	0.012633	0.502985	0.484382
	Recent Nevado	Crater 31	48.04	0.0339	51.85	0.6211	28.53	0.9199	0.0932	17.93	0.016	0.7069	100.711	0.0129835	0.521507	0.46551
	Recent Nevado	Crater 31	1	0.8349	56.07	0.8912	19.01	6.89	0.2335	12.91	0	0.4282	98.5479	0.0264511	0.533146	0.440402
	Recent Nevado	Crater 31	55.88	0.0552	52.06	0.5221	28.17	1.0139	0.0705	18.57	0.005	0.6857	101.157	0.0107987	0.534419	0.454783
	Recent Nevado	Crater 31	63.72	0.0181	52.06	0.538	27.72	1.144	0.1168	18.7	0.0162	0.6764	100.989	0.0111633	0.539885	0.448952
	Recent Nevado	Crater 31	40.2	0.0098	52.15	0.5689	27.84	1.0661	0.122	18.81	0	0.6799	101.254	0.0117368	0.53995	0.448313
	Recent Nevado	Crater 31	1	0	51.99	0.5443	27.35	1.1279	0.1005	18.72	0.0047	0.6419	100.492	0.011354	0.543333	0.445313
	Recent Nevado	Crater 31	8.84	0.0717	51.89	0.5823	27.26	1.1171	0.1571	18.74	0.0086	0.6544	100.491	0.0121478	0.543964	0.443888
	Recent Nevado	Crater 31	16.68	0.0206	51.98	0.5201	27.4	1.2725	0.1577	18.96	0.0003	0.6357	100.949	0.0107708	0.546324	0.442905
	Recent Nevado	Crater 31	71.56	0.0187	51.84	0.5968	27.08	1.1966	0.1133	18.89	0.0192	0.6458	100.409	0.0124288	0.547373	0.440198
	Recent Nevado	Crater 31	32.36	0.0671	52.11	0.5913	26.94	1.2373	0.1181	19.21	0.0078	0.6546	100.943	0.0122301	0.552841	0.434929
	Recent Nevado	Crater 31	24.52	0.0087	52.22	0.6093	27.01	1.0848	0.1293	19.29	0.0316	0.6586	101.057	0.0125546	0.553039	0.434406
	Recent Nevado	Crater 31	32.53	0.08	52.1	0.5007	26.78	0.5202	0.0577	19.31	0.0758	0.7486	100.18	0.0103726	0.556598	0.433029
	Recent Nevado	Crater 31	24.61	0	51.26	0.6607	25.85	1.3411	0.1173	19.15	0	0.6735	99.0534	0.0139144	0.561153	0.424933
	Recent Nevado	Crater 31	1	0.0636	51.15	0.4732	26.16	1.2541	0.1068	19.29	0.044	0.64	99.1817	0.00991362	0.562303	0.427783
	Recent Nevado	Crater 31	22.02	0.0237	51.79	0.4898	26.49	1.0154	0.1226	19.56	0.0517	0.62	100.165	0.0101236	0.562515	0.427361
	Recent Nevado	Crater 31	37.63	0.0364	52	0.5046	26.34	0.9266	0.0812	19.49	0.0487	0.6955	100.13	0.0104727	0.562825	0.426702
	Recent Nevado	Crater 31	27.56	0.0167	52.4	0.9145	25.97	1.0321	0.1713	19.61	0.0109	0.6765	100.811	0.0188671	0.562925	0.418208
	Recent Nevado	Crater 31	25.42	0.05	51.46	0.4867	26.1	1.2692	0.1069	19.49	0.0671	0.6001	99.6501	0.0101444	0.565233	0.424623
	Recent Nevado	Crater 31	32.48	0	51.4	0.6376	25.7	1.5497	0.1302	19.36	0.0177	0.6328	99.4369	0.0133851	0.565496	0.421119
	Recent Nevado	Crater 31	11.51	0.0553	51.95	0.4962	26.14	0.9551	0.0817	19.58	0.0553	0.6558	99.9787	0.0103067	0.565885	0.423808
	Recent Nevado	Crater 31	20.92	0.0522	52.66	0.9266	25.68	0.9289	0.1112	19.67	0.0082	0.6609	100.707	0.0191685	0.566175	0.414657
	Recent Nevado	Crater 31	86.47	0.0438	51.24	0.7453	25.74	1.6655	0.1853	19.57	0.042	0.6699	99.9068	0.0155057	0.566503	0.417991
	Recent Nevado	Crater 31	16.74	0.0048	51.71	0.6688	25.47	1.1348	0.1103	19.4	0	0.6714	99.1823	0.0140674	0.567769	0.418164
	Recent Nevado	Crater 31	14.28	0.0204	52.07	0.7221	25.74	1.5645	0.1411	19.74	0.0269	0.6309	100.664	0.0149567	0.568899	0.416144
	Recent Nevado	Crater 31	1	0.0625	52.08	0.7817	25.68	1.3991	0.155	19.81	0.0244	0.6591	100.66	0.0161543	0.569617	0.414229
	Recent Nevado	Crater 31	13.21	0.0485	52.21	0.568	25.76	1.1146	0.0703	19.84	0.0372	0.5893	100.266	0.0117647	0.571773	0.416462
	Recent Nevado	Crater 31	7.64	0.036	52.71	0.7569	25.68	0.6943	0.1192	20.11	0.0057	0.6357	100.755	0.0155159	0.573589	0.410895
	Recent Nevado	Crater 31	8.87	0	51.9	0.6549	25.18	0.983	0.0769	19.72	0.0014	0.6647	99.1925	0.0137159	0.574656	0.411628
	Recent Nevado	Crater 31	1	0	51.9	0.6626	24.98	1.0078	0.1299	19.65	0.0216	0.6204	98.9956	0.013949	0.57558	0.410471
	Recent Nevado	Crater 31	4.66	0.0156	52.57	0.7091	24.79	0.847	0.1134	20.04	0.0441	0.6367	99.7987	0.0147907	0.581606	0.403604
	Recent Nevado	Crater 31	1	0.107	51.91	0.7503	24.27	1.2384	0.1047	19.81	0.0878	0.5909	98.9089	0.0158768	0.583261	0.400863
	Recent Nevado	Crater 31	1	0.0344	52.85	0.7067	24.53	0.5158	0.075	20.6	0.0479	0.6287	100.001	0.0145663	0.590787	0.394647
	Recent Nevado	Crater 31	62.05	0.1211	51.79	1.0083	23.84	2.05	0.1622	20.4	0.0505	0.4987	99.9429	0.0210058	0.591331	0.387663
	Recent Nevado	Crater 31	30.28	0.0262	53.44	1.1834	19.55	2.07	0.2822	23.84	0.2032	0.418	101.027	0.0238522	0.66858	0.307568
	Recent Nevado	Crater 31	19.3	0.0745	53.24	1.0958	18.91	2.07	0.2807	23.99	0.2223	0.4153	100.313	0.0222563	0.677958	0.299786
	Recent Nevado	Crater 31	26.62	0.0853	53.3	1.2111	17.53	2.36	0.3222	24.75	0.1906	0.3778	100.141	0.0245504	0.69808	0.27737
	Recent Nevado	Crater 31	22.96	0.0675	53.69	1.2392	16.45	2.41	0.331	25.61	0.2003	0.3255	100.334	0.0249272	0.71679	0.258283
	Recent Nevado	Crater 31	8.32	0.0443	54.16	1.1196	16.47	1.83	0.1911	25.69	0.3822	0.3449	100.248	0.022518	0.718923	0.258559
	Recent Nevado	Crater 31	33.94	0.0744	54.79	1.4	15.98	1.1543	0.2162	26.44	0.1202	0.3346	100.54	0.0276343	0.726161	0.246204
	Recent Nevado	Crater 31	188.65	0.093	53.38	0.9897	15.83	2.84	0.1953	26.05	0.464	0.2832	100.132	0.019957	0.730887	0.249156
	Recent Nevado	Crater 31	29.5	0.047	54.07	1.59	14.89	2.23	0.1895	26.34	0.3226	0.3083	99.9875	0.0318882	0.735021	0.233091
	Recent Nevado	Crater 31	77	0.0661	54.02	1.2623	15.13	2.31	0.1774	26.52	0.2444	0.324	100.054	0.0252603	0.738413	0.236326
	Recent Nevado	Crater 31	67.5	0.006	54.16	1.3215	14.91	2.13	0.1889	26.43	0.2301	0.3438	99.7204	0.0265713	0.739425	0.234003
	Recent Nevado	Crater 31	15.64	0.0483	54.23	1.2728	15.06	2.31	0.3428	26.57	0.2044	0.2852	100.335	0.0254574	0.739429	0.235113
	Recent Nevado	Crater 31	58	0.045	54.26	1.2634	15.11	2.07	0.1763	26.73	0.201	0.309	100.17	0.0251426	0.740148	0.23471
	Recent Nevado	Crater 31	48.5	0.0952	54.36	1.3712	14.91	2.16	0.18	26.64	0.2383	0.3283	100.29	0.0273824	0.740212	0.232406
	Recent Nevado	Crater 31	39	0.0793	54.17	1.3379	14.88	2.14	0.2016	26.55	0.2104	0.3358	99.9051	0.0268148	0.740401	0.232784
	Recent Nevado	Crater 31	86.5	0.0332	55.28	1.3386	14.75	1.0734	0.1411	26.99	0.171	0.3063	100.094	0.0265567	0.745034	0.228409
	Recent Nevado	Crater 31	13	0.0542	55.1	0.6199	15.61	1.1069	0.1092	27.22	0.0663	0.3072	100.201	0.0122321	0.747342	0.240426
	Recent Nevado	Crater 31	167.8	0.083	54.07	1.1781	14.66	2.5	0.1421	26.86	0.415	0.2344	100.146	0.0235649	0.747551	0.228884
	Recent Nevado	Crater 31	9	0.0375	54.53	1.0871	14.97	1.7158	0.134	27.23	0.1196	0.3161	100.155	0.0214589	0.747888	0.230653
	Recent Nevado	Crater 31	1	0.0372	54.33	1.1653	14.54	2.11	0.1957	26.91	0.3024	0.3115	99.9135	0.0233261	0.749495	0.227178
	Recent Nevado	Crater 31	11.98	0.0227	54.37	1.2526	14.56	2.02	0.2919	27.19	0.2199	0.2877	100.232	0.0248288	0.749901	0.22527
	Recent Nevado	Crater 31	20	0.0604	54.41	1.3575	14.32	2.01	0.1784	27.03	0.3937	0.3024	100.072	0.0270718	0.750023	0.222905
	Recent Nevado	Crater 31	146.95	0.0664	53.68	1.1222	14.27	2.7	0.2701	26.95	0.8535	0.1989	100.111	0.0225528	0.753599	0.223848
	Recent Nevado	Crater 31	17	0.0372	55.06	0.5812	14.87	1.3375	0.0913	27.53	0.0792	0.2724	99.8742	0.0115105	0.758622	0.229868
	Recent Nevado	Crater 31	10.5	0.0556	54.75	1.1456	13.73	1.6231	0.178	27.71	0.3822	0.3087	99.8949	0.022722	0.764718	0.21256
	Recent Nevado	Crater 31	1	0.0439	55.45	1.2379	13.71	0.6556	0.123	28.19	0.2341	0.3436	99.9985	0.0241954	0.766643	0.209162
	Recent Nevado	Crater 31	110.89	0.0321	54.28	1.2718	13.25	2.51	0.231	28.1	0.0486	0.2786	100.006	0.0250787	0.770982	0.203939
	Recent Nevado	Crater 31	5	0.0346	55.72	1.1556	13.54	0.7533	0.1368	28.39	0.2528	0.326	100.31	0.0225589	0.771128	0.206313
	Recent Nevado	Crater 31	123.1	0.0314	54.41	1.1961	13.07	2.26	0.1842	28.28	0.0563	0.2766	99.7687	0.0235701	0.775397	0.201033
	Recent Nevado	Crater 31	232.99	0.0322	54.6	1.1389	13.02	2.29	0.2011	28.25	0.0542	0.2578	99.8494	0.0225041	0.776686	0.20081
	Recent Nevado	Crater 31	98.68	0.0449	54.01	1.1099	13.08	2.03	0.163	28.63	0.0531	0.2732	99.3941	0.0216968	0.778723	0.19958
	Recent Nevado	Crater 31	21.85	0.0253	55.3	1.074	13.03	1.6714	0.1758	28.7	0.4067	0.2636	100.653	0.0209857	0.780284	0.19873
	Recent Nevado	Crater 31	135.31	0.0891	53.67	1.16	12.71	2.78	0.1777	28.45	0.0937	0.2335	99.3757	0.0228951	0.781298	0.195807
	Recent Nevado	Crater 31	220.78	0.0407	54.3	1.1742	12.61	2.83	0.1712	28.32	0.0984	0.2582	99.8125	0.0232878	0.781503	0.195209
	Recent Nevado	Crater 31	208.57	0.0522	54.03	1.2471	12.26	3.22	0.1495	28.24	0.1211	0.2356	99.5556	0.0248874	0.784141	0.190971
	Recent Nevado	Crater 31	126.1	0.0628	54.95	1.1792	12.14	2.26	0.1815	28.95	0.4524	0.1911	100.376	0.0231506	0.790815	0.186034
	Recent Nevado	Crater 31	147.52	0.1058	54.59	1.3174	11.1	2.86	0.1312	28.97	0.2075	0.243	99.5249	0.026196	0.801523	0.172281
	Recent Nevado	Crater 31	21	0.017	55.38	0.2576	12.19	2	0.052	29.54	0.1933	0.2133	99.8534	0.00506346	0.80791	0.187027
	Recent Nevado	Crater 31	196.36	0.0607	54.78	1.3082	10.3	3.16	0.109	29.4	0.2835	0.1755	99.5855	0.0260313	0.813992	0.159977
	Recent Nevado	Crater 31	43.04	0.0995	55.62	1.3632	10.43	1.7866	0.0933	30.31	0.1719	0.2026	100.079	0.026379	0.816085	0.157536
	Recent Nevado	Crater 31	159.73	0.0503	54.6	1.3217	10.15	3.14	0.0993	29.64	0.2957	0.1932	99.4952	0.0261799	0.816892	0.156928
	Recent Nevado	Crater 31	171.94	0.0923	54.8	1.3217	10.05	3.02	0.1132	29.59	0.2984	0.209	99.5041	0.0262567	0.817906	0.155837
	Recent Nevado	Crater 31	184.15	0.0765	54.65	1.3293	10	3.03	0.1091	29.77	0.3082	0.1954	99.4774	0.0262933	0.819316	0.15439
	Recent Nevado	Crater 31	105.25	0.0918	55.21	1.313	10.08	2.37	0.1072	30.15	0.4806	0.195	100.004	0.0256789	0.820445	0.153876
	Recent Nevado	Crater 31	95.59	0.1003	54.96	1.2677	9.87	3.12	0.1254	30.25	0.3256	0.205	100.232	0.024827	0.824296	0.150877
	Recent Nevado	Crater 31	85.08	0.0786	54.71	1.2859	9.67	3.08	0.1133	30.06	0.3733	0.1857	99.5599	0.0253834	0.825623	0.148993
	Recent Nevado	Crater 31	74.57	0.0886	54.72	1.3322	9.56	3.11	0.1152	30.1	0.4095	0.1957	99.6401	0.026289	0.826459	0.147252
	Recent Nevado	Crater 31	64.06	0.0656	54.63	1.3542	9.5	3.02	0.0909	30.11	0.438	0.1852	99.4011	0.0267289	0.826912	0.146359
	Recent Nevado	Crater 31	42.7	0.0695	55.31	1.3466	9.6	2.66	0.1321	30.38	0.4701	0.2119	100.181	0.0263469	0.827044	0.146609
	Recent Nevado	Crater 31	53.55	0.0941	55.41	1.3358	9.51	1.92	0.0558	30.61	0.2763	0.1867	99.3988	0.0260139	0.829428	0.144558
	Recent Nevado	Crater 31	63.55	0.0845	55.48	1.3638	9.05	2.59	0.1449	30.73	0.5132	0.2028	100.164	0.0266443	0.835349	0.138007
	Recent Nevado	Crater 31	57	0.0522	55.73	0.1941	10.51	2.37	0.0328	30.64	0.1991	0.1965	99.9321	0.00380364	0.835437	0.160759
	Recent Nevado	Crater 31	84.4	0.0605	55.55	1.3546	9.02	2.47	0.1316	30.87	0.5316	0.1897	100.185	0.026381	0.836504	0.137115
	Recent Nevado	Crater 31	25	0.0434	55.83	0.1824	10.18	2.3	0.0606	31.04	0.2008	0.1916	100.04	0.00355436	0.841606	0.15484
	Recent Nevado	Crater 31	45	0.0151	55.97	0.2005	10	2.2	0.0509	31.13	0.2709	0.205	100.049	0.00390685	0.844	0.152093
	Recent Nevado	Crater 31	29	0.0415	56.04	0.2036	10.02	2.24	0.0601	31.29	0.2194	0.1984	100.321	0.00394869	0.844367	0.151684
	Recent Nevado	Crater 31	41	0.059	56.1	0.2485	9.91	1.8491	0.0352	31.17	0.1934	0.1899	99.7612	0.004839	0.844534	0.150627
	Recent Nevado	Crater 31	37	0.0353	55.66	0.1985	10.06	2.06	0.0805	31.5	0.2122	0.1885	100.006	0.00382615	0.844818	0.151356
	Recent Nevado	Crater 31	49	0.0475	55.9	0.1736	9.95	2.48	0.0789	31.1	0.2203	0.1951	100.146	0.0033898	0.844959	0.151651
	Recent Nevado	Crater 31	53	0.0707	55.73	0.1713	9.92	2.42	0.0565	31.01	0.2131	0.165	99.7676	0.00335478	0.845004	0.151641
	Recent Nevado	Crater 31	33	0.0406	56.04	0.175	9.96	2.32	0.0437	31.2	0.251	0.1826	100.213	0.00340727	0.845228	0.151365
	Recent Nevado	Crater U25	54.76	0	51.79	0.8002	26.64	1.1009	0.1996	19.54	0	0.7144	100.794	0.0164037	0.557336	0.42626
	Recent Nevado	Crater U25	61.48	0.0353	52.19	0.7846	26.59	0.9477	0.2226	19.63	0	0.7243	101.128	0.0160606	0.559094	0.424845
	Recent Nevado	Crater U25	48.04	0.0044	52.2	0.8032	26.05	0.7644	0.1294	19.95	0.0005	0.7319	100.634	0.0164271	0.567716	0.415857
	Recent Nevado	Crater U25	27.88	0.0378	52.52	0.5885	26.32	0.8459	0.1202	20.02	0.0114	0.7418	101.207	0.0120131	0.568622	0.419365
	Recent Nevado	Crater U25	21.16	0	52.37	0.5889	25.97	0.9477	0.1477	20.39	0.012	0.7212	101.151	0.0119622	0.576283	0.411754
	Recent Nevado	Crater U25	159.08	0.0145	48.42	0.1704	24.49	6.21	0.2694	18.91	0.0791	0.2624	98.8259	0.00373707	0.577037	0.419226
	Recent Nevado	Crater U25	17.68	0.0166	52.08	0.814	25.46	1.3254	0.1934	20.34	0.0004	0.7233	100.953	0.0166164	0.577717	0.405667
	Recent Nevado	Crater U25	14.44	0	52.44	0.5769	26	0.9964	0.1099	20.53	0.0153	0.6906	101.361	0.0116695	0.57782	0.410511
	Recent Nevado	Crater U25	41.32	0.0117	52.74	0.8006	25.38	0.8385	0.1138	20.45	0	0.7102	101.045	0.0163172	0.579927	0.403756
	Recent Nevado	Crater U25	34.36	0.0266	52.54	1.0658	24.71	0.974	0.2201	20.52	0.0061	0.6873	100.794	0.0217935	0.58382	0.394386
	Recent Nevado	Crater U25	30.19	0.0404	52.23	0.9358	24.86	1.0353	0.224	20.58	0.0142	0.6802	100.603	0.0191077	0.584684	0.396209
	Recent Nevado	Crater U25	34.6	0.0282	52.65	0.7544	25.21	0.827	0.1546	20.7	0	0.6918	101.022	0.0153228	0.585002	0.399675
	Recent Nevado	Crater U25	13.51	0.0403	52.58	0.7136	25.21	0.8599	0.1095	20.66	0.0072	0.7097	100.9	0.0145225	0.585018	0.40046
	Recent Nevado	Crater U25	150.76	0.0072	48.31	0.2037	24.05	6.34	0.2758	19.28	0.088	0.2734	98.8419	0.00444741	0.585698	0.409854
	Recent Nevado	Crater U25	7.72	0.0165	52.52	0.6498	25.34	1.037	0.1392	20.77	0.0165	0.6923	101.181	0.013173	0.585858	0.400969
	Recent Nevado	Crater U25	26.02	0.045	51.84	0.8851	24.41	1.0715	0.1694	20.36	0.0193	0.6637	99.4877	0.0183376	0.586919	0.394744
	Recent Nevado	Crater U25	21.85	0	52.02	0.79	24.94	1.3642	0.162	20.75	0.0134	0.7131	100.755	0.0160803	0.587675	0.396244
	Recent Nevado	Crater U25	38.53	0.0206	52.15	0.9957	24.67	0.997	0.2175	20.94	0	0.6927	100.684	0.0201609	0.589942	0.389897
	Recent Nevado	Crater U25	9.34	0.0411	52.41	0.8492	24.74	0.8627	0.1803	20.85	0.0128	0.7019	100.655	0.0172705	0.59	0.392729
	Recent Nevado	Crater U25	52.8	0.0528	51.9	1.102	24.22	0.999	0.1841	20.83	0.0084	0.7408	100.061	0.0224946	0.591611	0.385894
	Recent Nevado	Crater U25	17.34	0.0024	53.01	0.5822	25.29	0.5268	0.0645	21.16	0.0383	0.7218	101.399	0.0116992	0.59163	0.396671
	Recent Nevado	Crater U25	9.17	0.0549	52.32	1.3203	24.24	0.8979	0.152	21.21	0	0.683	100.892	0.0265375	0.59317	0.380293
	Recent Nevado	Crater U25	1	0.0314	53.03	0.7224	24.77	0.8836	0.1408	21.28	0.0158	0.6976	101.59	0.0145453	0.596167	0.389287
	Recent Nevado	Crater U25	10.42	0.0017	52.24	0.8154	24.24	1.1511	0.2151	21.13	0	0.7493	100.549	0.0165947	0.598343	0.385062
	Recent Nevado	Crater U25	25.51	0.0326	53.06	0.5969	24.8	0.4532	0.1047	21.5	0.0047	0.7217	101.28	0.0119692	0.599867	0.388164
	Recent Nevado	Crater U25	1	0.0091	53.02	1.45	23.03	0.3428	0.1222	20.97	0.0219	0.6862	99.668	0.0298332	0.600318	0.369849
	Recent Nevado	Crater U25	142.44	0.0012	48.55	0.2173	23.4	6.24	0.2884	20.01	0.0796	0.2593	99.0461	0.00469088	0.601025	0.394284
	Recent Nevado	Crater U25	1	0.0384	51.7	0.8648	24.11	1.2519	0.158	21.46	0	0.6856	100.281	0.0174555	0.602694	0.37985
	Recent Nevado	Crater U25	33.68	0	53.32	0.5788	24.75	0.3965	0.1675	21.7	0	0.7063	101.623	0.0115551	0.602774	0.385671
	Recent Nevado	Crater U25	18.84	0.0093	52.19	1.51	23.44	0.9425	0.2286	21.7	0.0177	0.686	100.731	0.0302004	0.603875	0.365925
	Recent Nevado	Crater U25	1	0.0115	53.38	0.8834	24	0.3737	0.1208	21.52	0.0066	0.6939	100.994	0.0178251	0.604182	0.377993
	Recent Nevado	Crater U25	29.26	0.0263	52.35	0.8282	23.81	1.0398	0.1439	21.39	0.0179	0.6579	100.264	0.0168419	0.605226	0.377932
	Recent Nevado	Crater U25	15.8	0.0577	51.45	1.3042	23.5	0.4905	0.1636	21.69	0.0113	0.7745	99.4477	0.0261749	0.605691	0.368135
	Recent Nevado	Crater U25	1	0.0515	52.99	0.8138	23.56	0.3492	0.1087	21.21	0.0254	0.7395	99.8609	0.0167053	0.6058	0.377495
	Recent Nevado	Crater U25	5.17	0.0041	52.01	0.8096	23.43	0.8961	0.1349	21.23	0.0029	0.716	99.2473	0.0166457	0.607341	0.376013
	Recent Nevado	Crater U25	7.88	0.0471	51.81	0.9742	23.63	1.2789	0.218	21.6	0.0078	0.6216	100.193	0.0196917	0.60749	0.372818
	Recent Nevado	Crater U25	1	0.0203	53.26	0.981	23.2	0.4711	0.1155	21.24	0.0026	0.7018	100.01	0.0201674	0.607555	0.372277
	Recent Nevado	Crater U25	1	0.0392	52.58	0.8544	23.69	1.1432	0.1557	21.55	0.0009	0.6868	100.712	0.01732	0.607835	0.374845
	Recent Nevado	Crater U25	11.39	0.1323	52.37	0.9275	23.37	1.4787	0.5377	21.38	0.0096	0.6366	100.895	0.0189607	0.608134	0.372905
	Recent Nevado	Crater U25	19.84	0	52.58	0.8443	23.62	1.2471	0.1764	21.51	0	0.6816	100.659	0.0171572	0.608191	0.374651
	Recent Nevado	Crater U25	22.6	0.0334	52.47	0.8259	23.25	1.3454	0.1913	21.28	0.0145	0.6909	100.126	0.0169999	0.609456	0.373544
	Recent Nevado	Crater U25	9.32	0.0556	52.95	0.8942	23.63	0.658	0.1155	21.76	0.007	0.7006	100.775	0.0180227	0.610231	0.371746
	Recent Nevado	Crater U25	8.65	0.0628	52.78	0.8313	23.46	0.5885	0.1289	21.54	0.0217	0.7098	100.131	0.0169261	0.610232	0.372842
	Recent Nevado	Crater U25	38	0.0795	51.8	0.9843	23.37	1.0238	0.1539	21.67	0	0.6807	99.7707	0.0199343	0.610637	0.369429
	Recent Nevado	Crater U25	32.17	0.0107	52.58	0.813	23.71	1.1407	0.1526	21.84	0	0.6858	100.933	0.0163556	0.611334	0.37231
	Recent Nevado	Crater U25	1	0.0074	52.52	0.8659	23.04	1.2149	0.1906	21.38	0.019	0.7022	99.9514	0.0178177	0.612129	0.370054
	Recent Nevado	Crater U25	1	0.0529	52.95	0.817	23.56	0.7927	0.138	21.79	0	0.6179	100.732	0.0164967	0.612184	0.371319
	Recent Nevado	Crater U25	14.38	0.0133	52.16	1.1442	23.25	1.0312	0.2427	21.92	0.0223	0.6805	100.473	0.0229799	0.612545	0.364475
	Recent Nevado	Crater U25	1	0.015	52.06	1.3564	23.04	0.846	0.134	21.98	0.0271	0.6421	100.113	0.0271698	0.6126	0.36023
	Recent Nevado	Crater U25	45.4	0.0064	51.94	0.8749	23.39	0.9173	0.1893	21.78	0.0113	0.716	99.8363	0.0176975	0.613001	0.369301
	Recent Nevado	Crater U25	1	0.0465	52.95	0.8434	23.45	0.8368	0.176	21.89	0.0034	0.6544	100.869	0.0170024	0.614006	0.368992
	Recent Nevado	Crater U25	9.92	0.0331	52.43	1.097	23.21	0.9766	0.1914	21.99	0.0191	0.629	100.585	0.0220236	0.614267	0.363709
	Recent Nevado	Crater U25	8.4	0.0055	53.53	0.8902	22.94	0.4223	0.14	21.55	0	0.7432	100.24	0.0182491	0.614684	0.367067
	Recent Nevado	Crater U25	34.28	0.0207	52.92	0.7857	23.51	0.5615	0.0611	21.96	0	0.629	100.453	0.0158116	0.614897	0.369292
	Recent Nevado	Crater U25	30.6	0.0072	52.43	0.893	23.44	0.4103	0.1026	22.03	0	0.6988	100.03	0.0179168	0.614999	0.367084
	Recent Nevado	Crater U25	21.64	0.0255	51.85	0.9178	23.35	1.3203	0.19	22.03	0.0177	0.6404	100.36	0.0184312	0.615561	0.366008
	Recent Nevado	Crater U25	17.64	0.0093	53.33	0.746	23.59	0.4232	0.066	22.08	0.011	0.6666	100.922	0.0149556	0.615905	0.369139
	Recent Nevado	Crater U25	12.12	0.0145	53.14	0.8862	23.33	0.4987	0.1058	22.06	0.0002	0.6715	100.713	0.0177986	0.616467	0.365735
	Recent Nevado	Crater U25	1	0.0154	52.95	0.9315	23.12	0.8381	0.1442	21.95	0.0297	0.6505	100.643	0.018811	0.616758	0.364431
	Recent Nevado	Crater U25	1	0.0074	51.9	0.803	22.94	0.739	0.1473	21.71	0	0.6675	98.9251	0.0164159	0.617533	0.366051
	Recent Nevado	Crater U25	1	0.0045	52.61	0.9401	22.98	0.8619	0.1485	21.91	0.0271	0.6181	100.116	0.0190448	0.617584	0.363372
	Recent Nevado	Crater U25	23.24	0.0135	53.2	0.963	23.17	0.7394	0.1162	22.13	0.0099	0.6709	101.013	0.0193219	0.617811	0.362867
	Recent Nevado	Crater U25	14.76	0	52.44	1.0152	22.95	0.947	0.1792	22	0.0282	0.609	100.177	0.0204928	0.617906	0.361601
	Recent Nevado	Crater U25	42.56	0.0097	53.03	0.8372	23.27	0.7458	0.1393	22.09	0.0229	0.6762	100.821	0.0168327	0.617976	0.365191
	Recent Nevado	Crater U25	25.96	0.0038	53.29	0.6398	23.62	0.3759	0.077	22.19	0	0.6645	100.861	0.0128085	0.618103	0.369089
	Recent Nevado	Crater U25	23.2	0.0205	52.43	0.8893	23.25	0.4257	0.094	22.15	0.0159	0.6917	99.9811	0.0178372	0.618164	0.363999
	Recent Nevado	Crater U25	50.92	0.0113	52.56	1.84	22.13	0.5381	0.1552	22.28	0.0134	0.6512	100.179	0.0367164	0.618598	0.344685
	Recent Nevado	Crater U25	38.68	0.0154	52.97	0.862	23.01	0.9618	0.134	22.04	0.0161	0.6643	100.682	0.0174181	0.619664	0.362918
	Recent Nevado	Crater U25	5.46	0.0178	52.49	0.9001	23.12	0.9376	0.1467	22.2	0.0291	0.6201	100.477	0.0180615	0.619821	0.362117
	Recent Nevado	Crater U25	46.9	0.0646	52.28	1.0985	22.67	0.304	0.7371	22.05	0	0.6655	99.8791	0.0222037	0.620133	0.357664
	Recent Nevado	Crater U25	4.9	0.0244	53	0.9074	22.96	0.8512	0.1315	22.11	0.028	0.6459	100.665	0.0182971	0.620331	0.361372
	Recent Nevado	Crater U25	134.12	0.0042	49.25	0.2515	22.54	5.33	0.3	20.97	0.113	0.2864	99.0452	0.00534849	0.620501	0.37415
	Recent Nevado	Crater U25	11.8	0.0484	52.73	0.8795	22.63	1.2243	0.1316	21.84	0.0215	0.5389	100.062	0.0179742	0.621035	0.36099
	Recent Nevado	Crater U25	34.36	0.0159	52.92	0.9996	22.96	0.8651	0.12	22.29	0.0073	0.6237	100.802	0.020018	0.62109	0.358892
	Recent Nevado	Crater U25	23.3	0.0187	53.22	1.0172	22.92	0.5036	0.1432	22.32	0.0158	0.6904	100.858	0.020359	0.621576	0.358065
	Recent Nevado	Crater U25	21.78	0.0062	53.05	0.8191	23.08	0.7934	0.1547	22.32	0.0027	0.6535	100.88	0.0164181	0.622488	0.361094
	Recent Nevado	Crater U25	42.6	0.0166	53.18	0.8162	23.06	0.5769	0.1174	22.31	0.0107	0.6674	100.755	0.0163706	0.622614	0.361016
	Recent Nevado	Crater U25	16.3	0	53.12	0.9367	22.57	0.4417	0.101	22	0.0057	0.7084	99.89	0.0190524	0.62262	0.358327
	Recent Nevado	Crater U25	8.8	0.0253	52.93	0.9606	22.85	0.8764	0.1034	22.38	0.0189	0.6187	100.77	0.0192368	0.623593	0.35717
	Recent Nevado	Crater U25	54.55	0.0298	52.82	0.9507	22.63	0.4431	0.1267	22.23	0.0015	0.6911	99.9262	0.0191885	0.624294	0.356518
	Recent Nevado	Crater U25	27.76	0.026	53.17	0.9622	22.93	0.5815	0.1401	22.54	0.0217	0.677	101.049	0.0191589	0.624467	0.356375
	Recent Nevado	Crater U25	23.95	0.0028	53.02	1.1253	22.32	0.3889	0.0961	22.2	0.0181	0.6914	99.8649	0.0227627	0.624827	0.35241
	Recent Nevado	Crater U25	32.22	0.0163	53.33	0.9787	22.83	0.4845	0.112	22.57	0	0.661	100.994	0.0194951	0.625544	0.35496
	Recent Nevado	Crater U25	6.4	0.0149	52.69	0.8053	22.33	1.1421	0.1243	21.98	0.013	0.6074	99.7282	0.016496	0.62647	0.357034
	Recent Nevado	Crater U25	6.81	0.0007	52.93	1.0222	22.32	0.8348	0.1507	22.4	0	0.58	100.256	0.0206042	0.62823	0.351166
	Recent Nevado	Crater U25	39.25	0.046	53.48	0.8602	22.55	0.3802	0.1071	22.47	0	0.7201	100.614	0.0172987	0.628737	0.353965
	Recent Nevado	Crater U25	17.2	0.067	52.4	0.7611	22.39	1.2871	0.1538	22.3	0.0283	0.6089	100.002	0.0154489	0.629813	0.354738
	Recent Nevado	Crater U25	12.7	0.0435	53.25	1.1109	22.16	0.7693	0.1599	22.52	0.1194	0.6013	100.738	0.0223332	0.629935	0.347732
	Recent Nevado	Crater U25	45.48	0.0408	53.23	0.9518	22.48	0.8353	0.1439	22.64	0.0192	0.652	100.996	0.0190361	0.630028	0.350936
	Recent Nevado	Crater U25	31.6	0.0262	53.08	0.8132	22.35	0.374	0.0985	22.38	0.0037	0.6961	99.8304	0.0164623	0.630381	0.353157
	Recent Nevado	Crater U25	177.63	0.0387	52.22	0.9077	21.82	1.8452	0.1735	22.98	0.0714	0.3227	100.379	0.0181855	0.640594	0.34122
	Recent Nevado	Crater U25	16.6	0.018	53.21	1.0139	21.64	0.9266	0.1937	22.95	0.0829	0.5991	100.638	0.0203441	0.640734	0.338922
	Recent Nevado	Crater U25	167.24	0.021	52.25	0.9161	21.67	1.8517	0.138	23.06	0.0761	0.3509	100.337	0.0183528	0.64279	0.338857
	Recent Nevado	Crater U25	188.02	0.0019	52.29	0.8982	21.42	1.93	0.1915	23.21	0.0478	0.3488	100.343	0.0179957	0.647028	0.334977
	Recent Nevado	Crater U25	56.6	0	53.51	0.9929	21.33	0.7358	0.1449	23.48	0.0076	0.593	100.794	0.0197349	0.649349	0.330916
	Recent Nevado	Crater U25	156.85	0.0051	52.6	0.8857	21.15	1.8222	0.1659	23.3	0.0457	0.3373	100.316	0.0177802	0.650815	0.331405
	Recent Nevado	Crater U25	12.62	0.0128	53.29	0.9682	21	0.8758	0.1738	23.37	0.0734	0.5823	100.352	0.0194119	0.651948	0.32864
	Recent Nevado	Crater U25	125.8	0.0051	52.14	0.5204	20.97	2.12	0.2448	22.77	0.0909	0.3882	99.2494	0.0107143	0.65229	0.336995
	Recent Nevado	Crater U25	59.24	0.0424	53.59	1.0156	21.16	0.6951	0.1768	23.76	0	0.5902	101.03	0.0200745	0.653461	0.326465
	Recent Nevado	Crater U25	198.41	0.0502	52.2	0.8558	21.13	1.884	0.1578	23.79	0.0707	0.3531	100.492	0.0169633	0.656121	0.326916
	Recent Nevado	Crater U25	20.5	0.0173	53.35	1.0267	20.4	1.1939	0.1296	23.73	0.2922	0.5931	100.737	0.0205473	0.660784	0.318669
	Recent Nevado	Crater U25	67.56	0	53.81	1.0713	20.12	0.7631	0.1466	24.25	0.0021	0.5009	100.672	0.0212066	0.667918	0.310876
	Recent Nevado	Crater U25	146.46	0.0037	52.93	1.0112	19.98	1.4309	0.2106	24.22	0.0694	0.3209	100.18	0.0201009	0.669891	0.310008
	Recent Nevado	Crater U25	117.48	0.0147	53.1	0.7038	20.13	0.8358	0.0578	24.11	0.0373	0.4199	99.4146	0.0140865	0.671432	0.314482
	Recent Nevado	Crater U25	67.72	0.0236	53.8	0.9923	19.84	0.6322	0.1306	24.55	0.0607	0.5572	100.594	0.0195963	0.67458	0.305824
	Recent Nevado	Crater U25	18.43	0.0315	53.14	1.091	19.47	1.4384	0.1331	24.44	0.2692	0.5183	100.55	0.0216925	0.67614	0.302168
	Recent Nevado	Crater U25	219.19	0.0264	53.13	0.6329	19.64	1.5051	0.1072	24.94	0.0875	0.4255	100.507	0.012492	0.684929	0.302579
	Recent Nevado	Crater U25	109.16	0.0034	53.39	0.647	19.12	0.8389	0.0666	24.57	0.0384	0.4517	99.1308	0.013003	0.687062	0.299934
	Recent Nevado	Crater U25	136.07	0.0582	53.54	1.0304	18.36	1.178	0.1181	25.64	0.1827	0.3648	100.472	0.0201894	0.699016	0.280795
	Recent Nevado	Crater U25	24.4	0	53.3	1.0401	18.04	1.8813	0.1315	25.32	0.5891	0.4716	100.78	0.0206569	0.699687	0.279656
	Recent Nevado	Crater U25	208.8	0.0431	53.35	0.9013	18.4	1.266	0.142	25.56	0.079	0.3586	100.113	0.0177325	0.699703	0.282565
	Recent Nevado	Crater U25	75.88	0.0186	54.19	1.1599	18.12	0.8353	0.1683	25.67	0.0402	0.3943	100.604	0.022734	0.700054	0.277212
	Recent Nevado	Crater U25	302.31	0.0029	53.23	1.1369	18.05	1.7769	0.1898	25.54	0.0676	0.3432	100.339	0.0223967	0.700056	0.277547
	Recent Nevado	Crater U25	125.68	0.0067	53.37	1.0576	18.08	1.4504	0.1886	25.68	0.2642	0.3291	100.434	0.0207776	0.701973	0.27725
	Recent Nevado	Crater U25	100.84	0.0077	53.4	0.6843	18.22	0.8269	0.0592	25.41	0.079	0.4612	99.1483	0.0136149	0.703433	0.282953
	Recent Nevado	Crater U25	24.24	0.017	53.14	1.0545	17.7	2.09	0.1478	25.49	0.2994	0.47	100.416	0.0209489	0.704587	0.274464
	Recent Nevado	Crater U25	92.52	0	54.35	1.0025	17.99	1.0648	0.1745	25.99	0.0716	0.4233	101.067	0.0195774	0.706201	0.274221
	Recent Nevado	Crater U25	84.2	0	54.32	1.2498	17.38	0.9397	0.1153	26.37	0.0853	0.3225	100.782	0.0242648	0.712355	0.26338
	Recent Nevado	Crater U25	73.73	0	53.92	1.0591	17.48	1.5445	0.1685	26.31	0.0687	0.3764	100.927	0.0206409	0.713451	0.265908
	Recent Nevado	Crater U25	239.97	0.0634	53.9	0.9436	17.07	1.5982	0.1872	26.43	0.1811	0.3617	100.735	0.0184867	0.720476	0.261038
	Recent Nevado	Crater U25	115.29	0.0205	53.94	1.085	16.76	1.5174	0.1569	26.73	0.4155	0.323	100.948	0.0211258	0.724158	0.254716
	Recent Nevado	Crater U25	291.92	0.055	54.14	0.966	16.64	1.177	0.1165	26.7	0.1666	0.3092	100.276	0.0189024	0.726946	0.254151
	Recent Nevado	Crater U25	229.58	0.0348	54.19	0.8853	16.87	1.2192	0.129	26.98	0.1467	0.3619	100.817	0.0171593	0.727616	0.255225
	Recent Nevado	Crater U25	84.12	0.0172	54.01	1.021	16.61	1.1713	0.1327	26.88	0.234	0.3531	100.434	0.019869	0.727831	0.2523
	Recent Nevado	Crater U25	63.34	0.0068	54	1.0856	16.44	1.5761	0.1943	26.81	0.1389	0.3715	100.623	0.0211944	0.728281	0.250525
	Recent Nevado	Crater U25	52.95	0	53.86	1.0404	16.4	1.5725	0.1662	26.88	0.41	0.3422	100.671	0.0203036	0.729883	0.249813
	Recent Nevado	Crater U25	281.53	0.0669	54.37	1.0531	16.2	1.1326	0.1348	27.13	0.1118	0.3279	100.535	0.0204698	0.733744	0.245786
	Recent Nevado	Crater U25	104.9	0.0759	54.3	1.0868	16.06	1.1191	0.1292	27.31	0.2874	0.3313	100.7	0.0210533	0.73611	0.242837
	Recent Nevado	Crater U25	250.36	0.0293	53.96	0.9154	16.15	1.5773	0.167	27.21	0.1726	0.3391	100.521	0.0178159	0.736845	0.245339
	Recent Nevado	Crater U25	48.1	0.0146	53.79	0.9347	15.95	1.6656	0.1794	27.01	0.3285	0.3457	100.219	0.0183397	0.737386	0.244275
	Recent Nevado	Crater U25	94.51	0.0367	53.87	1.1001	15.78	1.5346	0.1137	27.09	0.4202	0.3175	100.263	0.0215241	0.737486	0.24099
	Recent Nevado	Crater U25	78.84	0.0609	54.32	1.18	15.61	1.6855	0.1661	27.34	0.2356	0.3511	100.952	0.0229549	0.74002	0.237025
	Recent Nevado	Crater U25	66.94	0.0316	54.16	0.9945	15.77	1.7249	0.1938	27.23	0.2327	0.3249	100.668	0.0194271	0.740119	0.240454
	Recent Nevado	Crater U25	271.14	0.0318	54.38	0.9843	15.9	1.2295	0.1653	27.48	0.1196	0.2965	100.594	0.0190643	0.740561	0.240375
	Recent Nevado	Crater U25	260.75	0.0389	54.23	0.9352	15.72	1.3806	0.1242	27.39	0.1611	0.2981	100.278	0.0182244	0.742664	0.239111
	Recent Nevado	Crater U25	57.52	0.0362	54.26	1.0256	15.56	1.7569	0.1579	27.5	0.2708	0.3135	100.888	0.01994	0.743928	0.236132
	Recent Nevado	Crater U25	28.3	0.0403	53.57	1.3029	14.61	3.03	0.1189	27.18	0.5687	0.3435	100.778	0.0257873	0.748506	0.225706
	Recent Nevado	Crater U25	30.05	0	53.95	1.0702	14.95	2.07	0.1051	27.44	0.4034	0.3924	100.383	0.0210176	0.749813	0.22917
	Recent Nevado	Crater U25	76.36	0	54.37	1.0304	14.79	1.4364	0.1693	27.89	0.218	0.342	100.248	0.0200542	0.755265	0.224681
	Recent Nevado	Crater U25	85.78	0.0265	54.67	1.2776	14.16	1.4661	0.2008	28.14	0.1602	0.3244	100.425	0.0248155	0.760506	0.214679
	Recent Nevado	Crater U25	89.96	0.0294	54.9	1.1715	13.43	1.5489	0.155	29	0.2336	0.287	100.772	0.0225268	0.775901	0.201573
	Recent Nevado	Crater U25	51.7	0.0072	54.28	1.2409	11.06	3.09	0.1073	29.68	0.7796	0.2164	100.467	0.0242504	0.807042	0.168708
	Recent Nevado	Crater U25	101.08	0.0054	55.57	1.2958	11.12	1.8245	0.1043	30.59	0.2899	0.2052	101.007	0.0246639	0.81013	0.165207
	Recent Nevado	Crater U25	32.2	0.0451	55.05	1.1859	10.63	2.46	0.1049	30.54	0.601	0.2185	100.843	0.0228161	0.81755	0.159634
	Recent Nevado	Crater U25	35.86	0.0282	54.88	1.1338	10.48	2.4	0.0962	30.71	0.5294	0.2254	100.483	0.0217855	0.821037	0.157178
	Recent Nevado	Crater U25	55.6	0.0577	54.7	1.94	8.78	3.56	0.1389	30.68	0.3347	0.1804	100.372	0.0376836	0.829196	0.13312
	Recent Nevado	Crater U25	112.2	0.0472	56.2	1.48	9.05	1.5646	0.0417	31.74	0.3137	0.1893	100.63	0.0280798	0.837897	0.134023
	Recent Nevado	Crater U25	82.34	0.0192	55.91	1.254	8.86	2.08	0.0631	31.78	0.4829	0.1775	100.63	0.0239367	0.844056	0.132007
	Recent Nevado	Crater U25	47.8	0.0844	55	1.46	8.07	3.26	0.0967	31.91	0.7209	0.1488	100.751	0.0279916	0.851242	0.120767
	Recent Nevado	Crater U25	123.32	0.0502	56.26	1.41	8.17	1.5351	0.0594	32.63	0.3742	0.1859	100.68	0.0265096	0.853595	0.119896
	Recent Nevado	Crater U25	36.1	0.0317	56.18	1.68	7.69	1.8877	0.0892	32.27	0.6438	0.1831	100.659	0.0319496	0.853899	0.114151
	Recent Nevado	Crater U25	40	0.0791	56.56	1.66	7.63	1.5077	0.0861	32.36	0.5693	0.1639	100.619	0.0315343	0.855331	0.113135
	Recent Nevado	Crater U25	76.53	0.054	56.08	1.2422	8.22	1.8518	0.0809	32.55	0.4891	0.1625	100.73	0.0234606	0.855363	0.121177
	Recent Nevado	Crater U25	41.67	0.0775	55.43	1.2196	7.89	2.7	0.0721	31.92	0.7409	0.1724	100.222	0.0235483	0.857542	0.11891
	Recent Nevado	Crater U25	47.48	0.0503	54.95	1.3767	7.64	3.11	0.1068	31.82	0.9048	0.1532	100.118	0.0266728	0.85779	0.115537
	Recent Nevado	Crater U25	43.9	0.0291	55.83	1.5	7.6	2.43	0.0911	32.26	0.7338	0.1651	100.642	0.0286705	0.857944	0.113385
	Recent Nevado	Crater U25	145.56	0.0237	55.87	1.44	7.54	2.41	0.1082	32.62	0.7506	0.1612	100.924	0.0273179	0.861033	0.111649
	Recent Nevado	Crater U25	134.44	0.0644	56.17	1.2653	7.84	1.7994	0.0854	32.91	0.4434	0.1776	100.755	0.0237947	0.861125	0.11508
	Recent Nevado	Crater U25	64.91	0.0601	56.39	1.49	7.48	1.6407	0.1063	33.03	0.5982	0.178	100.973	0.0279622	0.86247	0.109568
	Recent Nevado	Crater U25	70.72	0.0567	56.46	1.3742	7.49	1.4865	0.0816	32.94	0.5098	0.153	100.552	0.0259024	0.863901	0.110197
	Recent Nevado	Crater U25	156.68	0.052	55.73	1.3329	7.42	2.62	0.0961	32.59	0.7101	0.1713	100.728	0.025403	0.864217	0.11038
	Recent Nevado	Crater U25	212.28	0.0494	55.51	1.43	7.27	2.88	0.1264	32.54	0.8403	0.1588	100.811	0.0273002	0.864366	0.108333
	Recent Nevado	Crater U25	59.1	0.0401	56.23	1.42	7.41	1.8822	0.081	33	0.5959	0.1372	100.796	0.026732	0.864385	0.108883
	Recent Nevado	Crater U25	201.16	0.069	55.64	1.43	7.25	2.59	0.1026	32.68	0.7532	0.1529	100.674	0.0272071	0.865126	0.107667
	Recent Nevado	Crater U25	167.8	0.0493	55.69	1.3681	7.25	2.46	0.0633	32.67	0.6947	0.1509	100.41	0.026067	0.86611	0.107823
	Recent Nevado	Crater U25	53.29	0.0469	56.65	1.47	7.28	1.5489	0.0817	33.27	0.537	0.1754	101.062	0.0275054	0.866171	0.106324
	Recent Nevado	Crater U25	178.92	0.0273	55.68	1.377	7.24	2.47	0.0822	32.75	0.7357	0.1424	100.511	0.0261805	0.866376	0.107444
	Recent Nevado	Crater U25	190.04	0.076	55.91	1.3689	7.16	2.38	0.1152	32.84	0.6851	0.1418	100.677	0.0259995	0.867854	0.106146
	Recent Nevado	Crater U30	129.52	0.4492	53.43	20.39	8.78	0.7137	0.1954	15.78	0.0046	0.2417	99.9891	0.414436	0.44627	0.139294
	Recent Nevado	Crater U30	140.23	0.3794	53.67	19.55	8.81	0.4254	0.1445	16.6	0.0116	0.3078	99.9026	0.39476	0.466386	0.138855
	Recent Nevado	Crater U30	108.1	0.3564	53.67	20.35	7.16	0.9357	0.223	17.04	0.2253	0.2035	100.17	0.409885	0.477549	0.112566
	Recent Nevado	Crater U30	131	0.1265	54.29	0.4978	27.68	1.5441	0.0923	14.65	0	0.5649	99.4733	0.0117165	0.479766	0.508517
	Recent Nevado	Crater U30	97.39	0.2538	52.84	21.06	5.26	1.3659	0.2893	17.17	0.2563	0.1748	98.686	0.429306	0.487001	0.0836936
	Recent Nevado	Crater U30	118.81	0.3504	53.55	21.7	4.7	1.3447	0.1859	17.41	0.5265	0.1577	99.9449	0.437564	0.488463	0.0739738
	Recent Nevado	Crater U30	75.97	0.3694	53.72	21.18	5.24	1.3405	0.2225	17.45	0.2997	0.1503	100.011	0.427448	0.490008	0.0825442
	Recent Nevado	Crater U30	43.84	0.3932	53.03	21.86	4.25	2.16	0.2838	17.4	0.8533	0.1405	100.375	0.442621	0.49021	0.067169
	Recent Nevado	Crater U30	33.13	0.3446	52.59	21.29	4.75	2.45	0.4104	17.34	0.5982	0.1298	99.9031	0.433389	0.491137	0.0754735
	Recent Nevado	Crater U30	22.42	0.3892	52.59	20.72	5.18	2.81	0.4378	17.34	0.3589	0.1324	99.9632	0.423808	0.493491	0.0827004
	Recent Nevado	Crater U30	141	0.0876	54.94	0.4651	27.87	1.4079	0.1251	15.66	0.0161	0.5641	101.162	0.0105685	0.495119	0.494313
	Recent Nevado	Crater U30	11.71	0.3534	52.71	20.91	4.9	2.67	0.5287	17.5	0.4588	0.1383	100.176	0.426003	0.496076	0.0779208
	Recent Nevado	Crater U30	41	0.0258	48.39	4.4	26.26	0.7661	0.1381	17.67	0.014	0.6741	98.3461	0.0889192	0.496856	0.414225
	Recent Nevado	Crater U30	150.94	0.3288	54.23	19.84	7.18	0.4891	0.1728	18.07	0.0329	0.2373	100.584	0.392197	0.497017	0.110786
	Recent Nevado	Crater U30	54.55	0.3485	53.19	21.3	4.29	2.08	0.2986	17.63	0.7663	0.1144	100.018	0.433113	0.498798	0.068089
	Recent Nevado	Crater U30	65.26	0.3457	53.4	20.9	4.64	1.6884	0.2429	17.93	0.4794	0.1345	99.7702	0.422483	0.504306	0.0732115
	Recent Nevado	Crater U30	1	0.3141	53.28	21.14	4.15	1.9	0.3316	17.9	0.8992	0.1167	100.039	0.428931	0.505344	0.0657248
	Recent Nevado	Crater U30	86.68	0.2645	53.76	21.57	4.02	1.1925	0.1978	18.18	0.6285	0.1232	99.9417	0.431371	0.505878	0.0627516
	Recent Nevado	Crater U30	71	0.0177	51.81	0.6357	28.73	0.8324	0.1042	18.5	0	0.7432	101.375	0.0130262	0.527459	0.459515
	Recent Nevado	Crater U30	61	0.0204	51.56	0.7164	28.41	1.0624	0.0964	18.51	0.0119	0.6889	101.079	0.0147267	0.529427	0.455846
	Recent Nevado	Crater U30	19.7	0.0444	49.56	0.5397	26.83	1.5298	0.1268	17.73	0.0133	0.6895	97.0636	0.0116942	0.534536	0.45377
	Recent Nevado	Crater U30	10.35	0.0515	54.56	0.5604	25.11	1.0207	0.0774	16.73	0.0089	0.6113	98.742	0.0129012	0.535892	0.451207
	Recent Nevado	Crater U30	81	0.0262	51.93	0.5584	28.16	0.8167	0.0856	18.72	0.0214	0.7547	101.079	0.0114931	0.536105	0.452402
	Recent Nevado	Crater U30	37.08	0.055	51.5	0.5642	28.03	0.97	0.0886	18.69	0	0.7236	100.627	0.0116455	0.536764	0.45159
	Recent Nevado	Crater U30	51	0.0382	51.65	0.7003	28.09	0.9167	0.1092	18.86	0.0064	0.7056	101.076	0.0143306	0.536997	0.448672
	Recent Nevado	Crater U30	47.75	0.047	51.22	0.5428	27.35	1.6319	0.1403	18.35	0	0.6483	99.9344	0.011446	0.538393	0.450161
	Recent Nevado	Crater U30	28.06	0	51.44	0.5607	27.94	0.9261	0.1097	18.82	0	0.6716	100.468	0.0115477	0.539305	0.449147
	Recent Nevado	Crater U30	57.1	0.0357	51.38	0.5303	27.43	1.4443	0.0874	18.54	0.0143	0.6632	100.125	0.0111087	0.540386	0.448505
	Recent Nevado	Crater U30	66.45	0.0035	51.41	0.5405	27.32	1.3301	0.0959	18.51	0.0349	0.679	99.9299	0.0113503	0.540842	0.447808
	Recent Nevado	Crater U30	38.4	0	51.29	0.5313	27.31	1.328	0.1147	18.67	0.0039	0.6746	99.9226	0.0111092	0.543171	0.44572
	Recent Nevado	Crater U30	29.05	0.004	51.49	0.5345	27.2	1.0735	0.0668	18.79	0	0.7168	99.8759	0.0111564	0.545701	0.443143
	Recent Nevado	Crater U30	131.9	0.0185	52.05	0.5964	27.17	0.704	0.0705	18.83	0.0078	0.6885	100.137	0.012424	0.54579	0.441786
	Recent Nevado	Crater U30	113.2	0.0341	52.31	0.5589	27.13	0.5214	0.0753	18.91	0.0054	0.7056	100.255	0.0116325	0.547623	0.440745
	Recent Nevado	Crater U30	94.5	0	52.19	0.5712	27.24	0.5083	0.0717	19	0.0144	0.7246	100.32	0.0118335	0.547683	0.440484
	Recent Nevado	Crater U30	46.1	0.035	51.7	0.6419	27.46	0.9909	0.0826	19.22	0.0155	0.7374	100.886	0.0131488	0.547799	0.439052
	Recent Nevado	Crater U30	103.85	0.0391	51.93	0.5677	27.06	0.5218	0.0698	18.91	0	0.6766	99.7751	0.0118269	0.548146	0.440027
	Recent Nevado	Crater U30	31	0.0226	51.32	1.2871	26.09	0.6032	0.084	18.88	0.0267	0.7169	99.0353	0.0268587	0.548184	0.424958
	Recent Nevado	Crater U30	85.15	0.0132	52.16	0.5885	27.11	0.5216	0.0662	19.02	0.0225	0.7127	100.215	0.0122061	0.5489	0.438894
	Recent Nevado	Crater U30	75.8	0.0164	52.22	0.6021	27.02	0.5866	0.0613	19	0	0.6613	100.168	0.0125101	0.549285	0.438205
	Recent Nevado	Crater U30	122.55	0.0294	52.13	0.5981	27	0.4768	0.0638	19	0	0.7141	100.012	0.0124321	0.549509	0.438059
	Recent Nevado	Crater U30	11	0.0089	51.82	0.7233	26.63	0.8074	0.1247	19.29	0	0.7135	100.133	0.0149599	0.555128	0.429912
	Recent Nevado	Crater U30	64.14	0.0347	51.71	0.7757	26.75	1.155	0.1582	19.57	0.0284	0.6652	100.847	0.0158679	0.557015	0.427117
	Recent Nevado	Crater U30	21	0.0453	51.81	0.6533	26.27	0.6525	0.0816	19.27	0	0.717	99.4998	0.0136188	0.558932	0.427449
	Recent Nevado	Crater U30	55.12	0.0376	51.8	0.7194	26.61	0.9577	0.1375	19.75	0	0.7195	100.732	0.0146907	0.561164	0.424146
	Recent Nevado	Crater U30	121	0.0715	51.66	0.5401	26.66	1.3832	0.135	19.71	0.0067	0.6981	100.865	0.0110736	0.562277	0.42665
	Recent Nevado	Crater U30	111	0.0371	51.86	0.4912	26.83	1.1587	0.0657	19.83	0	0.7167	100.99	0.0100195	0.562807	0.427174
	Recent Nevado	Crater U30	101	0.0337	51.81	0.4958	26.82	1.1988	0.0912	19.91	0.0117	0.7211	101.095	0.010091	0.563834	0.426075
	Recent Nevado	Crater U30	19.04	0.017	51.84	0.725	25.87	1.0523	0.1541	19.96	0.0096	0.6691	100.307	0.0148901	0.57039	0.41472
	Recent Nevado	Crater U30	91	0	52.11	0.6951	26.05	0.9418	0.1224	20.22	0	0.7101	100.85	0.0141389	0.572268	0.413593
	Recent Nevado	Crater U30	1	0.0066	52.02	0.7504	25.04	0.7394	0.0922	19.88	0.0345	0.7527	99.3199	0.0156476	0.576796	0.407556
	Recent Nevado	Crater U30	1	0.006	52.81	0.5593	23.94	0.8192	0.0881	21.07	0.0094	0.7832	100.102	0.0115172	0.603693	0.38479
	Recent Nevado	Crater U30	1	0	52.53	0.651	23.94	1.1702	0.1609	21.26	0	0.7871	100.514	0.0133079	0.604703	0.381989
	Recent Nevado	Crater U30	38.5	0.0333	52.06	0.7662	23.51	1.5219	0.1329	21.77	0	0.6639	100.472	0.0155078	0.613079	0.371414
	Recent Nevado	Crater U30	10.02	0.0506	52.43	0.5691	23.58	1.1251	0.12	21.81	0	0.767	100.456	0.0115388	0.615286	0.373175
	Recent Nevado	Crater U30	46	0.0105	52.43	0.7145	23.46	1.1428	0.127	21.96	0.0005	0.6869	100.534	0.0144107	0.616264	0.369326
	Recent Nevado	Crater U30	31	0.0088	52.58	0.6686	23.18	1.0536	0.1037	22.09	0.0148	0.7169	100.423	0.0135077	0.620958	0.365534
	Recent Nevado	Crater U30	8.5	0.0213	53.26	0.5635	22.51	1.1602	0.1025	21.59	0	0.7593	99.9843	0.0116972	0.62358	0.364723
	Recent Nevado	Crater U30	53.5	0.0647	52.74	0.7793	23.03	1.1693	0.1683	22.39	0	0.6383	100.984	0.0156145	0.624208	0.360178
	Recent Nevado	Crater U30	16	0.056	53.05	0.6619	22.64	1.0174	0.1394	21.98	0.0038	0.6462	100.206	0.0135313	0.625208	0.361261
	Recent Nevado	Crater U30	23.5	0.0392	52.65	0.6612	22.9	1.0315	0.1491	22.41	0.012	0.6994	100.558	0.0132993	0.627175	0.359526
	Recent Nevado	Crater U30	1	0.016	53.89	0.6372	21.49	0.9465	0.0948	21.83	0.0168	0.7799	99.7412	0.0133346	0.635639	0.351027
	Recent Nevado	Crater U30	61	0.0508	52.68	0.8234	21.88	1.2824	0.1852	22.9	0.05	0.6143	100.473	0.0165459	0.640272	0.343182
	Recent Nevado	Crater U30	73.16	0.017	51.97	1.1444	20.84	2.57	0.2799	23.02	0.2012	0.4007	100.447	0.0231468	0.647843	0.32901
	Recent Nevado	Crater U30	68.5	0.0549	52.53	0.8282	20.81	1.7157	0.1331	23.46	0.3199	0.5387	100.391	0.0166595	0.656605	0.326735
	Recent Nevado	Crater U30	82.18	0.0322	52.16	1.3552	18.75	3.11	0.3182	24.05	0.2331	0.3582	100.368	0.0274035	0.676657	0.295939
	Recent Nevado	Crater U30	76	0.2126	52.85	0.9106	18.05	3.72	0.1537	22.56	0.4919	0.3567	99.5938	0.0196295	0.676662	0.303709
	Recent Nevado	Crater U30	83.5	0.0699	54	1.53	11.94	3.26	0.1251	28.96	0.5344	0.2137	100.64	0.0299152	0.787862	0.182223
	Recent Nevado	Crater U30	106	0.0415	54.99	1.1667	10.81	2.42	0.1016	30.42	0.1775	0.2485	100.384	0.0224665	0.815053	0.16248
	Recent Nevado	Crater U30	98.5	0.0362	55.02	1.1905	10.42	2.38	0.1016	30.76	0.337	0.2036	100.453	0.0228401	0.82112	0.15604
	Recent Nevado	Crater U30	91	0.0434	54.97	1.3541	9.9	2.64	0.0884	30.78	0.4017	0.2165	100.401	0.0260862	0.825048	0.148865
	Domes	Dome Cu	1	3.79	55.04	3.26	11.72	12.95	0.1022	8.38	0.0178	0.2789	96.626	0.13545	0.484459	0.380091
	Domes	Dome Cu	1	0.0445	51.35	0.5044	28.41	1.0593	0.0826	18.05	0.0097	0.7038	100.229	0.0105535	0.525474	0.463973
	Domes	Dome Cu	12.07	0	51.43	0.6792	26.97	1.1158	0.1174	19.26	0.0288	0.6538	100.265	0.0139958	0.552214	0.43379
	Domes	Dome Cu	11.38	0.028	52.24	0.6287	26.53	1.0203	0.1165	19.81	0.0167	0.6693	101.077	0.0128568	0.56367	0.423473
	Domes	Dome Cu	8.38	0	52.06	0.6817	26.1	1.0084	0.1122	19.94	0.0235	0.6524	100.589	0.0139697	0.568552	0.417478
	Domes	Dome Cu	15.76	0	52.04	0.7292	25.87	1.1097	0.0929	20.14	0.01	0.6437	100.635	0.0148985	0.572539	0.412562
	Domes	Dome Cu	1	0	52.45	0.6983	25.25	0.992	0.1173	19.94	0.0394	0.6342	100.128	0.0145021	0.57619	0.409307
	Domes	Dome Cu	8.98	0	52.08	0.6838	25.47	1.1063	0.1063	20.21	0.0059	0.6323	100.3	0.0140456	0.5776	0.408354
	Domes	Dome Cu	9.07	0.0173	52.37	0.6847	25.25	0.9865	0.0777	20.06	0.0325	0.6067	100.099	0.0141745	0.577818	0.408008
	Domes	Dome Cu	6.66	0.4672	52.69	1.0998	23.59	2.53	0.097	19.39	0.0205	0.5805	100.541	0.0236557	0.580297	0.396048
	Domes	Dome Cu	19.45	0.0649	52.41	0.9202	24.8	1.0418	0.1546	20.85	0.0331	0.601	100.884	0.0186697	0.58859	0.392741
	Domes	Dome Cu	32.92	0.0575	52.12	0.8369	24.91	1.0888	0.1318	20.88	0.0166	0.6097	100.658	0.0169644	0.588907	0.394128
	Domes	Dome Cu	21.76	0.0555	52.66	0.7875	24.72	1.0238	0.1114	20.74	0.039	0.5879	100.732	0.0160911	0.58965	0.394259
	Domes	Dome Cu	12.32	0	52.53	0.7669	24.4	1.0739	0.1285	20.9	0.0909	0.5961	100.494	0.0156855	0.594779	0.389535
	Domes	Dome Cu	32.14	0.0005	52.9	0.7933	24.44	0.8937	0.1085	21.03	0.0862	0.6146	100.879	0.0161467	0.595574	0.38828
	Domes	Dome Cu	4.69	0.0296	52.43	0.853	24.35	1.0462	0.1651	21.05	0.0191	0.6185	100.576	0.0173557	0.59593	0.386714
	Domes	Dome Cu	23.14	0	52.33	0.8267	24.4	1.2589	0.1662	21.08	0.0169	0.6316	100.715	0.0168019	0.596119	0.387079
	Domes	Dome Cu	1	0.019	51.89	0.7938	24.33	1.1698	0.1413	21.1	0.0302	0.6213	100.099	0.0161529	0.59741	0.386438
	Domes	Dome Cu	16.96	0.006	52.28	0.8251	23.99	1.3061	0.1529	21.55	0.016	0.6107	100.742	0.0166569	0.605322	0.378022
	Domes	Dome Cu	25.21	0.015	52.14	0.7887	23.34	1.665	0.1537	21.06	0.3616	0.5663	100.095	0.016326	0.606565	0.377109
	Domes	Dome Cu	17.98	0.0255	52.5	0.8007	23.39	1.2417	0.1555	21.78	0.1309	0.5619	100.591	0.0162209	0.613923	0.369857
	Domes	Dome Cu	17.14	0.0334	53.18	0.8935	22.37	1.0274	0.1285	22.11	0.1145	0.5729	100.43	0.0181909	0.626323	0.355486
	Domes	Dome Cu	33.28	0.0176	52.65	0.8116	22.1	1.4404	0.118	21.99	0.3356	0.5366	100.005	0.0166795	0.628807	0.354513
	Domes	Dome Cu	41.35	0.0116	53.23	0.8257	19.09	1.7397	0.1071	24.24	0.4056	0.4651	100.124	0.0166964	0.682	0.301304
	Domes	Dome Cu	94.42	0.0357	53.24	1.1138	18.84	2.52	0.2776	24.39	0.0967	0.3427	100.863	0.0223855	0.682059	0.295555
	Domes	Dome Cu	65.53	0.1068	53.22	1.81	17.57	2.22	0.3373	24.99	0.0578	0.4249	100.776	0.0359875	0.691338	0.272674
	Domes	Dome Cu	26.83	0.0193	53.52	1.75	17.39	1.6924	0.2828	25.64	0.1037	0.3876	100.793	0.0343143	0.69953	0.266156
	Domes	Dome Cu	104.8	0.0632	53.15	1.1916	17.77	2.76	0.2579	25.38	0.0719	0.3335	100.985	0.0236543	0.701008	0.275338
	Domes	Dome Cu	44.02	0.0148	53.23	1.89	16.76	2.16	0.3403	25.64	0.035	0.411	100.489	0.0373169	0.704388	0.258295
	Domes	Dome Cu	42.52	0.017	53.9	0.8909	18.16	1.6078	0.1797	25.83	0.3389	0.434	101.374	0.0174668	0.704627	0.277906
	Domes	Dome Cu	36.85	0.0681	53.05	2	15.87	2.49	0.3794	25.78	0.0831	0.3653	100.086	0.0397951	0.713729	0.246476
	Domes	Dome Cu	115.18	0.0737	52.97	1.1583	16.84	3.65	0.3036	25.72	0.0705	0.326	101.112	0.0231246	0.714457	0.262419
	Domes	Dome Cu	125.56	0.0491	52.33	1.1561	16.73	4.12	0.341	25.66	0.0773	0.3264	100.794	0.02316	0.71524	0.2616
	Domes	Dome Cu	146.32	0.0351	52.55	1.2509	16.51	3.91	0.3397	25.83	0.1146	0.3252	100.871	0.0249793	0.717683	0.257337
	Domes	Dome Cu	23.64	0.0515	54.39	1.2664	16.73	1.1457	0.1091	26.39	0.213	0.343	100.644	0.02481	0.71936	0.255829
	Domes	Dome Cu	135.94	0.0439	52.71	1.2274	16.45	3.8	0.3361	25.97	0.0976	0.3382	100.978	0.0244493	0.719784	0.255767
	Domes	Dome Cu	51.19	0.0042	54.21	1.2775	16.32	1.46	0.2028	26.56	0.1985	0.392	100.625	0.025063	0.725023	0.249914
	Domes	Dome Cu	58.36	0.0273	54.29	1.3722	16.19	1.6269	0.2289	26.75	0.1738	0.3713	101.037	0.0267856	0.726538	0.246677
	Domes	Dome Cu	48.88	0.0655	53.66	1.42	15.6	1.92	0.2421	26.85	0.2768	0.319	100.353	0.0278674	0.733169	0.238964
	Domes	Dome Cu	40.9	0.0301	53.91	1.2292	15.79	1.8292	0.2443	27.06	0.3037	0.3431	100.751	0.0240054	0.7353	0.240695
	Domes	Dome Cu	56.86	0.0412	53.75	1.49	15.28	2.07	0.2173	26.9	0.3572	0.3172	100.431	0.0293046	0.736126	0.234569
	Domes	Dome Cu	72.82	0.0682	53.63	1.59	15.08	2.13	0.2101	27.01	0.4958	0.3215	100.535	0.0312118	0.73773	0.231058
	Domes	Dome Cu	64.84	0.0362	53.71	1.5	15.18	2.17	0.21	27.07	0.445	0.3048	100.636	0.0294038	0.738332	0.232264
	Domes	Dome Cu	30.52	0.0457	53.91	1.9	14.71	1.8173	0.2608	27.29	0.2041	0.3484	100.489	0.0369988	0.739415	0.223586
	Domes	Dome Cu	8.17	0.0543	53.49	1.62	14.54	2.07	0.2812	27.2	0.4611	0.3114	100.031	0.0318803	0.744778	0.223342
	Domes	Dome Cu	15.34	0.0252	53.56	1.47	14.6	2.13	0.2164	27.04	0.468	0.3202	99.842	0.0291151	0.745175	0.22571
	Domes	Dome Cu	49.42	0.0299	53.74	1.0095	15.07	2.27	0.1945	26.93	0.4457	0.2978	99.9974	0.0200925	0.745787	0.23412
	Domes	Dome Cu	22.51	0.0584	53.46	1.49	14.6	2.13	0.263	27.37	0.4846	0.3268	100.183	0.0292337	0.747178	0.223588
	Domes	Dome Cu	29.68	0.0539	53.82	1.3512	14.64	1.6627	0.2352	27.29	0.3231	0.3372	99.7133	0.0266248	0.748207	0.225168
	Domes	Dome Cu	40.62	0.0585	54.84	1.2625	14.7	1.1337	0.1538	27.71	0.1972	0.2974	100.357	0.0246139	0.751687	0.2237
	Domes	Dome Cu	34.96	0.0106	54.75	1.2741	14.71	1.1289	0.1314	27.82	0.1799	0.3178	100.323	0.0247568	0.752142	0.223102
	Domes	Dome Cu	29.3	0.0656	55.01	1.2335	14.73	1.1033	0.1774	27.88	0.2029	0.3457	100.749	0.0239407	0.752908	0.223151
	Domes	Dome Cu	34.21	0.0424	54.43	1.5	14.2	1.7177	0.1987	28.08	0.3608	0.3249	100.858	0.0290393	0.756385	0.214576
	Domes	Dome Cu	84.04	0.0464	54.39	1.0926	14.21	2.02	0.1663	28.16	0.4813	0.2732	100.847	0.0212709	0.762797	0.215932
	Domes	Dome Cu	63.28	0.06	54.33	1.062	14.09	1.97	0.157	28.13	0.4515	0.285	100.536	0.0207422	0.764455	0.214803
	Domes	Dome Cu	73.66	0.0423	54.49	1.062	14.09	1.96	0.1776	28.27	0.4646	0.2932	100.854	0.0206636	0.765347	0.213989
	Domes	Dome Cu	52.9	0.0246	54.39	1.0099	13.99	2.13	0.1957	28.23	0.5426	0.3176	100.834	0.0197212	0.767038	0.213241
	Domes	Dome Cu	89.77	0	54.51	1.1139	13.07	2.15	0.193	28.76	0.4576	0.254	100.512	0.0216998	0.779561	0.198739
	Domes	Dome Cu	81.7	0.0485	54.44	1.0744	13	2.23	0.1961	28.62	0.4128	0.2799	100.308	0.0210488	0.780157	0.198794
	Domes	Dome Cu	57.49	0.0291	54.35	1.0534	12.95	2.28	0.2023	28.56	0.4411	0.2773	100.143	0.0206956	0.780717	0.198588
	Domes	Dome Cu	65.56	0.0158	54.32	1.0647	12.93	2.18	0.1811	28.55	0.4486	0.2514	99.9417	0.0209251	0.780723	0.198352
	Domes	Dome Cu	73.63	0.0051	54.34	1.0485	12.99	2.19	0.2098	28.63	0.4077	0.2688	100.098	0.0205494	0.780732	0.198718
	Domes	Dome Te	69.32	0.5778	51.38	22.9	5.85	3.21	0.4707	15.12	0.1857	0.1226	99.8317	0.472125	0.433735	0.0941403
	Domes	Dome Te	65.08	0.8138	51.68	22.89	4.74	3.67	0.5541	15.05	0.239	0.0591	99.7013	0.481587	0.440572	0.0778406
	Domes	Dome Te	54.4	0.8263	50.97	22.62	4.7	3.66	0.6663	14.88	0.6803	0.0609	99.0676	0.481353	0.44058	0.078067
	Domes	Dome Te	75.76	0.7044	50.9	23.29	4.03	3.56	0.4252	15.08	1.17	0.0593	99.2207	0.491165	0.442497	0.0663379
	Domes	Dome Te	43.72	0.7814	50.9	23.2	4.1	3.66	0.4927	15.23	1.0613	0.0633	99.4897	0.487485	0.445271	0.0672443
	Domes	Dome Te	118.48	0.5024	50.95	23.22	4.8	3.31	0.5069	15.62	0.076	0.1186	99.1135	0.476794	0.446273	0.0769323
	Domes	Dome Te	86.44	0.6624	51.2	23.35	4	3.23	0.3997	15.38	0.9728	0.056	99.2598	0.48776	0.44702	0.0652196
	Domes	Dome Te	11.68	0.5268	50.61	22.74	4.89	3.51	0.5317	15.89	0.1524	0.0873	98.9424	0.467265	0.454305	0.0784296
	Domes	Dome Te	107.8	0.5083	51.1	23.19	4.49	3.29	0.5134	16.02	0.1099	0.0819	99.3092	0.473412	0.455042	0.0715456
	Domes	Dome Te	22.36	0.5203	51.02	22.75	4.45	3.34	0.5234	16.26	0.2344	0.1016	99.2046	0.465735	0.463158	0.0711075
	Domes	Dome Te	1	0.502	52.36	23.23	4.16	2.61	0.3718	16.46	0.3727	0.1166	100.193	0.470439	0.463804	0.0657575
	Domes	Dome Te	36.95	0.4377	52.7	23.3	3.98	2.54	0.3585	16.44	0.1843	0.0938	100.038	0.472798	0.464165	0.0630378
	Domes	Dome Te	8.19	0.4792	52.67	23.11	4.2	2.56	0.3221	16.44	0.409	0.089	100.283	0.469116	0.464337	0.0665469
	Domes	Dome Te	1	0.4613	52.09	23.18	4.08	2.59	0.3573	16.45	0.3772	0.0934	99.7028	0.47063	0.464711	0.0646584
	Domes	Dome Te	29.76	0.4536	52.94	23.49	4.02	2.46	0.3863	16.67	0.1814	0.0667	100.671	0.471475	0.465545	0.0629796
	Domes	Dome Te	10.76	0.5281	52.83	22.81	4.61	2.67	0.3467	16.57	0.107	0.1044	100.576	0.461146	0.466108	0.0727465
	Domes	Dome Te	22.57	0.4564	52.62	23.46	3.83	2.45	0.3257	16.6	0.423	0.0771	100.245	0.473493	0.46617	0.0603369
	Domes	Dome Te	15.38	0.5462	52.51	23.36	3.7	2.41	0.3003	16.49	0.7509	0.0643	100.136	0.474873	0.466419	0.0587089
	Domes	Dome Te	97.12	0.4186	52.63	23.63	3.51	2.21	0.2712	16.62	0.2554	0.0599	99.6101	0.477425	0.467222	0.0553537
	Domes	Dome Te	15.64	0.477	52.65	23.02	4.29	2.42	0.2996	16.69	0.2278	0.093	100.167	0.464198	0.468279	0.0675232
	Domes	Dome Te	33.04	0.6033	52.04	23.4	3.47	2.13	0.317	16.55	0.2215	0.0614	98.8001	0.476228	0.46865	0.0551223
	Domes	Dome Te	51.33	0.4469	53.26	23.72	3.6	1.94	0.2808	16.82	0.1296	0.0746	100.273	0.475034	0.468691	0.0562744
	Domes	Dome Te	150.52	0.5373	52.13	23.31	3.76	2.33	0.3089	16.65	0.386	0.0983	99.5125	0.471752	0.468852	0.059396
	Domes	Dome Te	44.92	0.4723	52.82	23.31	3.83	2.21	0.3333	16.69	0.4293	0.0919	100.19	0.470701	0.468932	0.060367
	Domes	Dome Te	94.47	0.4848	52.81	23.38	3.89	2.41	0.3579	16.77	0.3293	0.0616	100.5	0.469949	0.469019	0.0610316
	Domes	Dome Te	5.88	0.511	52.9	23.26	3.93	2.35	0.3256	16.72	0.24	0.0754	100.315	0.46903	0.469114	0.061856
	Domes	Dome Te	44.14	0.4384	53.05	23.54	3.7	2.22	0.2982	16.81	0.2414	0.0712	100.37	0.472526	0.469502	0.0579721
	Domes	Dome Te	64.44	0.4699	52.69	22.89	4.14	2.27	0.2892	16.62	0.3379	0.0948	99.8018	0.464805	0.469577	0.0656181
	Domes	Dome Te	1	0.441	53.17	23.14	3.97	2.26	0.2986	16.77	0.3306	0.0681	100.448	0.466791	0.470699	0.0625098
	Domes	Dome Te	101.66	0.4939	52.66	23.17	3.75	2.52	0.3344	16.69	0.7634	0.0653	100.454	0.469794	0.470857	0.0593487
	Domes	Dome Te	40.04	0.4804	53.03	23.11	3.94	2.08	0.325	16.76	0.3289	0.0869	100.144	0.46682	0.471058	0.0621218
	Domes	Dome Te	139.84	0.4228	52.46	23.29	3.76	2.09	0.3246	16.8	0.2064	0.0776	99.4382	0.469553	0.471276	0.05917
	Domes	Dome Te	25.4	0.5124	53.12	22.94	4.08	2.31	0.3074	16.75	0.3038	0.1191	100.458	0.464086	0.471488	0.0644263
	Domes	Dome Te	59.56	0.4845	52.74	23.04	3.93	2.18	0.3228	16.74	0.4072	0.0632	99.9217	0.466401	0.471502	0.0620966
	Domes	Dome Te	129.16	0.4726	52.92	23.29	3.7	2.25	0.2859	16.81	0.3705	0.0559	100.155	0.469865	0.47187	0.0582645
	Domes	Dome Te	20.52	0.4159	53.24	23.21	3.89	2.1	0.3005	16.89	0.2956	0.0857	100.432	0.466561	0.472404	0.0610353
	Domes	Dome Te	49.8	0.4894	52.96	23.08	3.83	2.15	0.2933	16.85	0.4542	0.0995	100.212	0.466126	0.473498	0.060376
	Domes	Dome Te	80.09	0.3968	53.55	23.66	3.51	1.6815	0.2822	17.08	0.1338	0.0544	100.349	0.471646	0.47374	0.0546143
	Domes	Dome Te	35.16	0.4622	53.09	22.92	3.9	2.2	0.2979	16.82	0.339	0.1075	100.146	0.464274	0.474063	0.0616627
	Domes	Dome Te	54.68	0.4848	52.8	22.89	3.93	2.28	0.3002	16.84	0.5213	0.0832	100.138	0.463467	0.474423	0.0621103
	Domes	Dome Te	1	0.4812	53.04	22.78	4.3	2.16	0.3038	16.96	0.3493	0.1242	100.501	0.458033	0.474482	0.0674854
	Domes	Dome Te	65.71	0.3969	53.49	23.53	3.58	1.8205	0.2402	17.09	0.1481	0.1131	100.418	0.46963	0.474599	0.0557718
	Domes	Dome Te	58.52	0.3837	53.57	23.56	3.59	1.8534	0.2719	17.17	0.133	0.0653	100.601	0.468833	0.475405	0.0557617
	Domes	Dome Te	72.9	0.4506	53.31	23.5	3.55	1.7871	0.2557	17.14	0.1277	0.0589	100.186	0.46888	0.475834	0.0552866
	Domes	Dome Te	6.98	0.459	53.34	22.65	4.19	2.16	0.3337	17.04	0.2786	0.0889	100.541	0.456378	0.477724	0.0658975
	Domes	Dome Te	87.28	0.2973	53.83	23.28	3.67	1.6083	0.2737	17.23	0.1278	0.0886	100.406	0.4645	0.478343	0.0571567
	Domes	Dome Te	12.96	0.448	53.23	22.59	4.22	2	0.2848	17.07	0.2671	0.108	100.221	0.455122	0.478516	0.0663625
	Domes	Dome Te	36.88	0.421	53.37	22.6	4.14	1.8654	0.2977	17.21	0.2666	0.0987	100.278	0.454021	0.48106	0.0649182
	Domes	Dome Te	30.9	0.406	53.46	22.49	4.15	1.881	0.2661	17.18	0.2194	0.0843	100.143	0.453122	0.481614	0.0652637
	Domes	Dome Te	18.94	0.445	53.19	22.45	4.21	1.8395	0.2887	17.19	0.2576	0.0753	99.9462	0.452127	0.481693	0.0661796
	Domes	Dome Te	24.92	0.4261	53.44	22.72	4.22	1.8765	0.2693	17.4	0.2537	0.1212	100.732	0.452372	0.482044	0.065584
	Domes	Dome Te	42.86	0.4269	53.32	22.43	4.16	1.8519	0.259	17.23	0.2444	0.0925	100.018	0.451755	0.482847	0.0653981
	Domes	Dome Te	48.84	0.4269	53.46	22.48	4.14	1.8604	0.2893	17.32	0.214	0.0952	100.294	0.451311	0.483814	0.0648751
	Domes	Dome Te	54.82	0.4579	53.43	22.53	4.11	1.9	0.2925	17.45	0.25	0.0877	100.508	0.450439	0.485423	0.0641379
	Domes	Dome Te	30.28	1.2265	51.43	19.24	5.25	5.23	0.6337	15.9	0.3208	0.0808	99.7659	0.423219	0.486641	0.0901401
	Domes	Eastern Dome U9	109.92	0.6554	52.15	20.7	10.51	1.8604	0.3738	13.45	0	0.3377	100.043	0.434711	0.39301	0.172279
	Domes	Eastern Dome U9	102.14	0.5794	52.15	20.7	10.5	1.578	0.3215	13.6	0	0.3262	99.7561	0.432885	0.395723	0.171392
	Domes	Eastern Dome U9	94.36	0.5744	52.47	20.77	10.51	1.3439	0.2662	13.67	0	0.3361	99.9407	0.432763	0.396308	0.170929
	Domes	Eastern Dome U9	86.58	0.4928	51.84	21.12	9.82	1.3675	0.2597	13.8	0	0.3115	99.0116	0.440126	0.400141	0.159732
	Domes	Eastern Dome U9	22.3	0.6437	50.67	20.1	10.08	2.89	0.5585	13.45	0.0501	0.3042	98.7466	0.430571	0.400887	0.168542
	Domes	Eastern Dome U9	32.95	0.6054	51.27	20.4	10.02	2.19	0.4468	13.7	0.0853	0.2946	99.0164	0.431443	0.403148	0.165409
	Domes	Eastern Dome U9	11.65	0.6141	51.61	20.43	10	1.8517	0.3226	13.76	0.0193	0.2932	98.9047	0.431185	0.404077	0.164738
	Domes	Eastern Dome U9	1	0.5765	51.55	20.03	10.58	1.4196	0.4185	13.81	0.0121	0.3353	98.7391	0.421654	0.404502	0.173844
	Domes	Eastern Dome U9	16.38	0.5915	52.26	20.84	9.72	1.5013	0.2669	13.95	0.0061	0.315	99.4676	0.435647	0.405753	0.158599
	Domes	Eastern Dome U9	43.6	0.7055	50.93	20.02	9.89	2.64	0.6188	13.62	0.1445	0.3081	98.888	0.428782	0.405882	0.165336
	Domes	Eastern Dome U9	11.91	0.5759	51.82	20.51	9.79	1.93	0.3767	13.83	0.0104	0.2608	99.1147	0.43275	0.406017	0.161232
	Domes	Eastern Dome U9	44.64	0.6284	51.59	20.85	9.6	1.8046	0.3351	13.93	0.0175	0.2944	99.0501	0.436874	0.406118	0.157007
	Domes	Eastern Dome U9	1	0.6103	52.01	20.42	9.93	1.7092	0.2923	13.87	0.0157	0.2981	99.1744	0.430171	0.406549	0.16328
	Domes	Eastern Dome U9	40.32	0.4782	51.87	20.59	9.84	1.6843	0.326	13.92	0.0054	0.2973	99.0113	0.432211	0.406564	0.161225
	Domes	Eastern Dome U9	30.49	0.5469	51.75	20.31	9.89	1.97	0.3621	13.84	0.0135	0.2844	98.9768	0.429509	0.407239	0.163252
	Domes	Eastern Dome U9	24.07	0.5507	52.57	21.07	9.42	1.3833	0.2977	14.1	0.0212	0.339	99.7623	0.43858	0.40837	0.15305
	Domes	Eastern Dome U9	1	0.4939	50.81	19.88	10.43	2.97	0.6886	13.93	0.003	0.2927	99.5117	0.419381	0.408878	0.171741
	Domes	Eastern Dome U9	63.24	0.5463	50.9	20.72	9.36	3.36	0.6823	13.95	0.0099	0.2603	99.7987	0.4368	0.409183	0.154016
	Domes	Eastern Dome U9	34.2	0.5999	51.31	19.93	10.05	2.4	0.4619	13.85	0.0553	0.3272	98.9844	0.423634	0.409623	0.166743
	Domes	Eastern Dome U9	47.14	0.5094	52.78	20.52	9.73	1.0535	0.2051	14.03	0.0205	0.3123	99.1706	0.430767	0.409801	0.159432
	Domes	Eastern Dome U9	15.86	0.6195	51.8	20.83	9.7	1.6277	0.282	14.18	0.0572	0.343	99.445	0.432775	0.40992	0.157305
	Domes	Eastern Dome U9	39.45	0.5009	52.83	20.66	9.68	1.0202	0.2155	14.09	0.0232	0.3392	99.3664	0.432033	0.409966	0.158001
	Domes	Eastern Dome U9	1	0.5701	51.9	20.96	9.59	1.6064	0.3	14.21	0.036	0.3126	99.4942	0.4347	0.410056	0.155244
	Domes	Eastern Dome U9	1	0.5964	51.85	20.24	9.86	1.91	0.3739	13.99	0.0017	0.2872	99.1198	0.426988	0.410652	0.16236
	Domes	Eastern Dome U9	8.43	0.5937	52.15	20.95	9.6	1.6323	0.3158	14.28	0.0568	0.3107	99.8972	0.433636	0.411264	0.1551
	Domes	Eastern Dome U9	22.82	0.6316	51.54	20.48	9.63	1.96	0.3651	14.06	0.0171	0.2858	98.974	0.430617	0.411336	0.158047
	Domes	Eastern Dome U9	79.64	0.482	52.44	20.71	9.6	1.4206	0.325	14.18	0.0102	0.3177	99.4905	0.432059	0.411614	0.156327
	Domes	Eastern Dome U9	55.46	0.4436	50.67	20.75	9.29	3.17	0.8438	14.12	0.0248	0.2896	99.6076	0.435487	0.412328	0.152185
	Domes	Eastern Dome U9	9.3	0.6854	50.95	20.72	9	3.07	0.5532	14.02	0.0107	0.2717	99.2821	0.438497	0.412835	0.148668
	Domes	Eastern Dome U9	71.02	0.4734	52.02	20.77	9.62	2.05	0.483	14.3	0.009	0.3697	100.097	0.431129	0.413007	0.155863
	Domes	Eastern Dome U9	1	0.5861	51.35	20.51	9.55	2.31	0.4017	14.15	0.0448	0.3005	99.2165	0.430408	0.413163	0.156429
	Domes	Eastern Dome U9	59.98	0.4061	52.36	20.98	9.2	1.3171	0.2916	14.28	0.0301	0.351	99.2191	0.436809	0.413681	0.149511
	Domes	Eastern Dome U9	33.73	0.5799	50.26	20.61	8.66	4.24	0.6865	13.88	0.067	0.248	99.2314	0.441497	0.413704	0.144799
	Domes	Eastern Dome U9	17.6	0.5941	49.8	20.05	9.27	4.49	0.7715	13.84	0.0597	0.2784	99.1636	0.430788	0.413749	0.155463
	Domes	Eastern Dome U9	72.73	0.5579	52.43	19.98	10.14	1.2626	0.2899	14.15	0.0367	0.4279	99.2781	0.419898	0.413767	0.166335
	Domes	Eastern Dome U9	50.15	0.383	52.43	21.06	9.21	1.2694	0.306	14.34	0.0125	0.3154	99.3263	0.436916	0.413942	0.149141
	Domes	Eastern Dome U9	16.94	0.5259	52.36	20.27	9.66	1.5918	0.3073	14.13	0.0224	0.3356	99.2088	0.427002	0.414161	0.158837
	Domes	Eastern Dome U9	31.76	0.523	52.61	20.65	9.59	1.157	0.3432	14.3	0.0052	0.3614	99.5475	0.429918	0.414241	0.155841
	Domes	Eastern Dome U9	23.29	0.5235	51.45	20.84	9.07	2.58	0.3989	14.21	0.085	0.2865	99.4504	0.436977	0.414578	0.148445
	Domes	Eastern Dome U9	25.54	0.4284	50.5	20.13	9.73	3.06	0.8162	14.13	0.0241	0.3008	99.1195	0.424817	0.414907	0.160276
	Domes	Eastern Dome U9	99.3	0.3945	52.34	21.11	8.93	1.3625	0.307	14.33	0.0203	0.2978	99.0946	0.439618	0.415226	0.145157
	Domes	Eastern Dome U9	24.91	0.5955	52.41	19.91	9.83	1.524	0.2876	14.08	0.0348	0.368	99.0444	0.422058	0.415293	0.162649
	Domes	Eastern Dome U9	37.81	0.5649	51.7	20.28	9.69	2.08	0.3764	14.23	0.0076	0.2825	99.2215	0.425665	0.415581	0.158753
	Domes	Eastern Dome U9	48.82	0.6046	52.6	19.94	9.94	1.378	0.2679	14.18	0.0218	0.3474	99.2797	0.420421	0.415994	0.163585
	Domes	Eastern Dome U9	47.68	0.4491	50.78	20.87	8.89	3.43	0.8664	14.24	0.0274	0.1955	99.7559	0.438238	0.416053	0.145709
	Domes	Eastern Dome U9	8.69	0.4344	52.66	20.77	9.42	1.1531	0.3248	14.41	0	0.3151	99.4926	0.431156	0.416211	0.152633
	Domes	Eastern Dome U9	32.88	0.5872	52.52	19.88	9.85	1.4575	0.2402	14.13	0.0066	0.353	99.0245	0.42093	0.416281	0.16279
	Domes	Eastern Dome U9	13.27	0.5132	51.2	19.39	10.32	2.43	0.6399	14.08	0.0365	0.3035	98.922	0.412237	0.416507	0.171256
	Domes	Eastern Dome U9	40.85	0.6084	52.63	20.01	9.82	1.431	0.2821	14.2	0.0023	0.37	99.3538	0.42186	0.416544	0.161596
	Domes	Eastern Dome U9	109.13	0.3133	52.42	21.26	8.77	1.1817	0.2874	14.43	0.0098	0.337	99.013	0.441232	0.416698	0.14207
	Domes	Eastern Dome U9	69.81	0.3749	52.45	21.09	9.03	1.2896	0.2729	14.45	0	0.3211	99.2849	0.437153	0.41675	0.146097
	Domes	Eastern Dome U9	1	0.5004	50.12	20.17	9.36	3.85	0.945	14.11	0.0305	0.2106	99.3088	0.42816	0.416753	0.155087
	Domes	Eastern Dome U9	8.97	0.5862	52.54	20.11	9.56	1.5457	0.2867	14.16	0.0279	0.3419	99.1678	0.425391	0.416764	0.157845
	Domes	Eastern Dome U9	50.08	0.5476	51.92	20.37	9.49	2	0.3052	14.29	0.0539	0.3011	99.284	0.427399	0.417182	0.15542
	Domes	Eastern Dome U9	56.79	0.5619	52.73	19.74	9.91	1.3116	0.2502	14.16	0.0333	0.3863	99.089	0.418421	0.417619	0.16396
	Domes	Eastern Dome U9	78.8	0.3664	52.51	20.57	9.59	1.5202	0.4021	14.48	0.0271	0.3627	99.8346	0.426738	0.417972	0.15529
	Domes	Eastern Dome U9	54.83	0.4604	52.79	20.76	9.27	1.0173	0.196	14.45	0.0011	0.3218	99.2765	0.431589	0.417986	0.150425
	Domes	Eastern Dome U9	138.62	0.3415	52.36	21.11	8.85	1.2259	0.286	14.48	0	0.345	98.9985	0.438283	0.418298	0.143419
	Domes	Eastern Dome U9	118.96	0.3772	52.46	21.4	8.7	1.1342	0.2519	14.57	0	0.3168	99.2102	0.44157	0.418308	0.140121
	Domes	Eastern Dome U9	42.5	0.5697	51.16	20.46	9.11	2.87	0.5654	14.25	0.1252	0.2577	99.3687	0.431662	0.418316	0.150022
	Domes	Eastern Dome U9	32.5	0.5823	52.09	19.56	9.64	1.552	0.2572	14.01	0.034	0.3069	98.0391	0.419941	0.418513	0.161546
	Domes	Eastern Dome U9	1	0.3914	50.7	20.61	8.95	2.96	0.7675	14.28	0.0003	0.2157	98.9025	0.434214	0.418606	0.14718
	Domes	Eastern Dome U9	64.76	0.498	52.59	19.51	10.03	1.331	0.2701	14.19	0.0241	0.3723	98.8166	0.414376	0.419345	0.166279
	Domes	Eastern Dome U9	26.2	0.5594	52.13	19.69	9.4	1.5104	0.2698	14.11	0.01	0.306	97.9896	0.421991	0.420761	0.157248
	Domes	Eastern Dome U9	10.83	0.5861	51.92	20.3	9.33	1.97	0.3593	14.49	0.0156	0.2759	99.2512	0.425186	0.422282	0.152533
	Domes	Eastern Dome U9	25.9	0.5689	50.14	20.11	9.05	4.1	0.7354	14.28	0.1895	0.2593	99.4406	0.427481	0.422361	0.150159
	Domes	Eastern Dome U9	19.9	0.6246	52.54	19.73	9.41	1.4545	0.2448	14.32	0.0096	0.3074	98.6499	0.41979	0.423934	0.156276
	Domes	Eastern Dome U9	39.9	0.5423	49.45	20.14	8.35	5.65	0.9985	14.12	0.0461	0.1654	99.4708	0.434951	0.424294	0.140756
	Domes	Eastern Dome U9	128.79	0.3902	52.58	21.27	8.63	1.0323	0.2893	14.85	0	0.314	99.3559	0.43704	0.424552	0.138408
	Domes	Eastern Dome U9	38.8	0.5139	52.18	19.89	9.35	1.5489	0.3621	14.42	0.0193	0.3059	98.6	0.420934	0.424615	0.154451
	Domes	Eastern Dome U9	7.3	0.4673	51.51	19.96	9.02	2.04	0.5007	14.45	0.0169	0.2531	98.2315	0.423723	0.426816	0.149461
	Domes	Eastern Dome U9	13.6	0.5051	51.63	19.72	9.23	2.05	0.4825	14.43	0.0056	0.2532	98.3207	0.419554	0.427168	0.153278
	Domes	Eastern Dome U9	96.85	0.6604	49.13	20.53	7.56	5.52	0.6365	14.24	0.0987	0.194	98.6178	0.443946	0.428451	0.127603
	Domes	Eastern Dome U9	45.1	0.4702	51.65	19.8	9.08	2.02	0.5283	14.49	0	0.2763	98.3204	0.420841	0.428521	0.150639
	Domes	Eastern Dome U9	1	0.4031	52.78	20.29	8.91	1.1527	0.2546	14.83	0	0.333	98.9587	0.423776	0.430969	0.145255
	Domes	Eastern Dome U9	75.7	0.6278	50.04	19.83	8.54	4.03	0.685	14.5	0.4539	0.2233	98.9361	0.424888	0.432286	0.142826
	Domes	Eastern Dome U9	62.35	0.5431	51.24	20.26	8.45	3.21	0.5168	14.75	0.1161	0.2656	99.3604	0.427618	0.433171	0.13921
	Domes	Eastern Dome U9	1	0.5005	50.54	19.56	7.93	3.85	0.7915	14.8	0.0166	0.1721	98.1737	0.422076	0.444359	0.133565
	Domes	Eastern Dome U9	51.4	0.4695	50.47	19.57	7.66	4.21	0.7574	14.77	0.0382	0.1523	98.1006	0.424513	0.445791	0.129696
	Domes	Eastern Dome U9	20.66	0.4758	51.41	20.71	7.4	2.96	0.765	15.32	0.0374	0.2145	99.2936	0.433243	0.445925	0.120832
	Domes	Eastern Dome U9	57.7	0.4528	49.55	18.69	8.55	5.07	1.0147	14.69	0.005	0.1825	98.2094	0.408049	0.446248	0.145703
	Domes	Eastern Dome U9	67.87	0.4655	49.99	20.62	6.65	4.23	0.5347	15.17	0.2455	0.1733	98.0863	0.439489	0.449879	0.110632
	Domes	Eastern Dome U9	38.15	0.4455	51.28	21.5	5.94	3.99	0.4775	15.89	0.1236	0.1408	99.7874	0.445635	0.458264	0.0961006
	Domes	Eastern Dome U9	50.8	0.4502	50.26	20.13	6.77	4.78	0.7744	15.52	0.4881	0.1859	99.3586	0.428218	0.459371	0.112411
	Domes	Eastern Dome U9	30.72	0.4307	50.98	21.2	5.9	4.11	0.5152	15.83	0.1629	0.1289	99.2644	0.443227	0.460492	0.096281
	Domes	Eastern Dome U9	45.58	0.4418	51.13	21.28	5.96	4.07	0.4984	15.91	0.143	0.1603	99.5996	0.442695	0.460526	0.0967783
	Domes	Eastern Dome U9	54.25	0.4225	51.72	20.52	6.64	3.08	0.4753	15.9	0.2861	0.1816	99.2327	0.429055	0.462577	0.108368
	Domes	Eastern Dome U9	53.01	0.4714	51.2	21.04	5.87	4.09	0.4835	15.95	0.1875	0.1302	99.4229	0.440033	0.464142	0.0958244
	Domes	Eastern Dome U9	60.44	0.4752	50.8	20.82	5.95	4.3	0.4823	15.93	0.2115	0.1377	99.109	0.437127	0.465365	0.0975084
	Domes	Eastern Dome U9	8.78	1.0354	51.19	18.41	8.2	3.93	0.6133	15.55	0.0579	0.1772	99.3272	0.396368	0.465829	0.137803
	Domes	Eastern Dome U9	74.62	0.4292	51.46	19.93	6.84	3.75	0.5658	16.05	0.1138	0.1892	99.3349	0.41869	0.46915	0.11216
	Domes	Eastern Dome U9	86.89	0.3965	51.64	19.79	7.16	3.47	0.4735	16.12	0.1744	0.2077	99.4429	0.413947	0.469154	0.116899
	Domes	Eastern Dome U9	59.1	0.4217	51.72	21.24	5.4	3.23	0.4086	16.32	0.4712	0.1517	99.3708	0.441007	0.471478	0.0875151
	Domes	Eastern Dome U9	99.16	0.5543	53.86	18.11	7.72	2.82	0.2788	15.53	0.1072	0.2262	99.4924	0.395897	0.472374	0.131728
	Domes	Eastern Dome U9	64.9	0.392	51.22	20.42	6.01	3.84	0.5821	16.19	0.2202	0.1577	99.0321	0.428651	0.472875	0.0984739
	Domes	Eastern Dome U9	75.55	0.4089	51.58	20.6	5.89	3.52	0.4794	16.25	0.1502	0.1547	99.0363	0.430894	0.472941	0.0961649
	Domes	Eastern Dome U9	67.4	0.4014	51.23	20.91	5.43	3.53	0.4272	16.24	0.5197	0.1508	98.8453	0.437955	0.473274	0.0887715
	Domes	Eastern Dome U9	24.34	0.4635	52.52	20.05	6.34	2.4	0.3896	16.62	0.1798	0.2194	99.2052	0.416635	0.480533	0.102832
	Domes	Eastern Dome U9	111.43	0.4087	52.59	17.2	9.44	2.04	0.2463	17.1	0.111	0.2591	99.4009	0.355657	0.491983	0.152361
	Domes	Eastern Dome U9	16.56	0.4317	52.29	16.23	8.17	2.69	0.3764	18.67	0.1364	0.2288	99.3354	0.334058	0.534685	0.131257
	Domes	Eastern Dome U9	86.2	2.87	44.45	11.6	8.72	10.94	1.74	15.96	0.2697	0.1105	97.0275	0.285623	0.546787	0.16759
	Domes	Eastern Dome U9	43.5	0.0953	49.06	1.2599	20.13	1.2706	0.1677	18.72	0.0305	0.6395	91.457	0.0292869	0.605472	0.365241
	Domes	Eastern Dome U9	32.12	0.4643	54.13	11.09	9.84	2.54	0.2938	21.04	0.1325	0.2504	99.9114	0.230823	0.609317	0.15986
	Domes	Eastern Dome U9	86.89	0.0727	53.23	1.1081	22.65	0.4028	0.0947	22.05	0.0221	0.6938	100.324	0.0224005	0.620208	0.357392
	Domes	Eastern Dome U9	111.43	0.0398	52.95	1.0441	22.66	0.668	0.1505	22.02	0.0051	0.6968	100.241	0.0211485	0.620593	0.358259
	Domes	Eastern Dome U9	99.16	0.0591	53.32	1.0845	22.47	0.4588	0.0966	21.97	0.007	0.6853	100.153	0.0220461	0.621417	0.356536
	Domes	Eastern Dome U9	74.62	0.0311	53.5	1.099	22.49	0.3358	0.1063	22.18	0.0052	0.6724	100.425	0.0221955	0.623274	0.354531
	Domes	Eastern Dome U9	62.35	0.0616	53.31	1.131	22.1	0.4508	0.0997	22.36	0.0145	0.6774	100.205	0.0228519	0.628611	0.348538
	Domes	Eastern Dome U9	37.81	0	53.15	1.2935	21.71	0.6956	0.2056	22.34	0.0275	0.6753	100.101	0.0262251	0.63021	0.343565
	Domes	Eastern Dome U9	50.08	0.0385	53.16	1.1953	21.79	0.6032	0.2075	22.52	0	0.6606	100.175	0.0241291	0.632534	0.343337
	Domes	Eastern Dome U9	25.54	0.047	53.22	1.1572	21.67	0.8284	0.1731	22.45	0.0036	0.6948	100.244	0.0234686	0.633499	0.343033
	Domes	Eastern Dome U9	13.27	0.0212	53.07	1.0885	21.72	0.945	0.205	22.44	0.013	0.6576	100.162	0.0220948	0.633777	0.344129
	Domes	Eastern Dome U9	52.6	0	52.86	0.9984	20.65	0.972	0.1061	21.47	0.0179	1.0732	98.1576	0.0212471	0.635738	0.343015
	Domes	Eastern Dome U9	78.4	0.0288	52.93	0.876	20.73	0.7991	0.0844	21.49	0.006	1.0175	97.9619	0.018655	0.636765	0.34458
	Domes	Eastern Dome U9	121.34	0.0431	53.17	0.9618	20.56	0.7655	0.0458	21.56	0.0204	1.1666	98.3001	0.0204602	0.638153	0.341387
	Domes	Eastern Dome U9	110.4	0.0599	53.09	0.8013	20.72	0.9116	0.091	21.53	0.0107	1.1154	98.3299	0.017074	0.638315	0.344611
	Domes	Eastern Dome U9	30.28	0.0456	53.48	0.6709	21.06	0.6797	0.0722	21.71	0.0227	0.9568	98.7035	0.014179	0.638409	0.347412
	Domes	Eastern Dome U9	65.5	0.0693	52.85	0.8246	20.61	0.9892	0.0783	21.5	0.0089	1.0051	97.9408	0.0176096	0.638846	0.343545
	Domes	Eastern Dome U9	39.7	0.0243	52.78	1.0375	20.36	0.9893	0.0771	21.55	0.0215	1.0134	97.8561	0.0221149	0.63914	0.338746
	Domes	Eastern Dome U9	91.3	0.0421	53.18	0.7156	20.71	0.6225	0.0692	21.54	0.0397	0.9974	97.9296	0.0152738	0.639697	0.345029
	Domes	Eastern Dome U9	63.7	0.0042	53.16	0.8766	21.52	0.6513	0.0892	22.57	0.0094	1.0491	99.9299	0.0178615	0.639879	0.34226
	Domes	Eastern Dome U9	20.52	0.0367	53.42	0.6341	20.95	0.5982	0.1151	21.71	0.024	0.9899	98.4781	0.0134361	0.640068	0.346496
	Domes	Eastern Dome U9	18	0.0676	53.36	1.065	21.49	0.8393	0.2099	22.84	0.0245	0.6421	100.543	0.0214638	0.640478	0.338058
	Domes	Eastern Dome U9	74.15	0.0109	53.3	0.9321	21.46	0.764	0.0712	22.65	0.0104	1.0376	100.247	0.018946	0.640581	0.340473
	Domes	Eastern Dome U9	53.25	0	53.23	0.7868	21.65	0.5194	0.0688	22.68	0	1.1532	100.088	0.0159781	0.640846	0.343175
	Domes	Eastern Dome U9	74.62	0.0201	53.01	1.0342	21.4	0.7029	0.1441	22.79	0.0058	0.6932	99.8003	0.020915	0.641281	0.337804
	Domes	Eastern Dome U9	21.9	0.0213	53.66	0.7333	21.78	0.5184	0.0935	22.8	0.0116	1.1104	100.734	0.0148269	0.641437	0.343736
	Domes	Eastern Dome U9	104.2	0.0526	53.33	0.674	20.73	0.7161	0.0632	21.69	0.0199	0.9617	98.2376	0.01433	0.641649	0.344021
	Domes	Eastern Dome U9	82.8	0.0632	53.22	1.0104	21.43	0.6478	0.1476	22.84	0	0.633	99.9996	0.0204051	0.64179	0.337805
	Domes	Eastern Dome U9	55.7	0.0229	53.58	0.8416	20.74	0.5746	0.0772	21.96	0.0206	0.9596	98.7766	0.0176862	0.642113	0.340201
	Domes	Eastern Dome U9	40.04	0.0226	53.35	0.6814	20.8	0.6075	0.0855	21.83	0	1.0076	98.3858	0.0144087	0.642283	0.343308
	Domes	Eastern Dome U9	90.98	0.0382	53.44	0.9939	21.5	0.5123	0.1255	22.95	0.0022	0.6652	100.227	0.0199947	0.6424	0.337605
	Domes	Eastern Dome U9	10.76	0.0221	53.54	0.6457	20.86	0.6199	0.0705	21.86	0.0164	0.9345	98.5692	0.0136385	0.642448	0.343914
	Domes	Eastern Dome U9	88.84	0.0452	53.03	0.785	20.75	0.9513	0.1356	21.93	0.0293	0.8984	98.5548	0.0165282	0.642458	0.341014
	Domes	Eastern Dome U9	105.6	0.0371	53.26	0.9171	21.48	0.6198	0.0887	22.86	0.0085	1.0963	100.368	0.0185308	0.642695	0.338774
	Domes	Eastern Dome U9	115.52	0.0448	53.73	0.943	21.41	0.3988	0.0888	22.85	0.0022	0.6877	100.171	0.0190706	0.642968	0.337961
	Domes	Eastern Dome U9	11.45	0.0362	53.47	0.7123	21.61	0.5635	0.0898	22.76	0.0242	1.0625	100.338	0.0144635	0.643034	0.342503
	Domes	Eastern Dome U9	99.16	0.0309	53.57	0.9646	21.46	0.352	0.0979	22.95	0.0079	0.685	100.123	0.0194289	0.643183	0.337388
	Domes	Eastern Dome U9	116.06	0.053	53.33	0.8725	21.42	0.5752	0.0544	22.8	0.0312	1.1182	100.256	0.0176922	0.643282	0.339026
	Domes	Eastern Dome U9	66.44	0.0531	53.1	1.0633	21.22	0.7864	0.1748	22.85	0.0046	0.6672	99.9194	0.0215156	0.643332	0.335152
	Domes	Eastern Dome U9	147.3	0.3957	54.65	0.996	19.11	2.07	0.1783	20.63	0.0255	0.8973	99.2527	0.0223235	0.643357	0.334319
	Domes	Eastern Dome U9	24.4	0.0537	52.48	2.13	19.88	1.4157	0.2277	22.9	0.0256	0.5801	99.704	0.0430214	0.643564	0.313415
	Domes	Eastern Dome U9	42.8	0.0449	53.46	0.6651	21.65	0.5225	0.076	22.81	0.0109	1.102	100.346	0.0134904	0.643746	0.342764
	Domes	Eastern Dome U9	107.34	0.0539	53.73	0.9644	21.33	0.3252	0.1171	22.88	0.0094	0.6895	100.103	0.0195031	0.643803	0.336694
	Domes	Eastern Dome U9	52	0.012	53.34	1.1474	21.09	0.7438	0.2185	22.9	0.0201	0.6465	100.12	0.0231929	0.64406	0.332747
	Domes	Eastern Dome U9	136.85	0.0386	52.8	0.7963	21.48	0.9757	0.1508	22.84	0.0206	1.0261	100.131	0.0161384	0.644067	0.339795
	Domes	Eastern Dome U9	53.3	0.0099	53.37	0.8488	21.52	0.7184	0.1092	22.96	0.0244	1.0522	100.613	0.0171155	0.644178	0.338707
	Domes	Eastern Dome U9	1	0.0378	53.46	1.0376	21.16	0.872	0.0966	22.85	0.0213	0.6407	100.179	0.0210265	0.644278	0.334696
	Domes	Eastern Dome U9	74.22	0.0623	53.18	0.8888	21.41	0.7591	0.087	22.92	0.021	1.0308	100.362	0.0179588	0.644375	0.337667
	Domes	Eastern Dome U9	8.65	0.0336	52.87	1.1053	21.07	1.1712	0.2106	22.86	0	0.5771	99.8979	0.0223932	0.644411	0.333195
	Domes	Eastern Dome U9	95.14	0.0218	53.36	0.9169	21.45	0.6947	0.0845	23.02	0.0232	1.0918	100.67	0.0184526	0.644601	0.336946
	Domes	Eastern Dome U9	60.5	0.049	53.25	1.1714	21.04	0.8333	0.1806	22.96	0.0322	0.6939	100.214	0.0236453	0.644855	0.3315
	Domes	Eastern Dome U9	77.5	0.0366	53.21	1.1861	20.93	0.8658	0.2744	22.87	0.0598	0.6358	100.08	0.0240373	0.644884	0.331079
	Domes	Eastern Dome U9	69	0.05	53.14	1.2206	21.12	0.8578	0.2328	23.11	0.005	0.6565	100.395	0.0244801	0.644898	0.330622
	Domes	Eastern Dome U9	1	0.0687	53.43	0.7074	21.46	0.5876	0.1315	22.8	0.0033	1.0355	100.232	0.0143834	0.645033	0.340584
	Domes	Eastern Dome U9	44.76	0.0353	53.54	0.8718	20.59	0.4786	0.0856	22.14	0.0061	0.9411	98.6886	0.0182581	0.645159	0.336583
	Domes	Eastern Dome U9	58.26	0.0349	53.24	1.1208	21.02	0.8177	0.173	22.91	0.0275	0.6485	99.9954	0.0226861	0.645219	0.332095
	Domes	Eastern Dome U9	32.35	0.023	53.58	0.685	21.44	0.5353	0.07	22.77	0.0317	1.111	100.253	0.0139506	0.64523	0.340819
	Domes	Eastern Dome U9	29.32	0.0274	53.18	1.0683	21.11	0.7398	0.0901	22.95	0.0417	0.9912	100.211	0.0215913	0.645387	0.333022
	Domes	Eastern Dome U9	49.8	0.0523	53.57	0.6905	20.62	0.5414	0.0712	22	0.0153	0.98	98.5567	0.0145687	0.645849	0.339582
	Domes	Eastern Dome U9	1	0.0314	53.56	1.2182	20.99	0.3478	0.1811	23.13	0.0267	0.5933	100.09	0.0244693	0.646442	0.329089
	Domes	Eastern Dome U9	42.84	0.0262	53.55	0.6684	21.56	0.572	0.076	23.13	0.0257	0.9591	100.576	0.0134541	0.647806	0.338739
	Domes	Eastern Dome U9	32.38	0.0227	53.49	0.6798	21.55	0.5295	0.0863	23.14	0.005	0.8917	100.399	0.0136788	0.647858	0.338463
	Domes	Eastern Dome U9	69.32	0.0745	53.4	0.7425	20.5	0.6136	0.0887	22.15	0.0069	0.944	98.5203	0.0156108	0.647969	0.33642
	Domes	Eastern Dome U9	126.52	0.0104	53.63	0.7926	21.33	0.5007	0.0863	23.09	0	1.0673	100.516	0.0159898	0.648134	0.335876
	Domes	Eastern Dome U9	26.8	0.0213	53	0.7979	20.17	0.8349	0.0795	21.95	0.023	0.9442	97.8239	0.0169468	0.648671	0.334382
	Domes	Eastern Dome U9	59.56	0.0387	53.48	0.7163	20.55	0.5631	0.079	22.24	0.0007	0.9347	98.6026	0.0150164	0.648719	0.336265
	Domes	Eastern Dome U9	21.92	0.0412	53.56	0.6928	21.28	0.589	0.0936	22.98	0.0077	0.8732	100.122	0.0140593	0.648867	0.337074
	Domes	Eastern Dome U9	79.08	0.0027	53.36	0.7614	20.41	0.8321	0.0905	22.17	0.0039	0.8869	98.5207	0.0160161	0.648875	0.335109
	Domes	Eastern Dome U9	63.76	0.0325	53.2	0.8772	21.11	0.7758	0.1081	23.07	0.0234	1.033	100.231	0.0177377	0.649078	0.333185
	Domes	Eastern Dome U9	119.03	0.0531	52.99	0.9063	21.05	0.7295	0.1431	23.05	0.0222	0.7123	99.6609	0.018343	0.649113	0.332544
	Domes	Eastern Dome U9	108.3	0.0497	53.1	0.8874	21.13	0.7137	0.1516	23.13	0.0038	0.722	99.8969	0.0179044	0.649331	0.332765
	Domes	Eastern Dome U9	66.92	0.0565	52.62	0.9372	20.85	1.0461	0.1953	22.92	0.0441	0.6355	99.3139	0.0190866	0.649476	0.331438
	Domes	Eastern Dome U9	117.1	0.0588	53.33	0.7178	20.97	0.7509	0.1126	22.78	0.0195	0.8487	99.5884	0.0147145	0.64975	0.335535
	Domes	Eastern Dome U9	26.5	0.0457	53.59	1.081	20.76	0.6839	0.158	23.09	0	0.6496	100.063	0.0218771	0.650187	0.327936
	Domes	Eastern Dome U9	84.68	0.0315	53.54	0.9062	21.13	0.6142	0.0683	23.25	0.0192	1.0428	100.605	0.0182154	0.650262	0.331522
	Domes	Eastern Dome U9	35	0.016	53.65	1.027	20.91	0.6439	0.1381	23.2	0.0104	0.6543	100.25	0.0206937	0.650439	0.328867
	Domes	Eastern Dome U9	84.6	0.0042	53.41	0.8817	20.98	0.6256	0.0792	23.08	0	0.9732	100.034	0.0178587	0.650452	0.33169
	Domes	Eastern Dome U9	126.4	0.0276	53.53	0.7275	21.03	0.4958	0.0937	22.95	0.0306	0.9549	99.8489	0.0148243	0.65069	0.334486
	Domes	Eastern Dome U9	1	0.0558	53.49	1.0715	20.75	0.8935	0.1825	23.12	0.0076	0.6669	100.247	0.0216741	0.65071	0.327616
	Domes	Eastern Dome U9	97.57	0.0184	53	0.863	20.99	0.7107	0.1656	23.12	0.0016	0.714	99.5922	0.0174641	0.650989	0.331547
	Domes	Eastern Dome U9	129.76	0	52.71	0.8875	20.89	0.7676	0.1214	23.06	0.004	0.7011	99.1502	0.0180098	0.651105	0.330885
	Domes	Eastern Dome U9	75.16	0.046	53.12	0.8768	20.95	0.8598	0.1507	23.15	0.0323	0.6103	99.796	0.0177346	0.651513	0.330753
	Domes	Eastern Dome U9	115.95	0.0254	53.72	0.7163	21.19	0.5088	0.0641	23.19	0.0149	1.0508	100.481	0.0144641	0.651551	0.333985
	Domes	Eastern Dome U9	38.76	0.0412	53.03	1.044	20.71	0.8111	0.0967	23.14	0.0199	0.9667	99.9277	0.021131	0.65168	0.327189
	Domes	Eastern Dome U9	65.38	0.0086	52.71	0.8531	20.78	0.7701	0.1329	23.04	0	0.7276	99.0295	0.0173639	0.652501	0.330135
	Domes	Eastern Dome U9	151.22	0.0177	53	0.8332	21.07	0.6497	0.1667	23.32	0.0117	0.7284	99.8022	0.0167556	0.652514	0.33073
	Domes	Eastern Dome U9	76.11	0.0363	53.09	0.8189	20.98	0.7696	0.1497	23.21	0.0091	0.7153	99.7877	0.0165471	0.652555	0.330898
	Domes	Eastern Dome U9	147.44	0.0281	53.65	0.6849	21.18	0.4194	0.0785	23.28	0.0267	1.0564	100.413	0.0138061	0.652946	0.333248
	Domes	Eastern Dome U9	11.46	0.0618	53.49	0.7192	21.18	0.5636	0.0882	23.34	0.0004	0.8786	100.322	0.0144632	0.653078	0.332459
	Domes	Eastern Dome U9	105.5	0.0035	53.79	0.714	21.11	0.5105	0.1039	23.27	0.0313	0.9799	100.513	0.0144041	0.653185	0.332411
	Domes	Eastern Dome U9	22.46	0.0162	52.97	0.8705	20.9	0.5948	0.142	23.28	0.0317	0.8518	99.6584	0.017559	0.65338	0.329061
	Domes	Eastern Dome U9	54.65	0.0049	52.96	0.9014	20.74	0.693	0.1403	23.17	0.0232	0.7956	99.4285	0.0182734	0.653549	0.328177
	Domes	Eastern Dome U9	33.82	0.0244	53.87	0.8643	20.21	0.4849	0.0761	22.56	0.0195	0.9046	99.0139	0.0179954	0.653561	0.328444
	Domes	Eastern Dome U9	36.76	0.0191	53.16	0.9421	20.78	1.1278	0.1708	23.27	0.0502	0.7088	100.236	0.0190171	0.653574	0.327409
	Domes	Eastern Dome U9	36.1	0.0334	53.21	1.141	20.51	0.7446	0.1917	23.28	0.0054	0.5947	99.7192	0.0230311	0.653827	0.323142
	Domes	Eastern Dome U9	86.84	0.0402	53.15	0.8528	20.9	0.734	0.1554	23.32	0.011	0.7399	99.9034	0.0171888	0.654002	0.328809
	Domes	Eastern Dome U9	67.08	0.0147	53.8	0.9151	20.9	0.3791	0.0278	23.41	0.0048	0.9339	100.395	0.0183751	0.654054	0.327571
	Domes	Eastern Dome U9	140.49	0.0564	53.04	0.8623	20.99	0.742	0.1219	23.44	0.0343	0.7154	100.004	0.0172943	0.654114	0.328591
	Domes	Eastern Dome U9	16.3	0.0648	52.55	1.1802	20.25	1.7903	0.2609	23.09	0.0188	0.5399	99.745	0.02403	0.654144	0.321826
	Domes	Eastern Dome U9	83.4	0.0968	53.03	0.7696	20.88	0.8254	0.1182	23.21	0.0278	0.6863	99.6455	0.015591	0.654238	0.330171
	Domes	Eastern Dome U9	1	0.0359	52.74	1.2181	20.16	1.2165	0.2716	23.08	0.0129	0.5268	99.2832	0.0248251	0.654477	0.320698
	Domes	Eastern Dome U9	136.98	0.0384	53.69	0.7072	21.04	0.4508	0.0501	23.32	0.0131	1.0549	100.37	0.0142646	0.654481	0.331254
	Domes	Eastern Dome U9	19.88	0.0682	53.41	0.9608	20.68	0.7204	0.0944	23.33	0.0221	0.9501	100.247	0.0193851	0.65494	0.325675
	Domes	Eastern Dome U9	85.96	0.0319	53.62	0.7901	20.88	0.4738	0.0828	23.34	0.0199	0.9782	100.222	0.0159413	0.655229	0.328829
	Domes	Eastern Dome U9	1	0	53.66	0.8487	20.02	0.8068	0.113	22.51	0.0278	0.6796	98.67	0.0177569	0.655298	0.326945
	Domes	Eastern Dome U9	76.52	0.0275	53.7	0.8431	20.78	0.4774	0.0568	23.34	0.0084	1.0413	100.281	0.0170192	0.655561	0.32742
	Domes	Eastern Dome U9	45.7	0.0427	53.63	0.7074	20.95	0.4869	0.0621	23.38	0.0059	0.9852	100.25	0.0142648	0.655987	0.329748
	Domes	Eastern Dome U9	99.88	0.0129	53.32	0.6844	20.82	0.8169	0.1109	23.23	0.0247	0.6339	99.6538	0.0138943	0.656187	0.329919
	Domes	Eastern Dome U9	43.92	0.0414	52.89	0.8955	20.59	0.6546	0.1088	23.29	0.0345	0.8116	99.323	0.0181376	0.656349	0.325514
	Domes	Eastern Dome U9	33.19	0.0083	53.14	0.9146	20.63	0.5755	0.0992	23.36	0.0212	0.7878	99.5475	0.0184692	0.656358	0.325173
	Domes	Eastern Dome U9	1	0.0436	52.36	1.3373	19.86	2.08	0.2975	23.12	0.005	0.5075	99.6283	0.0272874	0.656404	0.316308
	Domes	Eastern Dome U9	66.64	0.0095	53.51	0.6892	20.11	0.6445	0.0905	22.5	0.0281	0.8616	98.4472	0.0144509	0.656424	0.329125
	Domes	Eastern Dome U9	54.64	0.0223	53.75	0.6949	20.96	0.461	0.091	23.42	0.0105	1.0554	100.477	0.0139983	0.656435	0.329567
	Domes	Eastern Dome U9	91.64	0.023	53.09	0.6361	20.96	0.811	0.0946	23.34	0.0088	0.6533	99.6235	0.0128579	0.656442	0.3307
	Domes	Eastern Dome U9	1	0.0286	53.26	0.7234	20.95	0.6828	0.0928	23.45	0.0236	0.8195	100.037	0.0145541	0.65645	0.328996
	Domes	Eastern Dome U9	57.64	0.033	53.28	1.0341	20.5	0.7855	0.1639	23.41	0.0463	0.7708	100.04	0.0208455	0.656601	0.322553
	Domes	Eastern Dome U9	50.08	0.0495	53.25	1.0606	20.48	0.8324	0.1461	23.43	0.0005	0.6618	99.9119	0.021363	0.65665	0.321987
	Domes	Eastern Dome U9	1	0.0284	53.32	0.839	19.81	0.6737	0.1166	22.41	0.0219	0.7297	97.9493	0.0176696	0.656684	0.325647
	Domes	Eastern Dome U9	11.94	0.0528	53	1.1092	19.52	1.1204	0.2382	22.48	0.1646	0.6322	98.3193	0.0232908	0.656782	0.319928
	Domes	Eastern Dome U9	89.47	0.0287	53.23	1.3305	20.09	0.9094	0.198	23.41	0	0.672	99.8686	0.0268331	0.656914	0.316253
	Domes	Eastern Dome U9	1	0.0471	53.15	1.0947	20.16	1.0256	0.1449	23.19	0.0415	0.5304	99.4016	0.0222967	0.657199	0.320504
	Domes	Eastern Dome U9	108.12	0.019	53.18	0.7602	20.68	0.8277	0.1066	23.3	0.0469	0.6503	99.5743	0.0154132	0.657311	0.327275
	Domes	Eastern Dome U9	17.48	0.0473	53.24	1.1097	20.16	0.9804	0.1782	23.23	0.0318	0.5693	99.5468	0.0225697	0.657386	0.320044
	Domes	Eastern Dome U9	13.9	0	53.37	0.7768	19.7	0.5888	0.0887	22.28	0.013	0.8277	97.6478	0.0164737	0.657429	0.326097
	Domes	Eastern Dome U9	9.24	0.0362	53.04	1.0928	20.21	0.9876	0.1685	23.29	0.0128	0.5608	99.3988	0.0221784	0.657672	0.32015
	Domes	Eastern Dome U9	11.73	0.0564	53.14	0.7944	20.74	0.5375	0.101	23.47	0.0225	0.8542	99.7227	0.0160035	0.657871	0.326125
	Domes	Eastern Dome U9	47.8	0.0516	53.33	1.0771	20.26	0.7351	0.1577	23.39	0.0153	0.6407	99.6798	0.0217879	0.658325	0.319887
	Domes	Eastern Dome U9	50.44	0.0239	53.07	0.8458	20.49	0.7602	0.1055	23.32	0.0217	0.6181	99.2605	0.0171609	0.658341	0.324498
	Domes	Eastern Dome U9	58.68	0.018	53.2	0.9669	20.4	0.7659	0.1345	23.4	0.0584	0.573	99.5173	0.0195536	0.658433	0.322013
	Domes	Eastern Dome U9	99.46	0.0019	53.55	0.7704	19.9	0.7424	0.0538	22.61	0.0286	0.9084	98.5656	0.0161297	0.658662	0.325209
	Domes	Eastern Dome U9	42.2	0.0406	53.35	0.8513	20.49	0.7563	0.1183	23.37	0.0221	0.588	99.5867	0.0172462	0.658749	0.324004
	Domes	Eastern Dome U9	95.05	0.0081	53.82	0.7127	20.71	0.4468	0.0592	23.47	0	0.9635	100.198	0.0143881	0.659267	0.326344
	Domes	Eastern Dome U9	99.34	0.0839	53.72	0.6732	20.77	0.445	0.0446	23.52	0	1.0071	100.265	0.0135696	0.659648	0.326783
	Domes	Eastern Dome U9	1	0.0673	52.82	1.2005	20	1.242	0.228	23.42	0.0091	0.5086	99.508	0.0243026	0.659674	0.316024
	Domes	Eastern Dome U9	81.46	0.0276	53.65	0.7882	20.57	0.6593	0.0719	23.47	0.0311	0.8711	100.142	0.0159232	0.659717	0.324359
	Domes	Eastern Dome U9	9.94	0.065	53.58	0.9913	20.36	0.4312	0.1276	23.54	0.0194	0.607	99.7234	0.0199711	0.659864	0.320165
	Domes	Eastern Dome U9	48.2	0	53.54	0.9741	20.44	0.6209	0.0848	23.66	0.0363	0.7812	100.137	0.0195411	0.660405	0.320054
	Domes	Eastern Dome U9	1	0.0237	53.7	0.8084	20.46	0.1564	0.0768	23.47	0.0428	0.6264	99.365	0.016353	0.660594	0.323053
	Domes	Eastern Dome U9	1	0.0567	53.62	0.7512	20.66	0.6058	0.11	23.65	0.0293	0.8424	100.325	0.0150892	0.660989	0.323922
	Domes	Eastern Dome U9	22.88	0.0575	53.58	0.7404	19.84	0.6347	0.078	22.76	0.0302	0.7093	98.4395	0.0154589	0.661206	0.323335
	Domes	Eastern Dome U9	23.95	0.0262	52.57	1.1731	19.86	2	0.2745	23.39	0.0459	0.4654	99.8052	0.023834	0.661217	0.314949
	Domes	Eastern Dome U9	116.36	0.0107	53.28	0.7693	20.43	0.8408	0.1146	23.47	0.0309	0.5725	99.5189	0.0155817	0.66143	0.322988
	Domes	Eastern Dome U9	33.96	0.0575	53.23	0.9545	20.11	0.842	0.1486	23.42	0.0126	0.613	99.3922	0.0193855	0.661819	0.318795
	Domes	Eastern Dome U9	90.4	0.0392	53.67	0.9477	20.33	0.6693	0.0888	23.66	0.0329	0.7795	100.217	0.0190544	0.661895	0.31905
	Domes	Eastern Dome U9	10.44	0.0415	53.62	0.7578	20.52	0.5864	0.0901	23.74	0.0226	0.8969	100.282	0.0152149	0.663204	0.321581
	Domes	Eastern Dome U9	1	0.049	53.63	0.805	20.41	0.6039	0.0945	23.8	0.0191	0.6978	100.11	0.0161481	0.664282	0.31957
	Domes	Eastern Dome U9	11.58	0.039	52.96	1.0865	20	1.0358	0.1971	23.76	0.0637	0.5505	99.6926	0.0218361	0.664421	0.313743
	Domes	Eastern Dome U9	1	0.0445	53.35	1.0944	19.84	1.0584	0.1676	23.63	0.047	0.5646	99.8011	0.0221274	0.664765	0.313108
	Domes	Eastern Dome U9	77.58	0.04	53.85	0.7301	19.59	0.6179	0.075	22.86	0.0276	0.7311	98.5218	0.015265	0.665031	0.319704
	Domes	Eastern Dome U9	25.72	0.0588	53.42	0.9493	19.99	0.8179	0.119	23.64	0.0316	0.5568	99.5964	0.0191991	0.665236	0.315565
	Domes	Eastern Dome U9	41.9	0.4785	57.3	1.0158	17.05	2.11	0.2463	20.47	0.0145	0.5486	100.118	0.0237303	0.665371	0.310898
	Domes	Eastern Dome U9	43.32	0.0402	53.34	1.0416	19.99	1.0652	0.179	23.8	0.0424	0.5657	100.064	0.0209325	0.6655	0.313568
	Domes	Eastern Dome U9	53.9	0.0348	53.06	1.0329	19.95	1.0634	0.1615	23.85	0.066	0.5624	99.7874	0.0207453	0.666501	0.312754
	Domes	Eastern Dome U9	32.74	0.0266	53.53	1.001	19.96	0.9527	0.1936	23.83	0.0464	0.5723	100.119	0.0201256	0.666637	0.313237
	Domes	Eastern Dome U9	88.52	0.0109	53.72	0.6913	19.49	0.6709	0.0865	22.92	0.0443	0.7255	98.3611	0.0144639	0.667242	0.318294
	Domes	Eastern Dome U9	31.6	0.0521	52.62	1.1985	19.47	2.05	0.2842	23.66	0.0201	0.4576	99.8145	0.0243024	0.667539	0.308159
	Domes	Eastern Dome U9	96.22	0.0681	53.06	1.0506	19.89	1.3215	0.208	23.93	0.0811	0.536	100.159	0.021066	0.667635	0.311299
	Domes	Eastern Dome U9	63.58	0	53.89	0.7449	20.27	0.5743	0.087	23.93	0.0071	0.8463	100.35	0.014939	0.667756	0.317305
	Domes	Eastern Dome U9	9.5	0.037	53.52	1.1583	19.74	0.9394	0.2264	23.94	0.0064	0.5447	100.12	0.0232235	0.667853	0.308924
	Domes	Eastern Dome U9	22.16	0.103	53.13	1.0547	19.96	1.0156	0.1597	24.08	0.0549	0.5486	100.106	0.0210354	0.668236	0.310729
	Domes	Eastern Dome U9	27.82	0.0315	53.22	0.9153	19.99	1.0769	0.1718	23.93	0.0986	0.6557	100.101	0.0183742	0.668402	0.313224
	Domes	Eastern Dome U9	39.25	0.0765	52.69	1.2124	19.35	2.08	0.2627	23.71	0.0099	0.4614	99.8594	0.0245893	0.669088	0.306323
	Domes	Eastern Dome U9	18.88	0.0664	53.46	1.0239	19.75	1.0627	0.1792	23.92	0.0418	0.5993	100.109	0.0205925	0.669367	0.31004
	Domes	Eastern Dome U9	33.72	0	53.46	1.245	19.39	1.1053	0.2606	23.94	0.0038	0.5741	99.9854	0.0250554	0.670359	0.304585
	Domes	Eastern Dome U9	72.52	0.0453	54.06	0.8094	19.98	0.5809	0.0913	23.99	0.0061	0.7175	100.28	0.0162581	0.670484	0.313257
	Domes	Eastern Dome U9	64.48	0.0398	53.33	1.0064	19.62	1.0296	0.1924	23.91	0.0467	0.5569	99.7362	0.0202948	0.67088	0.308825
	Domes	Eastern Dome U9	7.16	0.0683	52.35	1.2261	19.13	2.07	0.3385	23.71	0.0035	0.4521	99.3676	0.0249471	0.671239	0.303814
	Domes	Eastern Dome U9	1	0.1012	52.8	2.04	17.74	1.99	0.4037	23.48	0.0269	0.4611	99.0623	0.0420126	0.672819	0.285168
	Domes	Eastern Dome U9	54.55	0.0141	52.66	1.2033	19.11	2.08	0.2497	24	0.0018	0.4282	99.7472	0.0243027	0.674439	0.301259
	Domes	Eastern Dome U9	46.9	0.0381	52.5	1.1959	19.04	2.11	0.2769	23.92	0.0027	0.4227	99.5064	0.0242381	0.674552	0.30121
	Domes	Eastern Dome U9	85.15	0.0412	52.68	1.1648	19.05	2.1	0.3464	24.1	0.0115	0.4357	99.9321	0.0234996	0.676514	0.299987
	Domes	Eastern Dome U9	69.85	0.0119	52.66	1.2002	19.02	1.8752	0.2714	24.12	0.0304	0.4671	99.6563	0.0241943	0.676532	0.299274
	Domes	Eastern Dome U9	77.5	0.0475	53.06	1.0058	19.43	1.5361	0.2067	24.31	0.0142	0.4881	100.111	0.0201173	0.676542	0.30334
	Domes	Eastern Dome U9	62.2	0.0578	52.57	1.2517	18.95	2.07	0.3161	24.23	0.0246	0.4424	99.9127	0.0251565	0.677569	0.297274
	Domes	Eastern Dome U9	12.7	0.0446	53.38	1.2132	18.86	1.2637	0.198	24.08	0.0065	0.492	99.5495	0.0245393	0.677699	0.297762
	Domes	Eastern Dome U9	75.06	0.0683	53.27	1.1487	19.09	1.2408	0.1988	24.37	0.0707	0.552	100.009	0.0229935	0.678742	0.298265
	Domes	Eastern Dome U9	36.82	0.0858	53.24	1.0705	18.91	1.3872	0.2292	24.22	0	0.4801	99.6355	0.0216131	0.680385	0.298002
	Domes	Eastern Dome U9	25.54	0.0687	53.66	1.2184	18.75	0.8963	0.2476	24.58	0	0.5953	100.025	0.0243416	0.68327	0.292388
	Domes	Eastern Dome U9	1	0.0819	52.42	1.2529	18.32	2.37	0.3306	24.25	0.0058	0.412	99.4557	0.025417	0.684494	0.290089
	Domes	Eastern Dome U9	9.18	0.0137	52.33	1.2313	18.08	2.71	0.2996	24.4	0.0266	0.3987	99.5048	0.0249789	0.688731	0.28629
	Domes	Eastern Dome U9	85.64	0.0846	53.58	1.299	18.24	1.3022	0.2392	24.79	0.1292	0.4427	100.11	0.025965	0.689456	0.284579
	Domes	Eastern Dome U9	71.83	0.0442	53.72	1.1013	18.22	1.1176	0.1593	24.96	0.0044	0.4488	99.7815	0.0220031	0.693862	0.284135
	Domes	Eastern Dome U9	63.96	0.0556	53.73	1.73	17.14	1.2172	0.1822	25.2	0.0159	0.394	99.6782	0.0344816	0.698863	0.266655
	Domes	Eastern Dome U9	32.84	0.028	52.74	1.1431	17.59	2.45	0.3017	24.84	0.0194	0.4094	99.5266	0.0231232	0.699143	0.277733
	Domes	Eastern Dome U9	17.36	0.0157	53.98	1.288	17.49	1.0685	0.1921	25.43	0.0067	0.5062	99.9881	0.0255947	0.703123	0.271283
	Domes	Eastern Dome U9	8.87	0.0523	52.39	1.3588	17.09	2.54	0.292	25.11	0.0201	0.3498	99.2204	0.0273751	0.703879	0.268745
	Domes	Eastern Dome U9	1	0.0494	52.04	1.49	16.72	3.67	0.4033	24.96	0	0.2924	99.6467	0.0302415	0.704877	0.264882
	Domes	Eastern Dome U9	16.74	0.0507	52.09	1.43	16.76	3.41	0.3342	24.96	0.0131	0.3204	99.3764	0.0290407	0.705289	0.265671
	Domes	Eastern Dome U9	56.09	0.0557	53.66	1.78	16.33	1.743	0.202	25.73	0.0022	0.3543	99.8573	0.0353687	0.711361	0.25327
	Domes	Eastern Dome U9	48.22	0.0625	52.01	1.64	16.19	3.84	0.3031	25.32	0.0275	0.3014	99.7074	0.0331265	0.711617	0.255257
	Domes	Eastern Dome U9	24.61	0.0498	52.25	1.51	16.2	3.44	0.3414	25.56	0.0086	0.3308	99.6993	0.0303707	0.715303	0.254326
	Domes	Eastern Dome U9	13.32	0.0707	52.82	1.2794	16.19	2.8	0.2833	25.68	0.0255	0.3035	99.4561	0.0257697	0.719695	0.254535
	Domes	Eastern Dome U9	40.35	0.067	52.15	1.47	15.72	3.88	0.3308	25.62	0.0155	0.2841	99.5505	0.0297645	0.72179	0.248446
	Domes	Eastern Dome U9	32.48	0.0043	52.32	1.53	15.57	3.62	0.3419	25.87	0.0149	0.2878	99.5673	0.030798	0.724567	0.244635
	Domes	Eastern Dome U9	56.44	0.0543	53.13	1.52	15.69	2.53	0.3283	26.16	0.0177	0.3558	99.793	0.0302996	0.725574	0.244126
	Domes	Eastern Dome U9	28.86	0.0546	53.01	1.1542	15.75	2.56	0.2539	26.07	0.0235	0.3114	99.192	0.0232133	0.729538	0.247249
	Domes	Eastern Dome U9	4.98	0.0452	52.62	1.58	15.26	3.34	0.3022	26.18	0.0167	0.3038	99.6592	0.031652	0.729734	0.238614
	Domes	Eastern Dome U9	62.6	0.052	53.92	1.57	15.32	1.7697	0.2208	26.68	0.0324	0.3397	99.9047	0.0309968	0.732915	0.236088
	Domes	Eastern Dome U9	20.9	0.0524	53.03	1.68	14.45	2.97	0.2291	26.57	0.061	0.2965	99.3475	0.0336483	0.74045	0.225902
	Domes	Eastern Dome U9	16.92	0.0773	53.75	1.85	14.26	2.14	0.2306	26.98	0.0989	0.2989	99.6902	0.0366188	0.743063	0.220318
	Domes	Eastern Dome U9	24.88	0.0359	54.05	1.2088	14.82	1.7577	0.176	27.13	0.0243	0.3402	99.544	0.0239248	0.747126	0.228949
	Domes	Eastern Dome U9	12.94	0.0662	53.44	1.6	13.95	2.53	0.2434	26.99	0.0525	0.2435	99.1314	0.0319729	0.750439	0.217588
	Domes	Eastern Dome U9	8.96	0.0512	53.29	1.46	14.01	2.77	0.2347	27	0.0011	0.267	99.0994	0.0292215	0.751908	0.21887
	Domes	Eastern Dome U9	19.48	0.0599	52.94	1.5	13.95	3.6	0.2854	27.01	0.0225	0.2807	99.6486	0.0300179	0.75208	0.217902
	Domes	Eastern Dome U9	68.76	0.0392	54.11	1.9	13.23	2.01	0.2505	27.89	0.0496	0.2572	99.7366	0.0372311	0.760416	0.202353
	Domes	Eastern Dome U9	50.28	0.0518	54.44	1.78	13.1	1.7275	0.2263	27.81	0.0346	0.2665	99.4441	0.0351086	0.763212	0.20168
	Domes	Eastern Dome U9	25.64	0.0625	53.9	1.3373	12.08	2.68	0.2033	28.96	0.0517	0.2501	99.5314	0.0261902	0.789149	0.184661
	Domes	Eastern Dome U9	44.12	0.0695	54.39	1.48	11.54	2.59	0.228	29.18	0.0359	0.2204	99.7338	0.0289694	0.794719	0.176312
	Domes	Eastern Dome U9	37.96	0.0162	54.01	1.43	11.37	2.8	0.2325	29.35	0.0698	0.2419	99.5251	0.0279612	0.798507	0.173532
	Domes	Eastern Dome U9	31.8	0.0231	54.34	1.3203	11.33	2.64	0.2246	29.21	0.0397	0.2572	99.3911	0.0259868	0.799949	0.174064
	Recent Nevado	Ombligo	1	0.0263	45.93	8.2	23.19	0.5746	0.0828	16.55	0	0.5987	95.2084	0.166233	0.466822	0.366945
	Recent Nevado	Ombligo	42.78	0.0231	52.74	0.6123	27.41	0.6946	0.1016	19.1	0.0017	0.6907	101.378	0.0126032	0.547019	0.440378
	Recent Nevado	Ombligo	50.56	0.0057	52.28	1.1722	26.01	0.9338	0.0894	18.96	0	0.5895	100.046	0.0244948	0.551266	0.424239
	Recent Nevado	Ombligo	13.39	0	53.17	0.8007	26.41	0.4723	0.0862	18.94	0.0079	0.6242	100.523	0.0167623	0.551689	0.431549
	Recent Nevado	Ombligo	61.05	0.0083	51.96	0.6316	27.05	1.3109	0.12	19.28	0	0.6434	101.004	0.0130035	0.552302	0.434695
	Recent Nevado	Ombligo	43.48	0.0053	52.64	0.5329	27.2	0.9007	0.0896	19.34	0.0038	0.6565	101.369	0.0109485	0.552861	0.43619
	Recent Nevado	Ombligo	133.11	0.0165	52.06	0.8444	26.8	1.4429	0.1541	19.38	0.0356	0.6428	101.38	0.0173287	0.55338	0.429291
	Recent Nevado	Ombligo	1	0.0219	52.09	0.6516	26.55	1.5432	0.1206	19.13	0.0183	0.6607	100.795	0.0135771	0.554616	0.431807
	Recent Nevado	Ombligo	38.17	0.0341	53.1	0.9155	26.11	0.5498	0.1197	19.06	0.0078	0.5975	100.505	0.0191465	0.554631	0.426222
	Recent Nevado	Ombligo	75.34	0.0093	52.9	0.6537	27.02	0.4938	0.0599	19.47	0.0125	0.682	101.301	0.013386	0.55474	0.431874
	Recent Nevado	Ombligo	7.14	0.0564	52.54	0.8021	26.77	0.9719	0.1468	19.47	0.029	0.6185	101.405	0.0164406	0.555272	0.428288
	Recent Nevado	Ombligo	73.06	0	52.51	0.5493	27.15	0.9235	0.088	19.54	0.0139	0.6731	101.45	0.0112265	0.55566	0.433114
	Recent Nevado	Ombligo	1	0.0187	53.35	0.7594	26.05	0.5231	0.0698	18.96	0	0.6259	100.38	0.0159963	0.555697	0.428307
	Recent Nevado	Ombligo	64.72	0.0092	52.81	0.6859	26.74	0.7642	0.0704	19.42	0.0077	0.6619	101.174	0.0141194	0.556231	0.42965
	Recent Nevado	Ombligo	22.24	0.0611	52.7	0.7011	26.74	0.9282	0.1291	19.46	0.0092	0.67	101.403	0.0144113	0.556565	0.429024
	Recent Nevado	Ombligo	85.07	0.0007	52.37	0.618	27	0.8685	0.1116	19.59	0.004	0.6994	101.263	0.0126251	0.556841	0.430534
	Recent Nevado	Ombligo	32.86	0	52.5	0.7375	26.65	1.0902	0.1273	19.53	0	0.6005	101.235	0.0151397	0.557838	0.427022
	Recent Nevado	Ombligo	27.43	0.0196	51.98	0.6577	26.45	1.7634	0.1085	19.34	0.0282	0.6323	100.984	0.0136416	0.558143	0.428215
	Recent Nevado	Ombligo	25.78	0.0318	53.24	0.8034	26.22	0.4987	0.0826	19.35	0.0034	0.6842	100.917	0.0166705	0.558662	0.424667
	Recent Nevado	Ombligo	169.14	0.0274	52.61	0.7275	26.58	0.9993	0.1202	19.61	0.0168	0.666	101.357	0.0149201	0.559587	0.425493
	Recent Nevado	Ombligo	1	0.0117	52.7	0.7345	26.57	0.8808	0.1341	19.61	0.0059	0.6654	101.322	0.0150639	0.559596	0.42534
	Recent Nevado	Ombligo	181.15	0.0476	52.42	0.6937	26.6	1.0989	0.1092	19.61	0	0.6944	101.274	0.0142322	0.559796	0.425972
	Recent Nevado	Ombligo	145.12	0.018	52.35	0.6973	26.74	0.8303	0.0795	19.79	0.0033	0.6352	101.144	0.0142002	0.560754	0.425046
	Recent Nevado	Ombligo	1	0.0525	53.15	0.6323	26.4	0.4611	0.0891	19.52	0.0237	0.7049	101.044	0.0130644	0.561173	0.425763
	Recent Nevado	Ombligo	84.56	0.0513	53.06	0.6073	26.66	0.5849	0.0891	19.7	0.0095	0.6627	101.425	0.0124377	0.561378	0.426184
	Recent Nevado	Ombligo	97.08	0.02	52.9	0.6823	26.74	0.698	0.0789	19.84	0.0283	0.6357	101.623	0.0138793	0.561547	0.424574
	Recent Nevado	Ombligo	121.1	0.0147	52.68	0.6822	26.55	0.9675	0.1122	19.71	0.0203	0.6511	101.388	0.0139709	0.561629	0.4244
	Recent Nevado	Ombligo	109.09	0.0399	52.35	0.6392	26.62	0.874	0.0965	19.73	0.0016	0.6775	101.03	0.0130797	0.561745	0.425175
	Recent Nevado	Ombligo	54.1	0.0132	52.97	0.7508	26.54	0.8031	0.1044	19.82	0.0297	0.6695	101.701	0.0153087	0.562301	0.42239
	Recent Nevado	Ombligo	157.13	0.0555	52.82	0.6652	26.55	0.7127	0.0686	19.82	0.0127	0.6709	101.376	0.0135849	0.563195	0.423221
	Recent Nevado	Ombligo	1	0.0302	52.53	0.8038	26.03	1.1864	0.1256	19.6	0.0039	0.6458	100.978	0.0166099	0.563542	0.419848
	Recent Nevado	Ombligo	49.04	0.0383	52.71	0.62	26.51	0.9075	0.1292	19.79	0	0.6398	101.345	0.0126924	0.563702	0.423605
	Recent Nevado	Ombligo	62.95	0.0129	52.92	0.8582	25.67	0.9229	0.1259	19.42	0.0094	0.5711	100.51	0.0179106	0.563926	0.418164
	Recent Nevado	Ombligo	8.35	0.0213	52.94	0.7393	26.06	0.9607	0.1173	19.62	0.0077	0.6409	101.121	0.0152813	0.564272	0.420447
	Recent Nevado	Ombligo	168.12	0	52.6	0.4724	26.52	1.2743	0.1151	19.74	0.0151	0.6249	101.366	0.00971244	0.564698	0.425589
	Recent Nevado	Ombligo	11.13	0	53.54	0.7463	26.08	0.5961	0.0833	19.7	0.0132	0.6639	101.435	0.0153834	0.565009	0.419608
	Recent Nevado	Ombligo	37.03	0.0159	52.79	0.7324	26.29	0.9618	0.1573	19.9	0.0183	0.6246	101.49	0.0149647	0.56575	0.419285
	Recent Nevado	Ombligo	1	0.027	52.92	0.7362	26.13	0.9183	0.091	19.85	0.0122	0.6441	101.347	0.0151012	0.566536	0.418363
	Recent Nevado	Ombligo	126.34	0.039	53.22	0.4997	26.51	0.4817	0.0673	19.95	0	0.6844	101.454	0.0102083	0.567072	0.42272
	Recent Nevado	Ombligo	21.26	0.0476	53.26	0.7072	25.99	0.603	0.0792	19.78	0.0048	0.6844	101.156	0.0145768	0.56728	0.418143
	Recent Nevado	Ombligo	209.9	0	52.55	0.4974	26.27	1.2599	0.1188	19.81	0.012	0.6043	101.124	0.0102418	0.56755	0.422209
	Recent Nevado	Ombligo	193.16	0.0246	52.36	0.6546	26.26	1.0696	0.119	19.97	0	0.6399	101.098	0.0133761	0.567784	0.418839
	Recent Nevado	Ombligo	15.7	0.0038	53.11	0.8274	25.94	0.9865	0.143	19.92	0.0232	0.6362	101.591	0.0169579	0.568064	0.414978
	Recent Nevado	Ombligo	9.81	0	53.26	0.7037	26.2	0.5058	0.057	20	0	0.6161	101.353	0.0143665	0.568126	0.417507
	Recent Nevado	Ombligo	87.73	0.0227	52.79	0.8342	25.41	0.9972	0.1338	19.58	0.0201	0.5476	100.34	0.0174113	0.568623	0.413965
	Recent Nevado	Ombligo	11.62	0.0017	52.99	0.6893	25.96	0.8556	0.1086	19.85	0.0012	0.6323	101.099	0.0141915	0.56863	0.417178
	Recent Nevado	Ombligo	75.34	0	52.81	0.8239	25.41	0.9841	0.1417	19.58	0.0272	0.5859	100.365	0.0172	0.568746	0.414054
	Recent Nevado	Ombligo	293.46	0.0282	52.7	0.4856	26.23	1.2611	0.0886	19.89	0.0086	0.5846	101.283	0.00998475	0.569042	0.420974
	Recent Nevado	Ombligo	335.24	0	52.53	0.5105	26.22	1.3455	0.1122	19.93	0.0222	0.5597	101.231	0.0104811	0.569334	0.420185
	Recent Nevado	Ombligo	100.12	0	52.83	0.8412	25.47	1.0065	0.1539	19.69	0.0312	0.5888	100.612	0.0174819	0.569359	0.413159
	Recent Nevado	Ombligo	1	0.0062	52.58	0.8258	25.92	1.1023	0.1325	20.04	0.0252	0.6362	101.275	0.0168733	0.569737	0.413389
	Recent Nevado	Ombligo	205.17	0.0052	52.69	0.7147	26.13	0.66	0.0753	20.13	0.017	0.6329	101.059	0.0145503	0.570222	0.415228
	Recent Nevado	Ombligo	137.29	0	52.58	0.9546	25.03	1.1134	0.1577	19.55	0.0266	0.5801	99.9927	0.0200153	0.570347	0.409638
	Recent Nevado	Ombligo	251.68	0	52.73	0.4994	26.16	1.3261	0.0935	19.96	0.0048	0.5874	101.364	0.0102566	0.570381	0.419363
	Recent Nevado	Ombligo	124.9	0.015	52.57	0.8611	25.28	1.1744	0.1576	19.68	0.0217	0.5767	100.34	0.0179486	0.570758	0.411293
	Recent Nevado	Ombligo	18.62	0.0339	53.35	0.7109	25.89	0.4114	0.0753	20	0	0.6692	101.142	0.0145834	0.570863	0.414554
	Recent Nevado	Ombligo	377.02	0.0467	52.67	0.4728	26.19	1.3854	0.1001	20.09	0.0318	0.5974	101.6	0.00967495	0.572008	0.418317
	Recent Nevado	Ombligo	45.52	0.0331	53.5	0.8299	25.84	0.5633	0.1459	20.2	0.0011	0.6273	101.744	0.0169004	0.572365	0.410735
	Recent Nevado	Ombligo	31.39	0	53.71	0.7278	25.77	0.4854	0.0812	20.06	0.008	0.6665	101.51	0.014928	0.572496	0.412576
	Recent Nevado	Ombligo	34.39	0	53.46	0.8179	25.85	0.4967	0.0547	20.21	0.0012	0.6183	101.515	0.0166527	0.572535	0.410812
	Recent Nevado	Ombligo	112.51	0	53.23	0.8875	25.09	0.649	0.1218	19.76	0.0129	0.558	100.318	0.0185029	0.573205	0.408292
	Recent Nevado	Ombligo	13.28	0.0237	52.62	0.8422	25.65	1.0194	0.0972	20.29	0.0222	0.6594	101.232	0.0171546	0.575041	0.407804
	Recent Nevado	Ombligo	25.02	0.0143	52.73	0.7813	25.73	0.9545	0.1064	20.41	0.0078	0.6043	101.338	0.0158597	0.576463	0.407677
	Recent Nevado	Ombligo	25.56	0.0111	52.84	0.8647	25.19	0.9737	0.1369	20.29	0.0232	0.6183	100.948	0.0177345	0.57901	0.403255
	Recent Nevado	Ombligo	23.26	0.0403	53.26	0.865	25.42	0.7872	0.1454	20.47	0.0023	0.6197	101.61	0.0175855	0.579037	0.403377
	Recent Nevado	Ombligo	41.52	0.0587	53.62	0.8215	25.33	0.4571	0.1123	20.53	0	0.5926	101.523	0.0167114	0.581092	0.402197
	Recent Nevado	Ombligo	12.13	0	52.96	0.9321	25.04	1.1008	0.1485	20.44	0.0424	0.6107	101.274	0.0190547	0.581395	0.399551
	Recent Nevado	Ombligo	43.98	0.0292	52.8	0.8384	25.14	0.9148	0.1393	20.5	0	0.6247	100.991	0.0171155	0.582294	0.400591
	Recent Nevado	Ombligo	19.42	0.0206	52.86	0.9371	24.99	0.8589	0.1523	20.66	0	0.6051	101.089	0.0190509	0.584402	0.396547
	Recent Nevado	Ombligo	37.84	0.0103	52.95	0.8255	25.02	0.8219	0.1254	20.68	0	0.6064	101.045	0.0168028	0.585686	0.397511
	Recent Nevado	Ombligo	13.01	0.0245	52.77	0.8523	24.97	1.0157	0.1213	20.72	0.0253	0.5977	101.106	0.0173329	0.586301	0.396366
	Recent Nevado	Ombligo	31.7	0.013	53.22	0.852	24.92	0.6703	0.1108	20.77	0.013	0.6079	101.177	0.0173162	0.587354	0.395329
	Recent Nevado	Ombligo	51.65	0.0435	53.71	0.848	24.87	0.487	0.0932	20.84	0	0.6205	101.512	0.0172159	0.588683	0.394101
	Recent Nevado	Ombligo	23.05	0.0536	53.19	0.8692	24.49	1.1987	0.1408	20.68	0.0139	0.557	101.195	0.0178265	0.59013	0.392043
	Recent Nevado	Ombligo	61.78	0.0312	53.52	0.7942	24.39	0.848	0.1323	21.15	0.0096	0.6189	101.494	0.0161227	0.597405	0.386472
	Recent Nevado	Ombligo	1	0.1063	51.92	1.82	21.7	2.34	0.37	21.16	0.0907	0.526	100.047	0.0377595	0.610831	0.351409
	Recent Nevado	Ombligo	71.91	0.0398	53.66	0.8089	23.39	0.9342	0.1123	21.89	0.0146	0.5787	101.428	0.0163336	0.615014	0.368652
	Recent Nevado	Ombligo	30.4	0.0348	53.12	1.2995	21.72	1.94	0.226	22.18	0.2975	0.4141	101.24	0.0264588	0.628356	0.345185
	Recent Nevado	Ombligo	82.04	0.0097	53.91	0.9036	21.81	1.0348	0.1462	22.9	0.0371	0.5152	101.273	0.0181481	0.639944	0.341908
	Recent Nevado	Ombligo	92.17	0.0473	54.61	1.1402	19.54	0.9283	0.1073	24.32	0.0888	0.3725	101.155	0.0226992	0.673665	0.303636
	Recent Nevado	Ombligo	37.75	0.0035	54.56	1.3859	19.14	0.7886	0.1702	24.47	0.1434	0.375	101.037	0.0275127	0.675907	0.29658
	Recent Nevado	Ombligo	45.1	0.0592	54.91	1.3553	19.02	0.7936	0.1324	24.5	0.1353	0.3482	101.262	0.0269494	0.677846	0.295204
	Recent Nevado	Ombligo	52.45	0.0076	54.75	1.3277	19	0.7996	0.1561	24.55	0.1426	0.3711	101.105	0.0263868	0.678874	0.29474
	Recent Nevado	Ombligo	142.82	0.0171	54.59	0.9033	19.16	1.2995	0.1225	24.56	0.1454	0.4274	101.225	0.0180547	0.683027	0.298918
	Recent Nevado	Ombligo	132.69	0.0722	54.45	1.1748	18.01	1.7187	0.1895	25.01	0.2409	0.3721	101.238	0.0234813	0.695542	0.280977
	Recent Nevado	Ombligo	102.3	0.0043	54.21	1.1664	17.72	1.8825	0.2163	25.11	0.2873	0.3735	100.971	0.0233581	0.69966	0.276982
	Recent Nevado	Ombligo	122.56	0.0002	54.57	1.1666	17.61	1.7619	0.1993	25.43	0.199	0.389	101.326	0.023195	0.70351	0.273295
	Recent Nevado	Ombligo	112.43	0	54.55	1.1669	16.97	1.8179	0.1862	25.7	0.252	0.3238	100.967	0.0232582	0.712731	0.264011
	Recent Nevado	Ombligo	69.24	0.0027	54.89	1.3853	16.75	0.8332	0.1141	26.12	0.0842	0.3731	100.554	0.0272682	0.715381	0.257351
	Recent Nevado	Ombligo	60.71	0.0123	54.83	1.3529	16.67	0.8463	0.1496	25.95	0.0698	0.3527	100.237	0.0268053	0.715391	0.257804
	Recent Nevado	Ombligo	52.18	0.0511	54.67	1.41	16.65	0.8071	0.1321	26.11	0.0645	0.3833	100.28	0.0277912	0.716055	0.256154
	Recent Nevado	Ombligo	43.65	0.0078	54.84	1.44	16.44	0.8475	0.1888	26.12	0.0982	0.3666	100.349	0.0284498	0.718027	0.253523
	Recent Nevado	Ombligo	77.77	0.0314	53.82	1.3341	15.91	2.17	0.2051	26.1	0.2432	0.3043	100.118	0.0266457	0.725322	0.248032
	Recent Nevado	Ombligo	35.12	0.0471	54.25	1.3436	15.81	1.89	0.2069	26.35	0.2274	0.3244	100.46	0.0266866	0.728207	0.245106
	Recent Nevado	Ombligo	26.59	0.0268	54.18	1.73	15.07	2.19	0.2042	26.37	0.3869	0.3189	100.477	0.0344732	0.731133	0.234394
	Recent Nevado	Ombligo	9.53	0.0574	54.2	1.3411	15.36	1.99	0.1854	26.55	0.2925	0.3287	100.305	0.026677	0.734836	0.238487
	Recent Nevado	Ombligo	18.06	0.0219	54.5	1.1991	15.11	1.9	0.1985	26.89	0.3418	0.3133	100.484	0.023788	0.742239	0.233973
	Young PD	Pink Pumice Flow	81.16	0.0413	51.92	0.7296	26.62	0.8324	0.1334	19.22	0	0.7339	100.234	0.0151211	0.554247	0.430631
	Young PD	Pink Pumice Flow	11.02	0.0542	51.91	0.7832	26.19	1.124	0.1432	19.2	0.0151	0.6904	100.111	0.0163369	0.557249	0.426414
	Young PD	Pink Pumice Flow	21.04	0.0197	51.25	0.9046	26.12	1.5817	0.1797	19.27	0.0181	0.6518	100.006	0.0188048	0.557372	0.423823
	Young PD	Pink Pumice Flow	71.14	0.0198	51.5	1.0503	25.65	1.5707	0.2301	19.15	0.0289	0.6162	99.8161	0.0220112	0.558407	0.419582
	Young PD	Pink Pumice Flow	1	0.0742	50.04	2.72	23.33	1.2875	0.189	19.37	0	0.6793	97.6901	0.0568069	0.562876	0.380317
	Young PD	Pink Pumice Flow	91.18	0.0235	52.21	0.6553	26	0.816	0.1155	19.83	0	0.6686	100.325	0.0135	0.568416	0.418084
	Young PD	Pink Pumice Flow	76.88	0.0162	51.8	1.67	24.17	0.6476	0.1571	19.74	0.0141	0.6673	98.8823	0.0347902	0.572188	0.393021
	Young PD	Pink Pumice Flow	38.94	0.0211	52.54	1.0464	24.6	0.8929	0.1533	19.74	0.0167	0.6736	99.6872	0.0219307	0.575642	0.402428
	Young PD	Pink Pumice Flow	44.36	0.0111	51.88	1.05	24.66	1.125	0.1942	19.81	0.0151	0.6048	99.3569	0.0219382	0.575899	0.402163
	Young PD	Pink Pumice Flow	33.52	0.0536	52.53	0.9964	24.65	0.7949	0.1527	19.84	0	0.6924	99.71	0.0208268	0.577008	0.402165
	Young PD	Pink Pumice Flow	49.78	0.0489	52.2	0.9875	24.46	1.0614	0.1364	19.74	0.0335	0.624	99.2935	0.0207694	0.577678	0.401553
	Young PD	Pink Pumice Flow	28.1	0.009	52.37	0.9114	24.76	0.7607	0.1804	19.9	0.0133	0.6919	99.6063	0.0190166	0.577734	0.403249
[truncated: 986 more rows]

[truncated: 3 more sheets: Amphiboles, Fe-Ti Oxides, LOD]
